# Supplementary material for: BAP1-Related ceRNA (NEAT1/miR-10a-5p/SERPINE1) Promotes Proliferation and Migration of Kidney Cancer Cells
Source: Front Oncol. 2022 Mar 29;12:852515. doi: 10.3389/fonc.2022.852515 (PMC9004599; doi:10.3389/fonc.2022.852515)
Supplement: Supplementary file 2 [file Table_5.xlsx]

## Sheet: Sheet1
CCK-8
si-NC+inhibitor NC				si-NEAT1+inhibitor NC				si-NC+inhibitor				si-NEAT1+inhibitor
0.322	0.332	0.342		0.335	0.347	0.339		0.341	0.346	0.35		0.339	0.345	0.351
0.538	0.557	0.572		0.491	0.51	0.505		0.621	0.612	0.636		0.521	0.497	0.511		786-O
0.894	0.878	0.91		0.702	0.713	0.704		1.002	0.932	0.954		0.887	0.825	0.856
1.394	1.31	1.33		0.889	0.912	0.932		1.434	1.49	1.391		1.324	1.312	1.308
si-NC+inhibitor NC				si-NEAT1+inhibitor NC				si-NC+inhibitor				si-NEAT1+inhibitor
0.339	0.345	0.351		0.338	0.349	0.339		0.34	0.343	0.347		0.339	0.345	0.351
0.451	0.462	0.46		0.43	0.443	0.432		0.581	0.572	0.56		0.501	0.482	0.49		ACHN
0.8	0.817	0.788		0.622	0.63	0.619		0.92	0.932	0.954		0.767	0.788	0.791
1.394	1.412	1.388		0.998	1.013	1.008		1.534	1.49	1.533		1.294	1.312	1.388
PCR
si-NC+inhibitor NC			si-NEAT1+inhibitor NC			si-NEAT1+inhibitor			si-NC+inhibitor
0.845457	1.16296	0.991582	0.542541	0.581481	0.561673	1.01242	0.944618	0.97793	1.69091	1.53454	1.66763		786-ACHN
0.920367	1.07944	1.00019	0.528612	0.476412	0.501834	1.01416	1.17306	1.09072	1.60245	1.75355	1.6763
NC			si-NEAT1#1			si-NEAT1#2
0.927094	1.07236	1.00055	0.507257	0.483232	0.495099	0.642064	0.669329	0.655555				786-ACHN
0.96555	1.03485	0.9996	0.562304	0.503276	0.531972	0.726695	0.59026	0.654934
si-NC			si-NEAT1
0.868277	1.13778	0.993938	1.57596	1.7608	1.66581
1.06299	0.938305	0.998704	1.78773	1.5033	1.63936
CCK-8
NC				si-NEAT1#1				si-NEAT1#2
0.34	0.345			0.338	0.343	0.35		0.34	0.343	0.347
0.49	0.492			0.45	0.453	0.432		0.481	0.472	0.46		ACHN
0.853	0.847			0.652	0.68	0.681		0.72	0.732	0.754
1.494	1.51			1.023	1.113	1.16		1.234	1.29	1.333
NC				si-NEAT1#1				si-NEAT1#2
0.332	0.342	0.352		0.345	0.358	0.356		0.341	0.343	0.347
0.588	0.607	0.612		0.521	0.513	0.505		0.533	0.567	0.581		786-O
1.019	1.007	1.121		0.752	0.713	0.724		0.82	0.831	0.864
1.624	1.61	1.63		1.021	1.027	1.11		1.201	1.21	1.188
LUC
miR-NC			miR-10a-5p
1.122	1.207	0.981	0.667	0.595	0.577		SERPINE1
1.201	0.971	1.005	1.011	1.132	0.996
miR-NC			miR-10a-5p
1.112	1.007	0.988	0.467	0.495	0.577		NEAT1
1.101	0.999	1.005	1.001	1.121	0.996
PCR
inhibitor NC			inhibitor			mimics NC			mimics
1.05594	0.945089	0.998976	0.668279	0.746659	0.706383	1.04186	0.958711	0.999424	9.24817	9.57431	9.40983		786-ACHN
1.09134	0.911363	0.997299	0.592997	0.720015	0.653427	1.14497	0.861729	0.993303	10.595	11.5139	11.0449
