# Supplementary material for: BAP1-Related ceRNA (NEAT1/miR-10a-5p/SERPINE1) Promotes Proliferation and Migration of Kidney Cancer Cells
Source: Front Oncol. 2022 Mar 29;12:852515. doi: 10.3389/fonc.2022.852515 (PMC9004599; doi:10.3389/fonc.2022.852515)
Supplement: Supplementary file 4 [file Table_7.xlsx]

## Sheet: Sheet 1
gene_name	gene_id	gene_biotype	baseMean	log2FoldChange	lfcSE	stat	pvalue	padj
LINC01587	ENSG00000082929	lncRNA	158.637	-0.755134	0.133047	-5.67568	1.38143e-08	1.23324e-07
AC000061.1	ENSG00000083622	lncRNA	0.965554	1.63926	0.887008	1.84808	0.0645906	0.108014
AC016026.1	ENSG00000093100	lncRNA	56.2556	-0.176345	0.108892	-1.61944	0.105352	0.162832
IGF2-AS	ENSG00000099869	lncRNA	3.47788	1.41136	0.28353	4.97781	6.43088e-07	3.92186e-06
RRN3P2	ENSG00000103472	lncRNA	68.8461	-0.498268	0.0876563	-5.68434	1.31318e-08	1.17875e-07
AC087235.1	ENSG00000115934	lncRNA	0.181029	-0.410311	0.411111	-0.998054	0.318253
DLEU2L	ENSG00000116652	lncRNA	34.5471	-0.274077	0.103213	-2.65544	0.00792043	0.0176917
PINK1-AS	ENSG00000117242	lncRNA	418.521	0.0605546	0.0394476	1.53506	0.124768	0.187271
SPART-AS1	ENSG00000120664	lncRNA	23.306	-0.303857	0.0929191	-3.27012	0.00107501	0.00305592
LINC00544	ENSG00000122043	lncRNA	3.86427	-0.537287	0.146592	-3.66519	0.000247151	0.000823428
KIAA0087	ENSG00000122548	lncRNA	25.1204	-0.524601	0.13892	-3.77629	0.000159181	0.000554322
AC105760.1	ENSG00000124835	lncRNA	1.10435	-0.37772	0.183342	-2.06019	0.0393802	0.0707338
MYRF-AS1	ENSG00000124915	lncRNA	10.5758	-0.16413	0.123187	-1.33237	0.182739	0.257119
LINC00029	ENSG00000125514	lncRNA	0.293151	-0.85385	0.389371	-2.19289	0.028315	0.0533164
FAM182A	ENSG00000125804	lncRNA	13.1962	-0.0568659	0.131063	-0.433884	0.664373	0.728417
LINC02871	ENSG00000125899	lncRNA	0.167962	-0.323803	0.408596	-0.792477	0.428083
C22orf24	ENSG00000128254	lncRNA	9.38976	0.12645	0.0838647	1.50779	0.131609	0.195673
TTTY1B	ENSG00000129816	lncRNA	0.00705338	-0.344232	2.89071	-0.119082	0.90521
TTTY1	ENSG00000129845	lncRNA	0.00589105	-0.322819	2.89071	-0.111674	0.911082
H19	ENSG00000130600	lncRNA	2800.28	0.900472	0.168021	5.35929	8.3551e-08	6.23964e-07
TTTY9B	ENSG00000131007	lncRNA	0.0184476	-0.248009	1.91774	-0.129324	0.897102
AC091132.1	ENSG00000131484	lncRNA	0.973979	-0.505356	0.186824	-2.70499	0.00683068	0.0155587
TTTY6	ENSG00000131538	lncRNA	0.0112727	-0.333505	2.89071	-0.115371	0.908151
TTTY6B	ENSG00000131548	lncRNA	0.00147685	-0.301366	2.89071	-0.104253	0.916968
LINC00470	ENSG00000132204	lncRNA	4.7881	-0.142453	0.209395	-0.680307	0.49631	0.576951
AL139352.1	ENSG00000132832	lncRNA	16.2087	-0.46989	0.122115	-3.84792	0.000119125	0.000427805
C7orf69	ENSG00000136275	lncRNA	1.36268	-0.471819	0.214815	-2.19639	0.0280639	0.0528913
AL355922.1	ENSG00000136315	lncRNA	3.85323	-0.674373	0.127105	-5.30562	1.12293e-07	8.11502e-07
AC027088.1	ENSG00000137808	lncRNA	0.0163116	-0.290835	1.93398	-0.150381	0.880464
AC062028.1	ENSG00000145063	lncRNA	5.32347	-0.111999	0.103334	-1.08385	0.278431	0.362672
CCDC39	ENSG00000145075	lncRNA	155.154	0.038827	0.0888051	0.437216	0.661955	0.726323
LINC01558	ENSG00000146521	lncRNA	45.0566	0.692133	0.134542	5.14438	2.68405e-07	1.78666e-06
LINC00525	ENSG00000146666	lncRNA	9.29615	-0.710777	0.1461	-4.86501	1.14449e-06	6.60436e-06
TTTY7	ENSG00000147753	lncRNA	0.00153988	-0.301366	2.89071	-0.104253	0.916968
TTTY7B	ENSG00000147761	lncRNA	0.0247408	-0.344232	2.89071	-0.119082	0.90521
SCP2D1-AS1	ENSG00000149443	lncRNA	0.190772	-0.531858	0.363331	-1.46384	0.143238
LINC00266-1	ENSG00000149656	lncRNA	1.77659	-0.0655853	0.152083	-0.431246	0.66629	0.73003
AL136982.1	ENSG00000151303	lncRNA	24.8008	-0.0804588	0.1147	-0.701469	0.48301	0.564759
PART1	ENSG00000152931	lncRNA	28.5787	1.66624	0.262408	6.3498	2.15596e-10	2.85286e-09
LINC00467	ENSG00000153363	lncRNA	393.341	-0.257904	0.0481738	-5.35361	8.62166e-08	6.41883e-07
ZFHX2-AS1	ENSG00000157306	lncRNA	72.5588	-0.369829	0.109701	-3.37125	0.000748292	0.00221682
TUBA3FP	ENSG00000161149	lncRNA	19.612	-0.0573796	0.0711479	-0.806483	0.419964	0.504814
C1orf147	ENSG00000162888	lncRNA	10.6418	-0.344936	0.126923	-2.71767	0.00657429	0.0150382
OBSCN-AS1	ENSG00000162913	lncRNA	58.5774	-0.148791	0.0832562	-1.78715	0.0739136	0.12106
LINC01931	ENSG00000162947	lncRNA	4.59166	-1.24175	0.163433	-7.59789	3.01002e-14	9.06846e-13
CCDC140	ENSG00000163081	lncRNA	0.244789	-0.215836	0.412253	-0.523552	0.60059	0.672255
LINC01116	ENSG00000163364	lncRNA	1335.22	-0.344715	0.0902391	-3.82002	0.000133443	0.000473324
SNHG16	ENSG00000163597	lncRNA	1213.16	-0.0315596	0.0510489	-0.618223	0.536428	0.613735
IGF2BP2-AS1	ENSG00000163915	lncRNA	2.91613	-0.761367	0.198654	-3.83263	0.00012678	0.000452316
LINC01600	ENSG00000164385	lncRNA	28.3837	0.0465815	0.0720037	0.646933	0.517676	0.596614
SMAD5-AS1	ENSG00000164621	lncRNA	5.2111	-0.836693	0.11823	-7.07683	1.47493e-12	3.16569e-11
ZNF22-AS1	ENSG00000165511	lncRNA	301.728	0.0578721	0.0484024	1.19564	0.231836	0.312148
ZNF667-AS1	ENSG00000166770	lncRNA	525.28	0.363615	0.0936317	3.88346	0.00010298	0.000376162
MIR202HG	ENSG00000166917	lncRNA	1.40395	0.274033	0.207326	1.32175	0.186252	0.261115
AL357033.1	ENSG00000167046	lncRNA	13.1452	0.110835	0.121602	0.911461	0.362052	0.448118
LINC00905	ENSG00000167459	lncRNA	0.206569	-0.316767	0.517425	-0.612199	0.540406
AC090152.1	ENSG00000167912	lncRNA	55.7901	-0.165348	0.106218	-1.55668	0.119545	0.180722
TMEM99	ENSG00000167920	lncRNA	754.035	-0.230256	0.0461158	-4.99299	5.9452e-07	3.65486e-06
LINC00917	ENSG00000168367	lncRNA	0.5588	-0.33554	0.260971	-1.28574	0.198535	0.275178
LINC01620	ENSG00000168746	lncRNA	1.18809	-0.57706	0.18212	-3.16857	0.00153191	0.00417151
AL512625.1	ENSG00000170161	lncRNA	54.1908	-0.0605379	0.0671712	-0.901248	0.367457	0.453301
TPT1-AS1	ENSG00000170919	lncRNA	687.321	-0.126063	0.061257	-2.05793	0.0395968	0.0710587
LINC00208	ENSG00000170983	lncRNA	0.181678	-0.562019	0.53081	-1.0588	0.289693
SHANK2-AS3	ENSG00000171671	lncRNA	0.812169	-0.334596	0.213871	-1.56447	0.117707	0.178502
MIR31HG	ENSG00000171889	lncRNA	12.2777	0.0608748	0.193748	0.314196	0.753372	0.804248
C11orf40	ENSG00000171987	lncRNA	0.49638	-0.616434	0.39599	-1.55669	0.119544	0.180722
PRSS30P	ENSG00000172460	lncRNA	28.7423	-0.19765	0.0961756	-2.05509	0.0398701	0.0714792
MIR4435-2HG	ENSG00000172965	lncRNA	1980.78	-0.108479	0.0624618	-1.73673	0.0824348	0.132683
DELEC1	ENSG00000173077	lncRNA	3.92711	-0.27113	0.150937	-1.79631	0.0724457	0.119
CCDC13-AS1	ENSG00000173811	lncRNA	20.1013	0.0175359	0.113836	0.154046	0.877574	0.905006
AC008080.1	ENSG00000173862	lncRNA	3.77211	-0.259696	0.120385	-2.15722	0.0309885	0.0576492
AC020659.1	ENSG00000174171	lncRNA	155.075	-0.173637	0.150048	-1.1572	0.24719	0.329199
DIRC1	ENSG00000174325	lncRNA	0.491965	-0.0519247	0.392943	-0.132143	0.894871	0.918935
SNHG11	ENSG00000174365	lncRNA	426.148	-0.26155	0.0548099	-4.77194	1.82457e-06	1.00438e-05
MIR1-1HG-AS1	ENSG00000174403	lncRNA	6.55857	-0.185945	0.174541	-1.06534	0.286724	0.371458
MIR1-1HG	ENSG00000174407	lncRNA	0.307162	-0.412688	0.332404	-1.24153	0.214411	0.292756
GRIK1-AS1	ENSG00000174680	lncRNA	7.37045	-0.47762	0.125911	-3.79331	0.00014865	0.000521253
SNHG29	ENSG00000175061	lncRNA	18756.5	-0.0565136	0.064385	-0.877745	0.380082	0.466004
TMEM51-AS1	ENSG00000175147	lncRNA	323.916	-0.120051	0.0958793	-1.25211	0.210529	0.288592
FAM182B	ENSG00000175170	lncRNA	50.5131	-0.0204844	0.0814871	-0.251382	0.801518	0.844088
AC007601.1	ENSG00000175604	lncRNA	12.8602	-1.27201	0.143011	-8.89453	5.86662e-19	4.59542e-17
LINC00476	ENSG00000175611	lncRNA	193.78	0.0631622	0.0525415	1.20214	0.229309	0.309346
LINC02873	ENSG00000175728	lncRNA	1.1158	-1.16635	0.254027	-4.59145	4.40186e-06	2.21929e-05
C15orf54	ENSG00000175746	lncRNA	11.9317	0.0964143	0.106639	0.904122	0.365931	0.451845
LINC01106	ENSG00000175772	lncRNA	57.2219	0.0322671	0.0808839	0.398931	0.689944	0.75011
ZBTB44-DT	ENSG00000175773	lncRNA	55.3568	-0.22038	0.0757986	-2.90745	0.00364393	0.00895428
LINC02694	ENSG00000175779	lncRNA	3.35371	-0.754518	0.136054	-5.54574	2.9271e-08	2.4194e-07
LINC02880	ENSG00000175967	lncRNA	6.50667	0.427301	0.142132	3.00638	0.0026438	0.00675304
DLEU1	ENSG00000176124	lncRNA	512.054	-0.296898	0.0501158	-5.92423	3.13772e-09	3.23471e-08
RPP38-DT	ENSG00000176236	lncRNA	10.5298	-0.0445628	0.0847278	-0.525953	0.598921	0.670731
AL138899.1	ENSG00000176320	lncRNA	8.32423	-0.137408	0.146636	-0.937065	0.348725	0.435102
AC104129.1	ENSG00000176349	lncRNA	3.09428	-1.23683	0.203438	-6.07965	1.20445e-09	1.36447e-08
AL033381.1	ENSG00000176515	lncRNA	84.6665	-0.0788075	0.17024	-0.46292	0.643422	0.710102
AC008969.1	ENSG00000176593	lncRNA	383.218	0.226344	0.0773829	2.92499	0.00344464	0.00852344
C14orf177	ENSG00000176605	lncRNA	0.318467	-0.617412	0.355911	-1.73473	0.0827879	0.133125
C20orf197	ENSG00000176659	lncRNA	32.5661	-0.331421	0.0946649	-3.50099	0.00046354	0.0014438
TTTY14	ENSG00000176728	lncRNA	73.4463	-0.741435	0.243825	-3.04085	0.0023591	0.00610099
C15orf56	ENSG00000176753	lncRNA	14.1417	0.151513	0.210197	0.720815	0.471023	0.553298
LINC00303	ENSG00000176754	lncRNA	3.08228	-0.186988	0.138246	-1.35257	0.176193	0.249563
MIR7-3HG	ENSG00000176840	lncRNA	1.07984	-0.76312	0.214858	-3.55173	0.000382703	0.00121642
AL358781.1	ENSG00000176868	lncRNA	0
TYMSOS	ENSG00000176912	lncRNA	133.137	-0.47247	0.0883023	-5.3506	8.76648e-08	6.51712e-07
AP000679.1	ENSG00000176984	lncRNA	1.46153	-0.175742	0.180247	-0.975006	0.329557	0.416057
IRAG1-AS1	ENSG00000177112	lncRNA	10.1037	-0.351171	0.112276	-3.12775	0.00176151	0.00471602
PRDM16-DT	ENSG00000177133	lncRNA	58.7229	1.40992	0.176181	8.0027	1.21724e-15	4.86636e-14
LINC01561	ENSG00000177234	lncRNA	5.36404	0.634762	0.231178	2.74577	0.00603691	0.0139532
C8orf31	ENSG00000177335	lncRNA	87.7704	-0.368171	0.130429	-2.82278	0.00476088	0.0113261
DLGAP1-AS1	ENSG00000177337	lncRNA	387.874	-0.201017	0.0610432	-3.29303	0.00099114	0.0028461
LINC00469	ENSG00000177338	lncRNA	0.558625	-0.261269	0.234577	-1.11379	0.26537	0.348693
FLJ13224	ENSG00000177340	lncRNA	6.20981	-0.0900442	0.0944506	-0.953347	0.340414	0.427093
FLJ40194	ENSG00000177369	lncRNA	4.0609	-0.301594	0.140602	-2.14502	0.031951	0.0592097
NINJ2-AS1	ENSG00000177406	lncRNA	634.928	-0.0260767	0.0555509	-0.46942	0.638769	0.70609
ZFAS1	ENSG00000177410	lncRNA	5947.56	-0.467358	0.0702004	-6.65749	2.7855e-11	4.45058e-10
C1orf167-AS1	ENSG00000177553	lncRNA	0.340435	-0.277504	0.37986	-0.730543	0.465058	0.54785
AL355390.1	ENSG00000177596	lncRNA	0.274768	-0.3223	0.345844	-0.931924	0.351376	0.437765
CASC2	ENSG00000177640	lncRNA	212.557	-0.188427	0.0636669	-2.95958	0.00308061	0.00772412
AC011944.1	ENSG00000177699	lncRNA	8.75775	-0.0931376	0.123609	-0.753484	0.451159	0.534597
AC105206.1	ENSG00000177725	lncRNA	2.13532	-0.819832	0.20238	-4.05096	5.10087e-05	0.000200809
AC025171.1	ENSG00000177738	lncRNA	254.477	0.154904	0.0481003	3.22044	0.00127993	0.00356177
FAM87B	ENSG00000177757	lncRNA	11.8877	-0.140379	0.0853966	-1.64385	0.100208	0.156188
AL162595.1	ENSG00000177788	lncRNA	42.8628	0.0217249	0.0681343	0.318854	0.749837	0.801207
TMEM78	ENSG00000177800	lncRNA	1.45881	-0.43704	0.177922	-2.45636	0.0140354	0.0291139
TENM3-AS1	ENSG00000177822	lncRNA	78.2252	-0.104529	0.165283	-0.632426	0.527108	0.605096
ZNRF3-AS1	ENSG00000177993	lncRNA	0
AL161668.1	ENSG00000178107	lncRNA	0.233305	-0.475852	0.377098	-1.26188	0.206993	0.284722
FAM27E5	ENSG00000178130	lncRNA	0.03838	-0.291031	1.19169	-0.244218	0.807062
C9orf62	ENSG00000178243	lncRNA	0.0886066	-0.334373	0.778616	-0.429446	0.667599
FAM230I	ENSG00000178248	lncRNA	3.87556	0.0329628	0.194414	0.16955	0.865364	0.895741
AC068473.1	ENSG00000178412	lncRNA	1.21942	0.347767	0.148893	2.33568	0.0195079	0.0387045
LINC00314	ENSG00000178457	lncRNA	0.137679	-0.281192	0.548942	-0.512244	0.60848
C5orf64	ENSG00000178722	lncRNA	9.83039	0.213771	0.118557	1.80311	0.0713713	0.117484
LMO7DN	ENSG00000178734	lncRNA	1.75728	-0.209012	0.203127	-1.02897	0.303493	0.388982
ADORA2A-AS1	ENSG00000178803	lncRNA	593.915	-0.251331	0.106177	-2.36709	0.0179284	0.0359699
LINC00324	ENSG00000178977	lncRNA	226.366	-0.178289	0.0480798	-3.70818	0.000208751	0.00070711
AC245177.1	ENSG00000179028	lncRNA	0.0174082	-0.322974	1.8073	-0.178705	0.85817
AC020907.1	ENSG00000179066	lncRNA	5.78451	-1.94054	0.254881	-7.61351	2.66754e-14	8.10592e-13
C9orf106	ENSG00000179082	lncRNA	36.376	0.24914	0.116056	2.14672	0.0318158	0.0590039
LINC00670	ENSG00000179136	lncRNA	6.56996	0.0230559	0.135215	0.170512	0.864607	0.895255
MTUS2-AS1	ENSG00000179141	lncRNA	3.03008	-0.090313	0.223877	-0.403404	0.686651	0.747283
LINC00311	ENSG00000179219	lncRNA	2.98103	-0.601229	0.183041	-3.28467	0.00102102	0.00292201
AL162457.1	ENSG00000179253	lncRNA	4.38567	-0.248128	0.156501	-1.58547	0.112859	0.172509
LINC00174	ENSG00000179406	lncRNA	585.65	-0.422599	0.0907142	-4.65857	3.18412e-06	1.65975e-05
IL6-AS1	ENSG00000179428	lncRNA	12.2272	-0.733005	0.174983	-4.18901	2.80171e-05	0.000117365
AL049647.1	ENSG00000179447	lncRNA	1.70248	-0.341977	0.205576	-1.6635	0.0962115	0.151021
LINC01699	ENSG00000179452	lncRNA	1.5161	-0.093035	0.172056	-0.540726	0.588696	0.661511
EIF3J-DT	ENSG00000179523	lncRNA	620.392	0.0649256	0.0409511	1.58544	0.112866	0.172514
AP003471.1	ENSG00000179577	lncRNA	14.0232	-0.644108	0.125981	-5.11276	3.17491e-07	2.08255e-06
LINC00305	ENSG00000179676	lncRNA	0.777132	-0.380454	0.222072	-1.7132	0.0866756	0.138424
FLJ37453	ENSG00000179743	lncRNA	212.379	0.139957	0.0513611	2.72497	0.00643067	0.0147487
AC135776.1	ENSG00000179755	lncRNA	0.0357047	-0.355231	1.41075	-0.251802	0.801194
PCBP1-AS1	ENSG00000179818	lncRNA	1425.89	-0.158432	0.0506243	-3.12957	0.00175065	0.00469435
PIK3CD-AS1	ENSG00000179840	lncRNA	7.0184	-0.660521	0.109992	-6.00515	1.91157e-09	2.07426e-08
LINC00652	ENSG00000179935	lncRNA	12.0219	-0.139444	0.0939282	-1.48458	0.137656	0.203216
LINC02870	ENSG00000180066	lncRNA	2.79015	-0.518285	0.164705	-3.14675	0.00165098	0.00445841
ACTA2-AS1	ENSG00000180139	lncRNA	167.927	-0.169988	0.11761	-1.44535	0.14836	0.216256
PRNT	ENSG00000180259	lncRNA	0.377764	-0.400522	0.389204	-1.02908	0.303443	0.388928
LINC00304	ENSG00000180422	lncRNA	10.1952	-0.0359421	0.159737	-0.225009	0.821973	0.860938
AC022148.1	ENSG00000180458	lncRNA	5.36712	0.127191	0.115293	1.1032	0.269942	0.353565
PRR26	ENSG00000180525	lncRNA	643.327	-0.116182	0.0926389	-1.25413	0.209793	0.287804
C9orf139	ENSG00000180539	lncRNA	53.5681	-0.247901	0.104643	-2.36901	0.0178356	0.0358182
LINC02363	ENSG00000180712	lncRNA	21.1237	0.00177908	0.139891	0.0127176	0.989853	0.992495
WDFY3-AS2	ENSG00000180769	lncRNA	795.601	-0.133362	0.0699504	-1.90653	0.0565817	0.0964512
CSNK1G2-AS1	ENSG00000180846	lncRNA	5.37478	-0.345553	0.1374	-2.51494	0.0119054	0.0252162
LINC01559	ENSG00000180861	lncRNA	448.735	-1.6714	0.24587	-6.79791	1.06147e-11	1.86435e-10
LINC01555	ENSG00000180869	lncRNA	1.06798	0.213478	0.224513	0.950845	0.341683	0.428228
LINC02878	ENSG00000181097	lncRNA	25.2978	-0.206877	0.0884466	-2.339	0.0193352	0.0384206
AC004832.1	ENSG00000181123	lncRNA	3.32809	-0.0543761	0.203979	-0.266577	0.789795	0.834099
FER1L6-AS1	ENSG00000181171	lncRNA	0.488264	-0.162529	0.387873	-0.419028	0.675196	0.737478
HECW1-IT1	ENSG00000181211	lncRNA	0.265397	-0.438427	0.484798	-0.904349	0.36581	0.45172
LINC00471	ENSG00000181798	lncRNA	28.806	-0.296785	0.0868079	-3.41887	0.00062881	0.00189645
CELF2-AS1	ENSG00000181800	lncRNA	20.8695	-0.343797	0.145126	-2.36897	0.0178379	0.0358213
LINC02724	ENSG00000181908	lncRNA	33.7971	-0.00316246	0.0804234	-0.0393226	0.968633	0.976604
OGFRP1	ENSG00000182057	lncRNA	22.3426	-0.0820245	0.0679177	-1.2077	0.227161	0.307045
TP53TG1	ENSG00000182165	lncRNA	979.188	-0.678827	0.0654912	-10.3652	3.57124e-25	8.84585e-23
PRR34	ENSG00000182257	lncRNA	57.0709	-0.0562687	0.0497686	-1.13061	0.25822	0.34101
C17orf77	ENSG00000182352	lncRNA	1.18481	1.07681	0.299641	3.59365	0.000326077	0.00105375
FAM87A	ENSG00000182366	lncRNA	7.96703	-0.226141	0.148093	-1.52702	0.126755	0.189645
AC138028.1	ENSG00000182376	lncRNA	6.00474	-0.406458	0.165862	-2.45058	0.0142627	0.0295055
LINC00334	ENSG00000182586	lncRNA	3.21166	0.0647269	0.134946	0.47965	0.631476	0.699598
LINC01006	ENSG00000182648	lncRNA	526.065	-0.237801	0.0598999	-3.96997	7.18804e-05	0.000273076
AC239585.1	ENSG00000182776	lncRNA	0.0295393	-0.323091	1.303	-0.24796	0.804165
FAM230E	ENSG00000182824	lncRNA	0.0118197	-0.333584	2.74574	-0.121491	0.903302
PRKCZ-AS1	ENSG00000182873	lncRNA	84.7283	-0.024078	0.0765686	-0.314462	0.75317	0.804055
TSPEAR-AS2	ENSG00000182912	lncRNA	18.9046	-0.775481	0.168016	-4.61551	3.92132e-06	1.99678e-05
PRORY	ENSG00000183146	lncRNA	0.363853	-0.487085	0.496701	-0.98064	0.32677	0.413153
AC138356.1	ENSG00000183154	lncRNA	22.4739	-0.0121762	0.0584409	-0.208351	0.834955	0.87131
WT1-AS	ENSG00000183242	lncRNA	18.2557	0.340099	0.197681	1.72044	0.0853525	0.136621
LINC01547	ENSG00000183250	lncRNA	185.169	-0.340089	0.0720785	-4.71831	2.3781e-06	1.27515e-05
AC005037.1	ENSG00000183308	lncRNA	9.75748	-0.310166	0.0738561	-4.1996	2.67384e-05	0.000112544
TTTY8	ENSG00000183385	lncRNA	0.00318056	-0.312093	2.89071	-0.107964	0.914024
FLJ40288	ENSG00000183470	lncRNA	0.73398	-0.850574	0.326498	-2.60514	0.00918364	0.0200999
COL18A1-AS1	ENSG00000183535	lncRNA	27.5745	0.263585	0.132211	1.99366	0.0461887	0.0811219
AC131971.1	ENSG00000183562	lncRNA	8.40828	-0.339842	0.116536	-2.91621	0.00354316	0.00873806
C15orf32	ENSG00000183643	lncRNA	0.157839	-0.389318	0.601018	-0.647764	0.517137
LINC00518	ENSG00000183674	lncRNA	0.733771	-0.0812518	0.323494	-0.251169	0.801683	0.844184
DOCK8-AS1	ENSG00000183784	lncRNA	570.54	-0.328625	0.111503	-2.94724	0.00320623	0.00800317
NCF4-AS1	ENSG00000183822	lncRNA	1.2956	-0.424338	0.167569	-2.53232	0.011331	0.0241705
DSCR4	ENSG00000184029	lncRNA	1.08155	0.60666	0.434649	1.39575	0.162791	0.233649
SREBF2-AS1	ENSG00000184068	lncRNA	195.502	-0.142271	0.0539461	-2.63729	0.0083572	0.0185282
C11orf72	ENSG00000184224	lncRNA	3.10175	0.109455	0.113573	0.963742	0.335175	0.421698
LINC00315	ENSG00000184274	lncRNA	17.5876	0.132835	0.0787176	1.68748	0.0915107	0.144829
UMODL1-AS1	ENSG00000184385	lncRNA	2.99736	0.137157	0.22698	0.604269	0.545665	0.622158
AP001062.1	ENSG00000184441	lncRNA	196.874	-0.0417973	0.0720183	-0.58037	0.561665	0.637042
AC132216.1	ENSG00000184566	lncRNA	0.140362	-0.345665	0.574123	-0.602075	0.547124
FAM167A-AS1	ENSG00000184608	lncRNA	1.49151	-0.838517	0.261758	-3.20341	0.00135812	0.00375313
B3GALT5-AS1	ENSG00000184809	lncRNA	9.207	0.945682	0.223778	4.22598	2.37901e-05	0.000101448
LINC00308	ENSG00000184856	lncRNA	0.198698	-0.519646	0.707114	-0.734883	0.462411
TTTY13	ENSG00000184991	lncRNA	0.0223358	-0.365801	2.36063	-0.154959	0.876854
AC000068.1	ENSG00000185065	lncRNA	21.8053	-0.0470677	0.089575	-0.525456	0.599267	0.671052
LINC00482	ENSG00000185168	lncRNA	86.8414	-0.319375	0.135152	-2.36307	0.0181241	0.0363085
LINC00313	ENSG00000185186	lncRNA	3.62592	-0.271947	0.182397	-1.49096	0.135972	0.201169
WASIR1	ENSG00000185203	lncRNA	0.741548	-0.833812	0.305243	-2.73163	0.00630215	0.0144917
TMEM105	ENSG00000185332	lncRNA	16.1223	-0.506674	0.154401	-3.28156	0.00103236	0.00294893
LINC00158	ENSG00000185433	lncRNA	19.4455	-0.775408	0.147048	-5.27317	1.34091e-07	9.52204e-07
SPATA8	ENSG00000185594	lncRNA	3.52694	-0.83686	0.219484	-3.81285	0.000137376	0.000485659
TTTY8B	ENSG00000185700	lncRNA	0
HDHD5-AS1	ENSG00000185837	lncRNA	15.4252	-0.345948	0.092195	-3.75235	0.000175183	0.000604325
LINC01405	ENSG00000185847	lncRNA	2.02342	-0.440221	0.286799	-1.53495	0.124796	0.187301
LINC00839	ENSG00000185904	lncRNA	885.284	-0.174275	0.0884358	-1.97064	0.0487652	0.0849825
AC021092.1	ENSG00000186019	lncRNA	8.57473	0.345692	0.0794511	4.35101	1.35513e-05	6.11495e-05
MATN1-AS1	ENSG00000186056	lncRNA	118.153	-0.287123	0.0773017	-3.71432	0.000203751	0.000692118
LINC02610	ENSG00000186235	lncRNA	27.5072	-0.233993	0.10971	-2.13284	0.0329378	0.0607747
MIR22HG	ENSG00000186594	lncRNA	1231.54	0.255401	0.0758366	3.36778	0.000757756	0.00224225
KTN1-AS1	ENSG00000186615	lncRNA	103.504	0.022922	0.0664737	0.344828	0.730223	0.784714
LINC01551	ENSG00000186960	lncRNA	2.98381	-0.264889	0.291233	-0.909542	0.363064	0.44908
LINC00207	ENSG00000187012	lncRNA	0.719422	0.502404	0.278224	1.80575	0.070957	0.116878
LINC02875	ENSG00000187013	lncRNA	45.1594	-0.0877014	0.0794248	-1.10421	0.269504	0.353162
AC092118.1	ENSG00000187185	lncRNA	69.5134	-0.29598	0.104811	-2.82393	0.00474386	0.0112932
AC100800.1	ENSG00000187229	lncRNA	1.63637	-1.93533	0.345101	-5.608	2.04675e-08	1.75821e-07
LINC02583	ENSG00000187600	lncRNA	0.570013	-0.857414	0.294368	-2.91273	0.00358285	0.00882596
TCL6	ENSG00000187621	lncRNA	138.448	0.363584	0.195531	1.85947	0.06296	0.105634
AC097382.1	ENSG00000187904	lncRNA	3.70708	-0.866163	0.169218	-5.11863	3.07766e-07	2.02427e-06
AC091057.1	ENSG00000187951	lncRNA	151.121	-0.0475544	0.0741452	-0.641369	0.521283	0.599791
FAM230D	ENSG00000187979	lncRNA	0.0516169	-0.152065	0.968353	-0.157035	0.875217
SNHG28	ENSG00000188004	lncRNA	83.5113	-0.0798235	0.0704503	-1.13305	0.257194	0.339919
LINC00265	ENSG00000188185	lncRNA	221.917	0.0743778	0.102843	0.723219	0.469545	0.552019
PP7080	ENSG00000188242	lncRNA	1406.87	-0.126171	0.0979422	-1.28822	0.197669	0.274211
FAM230G	ENSG00000188280	lncRNA	0.459288	-0.373059	0.390783	-0.954644	0.339758	0.426468
AC092171.1	ENSG00000188365	lncRNA	5.26799	-0.51039	0.128876	-3.96031	7.48534e-05	0.000283057
C22orf34	ENSG00000188511	lncRNA	221.302	-0.0187933	0.0774149	-0.242761	0.80819	0.849554
AC010969.1	ENSG00000188525	lncRNA	2.25814	-0.200566	0.170036	-1.17955	0.238178	0.31927
LINC00319	ENSG00000188660	lncRNA	0.336301	-0.0794437	0.28894	-0.274949	0.783356	0.828661
CYP51A1-AS1	ENSG00000188693	lncRNA	9.4914	0.157303	0.0833675	1.88687	0.0591781	0.100195
LINC00910	ENSG00000188825	lncRNA	167.734	-0.0192292	0.0458103	-0.419757	0.674663	0.73707
LINC00994	ENSG00000189196	lncRNA	1.30337	0.0107455	0.182112	0.0590046	0.952948	0.964738
PAX8-AS1	ENSG00000189223	lncRNA	602.784	-0.853194	0.10943	-7.79673	6.3531e-15	2.20549e-13
AC069277.1	ENSG00000189229	lncRNA	3.36831	-0.471027	0.257217	-1.83125	0.0670638	0.111466
LINC00943	ENSG00000189238	lncRNA	28.9585	-0.416811	0.125523	-3.3206	0.000898231	0.00260923
LINC01164	ENSG00000189275	lncRNA	0.401331	-0.220294	0.389293	-0.565884	0.571473	0.645608
ANKRD62P1-PARP4P3	ENSG00000189295	lncRNA	0.577832	0.122428	0.319312	0.38341	0.701415	0.759904
AC073349.1	ENSG00000189316	lncRNA	3.26783	0.0896261	0.184538	0.485678	0.627196	0.69592
SPATA41	ENSG00000189419	lncRNA	15.8784	-0.134793	0.0814889	-1.65412	0.0981027	0.153413
SPAG16-DT	ENSG00000196096	lncRNA	3.53298	0.0944613	0.114289	0.826515	0.408512	0.493779
C8orf86	ENSG00000196166	lncRNA	0.972856	-0.132898	0.215357	-0.617103	0.537167	0.614365
COLCA1	ENSG00000196167	lncRNA	542.834	0.0285326	0.127883	0.223115	0.823446	0.862048
RNF216P1	ENSG00000196204	lncRNA	732.365	-0.163138	0.0358406	-4.55177	5.31955e-06	2.63243e-05
LINC00615	ENSG00000196243	lncRNA	0.295668	-0.339988	0.353359	-0.96216	0.335969	0.422557
LINC00523	ENSG00000196273	lncRNA	0.516733	-0.655923	0.31862	-2.05864	0.0395288	0.0709588
GARS1-DT	ENSG00000196295	lncRNA	1486.86	-0.442218	0.0851528	-5.19324	2.0667e-07	1.40971e-06
C9orf163	ENSG00000196366	lncRNA	20.8524	-0.269882	0.107542	-2.50954	0.0120888	0.0255468
AL138767.1	ENSG00000196566	lncRNA	0.769348	-0.629919	0.276178	-2.28085	0.0225574	0.0438238
LUADT1	ENSG00000196634	lncRNA	0.342046	-0.501367	0.32834	-1.52698	0.126767	0.18965
LINC00173	ENSG00000196668	lncRNA	221.219	-0.279094	0.133891	-2.08448	0.0371161	0.0672602
PDXDC2P-NPIPB14P	ENSG00000196696	lncRNA	271.246	-0.252238	0.0976537	-2.58298	0.00979507	0.0212779
LINC01560	ENSG00000196741	lncRNA	169.595	0.25648	0.0431112	5.94928	2.69329e-09	2.82419e-08
SNHG17	ENSG00000196756	lncRNA	810.256	-0.265908	0.0679862	-3.9112	9.18389e-05	0.000339578
AC079612.1	ENSG00000196758	lncRNA	0.385088	-0.678292	0.375296	-1.80735	0.0707079	0.116547
CTBP1-DT	ENSG00000196810	lncRNA	1129.29	0.0813791	0.0296333	2.7462	0.00602892	0.0139375
AC090286.1	ENSG00000196893	lncRNA	28.6188	-0.0421172	0.12179	-0.345817	0.72948	0.784062
SCOC-AS1	ENSG00000196951	lncRNA	46.416	-0.282347	0.0654307	-4.3152	1.59456e-05	7.07593e-05
GPRACR	ENSG00000196979	lncRNA	7.64764	0.0523365	0.189468	0.276229	0.782372	0.827825
NPSR1-AS1	ENSG00000197085	lncRNA	5.32872	-0.969446	0.253643	-3.82209	0.000132323	0.000469864
AC068631.1	ENSG00000197099	lncRNA	9.7203	0.00905593	0.138107	0.065572	0.947719	0.960547
LINC02291	ENSG00000197176	lncRNA	0.257794	-0.59674	0.411487	-1.4502	0.147001	0.214665
CH17-340M24.3	ENSG00000197180	lncRNA	210.047	-0.617063	0.0654544	-9.42736	4.20542e-21	5.16646e-19
MIRLET7BHG	ENSG00000197182	lncRNA	143.782	-0.447379	0.110109	-4.06306	4.84339e-05	0.000191529
AP000550.1	ENSG00000197210	lncRNA	0.235657	-0.239215	0.461848	-0.517952	0.604492	0.675796
LINC00336	ENSG00000197251	lncRNA	13.1653	-0.18542	0.128485	-1.44313	0.148985	0.21705
RAMP2-AS1	ENSG00000197291	lncRNA	95.2083	0.770519	0.0804827	9.57373	1.0312e-21	1.42761e-19
HMGA2-AS1	ENSG00000197301	lncRNA	9.14079	0.34361	0.168329	2.0413	0.0412207	0.0735752
GATA3-AS1	ENSG00000197308	lncRNA	4.71898	1.56043	0.245277	6.36189	1.99285e-10	2.65717e-09
C17orf102	ENSG00000197322	lncRNA	7.33427	0.0873475	0.152306	0.573501	0.566305	0.641165
AC008543.1	ENSG00000197332	lncRNA	40.533	0.436274	0.0775786	5.62364	1.8698e-08	1.61999e-07
AC003975.1	ENSG00000197462	lncRNA	0.320816	-0.554246	0.368242	-1.50511	0.132295	0.196572
LINC00477	ENSG00000197503	lncRNA	0.922951	-0.873554	0.260662	-3.3513	0.000804345	0.00236347
IRF1-AS1	ENSG00000197536	lncRNA	572.809	-0.305204	0.0689348	-4.42743	9.53635e-06	4.4514e-05
AC068051.1	ENSG00000197585	lncRNA	13.6224	-0.0859196	0.142406	-0.603344	0.54628	0.622751
ATP11AUN	ENSG00000197595	lncRNA	4.00967	0.516015	0.140092	3.6834	0.000230141	0.000772939
AC106870.1	ENSG00000197644	lncRNA	0.419635	-0.317635	0.316261	-1.00434	0.315212	0.401223
AC007952.1	ENSG00000197665	lncRNA	0.0545293	-0.365917	1.26875	-0.288407	0.773035
AL157838.1	ENSG00000197670	lncRNA	76.1989	-0.337518	0.101318	-3.33129	0.000864442	0.00252034
C14orf178	ENSG00000197734	lncRNA	1.63879	-0.23367	0.154676	-1.51071	0.130862	0.194772
AC011450.1	ENSG00000197813	lncRNA	33.0549	-0.0097488	0.115753	-0.084221	0.932881	0.948698
AC122129.1	ENSG00000197815	lncRNA	45.2666	0.286346	0.100709	2.84331	0.00446469	0.0106936
MDS2	ENSG00000197880	lncRNA	18.0491	-0.197862	0.0938119	-2.10913	0.0349331	0.0639057
CYYR1-AS1	ENSG00000197934	lncRNA	4.69134	-0.347235	0.119805	-2.89834	0.00375143	0.00918201
SNHG12	ENSG00000197989	lncRNA	914.37	-0.366219	0.100456	-3.64557	0.000266796	0.000881511
DSCR8	ENSG00000198054	lncRNA	1.32732	0.36695	0.434894	0.843771	0.398798	0.484349
AC025279.1	ENSG00000198106	lncRNA	9.3755	0.104062	0.0995295	1.04554	0.295774	0.381036
AFDN-DT	ENSG00000198221	lncRNA	113.701	0.063576	0.0858297	0.740722	0.458862	0.542014
AL354714.1	ENSG00000198358	lncRNA	1.60382	-0.552894	0.231565	-2.38764	0.0169569	0.0342895
LINC02692	ENSG00000198454	lncRNA	0.216774	-0.207682	0.311062	-0.667654	0.504354
FLVCR1-DT	ENSG00000198468	lncRNA	123.659	-0.204778	0.0995591	-2.05685	0.0397003	0.0712054
AC007920.1	ENSG00000198491	lncRNA	0.897019	0.0438824	0.271663	0.161532	0.871674	0.900647
NBR2	ENSG00000198496	lncRNA	306.882	-0.158962	0.0579318	-2.74396	0.00607034	0.0140219
C3orf35	ENSG00000198590	lncRNA	33.8617	-0.595827	0.102296	-5.82452	5.72784e-09	5.57859e-08
AC135895.1	ENSG00000198671	lncRNA	0.348104	-0.60793	0.39766	-1.52877	0.126322	0.189131
LINC01565	ENSG00000198685	lncRNA	1.07044	-0.503442	0.221055	-2.27745	0.0227595	0.0441655
SSBP3-AS1	ENSG00000198711	lncRNA	37.3573	-0.173742	0.094897	-1.83084	0.067124	0.11154
AC013549.1	ENSG00000203258	lncRNA	3.6386	-1.0261	0.159856	-6.41888	1.37277e-10	1.89595e-09
AL157414.1	ENSG00000203266	lncRNA	0.354247	-0.741973	0.467791	-1.58612	0.112712	0.172334
AL590705.1	ENSG00000203279	lncRNA	16.831	-0.126476	0.111409	-1.13524	0.256275	0.339022
KIAA1671-AS1	ENSG00000203280	lncRNA	35.0585	0.30298	0.0900368	3.36507	0.000765239	0.00226147
TDRKH-AS1	ENSG00000203288	lncRNA	16.6699	-0.229483	0.076294	-3.00787	0.00263083	0.00672404
FAM78B-AS1	ENSG00000203307	lncRNA	4.46565	0.182003	0.116171	1.56668	0.117189	0.177882
CARNMT1-AS1	ENSG00000203321	lncRNA	6.65269	-0.496586	0.133485	-3.72017	0.000199088	0.000677736
AL445248.1	ENSG00000203325	lncRNA	8.36781	-0.324092	0.118221	-2.74141	0.00611757	0.0141168
AC012358.1	ENSG00000203327	lncRNA	7.90352	-0.373289	0.128664	-2.90127	0.00371654	0.00910487
AP003027.1	ENSG00000203334	lncRNA	0.3061	-0.563861	0.338005	-1.66821	0.0952749	0.149783
AC006019.1	ENSG00000203335	lncRNA	0.171453	-0.623757	0.645688	-0.966035	0.334027
LINC01562	ENSG00000203356	lncRNA	8.0482	-0.0194348	0.0817653	-0.23769	0.812121	0.852686
POLH-AS1	ENSG00000203362	lncRNA	25.2114	-0.0818934	0.0648525	-1.26276	0.206674	0.284377
AL390760.1	ENSG00000203364	lncRNA	1.76517	-0.0893007	0.169875	-0.525685	0.599107	0.670906
AC105020.1	ENSG00000203392	lncRNA	153.1	-0.30605	0.116432	-2.62857	0.00857453	0.018945
AC015969.1	ENSG00000203395	lncRNA	0.46717	-0.688387	0.236501	-2.91072	0.003606	0.0088744
AL591503.1	ENSG00000203402	lncRNA	0.245671	-0.469473	0.363729	-1.29072	0.1968	0.273261
AL353740.1	ENSG00000203434	lncRNA	5.69468	-0.477891	0.208521	-2.29181	0.0219166	0.0427819
LINC00449	ENSG00000203441	lncRNA	6.13077	-0.229556	0.110722	-2.07326	0.0381479	0.0688604
AC004988.1	ENSG00000203446	lncRNA	19.2202	-0.837333	0.158469	-5.2839	1.26462e-07	9.0349e-07
AL354956.1	ENSG00000203469	lncRNA	0
AC009163.1	ENSG00000203472	lncRNA	0.0135856	-0.312209	2.26709	-0.137714	0.890467
AL133216.1	ENSG00000203496	lncRNA	0.469085	0.00763299	0.236957	0.0322125	0.974303	0.980917
PDCD4-AS1	ENSG00000203497	lncRNA	128.959	-0.0590744	0.0623429	-0.947572	0.343347	0.429785
AL139390.1	ENSG00000203498	lncRNA	0.449158	-0.297552	0.353703	-0.84125	0.400208	0.485715
RBMS3-AS2	ENSG00000203506	lncRNA	7.10431	-0.776644	0.15521	-5.00382	5.6206e-07	3.47395e-06
AP000753.1	ENSG00000203520	lncRNA	1.05841	-0.531702	0.189788	-2.80156	0.0050856	0.0120157
SCUBE1-AS1	ENSG00000203527	lncRNA	0.790018	-0.515571	0.234247	-2.20097	0.0277383	0.0523509
AL450313.1	ENSG00000203565	lncRNA	0.173603	-0.422973	0.43306	-0.976709	0.328713
LINC02408	ENSG00000203585	lncRNA	5.82358	0.337103	0.12119	2.78161	0.00540907	0.0126837
IGBP1-AS1	ENSG00000203588	lncRNA	11.3738	-0.301707	0.110066	-2.74116	0.00612235	0.0141264
AC005342.1	ENSG00000203593	lncRNA	4.49474	-0.45211	0.118944	-3.80104	0.00014409	0.000506813
LINC00970	ENSG00000203601	lncRNA	5.69239	-0.355181	0.140854	-2.52162	0.0116814	0.0248166
AC096543.1	ENSG00000203605	lncRNA	0.0893463	-0.334452	0.711978	-0.469751	0.638533
AL354919.1	ENSG00000203620	lncRNA	2.07496	-0.465022	0.191044	-2.43411	0.0149284	0.0307245
AC144450.1	ENSG00000203635	lncRNA	1.26401	-0.0447098	0.203226	-0.22	0.825871	0.863936
AC012456.1	ENSG00000203643	lncRNA	0.182795	-0.443207	0.468003	-0.947018	0.34363
AC083799.1	ENSG00000203644	lncRNA	364.698	-0.469324	0.0495574	-9.47031	2.79015e-21	3.5814e-19
LINC00501	ENSG00000203645	lncRNA	71.8088	-0.378379	0.103649	-3.65058	0.000261652	0.00086664
LINC01285	ENSG00000203650	lncRNA	27.6169	-0.131855	0.0913179	-1.44391	0.148765	0.216757
IBA57-DT	ENSG00000203684	lncRNA	12.0277	-0.137911	0.107245	-1.28594	0.198464	0.27511
LINC02487	ENSG00000203688	lncRNA	34.6668	0.0560153	0.0952003	0.588394	0.556268	0.632031
SERTAD4-AS1	ENSG00000203706	lncRNA	203.506	-0.306362	0.0854836	-3.58386	0.000338547	0.00108929
MIR29B2CHG	ENSG00000203709	lncRNA	539.767	-0.29631	0.118851	-2.49313	0.0126623	0.0266017
C6orf99	ENSG00000203711	lncRNA	28.2659	-0.503542	0.0921603	-5.46376	4.66155e-08	3.67851e-07
LINC00862	ENSG00000203721	lncRNA	15.7824	-0.639676	0.178388	-3.58587	0.000335954	0.00108201
LINC00272	ENSG00000203729	lncRNA	1.39731	-0.511875	0.191214	-2.67698	0.00742887	0.0167316
AL645568.1	ENSG00000203739	lncRNA	66.771	-0.391252	0.0679615	-5.75696	8.56419e-09	8.00093e-08
LINC00222	ENSG00000203801	lncRNA	8.72075	-0.490852	0.11703	-4.19425	2.7378e-05	0.000114887
ADAMTSL4-AS1	ENSG00000203804	lncRNA	27.0095	-0.363429	0.113489	-3.20233	0.00136322	0.0037661
BVES-AS1	ENSG00000203808	lncRNA	3.96514	0.324709	0.11734	2.76725	0.00565307	0.013181
LIN28B-AS1	ENSG00000203809	lncRNA	0.184982	-0.410549	0.644805	-0.636703	0.524318
LINC02868	ENSG00000203864	lncRNA	0.120208	-0.206173	0.784513	-0.262804	0.792701
ATP1A1-AS1	ENSG00000203865	lncRNA	169.79	0.126012	0.0555323	2.26916	0.0232584	0.0450176
SNHG5	ENSG00000203875	lncRNA	5670.23	-0.173103	0.0731484	-2.36647	0.0179586	0.0360194
ADD3-AS1	ENSG00000203876	lncRNA	40.772	-0.0656697	0.073843	-0.889315	0.373834	0.459942
SPATA42	ENSG00000203897	lncRNA	1.09575	-0.268509	0.23429	-1.14605	0.251773	0.334219
AL121827.1	ENSG00000203900	lncRNA	3.9134	-0.0288779	0.306066	-0.094352	0.92483	0.942183
LINC00632	ENSG00000203930	lncRNA	13.8796	-0.304293	0.161823	-1.88041	0.0600527	0.101399
AL354984.1	ENSG00000203971	lncRNA	1.0619	-0.183347	0.23105	-0.793539	0.427464	0.512027
AL772363.1	ENSG00000203987	lncRNA	0.308128	-1.00295	0.408903	-2.45279	0.0141754	0.0293473
ARRDC1-AS1	ENSG00000203993	lncRNA	429.46	-0.123873	0.0649366	-1.90759	0.0564438	0.0962554
LINC01270	ENSG00000203999	lncRNA	38.8771	-0.180434	0.0880464	-2.04931	0.040432	0.0723507
COL5A1-AS1	ENSG00000204011	lncRNA	0.817244	0.00277211	0.251585	0.0110186	0.991209	0.993485
SLC12A5-AS1	ENSG00000204044	lncRNA	13.2189	-0.360905	0.128297	-2.81304	0.00490757	0.0116364
AL391421.1	ENSG00000204049	lncRNA	3.55095	-1.45471	0.207843	-6.99909	2.57627e-12	5.17104e-11
LINC00963	ENSG00000204054	lncRNA	4142.29	0.0409075	0.0606325	0.67468	0.499879	0.580263
AL158151.1	ENSG00000204055	lncRNA	40.3954	-0.434641	0.0964676	-4.50556	6.61972e-06	3.20793e-05
TDRG1	ENSG00000204091	lncRNA	1.17644	-0.770777	0.286569	-2.68967	0.00715217	0.0161848
LINC00951	ENSG00000204092	lncRNA	0.357481	0.37646	0.469355	0.802079	0.422507	0.507243
LINC02520	ENSG00000204110	lncRNA	3.83216	-0.420622	0.158069	-2.661	0.00779086	0.0174346
AL162293.1	ENSG00000204117	lncRNA	1.90541	-0.59169	0.249041	-2.37587	0.0175075	0.0352379
LINC00474	ENSG00000204148	lncRNA	0.0797263	-0.430593	0.961514	-0.447828	0.654278
GDF5-AS1	ENSG00000204183	lncRNA	1.44609	-0.543052	0.228447	-2.37715	0.0174471	0.0351334
LINC02731	ENSG00000204241	lncRNA	15.2293	-0.0335797	0.106972	-0.313911	0.753589	0.804409
LINC00587	ENSG00000204250	lncRNA	0.0705697	-0.323409	1.13115	-0.285912	0.774946
PSMB8-AS1	ENSG00000204261	lncRNA	1004.37	-0.284567	0.0502051	-5.66809	1.44397e-08	1.28284e-07
LINC01993	ENSG00000204277	lncRNA	5.08235	0.182747	0.162736	1.12297	0.261451	0.344571
TNRC6C-AS1	ENSG00000204282	lncRNA	281.894	-0.0460563	0.0735949	-0.625808	0.531441	0.609001
LINC01973	ENSG00000204283	lncRNA	3.36083	-0.506117	0.174366	-2.90262	0.00370061	0.0090741
LINC02783	ENSG00000204362	lncRNA	396.151	-0.325913	0.186471	-1.7478	0.0804991	0.129988
PKP4-AS1	ENSG00000204380	lncRNA	54.3148	-0.457364	0.101475	-4.50716	6.57014e-06	3.18559e-05
SNHG32	ENSG00000204387	lncRNA	4728.09	-0.24291	0.0521733	-4.65584	3.22663e-06	1.67867e-05
NOL4L-DT	ENSG00000204393	lncRNA	0.27672	-0.551351	0.551538	-0.999662	0.317474	0.403504
AL359649.1	ENSG00000204398	lncRNA	0.130337	-0.538957	0.6224	-0.865934	0.386527
LINC02872	ENSG00000204446	lncRNA	8.42585	0.11646	0.13793	0.844347	0.398476	0.484035
LINC01854	ENSG00000204460	lncRNA	0.620491	-0.742285	0.472441	-1.57117	0.116143	0.176596
C1orf195	ENSG00000204464	lncRNA	7.14988	-1.32441	0.153558	-8.62483	6.41868e-18	4.13684e-16
PSORS1C3	ENSG00000204528	lncRNA	485.059	0.0266656	0.127874	0.208531	0.834815	0.871184
ACOXL-AS1	ENSG00000204581	lncRNA	7.17408	-0.171088	0.10496	-1.63003	0.103096	0.159927
AC027801.1	ENSG00000204584	lncRNA	44.7864	-0.337914	0.092161	-3.66657	0.00024583	0.000819385
LINC01123	ENSG00000204588	lncRNA	48.227	0.254825	0.0879281	2.8981	0.00375429	0.00918802
LINC01257	ENSG00000204603	lncRNA	1.91941	0.503909	0.273048	1.8455	0.064965	0.108509
AC115618.1	ENSG00000204620	lncRNA	27.0703	-0.00746722	0.0557733	-0.133885	0.893493	0.917829
HCG9	ENSG00000204625	lncRNA	12.218	-0.0743942	0.0891793	-0.834209	0.404163	0.489555
C5orf60	ENSG00000204661	lncRNA	2.61893	-0.31583	0.130743	-2.41566	0.0157066	0.0320883
AC010624.1	ENSG00000204666	lncRNA	9.88063	0.162775	0.113408	1.43531	0.1512	0.219823
FAM153CP	ENSG00000204677	lncRNA	262.969	0.0953923	0.171332	0.556767	0.577686	0.651424
MIR1915HG	ENSG00000204682	lncRNA	287.846	0.465679	0.082408	5.65089	1.59622e-08	1.40313e-07
AL133464.1	ENSG00000204684	lncRNA	0.291099	-0.619437	0.323083	-1.91727	0.0552041	0.0945142
STARD7-AS1	ENSG00000204685	lncRNA	177.562	0.0553823	0.0363677	1.52284	0.127798	0.190924
MAMDC2-AS1	ENSG00000204706	lncRNA	51.8546	-0.269329	0.0895405	-3.0079	0.00263057	0.00672375
LINC01556	ENSG00000204709	lncRNA	10.0094	-0.562678	0.12917	-4.3561	1.324e-05	5.98863e-05
LINC01951	ENSG00000204754	lncRNA	0.49255	-0.798377	0.470654	-1.69631	0.0898265	0.142582
AC008429.1	ENSG00000204758	lncRNA	62.1572	-0.265452	0.0789775	-3.36112	0.000776281	0.0022904
LINC01291	ENSG00000204792	lncRNA	169.038	0.188761	0.195142	0.967303	0.333393	0.419916
AL590399.1	ENSG00000204802	lncRNA	1.72534	-0.523278	0.169475	-3.08765	0.00201747	0.0053174
AL935212.1	ENSG00000204814	lncRNA	0.11705	-0.067088	0.52645	-0.127435	0.898596
ST8SIA6-AS1	ENSG00000204832	lncRNA	9.56871	-0.287347	0.212912	-1.34961	0.177142	0.250614
AC011484.1	ENSG00000204850	lncRNA	0.596489	0.387766	0.189354	2.04784	0.0405759	0.0725628
FAM201A	ENSG00000204860	lncRNA	100.456	0.0458302	0.136299	0.336247	0.736685	0.790101
AC021218.1	ENSG00000204876	lncRNA	407.996	-0.388338	0.147079	-2.64034	0.0082824	0.0183864
LINC01545	ENSG00000204904	lncRNA	7.47185	-0.182618	0.0823898	-2.21652	0.026656	0.0506064
AC007389.1	ENSG00000204929	lncRNA	9.61199	-0.183841	0.108153	-1.69983	0.0891636	0.141672
ATP6V0E2-AS1	ENSG00000204934	lncRNA	98.5903	0.0620586	0.111192	0.55812	0.576762	0.650509
FAM83A-AS1	ENSG00000204949	lncRNA	1.67512	-0.796225	0.269348	-2.95612	0.00311533	0.00780176
BLACE	ENSG00000204960	lncRNA	0.628469	-0.616375	0.228352	-2.69923	0.00694999	0.0158014
AP000812.1	ENSG00000204971	lncRNA	7.56989	-0.121195	0.103398	-1.17212	0.241148	0.322563
AC005692.1	ENSG00000204990	lncRNA	0.336866	-0.897922	0.351831	-2.55214	0.0107062	0.0230276
LINC02138	ENSG00000205015	lncRNA	0.385569	0.264546	0.399938	0.661468	0.508312	0.588219
AC092384.1	ENSG00000205018	lncRNA	5.48692	0.313347	0.096358	3.25191	0.00114633	0.00323219
AC134312.1	ENSG00000205037	lncRNA	2.58181	0.00554611	0.145994	0.0379885	0.969697	0.97744
AC118344.1	ENSG00000205041	lncRNA	24.1332	0.254138	0.112343	2.26216	0.0236876	0.0457094
LINC01121	ENSG00000205054	lncRNA	6.72192	-0.789477	0.21018	-3.75619	0.00017252	0.00059606
LINC02397	ENSG00000205056	lncRNA	12.8762	-0.594713	0.121642	-4.88904	1.01329e-06	5.91125e-06
CLLU1-AS1	ENSG00000205057	lncRNA	3.78714	-1.28129	0.237766	-5.38886	7.09068e-08	5.38934e-07
C2orf91	ENSG00000205086	lncRNA	7.13182	-0.196383	0.133916	-1.46647	0.142521	0.209237
LINC02716	ENSG00000205106	lncRNA	21.4612	-0.411646	0.093095	-4.42178	9.78892e-06	4.55722e-05
C7orf66	ENSG00000205174	lncRNA	0.390182	-0.747193	0.434991	-1.71772	0.0858479	0.137313
LINC00654	ENSG00000205181	lncRNA	209.363	0.172804	0.0864483	1.99893	0.045616	0.0802792
TTLL10-AS1	ENSG00000205231	lncRNA	1.91289	-0.000538522	0.15036	-0.00358155	0.997142	0.997883
LINC01602	ENSG00000205293	lncRNA	0.382308	-0.854424	0.382911	-2.23139	0.0256551	0.0489657
AL356414.1	ENSG00000205300	lncRNA	0.921196	-0.532095	0.357266	-1.48935	0.136395	0.20169
AC005863.1	ENSG00000205325	lncRNA	0.634619	-0.563066	0.349303	-1.61197	0.106969	0.164914
LINC01460	ENSG00000205334	lncRNA	4.8219	-0.170631	0.150579	-1.13316	0.257145	0.339874
LINC00661	ENSG00000205396	lncRNA	1.67188	-0.622161	0.272188	-2.28578	0.0222672	0.0433611
AC007608.1	ENSG00000205414	lncRNA	2.88786	0.0547932	0.189423	0.289264	0.772379	0.819826
PCBP3-AS1	ENSG00000205424	lncRNA	12.8409	-0.529014	0.24143	-2.19117	0.0284393	0.0535122
KU-MEL-3	ENSG00000205444	lncRNA	1.47524	0.422796	0.197155	2.14449	0.0319939	0.0592767
AC140658.1	ENSG00000205452	lncRNA	0.0416699	-0.440922	1.40307	-0.314254	0.753328
CALML3-AS1	ENSG00000205488	lncRNA	12.4526	-0.409283	0.158219	-2.58682	0.00968674	0.0210752
MAPRE3-AS1	ENSG00000205500	lncRNA	6.44684	-1.1017	0.177226	-6.21632	5.08948e-10	6.26095e-09
AC121338.1	ENSG00000205537	lncRNA	3.2135	-0.744633	0.134316	-5.54389	2.95827e-08	2.44208e-07
C9orf92	ENSG00000205549	lncRNA	7.79077	-0.978294	0.134794	-7.25768	3.93779e-13	9.51749e-12
CHKB-DT	ENSG00000205559	lncRNA	29.5094	-0.53801	0.0834348	-6.44826	1.1314e-10	1.58791e-09
AL049775.1	ENSG00000205562	lncRNA	3.59433	0.859326	0.164054	5.23806	1.62271e-07	1.13111e-06
LINC01597	ENSG00000205611	lncRNA	40.4826	0.141601	0.136706	1.03581	0.300292	0.385688
AP001042.1	ENSG00000205622	lncRNA	15.4486	-0.0645465	0.0937058	-0.688821	0.490936	0.571968
LINC01446	ENSG00000205628	lncRNA	2.15925	0.461385	0.307622	1.49984	0.133655	0.198253
LINC01310	ENSG00000205632	lncRNA	0.357501	-0.307919	0.316724	-0.972199	0.330951	0.417447
LINC00898	ENSG00000205634	lncRNA	0.693803	-0.559895	0.403026	-1.38923	0.164764	0.235949
LINC00583	ENSG00000205636	lncRNA	0.0364103	-0.398057	1.40919	-0.282473	0.777581
AL035696.1	ENSG00000205653	lncRNA	0.189012	-0.499352	0.533567	-0.935875	0.349338
AC020741.1	ENSG00000205682	lncRNA	0.676513	-0.723365	0.255358	-2.83275	0.00461497	0.0110196
ADARB2-AS1	ENSG00000205696	lncRNA	0.805668	-0.285165	0.34853	-0.818192	0.413247	0.498275
AL359878.1	ENSG00000205740	lncRNA	28.9852	-0.184599	0.102662	-1.79812	0.0721578	0.118591
AC083864.1	ENSG00000205745	lncRNA	0.768872	-0.532059	0.282459	-1.88367	0.0596098	0.100822
LINC01531	ENSG00000205786	lncRNA	6.8257	-0.458792	0.198195	-2.31486	0.0206207	0.0406209
DPP9-AS1	ENSG00000205790	lncRNA	43.3909	-0.659734	0.11258	-5.86016	4.62418e-09	4.59302e-08
LOH12CR2	ENSG00000205791	lncRNA	73.938	-0.0690069	0.0550852	-1.25273	0.210303	0.288358
AC024132.1	ENSG00000205830	lncRNA	0.174814	-0.443835	0.52896	-0.83907	0.40143
LINC00487	ENSG00000205837	lncRNA	22.3493	-0.0124333	0.113406	-0.109636	0.912698	0.93281
RFPL3S	ENSG00000205853	lncRNA	15.8086	-0.418747	0.112269	-3.72986	0.000191584	0.000654329
PCOTH	ENSG00000205861	lncRNA	11.7573	0.0379644	0.104259	0.364136	0.715756	0.772209
FAM99B	ENSG00000205865	lncRNA	0.165354	-0.185912	0.414035	-0.449025	0.653414
FAM99A	ENSG00000205866	lncRNA	0.265416	-0.549667	0.330429	-1.66349	0.096214	0.151021
C1RL-AS1	ENSG00000205885	lncRNA	1421.69	-0.109057	0.0856402	-1.27343	0.202865	0.280205
AC108134.1	ENSG00000205890	lncRNA	10.2294	-0.0945466	0.15374	-0.614976	0.538571	0.615663
SRRM2-AS1	ENSG00000205913	lncRNA	61.4819	-0.496539	0.0891769	-5.56803	2.57635e-08	2.16225e-07
C21orf62-AS1	ENSG00000205930	lncRNA	80.8177	-0.168951	0.0536971	-3.14637	0.00165312	0.0044626
AC105345.1	ENSG00000205959	lncRNA	45.5963	0.222088	0.0954253	2.32735	0.0199465	0.0394692
AC074389.1	ENSG00000205971	lncRNA	0.787581	-0.78041	0.324399	-2.40571	0.0161413	0.0328488
Z99774.1	ENSG00000206028	lncRNA	2.26562	-0.643033	0.151816	-4.2356	2.27942e-05	9.76277e-05
AL121823.1	ENSG00000206062	lncRNA	0.0806765	-0.430632	0.776877	-0.554312	0.579365
AC006305.1	ENSG00000206129	lncRNA	26.8784	-0.0817251	0.189617	-0.431	0.666469	0.730157
FAM230H	ENSG00000206142	lncRNA	0.0565852	-0.280543	0.861801	-0.325531	0.744779
LINC02346	ENSG00000206187	lncRNA	0.581745	-0.516945	0.312381	-1.65485	0.0979542	0.153243
DUXAP8	ENSG00000206195	lncRNA	162.746	-0.341763	0.122354	-2.79323	0.00521841	0.0122856
AL359555.1	ENSG00000206249	lncRNA	0.945388	-0.0648559	0.206948	-0.313393	0.753982	0.804641
HCP5	ENSG00000206337	lncRNA	4012.73	-0.00558418	0.063338	-0.0881647	0.929746	0.946203
HCG27	ENSG00000206344	lncRNA	202.923	-0.282386	0.10933	-2.58288	0.00979784	0.0212825
H1-10-AS1	ENSG00000206417	lncRNA	89.5785	0.000515093	0.0930899	0.00553328	0.995585	0.996694
KRBOX1-AS1	ENSG00000206552	lncRNA	0.398574	-0.420162	0.280042	-1.50035	0.133523	0.198088
AC022007.1	ENSG00000206567	lncRNA	66.9652	0.189789	0.0915451	2.07317	0.038156	0.0688723
THUMPD3-AS1	ENSG00000206573	lncRNA	435.646	-0.0669296	0.0721908	-0.927122	0.353863	0.440146
AP000553.1	ENSG00000207751	lncRNA	0.0112267	-0.344271	2.89071	-0.119096	0.9052
AL359091.1	ENSG00000207955	lncRNA	0.95073	-0.532385	0.188534	-2.82382	0.00474555	0.011296
AP000346.1	ENSG00000211683	lncRNA	12.2463	-0.22291	0.139002	-1.60364	0.108794	0.167188
AC003035.1	ENSG00000212663	lncRNA	2.95797	-0.404773	0.146256	-2.76755	0.00564788	0.0131702
LINC01089	ENSG00000212694	lncRNA	477.981	-0.267908	0.102358	-2.61735	0.00886152	0.0194798
LINC02693	ENSG00000212719	lncRNA	256.012	0.39245	0.0681421	5.7593	8.44655e-09	7.90714e-08
LINC02656	ENSG00000212743	lncRNA	71.4424	-0.514103	0.105622	-4.86738	1.13089e-06	6.53407e-06
EWSAT1	ENSG00000212766	lncRNA	38.3198	0.595283	0.142806	4.16847	3.06651e-05	0.000127202
TTTY2	ENSG00000212855	lncRNA	0.00606374	-0.301406	2.89071	-0.104267	0.916957
TTTY2B	ENSG00000212856	lncRNA	0.02898	-0.365684	2.76523	-0.132243	0.894792
AC093281.1	ENSG00000212930	lncRNA	2.02395	-0.714785	0.2507	-2.85116	0.00435605	0.0104662
Z97192.1	ENSG00000212939	lncRNA	2.60742	-0.38224	0.192091	-1.98989	0.0466025	0.081714
AC016747.1	ENSG00000212978	lncRNA	808.419	-0.195973	0.0489899	-4.00027	6.32713e-05	0.000243376
C1orf220	ENSG00000213057	lncRNA	34.573	-0.221115	0.10207	-2.1663	0.030288	0.0565298
Z99572.1	ENSG00000213062	lncRNA	17.3042	0.924494	0.121262	7.62393	2.46067e-14	7.55243e-13
AL590867.1	ENSG00000213121	lncRNA	0.302717	-0.650291	0.446406	-1.45673	0.145192	0.212497
Z97192.2	ENSG00000213279	lncRNA	27.7245	-0.31034	0.121099	-2.5627	0.0103863	0.0224163
LINC00671	ENSG00000213373	lncRNA	1174.86	-0.140842	0.187373	-0.751664	0.452253	0.535602
FIRRE	ENSG00000213468	lncRNA	29.0475	-0.714251	0.146205	-4.88527	1.0329e-06	6.01568e-06
SLX1A-SULT1A3	ENSG00000213599	lncRNA	4.49311	0.101815	0.129531	0.786031	0.431849	0.516241
U73169.1	ENSG00000213600	lncRNA	5.57259	-0.342638	0.13209	-2.59397	0.00948738	0.0206866
ZNF337-AS1	ENSG00000213742	lncRNA	92.9923	-0.101865	0.0619954	-1.64311	0.10036	0.156393
LINC01521	ENSG00000213888	lncRNA	67.2346	0.476692	0.0539656	8.83327	1.01662e-18	7.53815e-17
LIPE-AS1	ENSG00000213904	lncRNA	76.6944	-0.514648	0.0758146	-6.78824	1.13508e-11	1.97923e-10
AC019080.1	ENSG00000213963	lncRNA	212.523	-0.0201584	0.0528659	-0.381312	0.702972	0.761086
AC007277.1	ENSG00000213981	lncRNA	5.80566	-0.497981	0.139735	-3.56376	0.000365579	0.001168
AL157395.1	ENSG00000213994	lncRNA	15.0942	-0.368034	0.0889706	-4.13659	3.52511e-05	0.000144247
LINC02418	ENSG00000214039	lncRNA	1.92542	-0.241842	0.230361	-1.04984	0.293792	0.379018
LINC02347	ENSG00000214043	lncRNA	0.441009	-0.428968	0.437941	-0.979511	0.327328	0.413721
UCA1	ENSG00000214049	lncRNA	7.05654	-0.347821	0.237172	-1.46654	0.142502	0.209215
PAXIP1-AS2	ENSG00000214106	lncRNA	509.997	0.14908	0.0480904	3.1	0.00193523	0.00512335
LINC00887	ENSG00000214145	lncRNA	2442.92	-0.317241	0.121046	-2.62084	0.0087714	0.0193101
LINC02026	ENSG00000214146	lncRNA	7.59735	-0.578872	0.112103	-5.16375	2.42052e-07	1.62541e-06
GCC2-AS1	ENSG00000214184	lncRNA	16.0001	0.01108	0.0793346	0.139662	0.888927	0.914016
ST7-OT4	ENSG00000214188	lncRNA	14.5927	-0.880859	0.120032	-7.33857	2.15892e-13	5.50225e-12
AC010336.1	ENSG00000214248	lncRNA	4.42885	-0.113514	0.104883	-1.08228	0.279126	0.363351
APTR	ENSG00000214293	lncRNA	745.081	-0.499503	0.0551067	-9.06429	1.25414e-19	1.14481e-17
VAC14-AS1	ENSG00000214353	lncRNA	29.4398	-0.791531	0.132683	-5.96557	2.43775e-09	2.58462e-08
LINC00488	ENSG00000214381	lncRNA	22.8189	-0.87731	0.240195	-3.6525	0.000259702	0.000860801
KANSL1-AS1	ENSG00000214401	lncRNA	180.896	-0.723878	0.0971449	-7.45153	9.22621e-14	2.51207e-12
LINC02085	ENSG00000214407	lncRNA	0.385364	0.218375	0.320135	0.682135	0.495154	0.575966
VPS33B-DT	ENSG00000214432	lncRNA	12.1758	-0.337962	0.082675	-4.08783	4.35419e-05	0.000173985
AC087491.1	ENSG00000214546	lncRNA	3.12431	-0.66116	0.178505	-3.70386	0.000212339	0.000717887
MEG3	ENSG00000214548	lncRNA	478.427	0.0810432	0.137305	0.590243	0.555028	0.630856
AC019077.1	ENSG00000214559	lncRNA	2.55706	-0.19245	0.114346	-1.68305	0.0923654	0.14596
AC142086.1	ENSG00000214614	lncRNA	0.0440219	-0.387489	1.10517	-0.350614	0.725878
AC073592.1	ENSG00000214650	lncRNA	12.5137	-0.640375	0.147484	-4.34199	1.41196e-05	6.34268e-05
LINC01913	ENSG00000214691	lncRNA	0.640122	-0.700871	0.333913	-2.09896	0.0358203	0.0652526
AC116407.1	ENSG00000214708	lncRNA	21.5331	-0.39179	0.10722	-3.65408	0.000258105	0.000856005
AC005562.1	ENSG00000214719	lncRNA	133.791	0.211322	0.0365934	5.77487	7.70136e-09	7.27622e-08
AL161756.1	ENSG00000214770	lncRNA	13.7764	-0.258707	0.108163	-2.39182	0.0167649	0.0339611
AC010168.1	ENSG00000214772	lncRNA	8.3788	-0.297493	0.113765	-2.61499	0.00892309	0.0195895
AC112512.1	ENSG00000214773	lncRNA	3.85366	-1.26638	0.180117	-7.03088	2.05238e-12	4.23069e-11
POLR2J4	ENSG00000214783	lncRNA	168.418	-0.246997	0.0745095	-3.31497	0.000916527	0.00265665
AP000790.1	ENSG00000214788	lncRNA	4.32594	-0.807595	0.1955	-4.13093	3.61304e-05	0.000147469
AP002358.1	ENSG00000214797	lncRNA	0.679747	-0.634039	0.210072	-3.01819	0.00254287	0.00652251
AC090921.1	ENSG00000214803	lncRNA	3.68356	-0.0114348	0.113602	-0.100657	0.919823	0.938209
LINC00612	ENSG00000214851	lncRNA	9.6637	-0.383425	0.100804	-3.80366	0.000142571	0.000502089
AC004540.1	ENSG00000214870	lncRNA	242.016	-0.368296	0.0680512	-5.41205	6.2309e-08	4.79071e-07
LINC00243	ENSG00000214894	lncRNA	8.64617	-0.580882	0.109387	-5.31033	1.09427e-07	7.9279e-07
LINC01588	ENSG00000214900	lncRNA	97.1713	-0.417292	0.0942819	-4.426	9.59948e-06	4.47767e-05
BX546450.1	ENSG00000214915	lncRNA	0.336983	-0.823168	0.285157	-2.88672	0.00389285	0.00948276
AC104472.1	ENSG00000214919	lncRNA	2.10973	-0.819159	0.191796	-4.27099	1.94606e-05	8.45751e-05
HLA-F-AS1	ENSG00000214922	lncRNA	264.402	-0.154535	0.0564564	-2.73724	0.00619571	0.0142705
AC113167.1	ENSG00000214942	lncRNA	0.414304	-0.357136	0.32083	-1.11316	0.265638	0.348955
AP000317.1	ENSG00000214955	lncRNA	12.4646	-0.475886	0.0975641	-4.87767	1.07346e-06	6.22661e-06
AC005323.1	ENSG00000214970	lncRNA	1.70424	0.295625	0.302119	0.978505	0.327824	0.414214
AC129492.1	ENSG00000214999	lncRNA	70.0121	-0.0247985	0.116305	-0.213218	0.831157	0.868197
AL645728.1	ENSG00000215014	lncRNA	33.7491	-0.13785	0.0497774	-2.76934	0.00561703	0.013105
AL008729.1	ENSG00000215022	lncRNA	67.8791	-0.44344	0.0889111	-4.98745	6.11807e-07	3.74805e-06
AC131097.1	ENSG00000215023	lncRNA	1.63862	-0.362237	0.20722	-1.74808	0.0804506	0.129928
CD27-AS1	ENSG00000215039	lncRNA	1223.55	-0.142538	0.0497481	-2.86519	0.00416765	0.010061
ALOX12-AS1	ENSG00000215067	lncRNA	232.895	-0.080342	0.0452823	-1.77425	0.0760221	0.123915
AC025171.2	ENSG00000215068	lncRNA	190.604	0.0245422	0.0661373	0.37108	0.710578	0.767635
FAM74A1	ENSG00000215112	lncRNA	0.102318	-0.13109	1.173	-0.111756	0.911017
LINC00588	ENSG00000215117	lncRNA	3.45847	-0.586609	0.665871	-0.880965	0.378337	0.464236
LINC00269	ENSG00000215162	lncRNA	1.68447	-0.606636	0.215306	-2.81756	0.00483902	0.0114893
BASP1-AS1	ENSG00000215196	lncRNA	3.10923	-0.35984	0.175745	-2.04751	0.0406077	0.0726111
LINC01020	ENSG00000215231	lncRNA	3.3159	0.953832	0.201699	4.72897	2.25656e-06	1.21767e-05
LINC02449	ENSG00000215241	lncRNA	41.7863	-0.0817053	0.0958941	-0.852036	0.394194	0.479967
LINC02649	ENSG00000215244	lncRNA	87.0619	-0.277173	0.0982907	-2.81993	0.00480343	0.0114136
AC116351.1	ENSG00000215246	lncRNA	314.564	-0.352572	0.14764	-2.38805	0.016938	0.0342617
DHRS4-AS1	ENSG00000215256	lncRNA	1418.07	0.0520438	0.0539736	0.964246	0.334923	0.421426
AC135983.2	ENSG00000215304	lncRNA	1.83741	0.0795875	0.153748	0.51765	0.604702	0.675933
FAM66B	ENSG00000215374	lncRNA	26.76	-0.0280138	0.0855018	-0.32764	0.743184	0.795693
MIR99AHG	ENSG00000215386	lncRNA	235.285	0.0408599	0.085951	0.475386	0.634512	0.702333
LL22NC01-81G9.3	ENSG00000215403	lncRNA	0.47855	-0.201206	0.269467	-0.746681	0.455256	0.538407
MIR17HG	ENSG00000215417	lncRNA	42.8836	-0.166491	0.143818	-1.15765	0.247005	0.328996
MCM3AP-AS1	ENSG00000215424	lncRNA	198.87	-0.124001	0.0690602	-1.79554	0.0725672	0.119151
AATBC	ENSG00000215458	lncRNA	40.9216	0.0802243	0.0955636	0.839486	0.401197	0.486682
BCRP3	ENSG00000215481	lncRNA	158.521	-0.262119	0.117485	-2.23109	0.0256753	0.0489996
LINC00598	ENSG00000215483	lncRNA	12.2772	-0.0781067	0.112576	-0.69381	0.487801	0.568938
FAM230B	ENSG00000215498	lncRNA	0.10454	-0.366631	0.601467	-0.609562	0.542152
LINC00189	ENSG00000215533	lncRNA	20.6902	-0.965762	0.170748	-5.65607	1.54875e-08	1.36533e-07
TTTY5	ENSG00000215560	lncRNA	0.112176	-0.47326	1.47726	-0.320365	0.748692
AC114730.1	ENSG00000215692	lncRNA	1.30291	0.0153407	0.145274	0.105598	0.915901	0.935374
AC245128.1	ENSG00000215765	lncRNA	0.817712	-0.752874	0.311548	-2.41656	0.0156681	0.0320296
ARHGAP27P1-BPTFP1-KPNA2P3	ENSG00000215769	lncRNA	228.928	-0.124317	0.0995754	-1.24847	0.211858	0.290117
LINC01139	ENSG00000215808	lncRNA	950.631	0.137127	0.180794	0.758472	0.448168	0.531658
AP002761.1	ENSG00000215841	lncRNA	1.12182	-0.675157	0.201355	-3.35307	0.000799219	0.00235052
LINC01356	ENSG00000215866	lncRNA	16.8631	-0.250481	0.0990956	-2.52767	0.0114821	0.0244542
LINC02337	ENSG00000215881	lncRNA	0.0397998	-0.280306	1.404	-0.199648	0.841756
LINC00955	ENSG00000216560	lncRNA	9.3781	-0.604557	0.22386	-2.7006	0.00692143	0.0157411
LY86-AS1	ENSG00000216863	lncRNA	5.72555	-0.737199	0.14203	-5.19046	2.09781e-07	1.42859e-06
AC009403.1	ENSG00000216895	lncRNA	245.63	-0.487977	0.0579419	-8.42183	3.70641e-17	2.04138e-15
AC073316.1	ENSG00000217455	lncRNA	4.97641	-0.742926	0.207917	-3.57319	0.000352663	0.00113026
AL158066.1	ENSG00000217576	lncRNA	0.434775	0.121992	0.39178	0.311378	0.755513	0.805956
AC073263.1	ENSG00000217702	lncRNA	8.60941	-0.386432	0.148011	-2.61084	0.00903214	0.0198014
AC099552.1	ENSG00000217825	lncRNA	0.40317	-0.652042	0.324604	-2.00873	0.0445657	0.0786876
RBM38-AS1	ENSG00000218018	lncRNA	9.73781	-0.240884	0.099582	-2.41895	0.0155653	0.0318507
KIRREL3-AS3	ENSG00000218109	lncRNA	0.376869	-0.33891	0.428489	-0.790943	0.428977	0.513423
LINC01644	ENSG00000218357	lncRNA	2.6421	0.809743	0.191578	4.22671	2.37135e-05	0.000101149
AC110619.1	ENSG00000218416	lncRNA	12.0182	-0.838677	0.162776	-5.15234	2.57257e-07	1.71894e-06
LINC00339	ENSG00000218510	lncRNA	722.006	-0.160135	0.0383023	-4.1808	2.90482e-05	0.000121153
MIF-AS1	ENSG00000218537	lncRNA	82.0857	-0.206978	0.0746732	-2.77178	0.00557506	0.0130216
AC008060.1	ENSG00000218672	lncRNA	16.672	-2.63503	0.304235	-8.66118	4.66922e-18	3.09194e-16
FAM138C	ENSG00000218839	lncRNA	0.243886	-0.495394	0.701965	-0.705724	0.48036	0.562233
AC011298.1	ENSG00000219159	lncRNA	1.46652	0.0194346	0.426186	0.0456012	0.963628	0.972799
AC125494.1	ENSG00000219410	lncRNA	13.9476	-0.206256	0.0980122	-2.10439	0.0353441	0.0645391
AC019155.2	ENSG00000219445	lncRNA	0.594124	-0.936395	0.292541	-3.2009	0.00136999	0.00378343
ZNF433-AS1	ENSG00000219665	lncRNA	126.319	-0.286443	0.0640669	-4.47099	7.78578e-06	3.71448e-05
LINC02076	ENSG00000220161	lncRNA	20.9219	-0.527868	0.120798	-4.36985	1.24334e-05	5.66011e-05
AC093802.1	ENSG00000220256	lncRNA	1.7841	-0.182152	0.236388	-0.770566	0.440964	0.524905
HTR5A-AS1	ENSG00000220575	lncRNA	0.111863	-0.409452	0.617434	-0.66315	0.507234
Z85994.1	ENSG00000220702	lncRNA	0.599846	-0.463507	0.291217	-1.59162	0.111471	0.170734
LL22NC03-63E9.3	ENSG00000220891	lncRNA	3.07345	-1.00731	0.239798	-4.20064	2.66163e-05	0.000112122
LINC02531	ENSG00000220908	lncRNA	0.112123	-0.302844	0.599048	-0.505542	0.613178
IGBP1-AS2	ENSG00000220925	lncRNA	2.31968	-0.826899	0.161854	-5.10891	3.24015e-07	2.122e-06
RNU6ATAC35P	ENSG00000221571	lncRNA	3.83122	-0.188782	0.115791	-1.63036	0.103025	0.159839
PPP3CB-AS1	ENSG00000221817	lncRNA	246.599	0.0142364	0.0395963	0.359537	0.719193	0.775114
GAS8-AS1	ENSG00000221819	lncRNA	10.2543	0.184232	0.122577	1.50299	0.132841	0.19723
C7orf65	ENSG00000221845	lncRNA	3.06266	-0.378582	0.143423	-2.63962	0.00829989	0.018419
AC020907.2	ENSG00000221857	lncRNA	0.268205	-0.217839	0.321192	-0.67822	0.497632	0.578284
ARIH2OS	ENSG00000221883	lncRNA	58.8901	0.00856698	0.0598326	0.143182	0.886146	0.911917
LINC01465	ENSG00000221949	lncRNA	45.7903	-0.398485	0.0653977	-6.09326	1.10636e-09	1.26618e-08
C1orf229	ENSG00000221953	lncRNA	39.9979	0.0206285	0.0714735	0.288618	0.772874	0.820198
EXOC3-AS1	ENSG00000221990	lncRNA	333.044	-0.126189	0.0803877	-1.56975	0.116473	0.177018
AC092675.1	ENSG00000222000	lncRNA	2.98072	-0.239201	0.231976	-1.03114	0.302474	0.387947
AC106876.1	ENSG00000222001	lncRNA	6.76118	-0.54778	0.148997	-3.67646	0.000236495	0.000792422
LINC02860	ENSG00000222004	lncRNA	3.77555	-0.921615	0.153776	-5.99324	2.05698e-09	2.21682e-08
LINC01118	ENSG00000222005	lncRNA	6.41478	-0.55135	0.116538	-4.73108	2.23328e-06	1.20653e-05
AC064874.1	ENSG00000222007	lncRNA	0.820051	-0.840913	0.215498	-3.90219	9.53272e-05	0.00035126
AC005481.1	ENSG00000222012	lncRNA	5.08426	0.522885	0.141342	3.69944	0.000216073	0.000729594
AC011997.1	ENSG00000222017	lncRNA	2.16329	-0.610957	0.168635	-3.62295	0.000291261	0.000953067
HDAC4-AS1	ENSG00000222020	lncRNA	24.5172	-0.254047	0.0947971	-2.67991	0.00736426	0.0166024
AC112721.1	ENSG00000222022	lncRNA	1.56024	-0.265461	0.211486	-1.25522	0.2094	0.28737
LINC01793	ENSG00000222030	lncRNA	0.865496	-0.971007	0.278956	-3.48086	0.0004998	0.00154446
AC023469.1	ENSG00000222031	lncRNA	0.148146	-0.28102	0.855949	-0.328313	0.742675
AC112721.2	ENSG00000222032	lncRNA	2.7276	-0.191152	0.198081	-0.965021	0.334534	0.42103
LINC01124	ENSG00000222033	lncRNA	19.4028	-0.0142264	0.177194	-0.0802872	0.936009	0.951246
KIAA2012-AS1	ENSG00000222035	lncRNA	2.31278	-0.252303	0.162789	-1.54987	0.121172	0.182717
CYTOR	ENSG00000222041	lncRNA	1051.29	-0.406652	0.0803256	-5.06255	4.13687e-07	2.64243e-06
AP001341.1	ENSG00000222042	lncRNA	3.30549	-0.740525	0.220069	-3.36496	0.000765543	0.00226207
AC079305.1	ENSG00000222043	lncRNA	8.544	-0.100992	0.0832458	-1.21318	0.225063	0.304847
AL031587.1	ENSG00000222044	lncRNA	2.6341	-0.237576	0.144512	-1.64398	0.10018	0.156154
C10orf55	ENSG00000222047	lncRNA	27.4578	0.0691293	0.0962497	0.718229	0.472616	0.554843
AL158817.1	ENSG00000223342	lncRNA	0.357081	-0.599511	0.379821	-1.5784	0.114473	0.174499
AC137630.1	ENSG00000223343	lncRNA	6.59785	0.345574	0.0766696	4.50731	6.56554e-06	3.1837e-05
AL359081.1	ENSG00000223344	lncRNA	0.252876	-0.527954	0.675919	-0.781092	0.434749	0.518854
ZNF385D-AS2	ENSG00000223351	lncRNA	0.155143	-0.59269	0.696018	-0.851544	0.394467
AL590666.1	ENSG00000223356	lncRNA	6.01751	0.0262312	0.123966	0.2116	0.832419	0.8692
EHHADH-AS1	ENSG00000223358	lncRNA	0.568214	-0.321012	0.227195	-1.41294	0.157675	0.227535
AC096559.1	ENSG00000223360	lncRNA	0.129085	-0.366692	0.764096	-0.479903	0.631296
AC108066.1	ENSG00000223373	lncRNA	0.268116	-0.731618	0.516882	-1.41544	0.156938	0.226691
AC005104.1	ENSG00000223374	lncRNA	29.6441	-0.055506	0.104945	-0.528907	0.59687	0.668712
AL391987.3	ENSG00000223379	lncRNA	0.0933491	-0.334333	0.722345	-0.462845	0.643476
LINC02661	ENSG00000223381	lncRNA	0.133609	-0.356015	0.562766	-0.632617	0.526983
LINC01778	ENSG00000223382	lncRNA	2.51119	-0.182755	0.164922	-1.10813	0.267805	0.351299
LINC02068	ENSG00000223387	lncRNA	43.5828	0.0439808	0.116149	0.378659	0.704941	0.762858
AL445685.1	ENSG00000223390	lncRNA	1.49903	-0.457924	0.177387	-2.5815	0.00983727	0.021357
CLDN10-AS1	ENSG00000223392	lncRNA	11.1691	-0.359598	0.143358	-2.50839	0.0121283	0.0256208
AL118511.1	ENSG00000223393	lncRNA	4.85322	0.288597	0.116712	2.47273	0.0134087	0.0279608
AP006748.1	ENSG00000223400	lncRNA	0.0307731	-0.365878	1.56447	-0.233868	0.815088
MEG9	ENSG00000223403	lncRNA	9.38881	-0.34654	0.181638	-1.90786	0.0564098	0.0962118
LINC00397	ENSG00000223404	lncRNA	0.89311	-1.20001	0.337639	-3.55413	0.000379233	0.00120717
AL009050.1	ENSG00000223410	lncRNA	0.371872	-0.284889	0.36858	-0.772935	0.439561	0.523425
AC011243.1	ENSG00000223430	lncRNA	0.313623	-0.927825	0.397685	-2.33306	0.0196448	0.0389496
AC009988.1	ENSG00000223432	lncRNA	0.461668	-0.522866	0.462198	-1.13126	0.257946	0.340715
AC011625.1	ENSG00000223436	lncRNA	0.146631	-0.228036	0.559989	-0.407215	0.68385
AC235097.1	ENSG00000223438	lncRNA	0.117693	-0.430791	0.813392	-0.529623	0.596373
AL589642.1	ENSG00000223440	lncRNA	0.119316	-0.345298	0.744545	-0.46377	0.642812
TH2LCRR	ENSG00000223442	lncRNA	14.4941	-0.6878	0.119611	-5.75031	8.90804e-09	8.27828e-08
AL451065.1	ENSG00000223446	lncRNA	0.104224	-0.462992	0.70829	-0.653676	0.513321
LMO7DN-IT1	ENSG00000223458	lncRNA	0.589858	0.721741	0.267236	2.70076	0.00691809	0.0157351
AC004471.1	ENSG00000223461	lncRNA	7.9726	-0.0712732	0.0968793	-0.735691	0.461919	0.54493
AL353801.1	ENSG00000223462	lncRNA	30.0015	0.278344	0.135849	2.04891	0.0404704	0.0724081
LINC01825	ENSG00000223466	lncRNA	1.32396	0.0780856	0.192901	0.404795	0.685628	0.746435
AL157371.1	ENSG00000223469	lncRNA	0.16206	-0.46396	0.543538	-0.853592	0.393331
LINC02629	ENSG00000223470	lncRNA	0.505235	-1.32128	0.283626	-4.65852	3.18485e-06	1.65995e-05
AC099681.1	ENSG00000223475	lncRNA	1.08234	-0.172581	0.183177	-0.942151	0.346116	0.432619
AL441992.1	ENSG00000223478	lncRNA	78.3025	-0.269288	0.0538043	-5.00495	5.58754e-07	3.45584e-06
LINC02238	ENSG00000223479	lncRNA	0.06502	-0.419747	0.992052	-0.42311	0.672215
NUTM2A-AS1	ENSG00000223482	lncRNA	491.428	-0.021708	0.0418794	-0.518345	0.604218	0.675573
LINC01615	ENSG00000223485	lncRNA	43.7255	-0.246121	0.136763	-1.79961	0.0719216	0.118241
AC092198.1	ENSG00000223486	lncRNA	1.51624	-0.0608454	0.150628	-0.403944	0.686254	0.74694
FRMPD4-AS1	ENSG00000223487	lncRNA	0.0274894	-0.344426	1.75769	-0.195954	0.844646
AL391097.1	ENSG00000223492	lncRNA	0.679882	-1.52703	0.362537	-4.21206	2.53052e-05	0.000107171
AL731537.1	ENSG00000223502	lncRNA	1.93226	-0.298941	0.174771	-1.71048	0.0871774	0.139037
AL646090.1	ENSG00000223504	lncRNA	0.355385	-0.712081	0.41107	-1.73226	0.0832271	0.133747
AL683807.1	ENSG00000223511	lncRNA	24.2201	-0.541938	0.135189	-4.00876	6.10397e-05	0.000235544
AFF2-IT1	ENSG00000223516	lncRNA	0.197585	-0.795068	0.57938	-1.37227	0.169978
AC010723.1	ENSG00000223517	lncRNA	0.0113109	-0.333584	2.75813	-0.120946	0.903734
AC093690.1	ENSG00000223522	lncRNA	29.4943	-0.900474	0.107719	-8.35949	6.29903e-17	3.30259e-15
AC092598.1	ENSG00000223523	lncRNA	3.70479	-0.387303	0.176577	-2.1934	0.0282787	0.053259
RABGAP1L-IT1	ENSG00000223525	lncRNA	1.25507	-1.47314	0.244417	-6.02716	1.6687e-09	1.83726e-08
AL359094.1	ENSG00000223528	lncRNA	6.43294	-0.69852	0.143599	-4.86438	1.14816e-06	6.62304e-06
AC012506.1	ENSG00000223530	lncRNA	0.269433	-0.187186	0.351018	-0.533265	0.59385	0.665898
HLA-DQB1-AS1	ENSG00000223534	lncRNA	152.227	-0.249641	0.110235	-2.26462	0.0235358	0.0454777
AC008164.1	ENSG00000223536	lncRNA	0.0570561	-0.355469	0.99531	-0.357143	0.720984
AL109947.1	ENSG00000223537	lncRNA	5.04581	-0.320601	0.142952	-2.24272	0.0249147	0.0477475
AL024497.1	ENSG00000223542	lncRNA	0.571379	-0.906017	0.340043	-2.66442	0.0077121	0.0172786
LINC00630	ENSG00000223546	lncRNA	97.6419	0.00423755	0.0631884	0.0670621	0.946532	0.959624
ACSL6-AS1	ENSG00000223548	lncRNA	0.29869	-0.497451	0.525812	-0.946063	0.344117	0.430524
CCR5AS	ENSG00000223552	lncRNA	43.4811	-0.486152	0.0914455	-5.31631	1.05895e-07	7.70489e-07
AC078851.1	ENSG00000223554	lncRNA	0.012857	-0.280072	2.72287	-0.102859	0.918075
AC005165.1	ENSG00000223561	lncRNA	7.02637	0.190144	0.104994	1.81099	0.070142	0.115739
AP001599.1	ENSG00000223563	lncRNA	0.737662	-0.424446	0.237097	-1.79018	0.0734254	0.120351
DHRSX-IT1	ENSG00000223571	lncRNA	8.89009	-0.201612	0.0940091	-2.1446	0.0319851	0.0592627
AL355001.1	ENSG00000223576	lncRNA	3.83839	-0.502277	0.140665	-3.57073	0.000355986	0.00114011
LINC02665	ENSG00000223581	lncRNA	0.0702551	-0.387687	0.907702	-0.427109	0.6693
LINC01312	ENSG00000223586	lncRNA	0.308773	-0.662636	0.423371	-1.56514	0.11755	0.178305
LINC01986	ENSG00000223587	lncRNA	0.0377012	-0.312445	1.55165	-0.201363	0.840415
LINC02142	ENSG00000223597	lncRNA	0.0455642	-0.483788	1.18465	-0.40838	0.682995
AL138733.1	ENSG00000223598	lncRNA	2.71549	-0.66999	0.170598	-3.9273	8.59064e-05	0.000320151
DSCR4-IT1	ENSG00000223608	lncRNA	0.141616	-0.0672874	1.03112	-0.0652568	0.94797
LINC00370	ENSG00000223617	lncRNA	0.374338	-1.01707	0.569328	-1.78644	0.0740281	0.121222
AL133268.2	ENSG00000223623	lncRNA	0.133956	-0.324066	0.672054	-0.482202	0.629663
LINC01044	ENSG00000223626	lncRNA	0.326283	-0.488597	0.326803	-1.49508	0.134893	0.199797
LINC01120	ENSG00000223631	lncRNA	0.370558	-1.15492	0.36028	-3.20563	0.00134769	0.00372857
AC012506.2	ENSG00000223634	lncRNA	3.07483	0.113693	0.187021	0.607915	0.543244	0.619953
AL121990.1	ENSG00000223635	lncRNA	0.512756	-0.165969	0.260495	-0.637129	0.524041	0.602434
TTTY17C	ENSG00000223641	lncRNA	0.00151954	-0.301366	2.89071	-0.104253	0.916968
AC008277.1	ENSG00000223642	lncRNA	2.94279	-0.566447	0.151663	-3.73491	0.00018778	0.000642967
BX284668.1	ENSG00000223643	lncRNA	0.0927112	-0.109596	0.743063	-0.147493	0.882743
AC002463.1	ENSG00000223646	lncRNA	0.285451	-0.757411	0.403086	-1.87903	0.0602404	0.101682
LINC01946	ENSG00000223647	lncRNA	0.93151	-1.29026	0.28683	-4.49834	6.84851e-06	3.3104e-05
AC105275.1	ENSG00000223649	lncRNA	0
AC106786.1	ENSG00000223652	lncRNA	8.79681	0.0682818	0.11661	0.585555	0.558174	0.633835
AL078459.1	ENSG00000223653	lncRNA	36.5507	-0.999445	0.116907	-8.54904	1.24112e-17	7.48328e-16
AC245052.1	ENSG00000223660	lncRNA	0.603515	-0.224786	0.209406	-1.07344	0.283073	0.36759
SAMSN1-AS1	ENSG00000223662	lncRNA	0.699504	-0.430746	0.259706	-1.65859	0.0971981	0.152289
AC000058.1	ENSG00000223665	lncRNA	0.508686	-0.442663	0.279127	-1.58588	0.112766	0.172408
AL357033.2	ENSG00000223669	lncRNA	7.74814	0.678019	0.176419	3.84323	0.000121427	0.00043532
AC093117.1	ENSG00000223675	lncRNA	1.03278	-0.642726	0.204251	-3.14675	0.00165094	0.00445841
LINC00571	ENSG00000223685	lncRNA	42.8217	-0.184613	0.0963252	-1.91656	0.0552941	0.0946436
DIP2A-IT1	ENSG00000223692	lncRNA	2.76706	-0.843141	0.171338	-4.92091	8.61413e-07	5.10718e-06
FO393418.1	ENSG00000223695	lncRNA	3.13001	-0.0134893	0.131691	-0.102431	0.918414	0.937273
AF230666.1	ENSG00000223697	lncRNA	15.4988	-0.358171	0.0792432	-4.5199	6.18698e-06	3.01577e-05
RAET1E-AS1	ENSG00000223701	lncRNA	1.78941	-0.314049	0.146036	-2.15049	0.0315167	0.0585131
LINC01422	ENSG00000223704	lncRNA	33.9865	-0.238687	0.103512	-2.30589	0.021117	0.041463
AC069213.1	ENSG00000223711	lncRNA	7.13794	0.165624	0.0839018	1.97402	0.0483789	0.0844057
LINC02601	ENSG00000223714	lncRNA	5.94458	-0.334404	0.111777	-2.99171	0.00277418	0.00704522
LINC01208	ENSG00000223715	lncRNA	1.42446	-1.16312	0.243595	-4.77482	1.79872e-06	9.91274e-06
AL135785.1	ENSG00000223716	lncRNA	1.91757	-0.438792	0.208345	-2.10608	0.0351975	0.0643149
AL109659.1	ENSG00000223720	lncRNA	0.496702	-0.956306	0.312353	-3.06162	0.00220143	0.00573823
AC009226.1	ENSG00000223725	lncRNA	8.87221	-0.270179	0.0972775	-2.7774	0.00547954	0.0128253
AL020994.1	ENSG00000223726	lncRNA	1.70599	1.11922	0.415317	2.69485	0.00704202	0.0159726
AC034195.1	ENSG00000223727	lncRNA	8.23862	-0.624128	0.146412	-4.26281	2.01872e-05	8.73935e-05
LINC02247	ENSG00000223729	lncRNA	0.365944	-0.372758	0.349216	-1.06742	0.285784	0.37046
AL359706.1	ENSG00000223732	lncRNA	0.197053	-0.380614	0.384885	-0.988903	0.322711
LAPTM4A-DT	ENSG00000223734	lncRNA	1.60363	-0.405464	0.155513	-2.60727	0.00912683	0.0199889
AC112495.1	ENSG00000223742	lncRNA	0.362956	-0.358569	0.42653	-0.840666	0.400535	0.486022
CCDC18-AS1	ENSG00000223745	lncRNA	663.446	-0.207743	0.086592	-2.3991	0.0164354	0.0333734
MIR503HG	ENSG00000223749	lncRNA	310.19	-0.312705	0.117858	-2.65323	0.0079726	0.0177918
AC116609.1	ENSG00000223751	lncRNA	12.2055	-0.232186	0.238276	-0.97444	0.329838	0.416343
AC008073.1	ENSG00000223754	lncRNA	2.14291	-0.0603451	0.130399	-0.462771	0.643528	0.710152
AL138767.2	ENSG00000223761	lncRNA	0.0382327	-0.280384	1.03716	-0.270338	0.7869
LINC02593	ENSG00000223764	lncRNA	308.491	-0.0232579	0.141285	-0.164617	0.869246	0.898837
LINC01626	ENSG00000223765	lncRNA	0.34231	-0.253947	0.37997	-0.668334	0.50392	0.583981
LINC00205	ENSG00000223768	lncRNA	243.981	0.155489	0.0578106	2.68963	0.00715312	0.0161853
CACNA2D1-AS1	ENSG00000223770	lncRNA	2.55897	-0.48149	0.252503	-1.90687	0.0565374	0.0963827
AL513217.1	ENSG00000223774	lncRNA	2.78191	-0.00665453	0.149594	-0.044484	0.964519	0.973591
LGALS8-AS1	ENSG00000223776	lncRNA	10.4542	-0.0645698	0.085988	-0.750917	0.452703	0.536037
LINC01983	ENSG00000223783	lncRNA	0.735598	0.703922	0.29503	2.38593	0.0170358	0.0344338
LINP1	ENSG00000223784	lncRNA	108.451	-0.743632	0.106806	-6.96248	3.34343e-12	6.56706e-11
AL357507.1	ENSG00000223786	lncRNA	5.34992	-1.72697	0.34702	-4.97658	6.47183e-07	3.94526e-06
UBE2E1-AS1	ENSG00000223791	lncRNA	2.60354	0.0925886	0.111083	0.83351	0.404557	0.489929
AL669970.1	ENSG00000223795	lncRNA	0.484104	-0.255267	0.368121	-0.693433	0.488038	0.569184
ENTPD3-AS1	ENSG00000223797	lncRNA	167.431	-0.129023	0.0613934	-2.10157	0.0355905	0.0649089
IL10RB-DT	ENSG00000223799	lncRNA	89.168	-0.228643	0.055176	-4.14388	3.41472e-05	0.000140199
AL355314.1	ENSG00000223800	lncRNA	0.0296466	-0.333778	1.4221	-0.234708	0.814435
LINC00114	ENSG00000223806	lncRNA	1.42491	0.304605	0.180768	1.68506	0.0919772	0.145442
AC044784.1	ENSG00000223808	lncRNA	0.450181	-1.17643	0.463579	-2.53772	0.0111577	0.0238486
AC234771.1	ENSG00000223809	lncRNA	0.0323801	-0.398058	1.85314	-0.214802	0.829922
AL589684.1	ENSG00000223811	lncRNA	0.237574	0.340926	0.376027	0.906652	0.364591	0.450542
AC073365.1	ENSG00000223812	lncRNA	1.37045	0.738734	0.252823	2.92194	0.00347858	0.00859822
AC007255.1	ENSG00000223813	lncRNA	9.44642	0.134647	0.128676	1.0464	0.295374	0.380604
AL691459.1	ENSG00000223814	lncRNA	0
DIAPH3-AS2	ENSG00000223815	lncRNA	0.127799	-0.388186	0.760864	-0.510192	0.609917
CDH23-AS1	ENSG00000223817	lncRNA	0.150123	-0.526931	0.941622	-0.559599	0.575753
AL603910.1	ENSG00000223821	lncRNA	8.02246	-0.163503	0.0818144	-1.99846	0.0456664	0.0803555
LINC01342	ENSG00000223823	lncRNA	6.25744	0.0323875	0.157369	0.205806	0.836943	0.872875
LINC01870	ENSG00000223826	lncRNA	0.571851	-0.0523612	0.237639	-0.22034	0.825607	0.863758
AC004870.2	ENSG00000223829	lncRNA	20.5833	-0.0127459	0.239401	-0.0532409	0.95754	0.968167
AC005006.1	ENSG00000223831	lncRNA	5.12985	-0.477188	0.135752	-3.51515	0.000439505	0.00137709
AL161935.1	ENSG00000223834	lncRNA	6.66487	-0.164799	0.112493	-1.46496	0.142931	0.20973
AL645941.1	ENSG00000223837	lncRNA	4.4003	0.189372	0.110846	1.70842	0.0875577	0.139537
AC007091.1	ENSG00000223838	lncRNA	0.196652	-0.334675	0.662088	-0.505485	0.613218
AL360093.1	ENSG00000223842	lncRNA	5.71615	-0.235251	0.118476	-1.98565	0.047072	0.0824206
EFCAB6-AS1	ENSG00000223843	lncRNA	6.15012	-0.846725	0.14383	-5.88701	3.93253e-09	3.96054e-08
MYCNUT	ENSG00000223850	lncRNA	0.269317	-0.339167	0.393683	-0.861523	0.38895	0.474717
HRAT92	ENSG00000223855	lncRNA	104.098	-0.254276	0.111738	-2.27563	0.022868	0.0443464
AC007403.1	ENSG00000223859	lncRNA	0.316454	-0.196958	0.299612	-0.657376	0.510939	0.590634
LINC01805	ENSG00000223863	lncRNA	0.27674	-0.249309	0.279186	-0.892986	0.371865	0.458061
AP000233.1	ENSG00000223870	lncRNA	0.651911	-0.502621	0.339097	-1.48223	0.138279	0.204008
AC006372.1	ENSG00000223872	lncRNA	0.64963	0.80975	0.244988	3.30526	0.000948892	0.00273893
LINC01921	ENSG00000223874	lncRNA	0.06979	-0.516008	2.01659	-0.255882	0.798042
LINC01078	ENSG00000223880	lncRNA	0.270385	-0.524814	0.44303	-1.1846	0.236176	0.31705
AL157402.1	ENSG00000223881	lncRNA	0.459726	-0.350392	0.482851	-0.725674	0.468039	0.550696
ABCC5-AS1	ENSG00000223882	lncRNA	1.79701	-0.65125	0.19429	-3.35195	0.000802459	0.00235871
LINC01707	ENSG00000223883	lncRNA	0.45231	-0.521757	0.322873	-1.61598	0.106098	0.163831
AC068481.1	ENSG00000223884	lncRNA	2.52346	-0.228102	0.147504	-1.54641	0.122005	0.183749
OSER1-DT	ENSG00000223891	lncRNA	671.925	-0.132179	0.0554281	-2.38469	0.0170936	0.0345368
AP001469.1	ENSG00000223901	lncRNA	5.68737	-0.187727	0.140291	-1.33813	0.180855	0.254882
AC104457.2	ENSG00000223906	lncRNA	0.174655	-0.368058	0.498403	-0.738474	0.460226
ZNF32-AS3	ENSG00000223910	lncRNA	0.662005	-0.0694557	0.202416	-0.343133	0.731498	0.785844
AC009480.1	ENSG00000223911	lncRNA	1.08643	-1.46259	0.312636	-4.67827	2.89307e-06	1.52085e-05
LINC02471	ENSG00000223914	lncRNA	224.583	-0.17256	0.172748	-0.998911	0.317838	0.403866
AC010136.1	ENSG00000223923	lncRNA	53.9279	-0.342859	0.0974438	-3.51854	0.000433935	0.00136177
AC117453.1	ENSG00000223930	lncRNA	3.37887	0.0729265	0.145328	0.501805	0.615804	0.685917
LGALSL-DT	ENSG00000223935	lncRNA	16.6565	-0.0908213	0.0846284	-1.07318	0.283192	0.367693
LINC01014	ENSG00000223941	lncRNA	4.31011	-0.046894	0.254674	-0.184134	0.853909	0.886908
AL590302.1	ENSG00000223942	lncRNA	0.0299062	-0.290953	1.56738	-0.18563	0.852735
AL353604.1	ENSG00000223944	lncRNA	0.157197	-0.378755	0.522327	-0.725131	0.468371
AL513008.1	ENSG00000223946	lncRNA	2.38765	-0.305654	0.171731	-1.77984	0.0751015	0.122672
AC016738.1	ENSG00000223947	lncRNA	26.3116	-0.354264	0.1329	-2.66565	0.00768398	0.0172232
ROR1-AS1	ENSG00000223949	lncRNA	11.3982	-1.18634	0.170632	-6.95264	3.58516e-12	7.00282e-11
LINC01767	ENSG00000223956	lncRNA	6.97561	-0.229567	0.126653	-1.81256	0.0698994	0.115393
CHROMR	ENSG00000223960	lncRNA	386.882	0.177333	0.0548201	3.23483	0.00121717	0.00340634
AL159990.1	ENSG00000223966	lncRNA	0
AC002456.1	ENSG00000223969	lncRNA	14.2593	-0.339278	0.115612	-2.93463	0.00333945	0.0082946
AP001048.1	ENSG00000223975	lncRNA	0.0483707	-0.29115	1.14178	-0.254997	0.798726
SMCR2	ENSG00000223979	lncRNA	3.05725	-0.279824	0.164558	-1.70045	0.0890455	0.141509
LINC01874	ENSG00000223985	lncRNA	14.4041	-0.133627	0.260315	-0.513329	0.607721	0.678771
AL357140.1	ENSG00000223989	lncRNA	0
AC104809.1	ENSG00000223991	lncRNA	2.55529	0.187651	0.179202	1.04715	0.29503	0.38023
LINC02647	ENSG00000223993	lncRNA	0.0224398	-0.333662	2.3594	-0.141418	0.88754
AC244250.1	ENSG00000223999	lncRNA	2.77248	0.111641	0.134204	0.831875	0.40548	0.490813
Z97198.1	ENSG00000224000	lncRNA	1.01536	-0.646663	0.210344	-3.07431	0.00210991	0.00553243
LINC01441	ENSG00000224008	lncRNA	0.471297	-0.974738	0.377028	-2.58532	0.00972875	0.0211545
AC063976.1	ENSG00000224015	lncRNA	0.958005	-0.300798	0.277772	-1.0829	0.278855	0.363091
LINC01449	ENSG00000224017	lncRNA	5.16845	-0.158477	0.150067	-1.05604	0.290949	0.376081
AP000470.1	ENSG00000224018	lncRNA	0.109758	-0.462652	0.92164	-0.501988	0.615676
MIR181A2HG	ENSG00000224020	lncRNA	16.8501	-0.20729	0.0886533	-2.33821	0.0193765	0.0384947
EDRF1-DT	ENSG00000224023	lncRNA	40.1357	0.082326	0.0617796	1.33258	0.182671	0.257062
AL133456.1	ENSG00000224027	lncRNA	0.0679611	-0.334214	0.817261	-0.408945	0.68258
LINC01853	ENSG00000224028	lncRNA	0.192047	-0.409943	0.50145	-0.817516	0.413634
AL450344.1	ENSG00000224029	lncRNA	0.813125	-1.14041	0.283735	-4.0193	5.83718e-05	0.000226338
TCEAL3-AS1	ENSG00000224031	lncRNA	2.41723	-0.619539	0.1674	-3.70095	0.000214796	0.000725549
EPB41L4A-AS1	ENSG00000224032	lncRNA	2348.31	-0.0712662	0.072859	-0.97814	0.328005	0.414429
LINC02561	ENSG00000224034	lncRNA	5.89582	-0.670318	0.122987	-5.45033	5.02756e-08	3.93884e-07
BX005214.1	ENSG00000224038	lncRNA	0.0144984	-0.354958	2.89071	-0.122792	0.902271
CCNT2-AS1	ENSG00000224043	lncRNA	53.0821	0.174587	0.0517082	3.37638	0.000734461	0.00217866
AC005076.1	ENSG00000224046	lncRNA	31.235	-0.247423	0.0681615	-3.62996	0.000283468	0.000930422
LINC02612	ENSG00000224048	lncRNA	0.341682	-0.710263	0.353367	-2.00999	0.0444326	0.0784828
AC108681.1	ENSG00000224049	lncRNA	0.856171	0.0193909	0.420588	0.0461042	0.963227	0.972566
EGFR-AS1	ENSG00000224057	lncRNA	906.636	-0.685784	0.193308	-3.54762	0.000388736	0.00123387
AC007319.1	ENSG00000224063	lncRNA	34.9619	-0.431923	0.121659	-3.55027	0.000384832	0.00122292
AL049795.1	ENSG00000224066	lncRNA	16.0081	-0.164946	0.111141	-1.48411	0.137779	0.203376
LINC00691	ENSG00000224074	lncRNA	1.09036	-0.592017	0.280738	-2.10879	0.034963	0.0639528
TTTY22	ENSG00000224075	lncRNA	0.00468846	-0.312093	2.89071	-0.107964	0.914024
AC009487.1	ENSG00000224076	lncRNA	0
AP000936.1	ENSG00000224077	lncRNA	0.349062	-0.290376	0.267346	-1.08614	0.277416	0.361566
SNHG14	ENSG00000224078	lncRNA	2970.89	0.060716	0.0607016	1.00024	0.317196	0.403228
AC091729.1	ENSG00000224079	lncRNA	4.56333	-0.588002	0.138949	-4.23177	2.31857e-05	9.90917e-05
PPM1F-AS1	ENSG00000224086	lncRNA	302.365	0.0196115	0.0621496	0.315553	0.752342	0.803414
POTEF-AS1	ENSG00000224087	lncRNA	0.0310912	-0.248127	1.65061	-0.150324	0.880509
AC097468.1	ENSG00000224090	lncRNA	0.585388	-0.586229	0.311586	-1.88144	0.0599123	0.101214
AC104389.2	ENSG00000224091	lncRNA	0.179239	-0.48389	0.620747	-0.779529	0.435668
BCAR3-AS1	ENSG00000224093	lncRNA	224.555	-0.0627582	0.0954351	-0.657601	0.510795	0.590555
LINC01935	ENSG00000224095	lncRNA	0.360887	-0.874094	0.357252	-2.44672	0.0144164	0.0297897
AC104823.1	ENSG00000224099	lncRNA	0.399253	0.0331524	0.298468	0.111075	0.911557	0.931947
AP001630.1	ENSG00000224100	lncRNA	2.3162	-0.460768	0.160046	-2.87897	0.00398975	0.00968975
ELMO1-AS1	ENSG00000224101	lncRNA	0.710657	-1.11373	0.307153	-3.626	0.000287846	0.000943104
INHBA-AS1	ENSG00000224116	lncRNA	73.7504	-0.202736	0.158835	-1.27639	0.201819	0.279071
POU6F2-AS1	ENSG00000224122	lncRNA	7.81912	-0.740776	0.274169	-2.7019	0.00689452	0.0156908
AC099786.1	ENSG00000224127	lncRNA	6.45499	-0.247259	0.250587	-0.986719	0.323781	0.410052
LINC01248	ENSG00000224128	lncRNA	0.219122	0.336186	0.695431	0.483421	0.628797
AC112715.1	ENSG00000224132	lncRNA	2.33437	-0.181341	0.192981	-0.939683	0.34738	0.433813
LINC01857	ENSG00000224137	lncRNA	33.7091	-0.726855	0.127429	-5.70402	1.17017e-08	1.06056e-07
AC000123.1	ENSG00000224138	lncRNA	53.8786	-0.351239	0.0643001	-5.46251	4.6946e-08	3.7014e-07
MIR548XHG	ENSG00000224141	lncRNA	0.69548	0.0617494	0.342264	0.180414	0.856827	0.889275
AMMECR1-IT1	ENSG00000224142	lncRNA	0.977787	-1.23354	0.286334	-4.30806	1.64696e-05	7.28548e-05
AC099786.2	ENSG00000224149	lncRNA	10.5468	0.136817	0.248299	0.551015	0.581623	0.654924
AC009506.1	ENSG00000224152	lncRNA	104.916	-0.0235239	0.060036	-0.39183	0.695184	0.754634
LINC02054	ENSG00000224153	lncRNA	1.30138	-0.283128	0.211462	-1.33891	0.1806	0.254562
HCG14	ENSG00000224157	lncRNA	4.97962	-0.578737	0.121526	-4.76226	1.91435e-06	1.04932e-05
LINC02828	ENSG00000224164	lncRNA	4.29101	-0.345525	0.107708	-3.20797	0.00133674	0.00370186
DNAJC27-AS1	ENSG00000224165	lncRNA	111.569	-0.0353261	0.0694803	-0.508433	0.611149	0.681779
LINC01357	ENSG00000224167	lncRNA	10.6668	-0.621564	0.116617	-5.32996	9.82353e-08	7.20938e-07
LINC02831	ENSG00000224173	lncRNA	0.431726	0.0477577	0.365584	0.130634	0.896065	0.919855
AL137802.1	ENSG00000224174	lncRNA	0.887578	-0.104835	0.208703	-0.502315	0.615446	0.685592
LINC00570	ENSG00000224177	lncRNA	2.85697	-0.709786	0.161933	-4.38321	1.16945e-05	5.35248e-05
MIR3681HG	ENSG00000224184	lncRNA	17.4372	1.49208	0.173957	8.57725	9.71661e-18	6.02509e-16
C5orf66	ENSG00000224186	lncRNA	35.8962	-0.262178	0.0797965	-3.28558	0.00101772	0.00291384
LINC01991	ENSG00000224187	lncRNA	0.547346	-0.658543	0.428114	-1.53824	0.12399	0.186292
HAGLR	ENSG00000224189	lncRNA	1081.44	0.4497	0.0996971	4.51066	6.46257e-06	3.13875e-05
LINC02667	ENSG00000224190	lncRNA	0.547585	0.314231	0.290076	1.08327	0.278688	0.362894
SEZ6L-AS1	ENSG00000224192	lncRNA	0.0767215	-0.484026	1.31557	-0.367922	0.712931
AC008278.1	ENSG00000224194	lncRNA	0.588533	-0.0265223	0.260501	-0.101813	0.918905	0.937586
AC022400.1	ENSG00000224195	lncRNA	13.103	-0.0585421	0.074663	-0.784086	0.43299	0.517281
PHEX-AS1	ENSG00000224204	lncRNA	4.19492	-0.588013	0.187645	-3.13365	0.00172647	0.0046363
LINC00466	ENSG00000224209	lncRNA	0.490609	-1.01762	0.340599	-2.98775	0.00281043	0.00712385
AL606469.1	ENSG00000224215	lncRNA	6.30252	0.2607	0.0937443	2.78097	0.00541972	0.0127061
AC234781.1	ENSG00000224216	lncRNA	4.31473	-0.537743	0.10174	-5.28546	1.25388e-07	8.96515e-07
AC107072.1	ENSG00000224218	lncRNA	0.51151	-0.540164	0.278975	-1.93625	0.0528374	0.0910002
DTNB-AS1	ENSG00000224220	lncRNA	6.96558	-1.7659	0.181258	-9.74246	1.98686e-22	3.13951e-20
LINC02636	ENSG00000224222	lncRNA	2.31323	-0.267944	0.163152	-1.6423	0.100528	0.156618
VSTM2A-OT1	ENSG00000224223	lncRNA	0.504248	0.218178	0.450435	0.48437	0.628123	0.696725
AL031599.1	ENSG00000224228	lncRNA	1.54325	-0.141524	0.178913	-0.791024	0.42893	0.513407
LINC01832	ENSG00000224231	lncRNA	2.38676	-0.323928	0.186759	-1.73446	0.0828357	0.133198
WARS2-IT1	ENSG00000224238	lncRNA	10.7484	-0.242655	0.115508	-2.10077	0.0356613	0.0650069
AC090044.1	ENSG00000224239	lncRNA	12.2407	0.0407954	0.17025	0.23962	0.810625	0.851466
SOX1-OT	ENSG00000224243	lncRNA	0.166936	-0.25039	0.592177	-0.42283	0.672419
AJ009632.1	ENSG00000224247	lncRNA	0.286595	-0.794639	0.437012	-1.81835	0.0690112	0.114169
AC025947.1	ENSG00000224250	lncRNA	0.07559	-0.355627	0.859305	-0.413854	0.678981
AL391427.1	ENSG00000224251	lncRNA	10.8452	-0.650012	0.157971	-4.11477	3.87567e-05	0.000156862
VWC2L-IT1	ENSG00000224257	lncRNA	0.55369	-1.22879	0.372397	-3.29967	0.00096799	0.00278696
LINC01133	ENSG00000224259	lncRNA	7.21423	-0.299962	0.186107	-1.61177	0.107012	0.164969
AL023754.1	ENSG00000224260	lncRNA	0.797964	-1.16787	0.32633	-3.5788	0.000345182	0.00110861
LINC02633	ENSG00000224265	lncRNA	0.308116	-0.464736	0.412964	-1.12537	0.260434	0.343478
AL772155.1	ENSG00000224267	lncRNA	0.0211416	-0.344388	2.37267	-0.145148	0.884594
AP000697.1	ENSG00000224269	lncRNA	0.470428	0.90093	0.38984	2.31103	0.0208314	0.0409726
AL117329.1	ENSG00000224271	lncRNA	0.732683	-0.541148	0.455185	-1.18885	0.234498	0.315138
AC131097.2	ENSG00000224272	lncRNA	11.5007	0.178316	0.13797	1.29242	0.196211	0.272537
ARHGEF2-AS1	ENSG00000224276	lncRNA	1.60222	0.057737	0.187867	0.307329	0.758593	0.808394
AP000345.1	ENSG00000224277	lncRNA	0.489119	-0.360372	0.397465	-0.906678	0.364577	0.450538
SLC25A5-AS1	ENSG00000224281	lncRNA	83.6898	0.0652708	0.0712491	0.916094	0.359617	0.445719
LINC01142	ENSG00000224286	lncRNA	0.712077	-0.0467441	0.255649	-0.182845	0.85492	0.887737
AF196972.1	ENSG00000224292	lncRNA	4.43821	-0.0664693	0.103826	-0.640201	0.522042	0.600589
PINCR	ENSG00000224294	lncRNA	0.73853	-0.754076	0.240959	-3.12948	0.00175118	0.00469496
AL590502.1	ENSG00000224301	lncRNA	0.467179	-0.505724	0.283607	-1.78319	0.0745562	0.121908
AL161785.1	ENSG00000224307	lncRNA	57.73	0.277806	0.0696076	3.99103	6.57856e-05	0.000252096
LINC01527	ENSG00000224308	lncRNA	0.312552	-0.526613	0.3312	-1.59001	0.111831	0.17119
LINC01567	ENSG00000224310	lncRNA	5.49161	0.375646	0.217891	1.72401	0.0847053	0.135808
AL590640.1	ENSG00000224311	lncRNA	0.628349	-0.938289	0.325174	-2.88549	0.00390799	0.00951438
CHL1-AS2	ENSG00000224318	lncRNA	2.82595	0.878238	0.338612	2.59364	0.00949666	0.0207049
AC004009.1	ENSG00000224322	lncRNA	0.165552	-0.110229	0.463302	-0.237921	0.811942
AL136234.1	ENSG00000224326	lncRNA	1.11343	-0.846656	0.219476	-3.85762	0.000114496	0.000412995
MDC1-AS1	ENSG00000224328	lncRNA	0.695338	-0.289226	0.199479	-1.4499	0.147085	0.214767
LINC00297	ENSG00000224329	lncRNA	0.493406	-0.731781	0.522774	-1.3998	0.161572	0.232249
AC005019.2	ENSG00000224330	lncRNA	0.295992	-0.366718	0.459519	-0.798048	0.424843	0.50946
AC007879.1	ENSG00000224342	lncRNA	1.26416	-0.731333	0.182299	-4.01171	6.02805e-05	0.000232981
SCEL-AS1	ENSG00000224347	lncRNA	0.033773	-0.20538	1.24524	-0.164932	0.868998
FAM135A-AS1	ENSG00000224349	lncRNA	1.6022	-0.205871	0.161844	-1.27203	0.203361	0.280746
AL356966.1	ENSG00000224356	lncRNA	17.1758	-0.0172306	0.134575	-0.128037	0.89812	0.92159
TMCO1-AS1	ENSG00000224358	lncRNA	22.0781	-0.0775453	0.072698	-1.06668	0.286117	0.370819
AL358176.1	ENSG00000224359	lncRNA	0.203715	-0.575836	0.535415	-1.07549	0.282153
AC011239.1	ENSG00000224361	lncRNA	1.01761	-0.323448	0.275163	-1.17548	0.239805	0.321169
FP700111.1	ENSG00000224363	lncRNA	0.312136	-0.816225	0.353228	-2.31076	0.0208463	0.0410001
AL391361.2	ENSG00000224371	lncRNA	1.8603	-0.184516	0.207656	-0.888567	0.374236	0.460326
AL023693.1	ENSG00000224374	lncRNA	0.216211	-0.398691	0.781619	-0.510084	0.609993
AC009276.1	ENSG00000224375	lncRNA	0.607061	-0.583106	0.285894	-2.03958	0.0413918	0.0738231
AC017104.1	ENSG00000224376	lncRNA	59.6087	-0.295165	0.0774494	-3.81107	0.000138367	0.000488976
LINC00703	ENSG00000224382	lncRNA	0.503158	0.0248887	0.299616	0.0830685	0.933797	0.949461
AL033379.1	ENSG00000224384	lncRNA	0.0579516	-0.312643	0.964589	-0.32412	0.745847
AL139246.1	ENSG00000224387	lncRNA	3.76079	0.0214774	0.169233	0.12691	0.899011	0.922257
BACE2-IT1	ENSG00000224388	lncRNA	0
LINC01280	ENSG00000224391	lncRNA	1.77995	0.239002	0.213748	1.11815	0.263504	0.346828
GPC6-AS2	ENSG00000224394	lncRNA	2.9534	-1.24537	0.184532	-6.74879	1.49086e-11	2.52902e-10
PELATON	ENSG00000224397	lncRNA	218.213	-0.274295	0.10531	-2.60465	0.00919676	0.0201219
AC010880.1	ENSG00000224400	lncRNA	0.0820708	-0.227031	1.01644	-0.223359	0.823256
Z68323.1	ENSG00000224404	lncRNA	0.18503	-0.293692	0.440612	-0.666554	0.505057
LINC00572	ENSG00000224405	lncRNA	0.0760294	-0.37704	0.775244	-0.48635	0.626719
LINC02052	ENSG00000224406	lncRNA	0.512312	-0.778989	0.261022	-2.98438	0.0028415	0.00719108
AL136988.1	ENSG00000224407	lncRNA	0
AC114489.2	ENSG00000224409	lncRNA	0.708428	0.0878177	0.284081	0.309129	0.757223	0.807291
AP001476.1	ENSG00000224413	lncRNA	5.10497	0.248278	0.162187	1.53081	0.125815	0.188546
AL606970.1	ENSG00000224417	lncRNA	88.2712	-0.192978	0.160622	-1.20145	0.229579	0.309664
STK24-AS1	ENSG00000224418	lncRNA	18.3289	-0.131447	0.0851482	-1.54374	0.122651	0.184577
PRKAR2A-AS1	ENSG00000224424	lncRNA	82.4049	0.161014	0.0515668	3.12244	0.0017936	0.00479185
LINC00539	ENSG00000224429	lncRNA	38.6283	-0.228778	0.0778494	-2.93872	0.00329569	0.00819789
LINC01708	ENSG00000224445	lncRNA	0.242064	-0.446425	0.320411	-1.39329	0.163533	0.234524
SLC25A34-AS1	ENSG00000224459	lncRNA	9.09085	-0.0260756	0.121425	-0.214747	0.829965	0.867229
AC009313.1	ENSG00000224467	lncRNA	0.776351	-1.88891	0.341166	-5.53662	3.08367e-08	2.53419e-07
LAMC1-AS1	ENSG00000224468	lncRNA	15.7119	0.000530642	0.100807	0.00526394	0.9958	0.996866
AL109933.1	ENSG00000224477	lncRNA	0.553632	-0.440758	0.334274	-1.31855	0.187319	0.26233
AL356417.1	ENSG00000224478	lncRNA	1.64676	-0.0536514	0.180106	-0.297889	0.765788	0.814433
AC245100.1	ENSG00000224481	lncRNA	4.72957	-0.386394	0.122618	-3.15119	0.00162607	0.0043984
TTC21B-AS1	ENSG00000224490	lncRNA	1921.19	-0.725561	0.158082	-4.58977	4.43731e-06	2.2347e-05
AL731575.1	ENSG00000224500	lncRNA	0.630722	-1.79577	0.376874	-4.7649	1.88945e-06	1.03679e-05
AC025428.1	ENSG00000224504	lncRNA	0.492844	-0.487855	0.432577	-1.12779	0.259409	0.342342
AC138150.1	ENSG00000224505	lncRNA	11.9048	-0.346906	0.128237	-2.70519	0.00682661	0.0155517
LINC02523	ENSG00000224506	lncRNA	1.39638	-0.0295336	0.204522	-0.144403	0.885183	0.911233
MRPS9-AS2	ENSG00000224509	lncRNA	2.61434	-0.0109174	0.141199	-0.0773194	0.938369	0.953053
LINC00365	ENSG00000224511	lncRNA	2.65447	0.634277	0.179493	3.53372	0.000409752	0.00129341
AC109309.1	ENSG00000224513	lncRNA	8.35824	-0.554508	0.35577	-1.55861	0.119088	0.180233
LINC00620	ENSG00000224514	lncRNA	0.293464	-0.30465	0.428018	-0.711768	0.476609	0.558685
AL590385.1	ENSG00000224515	lncRNA	0.261126	-0.401357	0.356325	-1.12638	0.260005	0.343001
AC068134.1	ENSG00000224516	lncRNA	0.0212056	-0.322974	2.03352	-0.158826	0.873806
HTR2A-AS1	ENSG00000224517	lncRNA	0.197995	-0.369823	0.400182	-0.924137	0.355415
AC098483.1	ENSG00000224521	lncRNA	12.3665	-0.046009	0.219265	-0.209833	0.833798	0.870321
AL591686.1	ENSG00000224525	lncRNA	0.886175	-0.209773	0.334053	-0.627963	0.530028	0.607671
AL136361.1	ENSG00000224532	lncRNA	0.291636	-0.599912	0.360692	-1.66322	0.0962676	0.151079
TMLHE-AS1	ENSG00000224533	lncRNA	5.70317	-0.678795	0.101756	-6.6708	2.54419e-11	4.11235e-10
LINC02771	ENSG00000224535	lncRNA	0.451619	-0.012176	0.218806	-0.0556477	0.955622	0.966783
AC096677.1	ENSG00000224536	lncRNA	14.1185	-0.22803	0.0994096	-2.29384	0.0217996	0.0425822
AP001439.1	ENSG00000224541	lncRNA	3.6544	-1.04078	0.157087	-6.62552	3.46025e-11	5.41908e-10
AC017067.1	ENSG00000224549	lncRNA	2.6738	-0.377194	0.1676	-2.25056	0.0244136	0.046901
LINC01087	ENSG00000224559	lncRNA	1.70398	-0.40853	0.173945	-2.34862	0.0188431	0.0375649
LPP-AS1	ENSG00000224563	lncRNA	0.689965	-1.27851	0.257636	-4.96244	6.96119e-07	4.21164e-06
LINC01754	ENSG00000224565	lncRNA	0.993542	0.00624416	0.209202	0.0298474	0.976189	0.982406
LINC01886	ENSG00000224568	lncRNA	145.733	-0.260318	0.151805	-1.71481	0.0863793	0.138053
COL18A1-AS2	ENSG00000224574	lncRNA	4.22402	-0.306388	0.145765	-2.10193	0.0355595	0.0648575
LINC01117	ENSG00000224577	lncRNA	75.9158	-0.177905	0.0886943	-2.00582	0.0448756	0.0791768
LINC01015	ENSG00000224582	lncRNA	0.194454	-0.422777	0.360025	-1.1743	0.240275
AL356277.2	ENSG00000224583	lncRNA	0.959064	-1.35474	0.555969	-2.43671	0.0148215	0.0305304
MIR3659HG	ENSG00000224592	lncRNA	4.92227	-0.105504	0.124479	-0.847565	0.39668	0.482289
AC073626.1	ENSG00000224595	lncRNA	0.275852	-0.772023	0.443716	-1.7399	0.0818764	0.131914
ZMIZ1-AS1	ENSG00000224596	lncRNA	74.1279	-0.459342	0.111605	-4.11578	3.85867e-05	0.000156243
AL080284.1	ENSG00000224605	lncRNA	0.160902	-0.237995	0.764886	-0.311151	0.755686
TGFA-IT1	ENSG00000224606	lncRNA	1.02424	-0.219706	0.219395	-1.00142	0.316625	0.402625
HSD52	ENSG00000224609	lncRNA	11.1967	-0.849597	0.126865	-6.69688	2.12912e-11	3.49319e-10
AC108879.1	ENSG00000224610	lncRNA	0.443886	-0.450602	0.328336	-1.37238	0.169944	0.242195
AC011901.1	ENSG00000224612	lncRNA	0.130117	-0.5378	0.949815	-0.566216	0.571247
AC095032.1	ENSG00000224613	lncRNA	1.48039	-0.144003	0.164612	-0.8748	0.381683	0.467616
TNK2-AS1	ENSG00000224614	lncRNA	12.6691	0.0277197	0.089266	0.310529	0.756159	0.806438
RTCA-AS1	ENSG00000224616	lncRNA	41.356	0.150986	0.0643954	2.34467	0.019044	0.0379137
AL451042.1	ENSG00000224621	lncRNA	7.90622	0.2028	0.10015	2.02496	0.0428713	0.0760769
AC106053.1	ENSG00000224626	lncRNA	1.04345	-2.5604	0.305676	-8.37619	5.46684e-17	2.90618e-15
AL391095.1	ENSG00000224635	lncRNA	17.6894	-0.473344	0.130688	-3.62193	0.000292414	0.000956294
AC064871.2	ENSG00000224643	lncRNA	0.775243	-1.20193	0.273337	-4.39723	1.09639e-05	5.04274e-05
AL135787.1	ENSG00000224644	lncRNA	2.56228	-0.782571	0.172204	-4.54444	5.50824e-06	2.71759e-05
AL391069.1	ENSG00000224645	lncRNA	0
LINC01627	ENSG00000224648	lncRNA	0.142934	-0.292157	0.585178	-0.499262	0.617595
AF124730.1	ENSG00000224649	lncRNA	4.94583	-0.427807	0.134018	-3.19216	0.00141211	0.00388431
LINC00885	ENSG00000224652	lncRNA	7.63254	-0.460194	0.224426	-2.05053	0.0403123	0.0721703
LINC01823	ENSG00000224655	lncRNA	0.942651	-0.218497	0.229925	-0.950297	0.341961	0.428447
AL513164.1	ENSG00000224658	lncRNA	6.68833	-0.791856	0.257408	-3.07627	0.0020961	0.00550092
SH3BP5-AS1	ENSG00000224660	lncRNA	524.531	-0.0756157	0.0908434	-0.832374	0.405198	0.490562
AC010907.1	ENSG00000224661	lncRNA	0.22517	-0.0694679	0.409946	-0.169456	0.865438	0.895797
ETV7-AS1	ENSG00000224666	lncRNA	9.1696	-0.528398	0.0978567	-5.39971	6.67477e-08	5.1003e-07
AC105940.1	ENSG00000224671	lncRNA	0.245901	-0.329221	0.313521	-1.05008	0.293683	0.378911
AC009227.1	ENSG00000224675	lncRNA	4.61226	0.0347528	0.167487	0.207495	0.835623	0.871908
RASAL2-AS1	ENSG00000224687	lncRNA	66.1151	0.331012	0.0526099	6.29182	3.13763e-10	4.00721e-09
AL133553.1	ENSG00000224691	lncRNA	2.19133	0.0725486	0.160591	0.451761	0.651441	0.716995
AL390038.1	ENSG00000224698	lncRNA	0.0687442	-0.344821	0.814335	-0.423439	0.671975
LAMTOR5-AS1	ENSG00000224699	lncRNA	86.1948	-0.377432	0.0626069	-6.0286	1.65381e-09	1.82217e-08
AP000844.1	ENSG00000224700	lncRNA	0.625716	-1.19435	0.337126	-3.54274	0.000395997	0.00125414
LMX1A-AS2	ENSG00000224702	lncRNA	0.0516123	-0.280543	0.998957	-0.280836	0.778836
E2F3-IT1	ENSG00000224707	lncRNA	1.00914	-2.42545	0.373755	-6.48941	8.61727e-11	1.24175e-09
LINC01706	ENSG00000224711	lncRNA	3.42063	-0.48446	0.148578	-3.26064	0.00111163	0.00314576
AC025165.1	ENSG00000224713	lncRNA	26.1712	0.141283	0.126483	1.11701	0.26399	0.347287
LINC02671	ENSG00000224714	lncRNA	11.5083	-0.146744	0.206492	-0.710653	0.477299	0.559325
Z82186.1	ENSG00000224715	lncRNA	0.955952	0.058412	0.25005	0.233601	0.815295	0.855274
LEMD1-DT	ENSG00000224717	lncRNA	1.60087	-0.161298	0.164639	-0.979705	0.327232	0.413646
LINC01657	ENSG00000224718	lncRNA	0.172689	-0.583972	0.550572	-1.06066	0.288843
AC007182.1	ENSG00000224721	lncRNA	6.31209	-0.409461	0.145171	-2.82055	0.00479413	0.0113945
PCOLCE-AS1	ENSG00000224729	lncRNA	28.5925	-0.0410533	0.117609	-0.349066	0.727039	0.782007
LILRB1-AS1	ENSG00000224730	lncRNA	0.544222	-0.0131249	0.200082	-0.0655977	0.947698	0.960547
AC016716.1	ENSG00000224731	lncRNA	0.798092	-0.577993	0.362404	-1.59488	0.110738	0.169788
AL034349.1	ENSG00000224733	lncRNA	1.1687	-1.51613	0.244588	-6.19871	5.69286e-10	6.93433e-09
AC099850.1	ENSG00000224738	lncRNA	34.757	-0.000420096	0.0513501	-0.00818101	0.993473	0.995109
AC016735.1	ENSG00000224739	lncRNA	3.50828	0.475972	0.146699	3.24456	0.00117632	0.00330534
TEX26-AS1	ENSG00000224743	lncRNA	11.2289	-0.213021	0.13912	-1.5312	0.12572	0.18844
AC063965.2	ENSG00000224745	lncRNA	16.7316	-1.01808	0.133933	-7.60144	2.92861e-14	8.84063e-13
AC015987.1	ENSG00000224746	lncRNA	13.1909	-0.682653	0.115652	-5.90265	3.57712e-09	3.64424e-08
AL391704.1	ENSG00000224750	lncRNA	0.419869	-0.466572	0.285948	-1.63166	0.10275	0.159516
LINC01167	ENSG00000224758	lncRNA	1.97964	-0.185991	0.319182	-0.582711	0.560088	0.63552
AL353768.1	ENSG00000224764	lncRNA	1.7392	-0.135876	0.1419	-0.957549	0.33829	0.424975
AL035443.1	ENSG00000224765	lncRNA	0.0914068	-0.173796	0.724867	-0.239762	0.810515
ATP2B2-IT2	ENSG00000224771	lncRNA	0.267722	-0.458131	0.433161	-1.05765	0.290217	0.37527
LINC02670	ENSG00000224788	lncRNA	0.0517908	-0.419628	1.27662	-0.328702	0.742381
AC012363.1	ENSG00000224789	lncRNA	0.160037	-0.195749	0.613409	-0.319116	0.749639
AP000704.2	ENSG00000224790	lncRNA	9.11737	0.127647	0.0837075	1.52492	0.127278	0.190253
AL022326.1	ENSG00000224794	lncRNA	3.61747	-0.210106	0.184408	-1.13936	0.254554	0.337256
NTM-AS1	ENSG00000224795	lncRNA	0.101133	-0.452005	0.85276	-0.53005	0.596077
AL139397.1	ENSG00000224799	lncRNA	5.70596	0.0228859	0.0872785	0.262217	0.793154	0.836933
LINC00853	ENSG00000224805	lncRNA	78.2791	-0.631582	0.0885999	-7.12848	1.01485e-12	2.25095e-11
SRGAP3-AS1	ENSG00000224808	lncRNA	0.150501	-0.560325	0.710469	-0.78867	0.430305
AL355482.1	ENSG00000224810	lncRNA	13.735	-0.82967	0.169964	-4.88145	1.0531e-06	6.12088e-06
TMEM72-AS1	ENSG00000224812	lncRNA	23.8188	-0.370337	0.0826845	-4.47891	7.50245e-06	3.59277e-05
AC114812.2	ENSG00000224814	lncRNA	5.47706	-1.39868	0.182556	-7.66162	1.83606e-14	5.77854e-13
AC010789.1	ENSG00000224817	lncRNA	12.6731	-0.919178	0.213507	-4.30513	1.66885e-05	7.3689e-05
AC096677.2	ENSG00000224818	lncRNA	0
AC093843.1	ENSG00000224819	lncRNA	0.0920746	-0.377001	0.983827	-0.383198	0.701573
COL4A2-AS2	ENSG00000224821	lncRNA	5.88728	-0.383626	0.141665	-2.70798	0.00676939	0.0154344
THRB-IT1	ENSG00000224822	lncRNA	5.30548	-1.69228	0.217855	-7.76791	7.97921e-15	2.70643e-13
RORB-AS1	ENSG00000224825	lncRNA	0.300979	0.272091	0.335288	0.811513	0.417071	0.501861
LINC01689	ENSG00000224832	lncRNA	0.564081	-0.689211	0.360049	-1.91421	0.055593	0.0950628
AL161908.1	ENSG00000224842	lncRNA	0.970024	-1.46114	0.32549	-4.48906	7.15365e-06	3.4412e-05
LINC00240	ENSG00000224843	lncRNA	256.223	-0.551054	0.0877084	-6.2828	3.32538e-10	4.22931e-09
AC107079.1	ENSG00000224844	lncRNA	1.1291	-0.380662	0.176532	-2.15633	0.0310576	0.0577545
NQO2-AS1	ENSG00000224846	lncRNA	10.1653	-0.701073	0.190132	-3.68729	0.000226651	0.00076207
AL589843.1	ENSG00000224848	lncRNA	24.5135	0.208775	0.0935918	2.2307	0.0257011	0.0490353
LINC00502	ENSG00000224851	lncRNA	0.361744	-0.241077	0.276896	-0.870639	0.383951	0.46978
LINC00393	ENSG00000224853	lncRNA	0.335078	-0.140722	0.295773	-0.475775	0.634235	0.702127
CDKN2A-DT	ENSG00000224854	lncRNA	1.75798	-0.0437314	0.156628	-0.279206	0.780087	0.826127
OPA1-AS1	ENSG00000224855	lncRNA	5.13771	-0.75605	0.139795	-5.40826	6.3639e-08	4.88229e-07
LINC01691	ENSG00000224857	lncRNA	0.819738	-0.715792	0.213662	-3.35012	0.000807768	0.00237216
LINC01398	ENSG00000224863	lncRNA	3.56581	-0.384588	0.153427	-2.50665	0.0121882	0.0257283
AC009518.1	ENSG00000224865	lncRNA	2.54418	-1.03464	0.287812	-3.59486	0.000324568	0.00104961
MRPL20-AS1	ENSG00000224870	lncRNA	661.753	-0.0160774	0.0402953	-0.398988	0.689902	0.75009
EML4-AS1	ENSG00000224875	lncRNA	6.44702	-0.590713	0.111547	-5.29564	1.18598e-07	8.52226e-07
AL121901.1	ENSG00000224876	lncRNA	0.0849191	-0.323448	0.985655	-0.328156	0.742794
AC011754.1	ENSG00000224879	lncRNA	0.0212676	-0.36584	2.03439	-0.179827	0.857288
Z99716.1	ENSG00000224883	lncRNA	0.498616	-0.358665	0.36369	-0.986185	0.324042	0.410327
AC034187.1	ENSG00000224884	lncRNA	0.342456	-0.202846	0.301519	-0.672748	0.501107	0.581369
EIPR1-IT1	ENSG00000224885	lncRNA	2.75123	-0.426964	0.159946	-2.66943	0.00759794	0.017062
AC138028.2	ENSG00000224888	lncRNA	30.3209	0.297223	0.0905807	3.28131	0.00103328	0.0029507
LINC02840	ENSG00000224893	lncRNA	0.387838	-0.446858	0.410741	-1.08793	0.276625	0.36071
POT1-AS1	ENSG00000224897	lncRNA	83.4954	-0.285034	0.10081	-2.82743	0.00469228	0.0111832
LINC02830	ENSG00000224899	lncRNA	2.52533	-0.721885	0.220178	-3.27864	0.00104309	0.00297496
AL365258.1	ENSG00000224901	lncRNA	0.659753	-2.00177	0.475146	-4.21296	2.5205e-05	0.000106789
RNF32-AS1	ENSG00000224903	lncRNA	6.83277	-0.556248	0.108032	-5.14892	2.61984e-07	1.74697e-06
AP001347.1	ENSG00000224905	lncRNA	13.5473	-0.0409964	0.0966313	-0.424256	0.671379	0.73422
LINC01766	ENSG00000224910	lncRNA	0.342244	-0.270684	0.399567	-0.677445	0.498124	0.578694
LINC00863	ENSG00000224914	lncRNA	91.9642	0.26456	0.0471772	5.6078	2.04918e-08	1.75977e-07
AC066595.1	ENSG00000224918	lncRNA	0.0211126	-0.258774	1.68544	-0.153535	0.877976
AL591684.1	ENSG00000224919	lncRNA	0.0738284	-0.259289	0.837203	-0.309708	0.756783
AL050303.1	ENSG00000224922	lncRNA	0
LINC00320	ENSG00000224924	lncRNA	0.494616	-0.612742	0.326498	-1.87671	0.0605579	0.102135
LINC02262	ENSG00000224932	lncRNA	0.283041	0.0965304	0.434347	0.222242	0.824125	0.862622
LINC01034	ENSG00000224933	lncRNA	0.395429	-0.337838	0.3219	-1.04951	0.293943	0.379168
AL391684.1	ENSG00000224934	lncRNA	103.204	-0.135877	0.102354	-1.32752	0.184336	0.259025
AL589678.1	ENSG00000224935	lncRNA	0.203492	-0.347785	0.483173	-0.719795	0.471651
LINC00184	ENSG00000224939	lncRNA	5.52884	-0.308337	0.13662	-2.25689	0.0240147	0.0462509
LINC02819	ENSG00000224943	lncRNA	0.245654	-0.271459	0.573564	-0.473285	0.63601	0.703617
CASC6	ENSG00000224944	lncRNA	1.89562	-0.577019	0.255358	-2.25965	0.0238433	0.045973
AL353150.1	ENSG00000224945	lncRNA	13.9364	0.135772	0.13407	1.0127	0.311206	0.396935
AL390066.2	ENSG00000224950	lncRNA	73.2724	-0.389214	0.0848537	-4.58689	4.49899e-06	2.26228e-05
LINC01266	ENSG00000224957	lncRNA	25.5172	0.301514	0.145135	2.07748	0.0377577	0.0682797
PGM5-AS1	ENSG00000224958	lncRNA	9.65926	0.245809	0.126149	1.94856	0.0513485	0.0887788
LINC01752	ENSG00000224961	lncRNA	6.09332	-0.27835	0.0968515	-2.87399	0.00405327	0.00982625
LINC02586	ENSG00000224965	lncRNA	17.0515	0.665855	0.0994994	6.69205	2.20068e-11	3.59643e-10
LINC01645	ENSG00000224968	lncRNA	3.41902	-0.218792	0.12653	-1.72917	0.0837781	0.134517
AL645608.1	ENSG00000224969	lncRNA	5.61195	0.0246604	0.126722	0.194603	0.845704	0.880208
AC245427.1	ENSG00000224970	lncRNA	0.129725	-0.195447	0.6396	-0.305577	0.759927
AL513412.1	ENSG00000224972	lncRNA	1.33115	-1.93216	0.266679	-7.24525	4.31642e-13	1.03342e-11
LARGE-AS1	ENSG00000224973	lncRNA	2.66095	-1.12764	0.216152	-5.21692	1.81926e-07	1.25589e-06
INE1	ENSG00000224975	lncRNA	78.4655	0.000553472	0.0835886	0.00662139	0.994717	0.996021
LINC02776	ENSG00000224977	lncRNA	2.96655	-0.174322	0.110951	-1.57116	0.116146	0.176596
AL512363.1	ENSG00000224984	lncRNA	1.16041	0.177535	0.45807	0.387572	0.698333	0.757316
AL590714.1	ENSG00000224985	lncRNA	0.867162	-0.685327	0.178485	-3.83968	0.000123192	0.000440891
FAM41AY1	ENSG00000224989	lncRNA	0.00192989	-0.322779	2.89071	-0.111661	0.911092
AL445645.1	ENSG00000224992	lncRNA	12.277	-0.0670892	0.0897748	-0.747306	0.454879	0.53802
LINC01526	ENSG00000224995	lncRNA	1.65814	-0.882845	0.171416	-5.1503	2.60076e-07	1.73576e-06
AC010082.1	ENSG00000225000	lncRNA	0.227746	-0.510537	0.440676	-1.15853	0.246648	0.328663
AL732323.1	ENSG00000225002	lncRNA	0.270543	-0.868134	0.504532	-1.72067	0.0853103	0.136587
AL929288.1	ENSG00000225006	lncRNA	0.0877425	-0.377001	0.878457	-0.429162	0.667805
AC000067.1	ENSG00000225007	lncRNA	8.19842	-0.149289	0.114744	-1.30106	0.193237	0.269065
AL121872.1	ENSG00000225012	lncRNA	0.0647299	-0.334135	0.884112	-0.377933	0.70548
AC096541.1	ENSG00000225028	lncRNA	50.7493	-0.456744	0.0976265	-4.67849	2.88998e-06	1.51939e-05
AL162586.1	ENSG00000225032	lncRNA	168.484	0.0228963	0.0926513	0.247123	0.804813	0.846798
EIF1AX-AS1	ENSG00000225037	lncRNA	1.60507	-0.629783	0.183605	-3.4301	0.000603354	0.00182858
LINC01058	ENSG00000225039	lncRNA	9.4591	0.234179	0.0894547	2.61785	0.00884864	0.0194596
AC018814.1	ENSG00000225044	lncRNA	0.0929888	-0.131168	0.717805	-0.182735	0.855006
AL355592.1	ENSG00000225050	lncRNA	0.134542	-0.238392	0.60864	-0.39168	0.695295
AL121894.1	ENSG00000225056	lncRNA	0.370436	-0.401576	0.250085	-1.60576	0.108327	0.166604
AC012485.1	ENSG00000225057	lncRNA	10.713	-0.1542	0.131404	-1.17349	0.240601	0.321982
AC092941.1	ENSG00000225058	lncRNA	0.161446	-0.0354476	0.464105	-0.0763783	0.939118
CATIP-AS1	ENSG00000225062	lncRNA	7.14409	-0.414338	0.101849	-4.06816	4.73856e-05	0.000187886
AC093422.2	ENSG00000225063	lncRNA	0.354366	-0.698926	0.40045	-1.74535	0.0809235	0.130576
LINC01802	ENSG00000225064	lncRNA	7.71108	4.1697	0.481536	8.65917	4.75224e-18	3.13785e-16
AL603832.1	ENSG00000225075	lncRNA	12.407	-0.456222	0.123507	-3.69389	0.000220847	0.000744287
WWC3-AS1	ENSG00000225076	lncRNA	1.99898	-1.54387	0.21294	-7.25028	4.15914e-13	9.98367e-12
LINC00337	ENSG00000225077	lncRNA	7.68583	-0.474093	0.112321	-4.22088	2.43351e-05	0.000103493
GRTP1-AS1	ENSG00000225083	lncRNA	9.07019	-0.257302	0.0992151	-2.59337	0.00950399	0.0207179
AL450226.1	ENSG00000225084	lncRNA	1.13512	-0.975069	0.265285	-3.67556	0.000237329	0.00079475
AL162726.1	ENSG00000225085	lncRNA	0.0299105	-0.323052	1.56686	-0.206179	0.836651
AL583808.1	ENSG00000225087	lncRNA	0.623872	-0.564531	0.273237	-2.06609	0.0388204	0.0698927
AL355336.1	ENSG00000225092	lncRNA	3.92317	0.0456367	0.136981	0.33316	0.739013	0.791986
AL445250.1	ENSG00000225096	lncRNA	5.48615	0.258383	0.116605	2.21589	0.0266988	0.0506709
AL157373.1	ENSG00000225102	lncRNA	0.0225417	-0.269501	1.67932	-0.160482	0.872502
LINC01076	ENSG00000225105	lncRNA	0.358014	-0.500571	0.413802	-1.20969	0.226399	0.30631
AL162457.2	ENSG00000225106	lncRNA	2.89522	-1.67147	0.300364	-5.56482	2.62417e-08	2.19783e-07
AC092484.1	ENSG00000225107	lncRNA	1.95512	-0.760807	0.400571	-1.89931	0.0575241	0.097763
AC083900.1	ENSG00000225111	lncRNA	8.64996	-0.952296	0.146654	-6.49349	8.38729e-11	1.2129e-09
AL157392.1	ENSG00000225112	lncRNA	1.15434	-1.08716	0.244631	-4.44409	8.82653e-06	4.15392e-05
AL355310.1	ENSG00000225113	lncRNA	0
CAMTA1-AS1	ENSG00000225126	lncRNA	1.88425	-0.391444	0.162354	-2.41105	0.0159066	0.0324445
LINC00237	ENSG00000225127	lncRNA	0.906772	-0.232324	0.21159	-1.09799	0.272207	0.355972
LINC00972	ENSG00000225128	lncRNA	0.079165	-0.334214	0.932253	-0.358502	0.719968
AL035250.1	ENSG00000225129	lncRNA	0.948857	-0.346796	0.177892	-1.94948	0.0512381	0.0886013
SLC9A3-AS1	ENSG00000225138	lncRNA	3515.46	-0.0930374	0.149531	-0.622195	0.533814	0.611201
AL358216.1	ENSG00000225140	lncRNA	44.3731	0.00989005	0.181329	0.054542	0.956503	0.967461
AC018643.1	ENSG00000225144	lncRNA	0.305219	-0.694283	0.384368	-1.8063	0.070872	0.116767
AC073957.1	ENSG00000225146	lncRNA	2.14969	-1.15599	0.198527	-5.82286	5.78487e-09	5.62935e-08
AL050338.1	ENSG00000225148	lncRNA	1.01192	-1.0701	0.296949	-3.60365	0.00031378	0.00101861
AL160290.1	ENSG00000225152	lncRNA	1.20798	-0.752026	0.208809	-3.60151	0.000316379	0.00102653
AC012354.1	ENSG00000225156	lncRNA	0.918064	0.0471594	0.245378	0.192191	0.847593	0.881862
LINC00618	ENSG00000225163	lncRNA	2.06358	-0.0701687	0.140427	-0.499681	0.6173	0.687216
AC012462.1	ENSG00000225166	lncRNA	1.93448	-0.397061	0.196401	-2.02169	0.0432083	0.0766007
AC096631.1	ENSG00000225172	lncRNA	0.310663	0.0728125	0.338231	0.215274	0.829554	0.866878
AL662890.1	ENSG00000225173	lncRNA	4.81625	-0.514709	0.144495	-3.56212	0.000367879	0.00117459
OSTM1-AS1	ENSG00000225174	lncRNA	388.194	0.0250636	0.193067	0.129818	0.896711	0.920432
AL590617.2	ENSG00000225177	lncRNA	84.215	0.0156305	0.0812652	0.192339	0.847476	0.881786
LINC00457	ENSG00000225179	lncRNA	0.371622	-0.286405	0.516541	-0.554467	0.579259	0.652764
AL121584.1	ENSG00000225181	lncRNA	0.29176	-0.893835	0.387153	-2.30874	0.0209581	0.041197
AC073283.1	ENSG00000225187	lncRNA	5.06378	-0.374956	0.1273	-2.94545	0.0032249	0.00803939
LINC00092	ENSG00000225194	lncRNA	31.1243	0.605692	0.102041	5.93575	2.92504e-09	3.04076e-08
AC078962.1	ENSG00000225195	lncRNA	2.41691	-1.57998	0.217869	-7.25194	4.10858e-13	9.87785e-12
AL139230.1	ENSG00000225203	lncRNA	0.528877	-1.98719	0.487203	-4.07878	4.5272e-05	0.00018027
AC078883.1	ENSG00000225205	lncRNA	220.189	-0.230502	0.0521325	-4.42145	9.804e-06	4.56332e-05
MIR137HG	ENSG00000225206	lncRNA	1.48866	0.716325	0.305841	2.34215	0.019173	0.0381362
AL133387.1	ENSG00000225208	lncRNA	0.821519	0.361175	0.323851	1.11525	0.264743	0.34803
AC092637.1	ENSG00000225209	lncRNA	0.469282	-0.648829	0.398644	-1.62759	0.103612	0.160543
AC073367.1	ENSG00000225213	lncRNA	7.88441	-0.388452	0.129335	-3.00344	0.00266943	0.00680751
AC079790.1	ENSG00000225214	lncRNA	0.781686	-1.36125	0.309845	-4.39331	1.11636e-05	5.12688e-05
AC007362.1	ENSG00000225216	lncRNA	5.16096	0.0279803	0.148633	0.188251	0.85068	0.884216
AP001628.1	ENSG00000225218	lncRNA	5.44047	-0.469619	0.140798	-3.33542	0.000851713	0.00248718
LINC01795	ENSG00000225226	lncRNA	0.248401	-0.555946	0.412782	-1.34683	0.178036	0.251548
AC008937.1	ENSG00000225230	lncRNA	1.36598	-0.0724062	0.135729	-0.533462	0.593714	0.665847
LINC02470	ENSG00000225231	lncRNA	2.28236	-0.0380854	0.250521	-0.152025	0.879168	0.906214
AL592402.1	ENSG00000225233	lncRNA	0.335759	-0.397862	0.287737	-1.38273	0.166748	0.238367
TRAPPC12-AS1	ENSG00000225234	lncRNA	53.3698	0.027846	0.0732859	0.379964	0.703972	0.762026
INTS6L-AS1	ENSG00000225235	lncRNA	3.4207	-0.15252	0.0949359	-1.60656	0.108151	0.166389
AL021026.1	ENSG00000225243	lncRNA	3.58493	-0.164986	0.148305	-1.11248	0.265932	0.34922
LINC00378	ENSG00000225249	lncRNA	0.115762	-0.602905	0.629392	-0.957917	0.338104
PSLNR	ENSG00000225255	lncRNA	0.488714	-0.0431656	0.310007	-0.139241	0.88926	0.914259
AC009478.1	ENSG00000225258	lncRNA	0.0728577	-0.109398	1.0601	-0.103197	0.917807
PCDH9-AS3	ENSG00000225263	lncRNA	0.0888839	-0.344861	1.04885	-0.3288	0.742307
TAF1A-AS1	ENSG00000225265	lncRNA	85.1524	-0.18799	0.0580113	-3.24057	0.00119289	0.00334556
LINC00705	ENSG00000225269	lncRNA	2.86949	-0.962506	0.192661	-4.99585	5.85763e-07	3.60767e-06
AL121987.1	ENSG00000225279	lncRNA	0.760575	-0.454296	0.191504	-2.37226	0.0176796	0.0355423
AL158013.1	ENSG00000225280	lncRNA	0.0940057	-0.13093	0.908956	-0.144045	0.885465
AC018693.1	ENSG00000225284	lncRNA	0.666561	-1.22302	0.268218	-4.55978	5.12075e-06	2.54615e-05
LINC01770	ENSG00000225285	lncRNA	50.3498	-0.0142114	0.101798	-0.139603	0.888974	0.914026
AL158212.1	ENSG00000225292	lncRNA	2.56586	-0.0994559	0.130728	-0.760784	0.446786	0.530416
LINC00113	ENSG00000225298	lncRNA	31.2017	-0.77306	0.20777	-3.72075	0.000198635	0.000676294
AL139240.1	ENSG00000225299	lncRNA	0.462813	-0.953016	0.325074	-2.93169	0.00337123	0.00836492
AL591623.1	ENSG00000225300	lncRNA	3.21131	-1.07983	0.163918	-6.5876	4.46986e-11	6.83197e-10
AL117341.1	ENSG00000225303	lncRNA	0.452533	-1.3735	0.394471	-3.48187	0.000497927	0.00153919
AL024474.2	ENSG00000225311	lncRNA	1.20323	-1.28984	0.224178	-5.75365	8.73379e-09	8.13946e-08
AL513327.1	ENSG00000225313	lncRNA	229.246	-0.323705	0.0984401	-3.28835	0.00100778	0.00288935
AL591178.1	ENSG00000225315	lncRNA	4.03547	-0.808134	0.150499	-5.36969	7.88709e-08	5.93267e-07
LINC00350	ENSG00000225316	lncRNA	0.0752562	-0.398413	0.813875	-0.489527	0.624469
LINC01427	ENSG00000225321	lncRNA	0.0194626	-0.3979	2.20308	-0.180611	0.856673
AL583804.1	ENSG00000225325	lncRNA	0.602777	-1.08046	0.312402	-3.45856	0.000543071	0.00166182
LINC01594	ENSG00000225328	lncRNA	18.5451	-0.522056	0.145196	-3.59553	0.00032373	0.00104757
LHFPL3-AS2	ENSG00000225329	lncRNA	477.571	0.309557	0.140649	2.20093	0.0277413	0.0523543
AF064860.1	ENSG00000225330	lncRNA	1.36376	-0.0722876	0.272502	-0.265274	0.790799	0.835024
LINC01678	ENSG00000225331	lncRNA	10.4897	-0.144037	0.104443	-1.3791	0.167864	0.239652
LINC02813	ENSG00000225334	lncRNA	0.442057	-0.0989611	0.224122	-0.441551	0.658815	0.723622
AC016027.1	ENSG00000225335	lncRNA	47.7953	-0.569063	0.0782506	-7.27231	3.53383e-13	8.59979e-12
AL353608.1	ENSG00000225337	lncRNA	0.0169531	-0.344348	2.06591	-0.166681	0.867621
AL354740.1	ENSG00000225339	lncRNA	16.0141	-0.229853	0.0771817	-2.97807	0.00290068	0.00732674
AC013269.1	ENSG00000225341	lncRNA	0.00521865	-0.322819	2.89071	-0.111674	0.911082
LRRK2-DT	ENSG00000225342	lncRNA	532.458	-0.161621	0.100047	-1.61546	0.106212	0.163967
FREM2-AS1	ENSG00000225350	lncRNA	1.30316	-0.858586	0.212168	-4.04672	5.19408e-05	0.000204006
AL358393.1	ENSG00000225359	lncRNA	1.98806	-0.00993148	0.159335	-0.0623308	0.950299	0.962716
PPP1R26-AS1	ENSG00000225361	lncRNA	214.642	0.0627489	0.0853346	0.735327	0.46214	0.545082
CT62	ENSG00000225362	lncRNA	5.52823	-0.776579	0.236237	-3.28729	0.00101156	0.00289948
AC078942.1	ENSG00000225365	lncRNA	7.71118	0.512963	0.162745	3.15195	0.00162185	0.00438878
TMEM246-AS1	ENSG00000225376	lncRNA	51.8509	-0.491309	0.167084	-2.94049	0.00327698	0.00815668
NRSN2-AS1	ENSG00000225377	lncRNA	200.286	-0.135895	0.0538335	-2.52437	0.0115907	0.0246532
AC015977.1	ENSG00000225378	lncRNA	25.5906	-0.0830079	0.169366	-0.49011	0.624056	0.693204
SFTA1P	ENSG00000225383	lncRNA	78.8428	-0.332765	0.119749	-2.77886	0.00545501	0.0127777
AC099754.1	ENSG00000225386	lncRNA	0.36909	-0.0305594	0.299207	-0.102135	0.91865	0.93739
AL591896.1	ENSG00000225387	lncRNA	0.267849	0.0717317	0.530114	0.135314	0.892364	0.916977
NHEG1	ENSG00000225391	lncRNA	0.682462	-0.773683	0.287928	-2.68707	0.00720817	0.0162921
BX571846.1	ENSG00000225393	lncRNA	0.673372	-0.15992	0.18385	-0.869838	0.384389	0.470227
AC121247.1	ENSG00000225399	lncRNA	11.1261	-0.0559194	0.117244	-0.47695	0.633398	0.701388
AC025188.1	ENSG00000225407	lncRNA	3.64471	-0.38482	0.121817	-3.15899	0.00158314	0.00429673
AL136980.1	ENSG00000225408	lncRNA	7.49229	-0.678849	0.121768	-5.57493	2.47628e-08	2.08743e-07
CR786580.1	ENSG00000225411	lncRNA	4.27154	-0.165161	0.114509	-1.44234	0.149206	0.21731
LINC02557	ENSG00000225413	lncRNA	0.219897	-0.134714	0.38433	-0.350517	0.72595
AL049648.1	ENSG00000225417	lncRNA	0.461041	0.252827	0.282673	0.894416	0.371099	0.457229
AC104134.1	ENSG00000225420	lncRNA	2.51513	-0.407249	0.157917	-2.57888	0.00991213	0.0214992
AC019330.1	ENSG00000225421	lncRNA	0.135591	-0.270631	0.587053	-0.460999	0.644799
AL391869.1	ENSG00000225424	lncRNA	0.24556	-0.537652	0.564745	-0.952026	0.341084	0.427766
LINC00331	ENSG00000225427	lncRNA	0.0984735	-0.430592	0.810266	-0.531421	0.595127
LINC01671	ENSG00000225431	lncRNA	1637.79	0.0639364	0.0963829	0.663358	0.507101	0.587085
LINC01504	ENSG00000225434	lncRNA	143.828	-0.230532	0.0969716	-2.37731	0.0174394	0.0351215
PACRG-AS2	ENSG00000225437	lncRNA	0.805354	-1.0602	0.424937	-2.49497	0.0125967	0.0264883
BOLA3-AS1	ENSG00000225439	lncRNA	168.792	0.121323	0.0573321	2.11614	0.0343329	0.0629787
MPRIP-AS1	ENSG00000225442	lncRNA	3.8263	-0.546919	0.15639	-3.49715	0.000470258	0.00146195
LINC01867	ENSG00000225444	lncRNA	0.176605	-0.823468	0.604612	-1.36198	0.173205
LINC01763	ENSG00000225446	lncRNA	0.534514	-0.424233	0.285307	-1.48693	0.137033	0.202495
AL021707.1	ENSG00000225450	lncRNA	9.6892	-0.362207	0.110894	-3.26624	0.00108986	0.00309237
AC073346.1	ENSG00000225457	lncRNA	102.054	-0.0630965	0.157268	-0.401202	0.688271	0.748726
AL049812.2	ENSG00000225458	lncRNA	0.0672998	-0.355508	1.05709	-0.336309	0.736638
RFPL1S	ENSG00000225465	lncRNA	19.6055	0.0413137	0.087388	0.472761	0.636383	0.703928
JPX	ENSG00000225470	lncRNA	823.016	-0.137544	0.0464389	-2.96183	0.00305819	0.00767756
AL136366.1	ENSG00000225472	lncRNA	13.2797	0.190468	0.129912	1.46613	0.142613	0.209344
ATP13A4-AS1	ENSG00000225473	lncRNA	0.268387	-0.158307	0.388259	-0.407737	0.683467	0.744596
PLCB1-IT1	ENSG00000225479	lncRNA	0.936216	-2.67661	0.446813	-5.99044	2.09277e-09	2.25168e-08
NUTM2B-AS1	ENSG00000225484	lncRNA	488.253	-0.201814	0.0487824	-4.13703	3.51831e-05	0.000144039
AC092447.4	ENSG00000225488	lncRNA	0.0522317	-0.312524	1.38845	-0.225089	0.82191
AL354707.1	ENSG00000225489	lncRNA	28.5507	-0.0958881	0.144593	-0.663157	0.50723	0.587189
LINC01107	ENSG00000225493	lncRNA	1.70082	0.0141205	0.183857	0.0768019	0.938781	0.953323
KCNMA1-AS2	ENSG00000225497	lncRNA	0.595395	-1.52851	0.362515	-4.21641	2.48219e-05	0.000105318
AC002064.1	ENSG00000225498	lncRNA	7.65765	-0.40025	0.124674	-3.21037	0.00132565	0.00367447
CYP4A22-AS1	ENSG00000225506	lncRNA	16.8211	-0.587635	0.107697	-5.4564	4.85896e-08	3.82178e-07
LINC01703	ENSG00000225518	lncRNA	20.5387	-0.442343	0.0899549	-4.91738	8.77081e-07	5.18732e-06
AL365434.1	ENSG00000225519	lncRNA	0.250884	-0.134085	0.360022	-0.372435	0.709569	0.766707
AC005237.1	ENSG00000225521	lncRNA	8.01126	-0.522775	0.121018	-4.31982	1.5616e-05	6.93936e-05
AL450384.1	ENSG00000225527	lncRNA	8.03408	-0.656925	0.130531	-5.03272	4.8357e-07	3.04174e-06
AL731684.1	ENSG00000225532	lncRNA	0.663643	-0.762813	0.249126	-3.06195	0.00219899	0.0057322
LINC01393	ENSG00000225535	lncRNA	12.5076	-0.761571	0.10673	-7.13546	9.6461e-13	2.15096e-11
AC073325.1	ENSG00000225537	lncRNA	0.0501108	-0.451767	1.10133	-0.410201	0.681659
LINC01821	ENSG00000225539	lncRNA	0.205849	-0.252087	0.499621	-0.504557	0.61387
ZNF385D-AS1	ENSG00000225542	lncRNA	0.484706	-1.13616	0.30865	-3.68105	0.000232275	0.000779375
AL162399.1	ENSG00000225545	lncRNA	0.0495305	-0.419549	1.39091	-0.301637	0.762929
LINC02476	ENSG00000225546	lncRNA	0.732042	-0.383963	0.328764	-1.1679	0.242847	0.324476
LINC01980	ENSG00000225548	lncRNA	1.5127	0.563897	0.350642	1.60818	0.107795	0.16593
NAALADL2-AS1	ENSG00000225552	lncRNA	0.246344	-0.829528	0.429344	-1.93208	0.0533494	0.0917571
AP000320.1	ENSG00000225555	lncRNA	2.37124	-0.411101	0.137292	-2.99436	0.00275022	0.00698942
AC083867.2	ENSG00000225559	lncRNA	0.538503	-0.0833154	0.309296	-0.269371	0.787644	0.832346
LINC01710	ENSG00000225561	lncRNA	0.274584	-0.0333976	0.256589	-0.13016	0.89644	0.920175
AC006076.1	ENSG00000225563	lncRNA	0.139738	-0.442305	0.644533	-0.686242	0.492561
LINC01492	ENSG00000225564	lncRNA	1.6585	-0.566486	0.245999	-2.3028	0.0212902	0.0417389
AC013733.1	ENSG00000225570	lncRNA	0.0525612	-0.32325	1.13743	-0.284192	0.776263
DOCK4-AS1	ENSG00000225572	lncRNA	3.70007	-0.74904	0.160811	-4.65788	3.19482e-06	1.66401e-05
NCBP2-AS1	ENSG00000225578	lncRNA	7.16139	-0.0388376	0.114952	-0.337858	0.73547	0.789056
EDNRB-AS1	ENSG00000225579	lncRNA	1.34201	-0.176679	0.178708	-0.98865	0.322834	0.409091
AC011193.1	ENSG00000225582	lncRNA	0.0738593	-0.226951	0.985495	-0.230291	0.817865
AC096669.1	ENSG00000225588	lncRNA	6.01009	-0.431862	0.187069	-2.30857	0.0209676	0.0412137
LINC01623	ENSG00000225595	lncRNA	2.2972	-0.482642	0.152264	-3.16976	0.00152565	0.00415644
AL606519.1	ENSG00000225598	lncRNA	0.404221	-0.793717	0.398748	-1.99052	0.0465333	0.0816113
MTOR-AS1	ENSG00000225602	lncRNA	0.879192	-0.974978	0.235007	-4.14872	3.34343e-05	0.000137617
AC092813.1	ENSG00000225605	lncRNA	1.19748	-0.930951	0.263986	-3.52652	0.000421061	0.00132564
AC005281.1	ENSG00000225606	lncRNA	13.8631	0.848845	0.196423	4.32151	1.54964e-05	6.89357e-05
AC007679.1	ENSG00000225610	lncRNA	0.465281	-0.626296	0.256945	-2.43747	0.0147904	0.0304747
LINC02158	ENSG00000225611	lncRNA	10.4642	-0.749852	0.121699	-6.16152	7.20519e-10	8.59596e-09
AC099552.2	ENSG00000225612	lncRNA	0.527686	0.472261	0.213743	2.20948	0.0271411	0.0513719
LINCMD1	ENSG00000225613	lncRNA	13.711	0.087338	0.140336	0.622351	0.533711	0.61114
MYT1L-AS1	ENSG00000225619	lncRNA	0.17718	-0.507975	0.55959	-0.907763	0.364003
AC104463.1	ENSG00000225620	lncRNA	0.351109	-0.218136	0.260925	-0.83601	0.403149	0.488573
AGBL4-IT1	ENSG00000225623	lncRNA	0.682792	-1.7111	0.324451	-5.27384	1.33598e-07	9.49148e-07
C9orf135-DT	ENSG00000225626	lncRNA	0.294695	-0.437157	0.27789	-1.57313	0.115689	0.176047
AL161644.1	ENSG00000225632	lncRNA	0.768027	-1.15807	0.279705	-4.14034	3.46793e-05	0.000142155
AP001046.1	ENSG00000225637	lncRNA	2.70509	0.341557	0.224165	1.52369	0.127587	0.190659
LINC01729	ENSG00000225640	lncRNA	0.665214	-0.354682	0.331577	-1.06968	0.284761	0.369392
AL606491.1	ENSG00000225643	lncRNA	7.78793	-0.212354	0.0764648	-2.77714	0.00548389	0.0128335
AC005487.1	ENSG00000225647	lncRNA	2.41788	-0.275625	0.157273	-1.75253	0.0796825	0.128914
AC064875.1	ENSG00000225649	lncRNA	39.2812	0.548269	0.097619	5.61641	1.94962e-08	1.68184e-07
KCNMA1-AS3	ENSG00000225652	lncRNA	2.04593	-1.45882	0.211529	-6.89653	5.32867e-12	1.0028e-10
BX255923.1	ENSG00000225655	lncRNA	1.29233	0.457301	0.208622	2.19201	0.0283789	0.0534191
AL118511.2	ENSG00000225656	lncRNA	0.219425	-0.114746	0.383165	-0.299468	0.764583
LINC01716	ENSG00000225657	lncRNA	0.60297	-0.902501	0.347056	-2.60044	0.00931034	0.0203441
CADM3-AS1	ENSG00000225670	lncRNA	48.8042	-0.272133	0.134101	-2.02931	0.0424264	0.0754131
LINC01771	ENSG00000225675	lncRNA	3.01599	-0.354603	0.145697	-2.43384	0.0149397	0.0307435
AC002378.1	ENSG00000225676	lncRNA	1.45887	-0.667978	0.177697	-3.75908	0.000170537	0.000589964
AL163953.1	ENSG00000225680	lncRNA	3.29085	-0.0396831	0.148619	-0.267011	0.78946	0.833823
PACRG-AS3	ENSG00000225683	lncRNA	1.57111	-1.48163	0.366369	-4.0441	5.25254e-05	0.000206108
FAM225B	ENSG00000225684	lncRNA	21.6533	-0.0372985	0.104479	-0.356994	0.721096	0.776672
AL008633.1	ENSG00000225689	lncRNA	2.47096	-0.383679	0.174818	-2.19473	0.0281827	0.0530978
AC114737.2	ENSG00000225703	lncRNA	2.06358	-1.62816	0.250362	-6.50322	7.86193e-11	1.14552e-09
PTPRD-AS1	ENSG00000225706	lncRNA	94.8972	0.159002	0.157102	1.0121	0.311492	0.397212
AL354984.2	ENSG00000225708	lncRNA	0.383484	-0.554601	0.443854	-1.24951	0.211478	0.289666
AC092100.1	ENSG00000225718	lncRNA	1.41057	-0.319853	0.203137	-1.57457	0.115356	0.175622
AL592166.1	ENSG00000225721	lncRNA	15.6063	-0.00723768	0.0657717	-0.110042	0.912376	0.932585
FAM66E	ENSG00000225725	lncRNA	1.55384	0.817322	0.169477	4.82262	1.41687e-06	8.00969e-06
ADGRF5-AS1	ENSG00000225730	lncRNA	1.60352	-1.0652	0.220943	-4.82115	1.42736e-06	8.06404e-06
PDE9A-AS1	ENSG00000225731	lncRNA	14.3953	0.26574	0.111716	2.37871	0.0173731	0.0350076
FGD5-AS1	ENSG00000225733	lncRNA	6078.67	0.257932	0.0415893	6.20189	5.57898e-10	6.80648e-09
NRG3-AS1	ENSG00000225738	lncRNA	0.674123	-1.09069	0.38708	-2.81773	0.00483638	0.0114836
LINC02036	ENSG00000225742	lncRNA	26.0356	-0.510151	0.125748	-4.05694	4.97191e-05	0.000196103
AC017002.1	ENSG00000225744	lncRNA	1.14253	-0.751325	0.188693	-3.98173	6.84167e-05	0.000261304
MEG8	ENSG00000225746	lncRNA	3.56134	-0.726505	0.163097	-4.45444	8.41143e-06	3.98352e-05
AL357500.1	ENSG00000225750	lncRNA	1.2495	-1.06252	0.242991	-4.37266	1.22744e-05	5.59664e-05
AC087501.1	ENSG00000225751	lncRNA	6.15217	-1.4904	0.160168	-9.30521	1.33723e-20	1.51302e-18
AL023581.1	ENSG00000225752	lncRNA	0.914685	-1.92044	0.28409	-6.75997	1.38019e-11	2.35817e-10
DBH-AS1	ENSG00000225756	lncRNA	146.311	-0.476109	0.115071	-4.13753	3.51063e-05	0.000143802
LINC00489	ENSG00000225759	lncRNA	0.0367199	-0.430156	1.40812	-0.305483	0.759998
AL596247.1	ENSG00000225761	lncRNA	3.76942	-1.16924	0.196666	-5.94532	2.75913e-09	2.88597e-08
LINC01389	ENSG00000225762	lncRNA	14.0107	-0.369903	0.104379	-3.54384	0.000394349	0.00124951
P3H2-AS1	ENSG00000225764	lncRNA	61.7636	-0.479429	0.121143	-3.95754	7.57255e-05	0.000286019
LINC01831	ENSG00000225765	lncRNA	0.150805	-0.377558	0.687675	-0.549035	0.582981
FAF1-AS1	ENSG00000225767	lncRNA	1.60223	0.139683	0.146065	0.956307	0.338917	0.425611
LINC02620	ENSG00000225768	lncRNA	0.299895	-0.298245	0.311718	-0.956779	0.338679	0.425358
AL137220.1	ENSG00000225775	lncRNA	0.136311	0.0398575	0.647939	0.0615143	0.95095
PROSER2-AS1	ENSG00000225778	lncRNA	70.6909	-0.49827	0.140496	-3.54649	0.000390395	0.0012382
MIAT	ENSG00000225783	lncRNA	440.708	-0.189849	0.147045	-1.2911	0.196671	0.273098
AL109610.1	ENSG00000225785	lncRNA	0.0785038	-0.259329	0.86047	-0.30138	0.763125
AC007953.1	ENSG00000225790	lncRNA	77.6152	-0.601561	0.154645	-3.88994	0.000100269	0.000367224
TRAM2-AS1	ENSG00000225791	lncRNA	590.661	-0.0471508	0.0431791	-1.09198	0.274841	0.358752
AC004540.2	ENSG00000225792	lncRNA	108.403	-0.618814	0.105548	-5.86289	4.54887e-09	4.52557e-08
TMEM30A-DT	ENSG00000225793	lncRNA	31.0087	0.0895035	0.0618932	1.44609	0.148151	0.216027
AC073321.1	ENSG00000225794	lncRNA	1.35355	0.161282	0.202151	0.797829	0.42497	0.509566
AC025918.1	ENSG00000225798	lncRNA	2.89777	-0.59757	0.154454	-3.86892	0.000109317	0.000396466
AL121917.1	ENSG00000225806	lncRNA	15.1911	-0.100878	0.13452	-0.749906	0.453311	0.536591
AC069281.1	ENSG00000225807	lncRNA	0.933861	-0.108938	0.256277	-0.425078	0.67078	0.733704
AL354771.1	ENSG00000225811	lncRNA	0.0920628	-0.398374	1.04705	-0.380472	0.703595
AC092669.1	ENSG00000225815	lncRNA	0.105426	-0.291785	0.592516	-0.492452	0.6224
AC118653.1	ENSG00000225818	lncRNA	0.0529096	-0.408862	1.27302	-0.321175	0.748078
AC013269.2	ENSG00000225819	lncRNA	0.0127365	-0.344309	2.48049	-0.138807	0.889603
UBXN7-AS1	ENSG00000225822	lncRNA	1.32567	-0.153782	0.180517	-0.851896	0.394272	0.480036
LINC00626	ENSG00000225826	lncRNA	62.5349	-1.04273	0.187217	-5.56963	2.55274e-08	2.144e-07
GS1-594A7.3	ENSG00000225833	lncRNA	0.987972	-0.402917	0.259582	-1.55218	0.12062	0.182005
AL157400.1	ENSG00000225836	lncRNA	1.13915	-0.199206	0.184129	-1.08188	0.279306	0.36349
TRMT2B-AS1	ENSG00000225839	lncRNA	1.05778	-0.274043	0.194329	-1.4102	0.158481	0.228516
AL355490.1	ENSG00000225850	lncRNA	4.12159	-0.22909	0.0895183	-2.55914	0.0104932	0.0226204
RUSC1-AS1	ENSG00000225855	lncRNA	283.338	-0.217312	0.0918969	-2.36474	0.0180429	0.0361678
LINC02816	ENSG00000225857	lncRNA	3.96737	-0.351544	0.119371	-2.94498	0.00322974	0.00804915
AL022315.1	ENSG00000225867	lncRNA	0.584457	0.0203727	0.22141	0.0920132	0.926688	0.943681
LINC00368	ENSG00000225870	lncRNA	0.976295	0.0270373	0.230391	0.117354	0.906579	0.928068
PSG8-AS1	ENSG00000225877	lncRNA	1.76564	-0.845681	0.321726	-2.62858	0.00857425	0.018945
AL513210.1	ENSG00000225879	lncRNA	1.91936	-0.462096	0.383361	-1.20538	0.228057	0.308055
LINC00115	ENSG00000225880	lncRNA	54.4438	-0.262803	0.0970461	-2.70802	0.00676859	0.0154333
AC009365.2	ENSG00000225881	lncRNA	0.0690885	-0.398374	1.22039	-0.326431	0.744098
LINC01456	ENSG00000225882	lncRNA	0.811148	-1.21577	0.406425	-2.99137	0.00277733	0.00705243
AC098872.1	ENSG00000225884	lncRNA	0.133655	-0.18514	0.758178	-0.244191	0.807083
AC023590.1	ENSG00000225885	lncRNA	6.4702	-0.937578	0.140425	-6.67672	2.44351e-11	3.95658e-10
AL445490.1	ENSG00000225886	lncRNA	10.3216	0.0970373	0.133583	0.72642	0.467581	0.550299
AC012368.1	ENSG00000225889	lncRNA	274.74	-0.415804	0.101443	-4.09888	4.15147e-05	0.000166714
DHDDS-AS1	ENSG00000225891	lncRNA	11.4907	-0.354404	0.100235	-3.53572	0.00040667	0.00128501
AL035404.2	ENSG00000225903	lncRNA	4.23692	-0.0569217	0.183591	-0.310046	0.756526	0.806735
AL391244.1	ENSG00000225905	lncRNA	7.44476	0.564731	0.112117	5.03697	4.7296e-07	2.98238e-06
AL138767.3	ENSG00000225913	lncRNA	7.15923	-0.0563618	0.114498	-0.492253	0.622541	0.691856
TSBP1-AS1	ENSG00000225914	lncRNA	8.35603	-0.302604	0.129472	-2.33722	0.0194276	0.0385773
AC007879.2	ENSG00000225916	lncRNA	2.49983	-0.149553	0.127557	-1.17244	0.241022	0.322419
LINC01745	ENSG00000225919	lncRNA	0.022152	-0.258774	1.59158	-0.162589	0.870842
TAB2-AS1	ENSG00000225924	lncRNA	0.339225	-0.413794	0.244078	-1.69533	0.0900121	0.142832
AC000036.1	ENSG00000225929	lncRNA	4.58622	0.033083	0.143981	0.229773	0.818268	0.857726
LINC02249	ENSG00000225930	lncRNA	1.54073	0.856628	0.28303	3.02664	0.0024729	0.00635834
AL731557.1	ENSG00000225936	lncRNA	3.00595	1.00494	0.160975	6.24286	4.29654e-10	5.36033e-09
PCA3	ENSG00000225937	lncRNA	14.6174	-0.554281	0.123632	-4.4833	7.3497e-06	3.52662e-05
AL109741.1	ENSG00000225938	lncRNA	49.3136	0.314719	0.0874266	3.59981	0.000318455	0.00103232
C5orf67	ENSG00000225940	lncRNA	12.9242	-0.216017	0.132413	-1.63139	0.102809	0.159575
LINC01875	ENSG00000225942	lncRNA	0.102033	-0.409482	0.711038	-0.575893	0.564687
AL121574.1	ENSG00000225945	lncRNA	4.36604	0.258463	0.0916822	2.81912	0.0048155	0.0114394
LINC02648	ENSG00000225948	lncRNA	2.79512	-0.338055	0.142043	-2.37995	0.0173151	0.0349067
ODF2-AS1	ENSG00000225951	lncRNA	5.02436	-0.277884	0.13647	-2.03624	0.0417267	0.0743481
AL512444.1	ENSG00000225952	lncRNA	0.257641	-0.734355	0.44993	-1.63215	0.102648	0.159401
SATB2-AS1	ENSG00000225953	lncRNA	34.6055	0.26337	0.0965001	2.72922	0.00634848	0.0145857
AL050320.1	ENSG00000225956	lncRNA	2.38312	-1.05065	0.170937	-6.14645	7.92385e-10	9.33665e-09
AL441989.1	ENSG00000225960	lncRNA	0.343326	0.0228165	0.505917	0.0450994	0.964028	0.973139
AC009950.1	ENSG00000225963	lncRNA	73.4465	-0.0840955	0.0704709	-1.19334	0.232738	0.313142
NRIR	ENSG00000225964	lncRNA	16.9494	-0.304188	0.119379	-2.5481	0.0108312	0.0232494
AL500522.1	ENSG00000225970	lncRNA	0.0265548	-0.323052	1.57695	-0.204859	0.837683
AC005550.1	ENSG00000225974	lncRNA	1.07119	-0.207038	0.336142	-0.615925	0.537944	0.615069
LINC01534	ENSG00000225975	lncRNA	69.2746	-0.00621133	0.0616056	-0.100824	0.91969	0.938094
HAR1A	ENSG00000225978	lncRNA	29.7722	-0.427914	0.109203	-3.91852	8.9095e-05	0.000330743
AC010746.2	ENSG00000225979	lncRNA	0.562528	-0.463693	0.238342	-1.94549	0.0517158	0.0893566
AC102953.1	ENSG00000225981	lncRNA	4.12684	-0.329474	0.113819	-2.89472	0.00379491	0.00927605
AL355482.2	ENSG00000225982	lncRNA	0.491492	-0.0888748	0.311939	-0.28491	0.775713	0.822468
UBXN10-AS1	ENSG00000225986	lncRNA	36.063	-0.636445	0.112371	-5.66377	1.48082e-08	1.31226e-07
LAMP5-AS1	ENSG00000225988	lncRNA	1.25155	0.30719	0.221147	1.38907	0.16481	0.236001
LINC02528	ENSG00000226004	lncRNA	8.99431	-0.372167	0.173299	-2.14755	0.0317499	0.0588864
LINC02660	ENSG00000226005	lncRNA	0.276792	-0.0175085	0.283029	-0.0618611	0.950673	0.962966
BX005266.2	ENSG00000226007	lncRNA	12.7501	-0.363715	0.111064	-3.27484	0.00105723	0.00301041
KCNIP2-AS1	ENSG00000226009	lncRNA	18.2505	-0.22794	0.0761352	-2.99388	0.00275454	0.00699845
AP001434.1	ENSG00000226012	lncRNA	7.4066	0.183007	0.107594	1.70091	0.0889599	0.141388
PRICKLE2-AS3	ENSG00000226017	lncRNA	4.30049	-0.279201	0.12618	-2.21272	0.0269168	0.0510275
AC026167.1	ENSG00000226022	lncRNA	0.588393	0.281216	0.444706	0.632364	0.527149	0.605112
AC092802.1	ENSG00000226026	lncRNA	21.9071	0.269141	0.075525	3.56359	0.000365811	0.00116847
LINC01772	ENSG00000226029	lncRNA	85.9446	-0.154661	0.0809218	-1.91123	0.0559744	0.0955902
FGF13-AS1	ENSG00000226031	lncRNA	8.60412	0.486651	0.107605	4.52256	6.10961e-06	2.98218e-05
AL035530.1	ENSG00000226032	lncRNA	3.10594	-0.499842	0.225587	-2.21574	0.0267096	0.0506849
LINC01040	ENSG00000226037	lncRNA	0.0896478	-0.452125	0.883691	-0.511632	0.608908
AC010745.1	ENSG00000226041	lncRNA	0.0863369	-0.430473	0.984574	-0.437218	0.661953
AP000561.1	ENSG00000226043	lncRNA	0.661018	-0.052251	0.335941	-0.155536	0.876399	0.904181
AL807761.3	ENSG00000226047	lncRNA	0.460268	0.044871	0.454338	0.0987612	0.921328	0.939451
ZNF503-AS1	ENSG00000226051	lncRNA	118.284	0.0833413	0.0808165	1.03124	0.302427	0.387909
LINC01776	ENSG00000226053	lncRNA	0.928349	0.99685	0.544349	1.83127	0.0670603	0.111465
AC009531.1	ENSG00000226063	lncRNA	0.0392595	-0.248285	1.29185	-0.192194	0.84759
LINC00623	ENSG00000226067	lncRNA	192.153	-0.409714	0.0699089	-5.86068	4.60964e-09	4.58005e-08
AL139275.1	ENSG00000226070	lncRNA	0.148896	-0.184999	0.632686	-0.292402	0.769979
AL356309.1	ENSG00000226078	lncRNA	0.0541573	-0.312643	0.938384	-0.333171	0.739005
AL138830.1	ENSG00000226079	lncRNA	0.0315471	-0.226715	1.74568	-0.129872	0.896668
SLC39A12-AS1	ENSG00000226083	lncRNA	0.560166	-0.835517	0.310772	-2.68852	0.00717701	0.0162313
AC073283.2	ENSG00000226087	lncRNA	3.04122	-0.408739	0.33896	-1.20586	0.22787	0.307849
HHLA3-AS1	ENSG00000226088	lncRNA	3.42256	-0.162924	0.132161	-1.23277	0.217661	0.29646
AL122017.1	ENSG00000226089	lncRNA	1.28607	-0.406681	0.1953	-2.08234	0.0373116	0.067585
LINC00937	ENSG00000226091	lncRNA	35.8177	-0.176852	0.104793	-1.68764	0.0914808	0.144797
AC099342.1	ENSG00000226097	lncRNA	1.60924	-0.295926	0.142588	-2.07539	0.03795	0.0685625
LINC02097	ENSG00000226101	lncRNA	12.7883	-0.171598	0.121245	-1.4153	0.15698	0.22673
AP001476.2	ENSG00000226115	lncRNA	0.174642	0.028017	0.445549	0.0628819	0.949861
DDC-AS1	ENSG00000226122	lncRNA	1.98679	-0.559326	0.173315	-3.22723	0.00124994	0.00348677
LINC01907	ENSG00000226125	lncRNA	7.98772	-0.160565	0.105508	-1.52182	0.128053	0.19123
AC013248.1	ENSG00000226130	lncRNA	0.0832514	-0.280741	0.77548	-0.362023	0.717335
LINC02794	ENSG00000226133	lncRNA	5.44805	-0.310279	0.143837	-2.15716	0.0309934	0.057656
AL359502.1	ENSG00000226134	lncRNA	0.414991	-0.57076	0.31907	-1.78883	0.0736427	0.120655
BAIAP2-DT	ENSG00000226137	lncRNA	2124.21	0.168071	0.0424759	3.95684	7.59466e-05	0.000286717
LINC02654	ENSG00000226140	lncRNA	0.746367	-1.20764	0.400016	-3.01898	0.00253628	0.0065067
Z98752.1	ENSG00000226143	lncRNA	0
AL356124.1	ENSG00000226149	lncRNA	8.6782	-0.664165	0.137361	-4.83518	1.33025e-06	7.57892e-06
LINC01375	ENSG00000226159	lncRNA	0.615468	-2.20592	0.548141	-4.02437	5.71287e-05	0.000222117
AL513185.1	ENSG00000226163	lncRNA	0.75815	-1.41993	0.30009	-4.73169	2.22661e-06	1.20307e-05
AP4B1-AS1	ENSG00000226167	lncRNA	23.1524	-0.146899	0.106343	-1.38137	0.167167	0.23883
AL121885.1	ENSG00000226169	lncRNA	0.0738974	-0.398453	0.795055	-0.501164	0.616256
AL139420.1	ENSG00000226172	lncRNA	2.21845	-0.116775	0.209372	-0.557736	0.577024	0.650773
LINC00685	ENSG00000226179	lncRNA	33.425	-0.312508	0.113197	-2.76075	0.00576694	0.0134083
AC010536.1	ENSG00000226180	lncRNA	24.2491	-0.303577	0.0704125	-4.3114	1.62221e-05	7.18502e-05
AL132671.1	ENSG00000226181	lncRNA	0.168991	-0.462772	0.941989	-0.491271	0.623235
AL049548.1	ENSG00000226193	lncRNA	28.4906	-0.832476	0.140944	-5.90643	3.4961e-09	3.57282e-08
LINC02519	ENSG00000226194	lncRNA	18.0558	-0.100675	0.122877	-0.819312	0.412609	0.497641
AL583785.1	ENSG00000226197	lncRNA	4.82983	0.0665689	0.173369	0.383973	0.700999	0.759563
SGMS1-AS1	ENSG00000226200	lncRNA	505.864	-0.0244364	0.0461457	-0.529549	0.596425	0.668311
LINC01733	ENSG00000226203	lncRNA	0.925647	-0.561756	0.223446	-2.51406	0.0119352	0.025265
AL157359.1	ENSG00000226204	lncRNA	0.0225628	-0.280187	1.77907	-0.157491	0.874858
BX470209.1	ENSG00000226206	lncRNA	0.438085	-0.207801	0.316704	-0.656136	0.511737	0.591212
AL080316.1	ENSG00000226207	lncRNA	0.667999	-0.419031	0.256456	-1.63393	0.102273	0.158917
AL513285.1	ENSG00000226208	lncRNA	0.150952	-0.207064	0.518879	-0.39906	0.689849
AC079163.1	ENSG00000226218	lncRNA	0.0324593	-0.355192	1.56051	-0.227613	0.819947
LEMD1-AS1	ENSG00000226235	lncRNA	2.99926	-0.0331314	0.147989	-0.223878	0.822852	0.861581
GAS1RR	ENSG00000226237	lncRNA	12.362	0.568042	0.107247	5.29656	1.18007e-07	8.48907e-07
AC132807.1	ENSG00000226238	lncRNA	0.024442	-0.290953	1.58458	-0.183615	0.854315
AL031658.1	ENSG00000226239	lncRNA	31.9172	0.288327	0.114844	2.51059	0.0120529	0.0254802
LINC00381	ENSG00000226240	lncRNA	0.439538	-0.579397	0.266886	-2.17095	0.0299348	0.0559457
ZNF32-AS1	ENSG00000226245	lncRNA	13.0328	-0.49446	0.0932	-5.30537	1.12445e-07	8.12466e-07
AL365271.1	ENSG00000226249	lncRNA	0.984043	-1.13383	0.294724	-3.8471	0.000119523	0.000429066
LINC00408	ENSG00000226250	lncRNA	0.0937979	-0.345258	0.843714	-0.409213	0.682384
LINC02608	ENSG00000226251	lncRNA	4.9004	-1.04272	0.216044	-4.82641	1.39014e-06	7.88194e-06
AL135960.1	ENSG00000226252	lncRNA	52.4462	0.508407	0.130993	3.88117	0.000103956	0.000379234
GRM7-AS3	ENSG00000226258	lncRNA	6.23865	-0.51546	0.247192	-2.08526	0.0370453	0.0671584
ISM1-AS1	ENSG00000226263	lncRNA	4.00063	-0.940145	0.154195	-6.09711	1.08e-09	1.23818e-08
AC009961.1	ENSG00000226266	lncRNA	32.0509	-0.535502	0.0695261	-7.70217	1.33774e-14	4.35994e-13
ARHGAP26-AS1	ENSG00000226272	lncRNA	7.92581	-1.29222	0.15435	-8.372	5.66498e-17	3.00106e-15
AC093382.1	ENSG00000226276	lncRNA	3.66886	-0.813623	0.135411	-6.00854	1.87206e-09	2.0362e-08
AC105393.1	ENSG00000226277	lncRNA	0.178369	-0.240277	0.563067	-0.426729	0.669576
AL031123.1	ENSG00000226281	lncRNA	15.949	0.675611	0.164642	4.10351	4.06937e-05	0.000163747
AL008733.1	ENSG00000226286	lncRNA	0.252099	-0.132091	0.383171	-0.344731	0.730297	0.784742
AC091729.2	ENSG00000226291	lncRNA	5.60051	0.00892608	0.162182	0.0550373	0.956109	0.967168
AC036101.1	ENSG00000226296	lncRNA	0.0445306	-0.398136	1.33808	-0.297543	0.766052
AC122683.1	ENSG00000226302	lncRNA	0.707408	0.0866958	0.189302	0.457975	0.64697	0.713108
AL358612.1	ENSG00000226304	lncRNA	0.216997	-0.442069	0.611123	-0.723372	0.469452
AL122058.1	ENSG00000226308	lncRNA	0.739346	0.149038	0.378738	0.393513	0.69394	0.753569
AL022157.1	ENSG00000226310	lncRNA	13.1841	-0.133315	0.07006	-1.90287	0.057058	0.0971113
CFLAR-AS1	ENSG00000226312	lncRNA	95.7552	-0.301319	0.103284	-2.91738	0.00352986	0.00871087
LINC00351	ENSG00000226317	lncRNA	0.265599	-0.292827	0.550754	-0.531684	0.594945	0.667011
LINC01811	ENSG00000226320	lncRNA	0.409656	-0.0660186	0.4252	-0.155265	0.876612	0.904279
AC006150.1	ENSG00000226323	lncRNA	0.0819104	-0.558912	1.36879	-0.408327	0.683034
NUP50-DT	ENSG00000226328	lncRNA	217.533	-0.199421	0.0730624	-2.72946	0.00634375	0.0145756
AL606489.1	ENSG00000226330	lncRNA	32.5257	0.11693	0.0855031	1.36755	0.171453	0.244001
AL354836.1	ENSG00000226332	lncRNA	187.286	-0.308621	0.10521	-2.93338	0.00335291	0.00832578
AL359182.1	ENSG00000226334	lncRNA	12.4953	0.038431	0.102608	0.374542	0.708001	0.765374
TMEM252-DT	ENSG00000226337	lncRNA	78.4357	-0.277525	0.133665	-2.07627	0.0378686	0.0684506
AC099066.1	ENSG00000226349	lncRNA	1.08736	-0.336211	0.212172	-1.58461	0.113054	0.172778
PSPC1-AS2	ENSG00000226352	lncRNA	17.4968	-0.480721	0.0898572	-5.34983	8.80355e-08	6.54255e-07
AL353803.1	ENSG00000226355	lncRNA	71.1367	0.374364	0.181823	2.05894	0.0394996	0.0709135
FAM41AY2	ENSG00000226362	lncRNA	0.00822407	-0.344271	2.89071	-0.119096	0.9052
HAGLROS	ENSG00000226363	lncRNA	77.856	0.205996	0.0954807	2.15746	0.0309697	0.0576237
LINC02089	ENSG00000226364	lncRNA	0.0722467	-0.355548	1.17225	-0.303303	0.761659
ST7-AS2	ENSG00000226367	lncRNA	4.78709	-1.01809	0.144496	-7.04579	1.84406e-12	3.84275e-11
LINC00375	ENSG00000226370	lncRNA	0.132891	-0.516349	0.774592	-0.666608	0.505023
LINC01345	ENSG00000226374	lncRNA	0.385061	-0.894063	0.418529	-2.1362	0.0326629	0.0603331
AL022310.1	ENSG00000226375	lncRNA	1.17454	-0.570384	0.173898	-3.28	0.00103807	0.00296289
AL135923.1	ENSG00000226376	lncRNA	0.0617234	-0.312643	0.907927	-0.344348	0.730585
AC084809.1	ENSG00000226377	lncRNA	4.13886	0.184735	0.12115	1.52485	0.127297	0.190275
AC016831.1	ENSG00000226380	lncRNA	77.1714	-0.993773	0.128374	-7.74121	9.84731e-15	3.277e-13
LINC01876	ENSG00000226383	lncRNA	21.626	-0.250674	0.208076	-1.20472	0.228311	0.308326
PARD3-AS1	ENSG00000226386	lncRNA	19.9978	-0.623223	0.106734	-5.83905	5.25008e-09	5.1538e-08
SORCS3-AS1	ENSG00000226387	lncRNA	0.463683	-1.25538	0.35998	-3.48737	0.000487802	0.00151075
KCNQ2-AS1	ENSG00000226390	lncRNA	0.0376666	-0.290993	1.55016	-0.187718	0.851098
C12orf77	ENSG00000226397	lncRNA	3.8729	-0.315708	0.284521	-1.10961	0.267165	0.35059
AC013480.1	ENSG00000226398	lncRNA	0.616564	0.14203	0.215888	0.657888	0.51061	0.590386
AL392089.1	ENSG00000226403	lncRNA	1.27432	-0.317917	0.193095	-1.64643	0.0996757	0.155501
AL450332.1	ENSG00000226409	lncRNA	4.14358	0.0448547	0.117392	0.382092	0.702393	0.760711
LINC02628	ENSG00000226412	lncRNA	0.50697	-0.93076	0.364745	-2.55181	0.0107165	0.0230443
MRPL23-AS1	ENSG00000226416	lncRNA	8.55444	0.484265	0.181786	2.66393	0.00772332	0.0172995
SLC16A1-AS1	ENSG00000226419	lncRNA	324.718	-0.550437	0.0786918	-6.99484	2.65552e-12	5.31151e-11
AC093642.1	ENSG00000226423	lncRNA	1.03737	-0.231579	0.223648	-1.03546	0.300453	0.385824
AL358613.1	ENSG00000226425	lncRNA	2.39477	0.152739	0.245752	0.621516	0.53426	0.61159
AC012558.1	ENSG00000226426	lncRNA	0.135917	-0.249181	0.555243	-0.448779	0.653591
AL121929.1	ENSG00000226431	lncRNA	0.388021	-0.745394	0.462109	-1.61303	0.106739	0.164648
AP000290.1	ENSG00000226433	lncRNA	0.0550705	-0.366116	1.0972	-0.333682	0.73862
AL442071.1	ENSG00000226438	lncRNA	1.07329	-1.15693	0.260648	-4.43867	9.05155e-06	4.24804e-05
LAMA4-AS1	ENSG00000226440	lncRNA	17.7394	-0.34063	0.101766	-3.3472	0.000816324	0.00239483
PLCL2-AS1	ENSG00000226441	lncRNA	0.673685	-1.66157	0.329469	-5.04317	4.57879e-07	2.89564e-06
AC006037.1	ENSG00000226442	lncRNA	0.16341	-0.270333	0.675575	-0.400152	0.689044
BX322234.1	ENSG00000226445	lncRNA	51.4804	-0.0593017	0.0752162	-0.788417	0.430453	0.514907
ZNF25-DT	ENSG00000226447	lncRNA	0.154817	-0.152965	0.545841	-0.280237	0.779296
LINC02542	ENSG00000226453	lncRNA	31.0333	-0.267978	0.146573	-1.82829	0.0675057	0.112047
AL033380.1	ENSG00000226454	lncRNA	0.981371	-1.26391	0.289666	-4.36334	1.28092e-05	5.81386e-05
AL121787.1	ENSG00000226455	lncRNA	0.785053	0.265098	0.236307	1.12183	0.261933	0.345097
AL390198.1	ENSG00000226465	lncRNA	22.198	-0.375708	0.100483	-3.73902	0.000184739	0.000634069
Z93930.2	ENSG00000226471	lncRNA	52.6836	-0.43525	0.0637923	-6.82293	8.92046e-12	1.59801e-10
LINC01748	ENSG00000226476	lncRNA	3.64267	-0.174976	0.207075	-0.844989	0.398117	0.483723
ADIPOQ-AS1	ENSG00000226482	lncRNA	0.266645	0.0407112	0.422502	0.0963574	0.923237	0.940979
AL606516.1	ENSG00000226484	lncRNA	0.425871	-0.893064	0.462527	-1.93084	0.0535033	0.0919769
LINC01035	ENSG00000226486	lncRNA	0.132319	-0.410133	0.717582	-0.571548	0.567628
AL139254.1	ENSG00000226487	lncRNA	0.103092	-0.409338	0.79429	-0.515352	0.606307
LINC01824	ENSG00000226488	lncRNA	0.049702	-0.312485	1.45745	-0.214405	0.830231
LINC00323	ENSG00000226496	lncRNA	44.1685	-0.0758344	0.174979	-0.43339	0.664731	0.728689
LINC02549	ENSG00000226497	lncRNA	0.323129	-0.509339	0.388383	-1.31143	0.189711	0.265113
AC007463.1	ENSG00000226506	lncRNA	0.921358	-0.794907	0.249064	-3.19157	0.00141499	0.00389153
LINC01918	ENSG00000226508	lncRNA	1.00919	0.190652	0.202304	0.942404	0.345986	0.432473
UPK1A-AS1	ENSG00000226510	lncRNA	2.16371	0.584103	0.226549	2.57827	0.00992972	0.0215333
FAM138B	ENSG00000226516	lncRNA	1.89663	-0.494422	0.226207	-2.18571	0.028837	0.0541679
LINC00390	ENSG00000226519	lncRNA	5.74344	-0.429592	0.129439	-3.31888	0.000903786	0.00262353
KIRREL1-IT1	ENSG00000226520	lncRNA	2.38785	-0.719016	0.174783	-4.11377	3.89247e-05	0.000157444
HDAC9-AS1	ENSG00000226522	lncRNA	0.541648	-0.781975	0.377234	-2.07291	0.0381803	0.0689025
AL049569.1	ENSG00000226526	lncRNA	0.95038	0.17902	0.170982	1.04701	0.295097	0.380305
AP000289.1	ENSG00000226527	lncRNA	5.47649	-1.30552	0.213271	-6.12143	9.2742e-10	1.07699e-08
AL158055.1	ENSG00000226530	lncRNA	12.1761	0.175301	0.143878	1.2184	0.223071	0.302542
BTBD9-AS1	ENSG00000226533	lncRNA	2.31666	-0.984725	0.217097	-4.53588	5.7364e-06	2.81618e-05
AC114814.1	ENSG00000226542	lncRNA	0.167211	0.0717771	0.541656	0.132514	0.894578
AC016722.1	ENSG00000226548	lncRNA	1.76331	-0.291623	0.139141	-2.09588	0.0360926	0.0656678
CYP4F26P	ENSG00000226562	lncRNA	1.3569	-0.424123	0.302858	-1.4004	0.161393	0.232032
AL390962.1	ENSG00000226566	lncRNA	0.022669	-0.323013	1.77855	-0.181616	0.855884
LINC00606	ENSG00000226567	lncRNA	0.550054	-0.0127422	0.348063	-0.0366088	0.970797	0.978247
AL592429.2	ENSG00000226571	lncRNA	2.24952	-0.258287	0.158998	-1.62447	0.104276	0.161441
AC060234.1	ENSG00000226576	lncRNA	1.01323	0.0394725	0.176366	0.223809	0.822906	0.861581
AL132657.1	ENSG00000226578	lncRNA	38.9664	-0.181597	0.0831684	-2.18349	0.0289996	0.0544489
LINC02848	ENSG00000226581	lncRNA	7.34803	-0.321636	0.126587	-2.54082	0.0110594	0.0236605
AC006455.1	ENSG00000226587	lncRNA	0
AL356421.2	ENSG00000226594	lncRNA	0.0890634	-0.441319	0.904103	-0.488129	0.625459
AL450344.2	ENSG00000226599	lncRNA	1.14188	-0.552555	0.213031	-2.59377	0.00949293	0.0206977
AL359979.1	ENSG00000226601	lncRNA	0.373737	-0.17073	0.227674	-0.749887	0.453323	0.536591
PAPPA-AS2	ENSG00000226604	lncRNA	10.5637	-1.01915	0.151367	-6.73295	1.66259e-11	2.78459e-10
AC092567.1	ENSG00000226605	lncRNA	0.228736	-0.571453	0.53701	-1.06414	0.287266	0.372065
AL390067.1	ENSG00000226609	lncRNA	7.26281	-0.517096	0.111713	-4.62878	3.67822e-06	1.88472e-05
AL137001.1	ENSG00000226619	lncRNA	0.0419844	-0.23752	1.54349	-0.153885	0.877701
LINC00343	ENSG00000226620	lncRNA	1.23474	-0.16611	0.256322	-0.648053	0.516951	0.595914
AC092155.1	ENSG00000226622	lncRNA	1.09822	-0.182918	0.189539	-0.965067	0.334511	0.421012
SHANK2-AS1	ENSG00000226627	lncRNA	2.65641	-0.208071	0.15713	-1.3242	0.185436	0.260146
LINC00974	ENSG00000226629	lncRNA	0.969579	-0.266717	0.269837	-0.988437	0.322939	0.409201
AL357793.1	ENSG00000226640	lncRNA	0.383745	-0.602442	0.3493	-1.72471	0.0845793	0.135625
AL513314.1	ENSG00000226643	lncRNA	0.561037	-0.729066	0.199311	-3.65792	0.000254266	0.000844801
AL121899.1	ENSG00000226644	lncRNA	25.6288	-0.445798	0.124203	-3.58926	0.000331615	0.00106961
AP006216.1	ENSG00000226645	lncRNA	0.636013	0.0254778	0.17909	0.142263	0.886872	0.912521
AL365356.1	ENSG00000226647	lncRNA	4.26691	-0.29659	0.121188	-2.44735	0.0143912	0.0297431
PLCG1-AS1	ENSG00000226648	lncRNA	26.6684	-0.226148	0.0949936	-2.38067	0.0172813	0.0348623
AC019118.1	ENSG00000226649	lncRNA	1.20262	-0.839482	0.19383	-4.33103	1.48417e-05	6.63387e-05
AC096732.1	ENSG00000226655	lncRNA	0.181541	-0.634998	0.947085	-0.670476	0.502554
AC021028.1	ENSG00000226659	lncRNA	6.72034	-0.12259	0.119334	-1.02729	0.304284	0.389789
AC004973.1	ENSG00000226661	lncRNA	1.29498	-0.358885	0.151613	-2.36711	0.0179277	0.0359699
AL020998.1	ENSG00000226664	lncRNA	0.429001	-0.362665	0.279542	-1.29735	0.194509	0.270536
AL354977.1	ENSG00000226669	lncRNA	6.58763	-0.25184	0.125046	-2.01397	0.0440125	0.0778428
LINC01108	ENSG00000226673	lncRNA	4.15729	-0.0397745	0.121775	-0.326622	0.743954	0.796258
TEX41	ENSG00000226674	lncRNA	725.174	-0.596415	0.140333	-4.25	2.1377e-05	9.20397e-05
LINC02679	ENSG00000226676	lncRNA	1.26394	-0.382264	0.180953	-2.1125	0.0346434	0.0634721
AL606748.1	ENSG00000226679	lncRNA	0.849907	0.451779	0.273476	1.65199	0.0985367	0.153992
AC073311.1	ENSG00000226680	lncRNA	2.91691	-0.559237	0.201275	-2.77847	0.00546162	0.0127912
AC020595.1	ENSG00000226681	lncRNA	0.288539	-0.851495	0.406577	-2.0943	0.0362329	0.065889
LINC01535	ENSG00000226686	lncRNA	32.7293	0.0536112	0.107171	0.500241	0.616906	0.686843
ENTPD1-AS1	ENSG00000226688	lncRNA	134.95	-0.0633475	0.0681048	-0.930147	0.352295	0.43862
AL441943.1	ENSG00000226694	lncRNA	0.359165	-0.101948	0.428677	-0.23782	0.812021	0.85262
LENG8-AS1	ENSG00000226696	lncRNA	228.745	-0.304568	0.0850327	-3.58178	0.000341261	0.00109701
AL034380.1	ENSG00000226698	lncRNA	0
AL360181.1	ENSG00000226699	lncRNA	6.0232	-0.364799	0.14696	-2.4823	0.0130538	0.0273278
MIR217HG	ENSG00000226702	lncRNA	0.798069	0.844525	0.283433	2.97963	0.00288598	0.00729358
AL161452.1	ENSG00000226706	lncRNA	15.57	-0.303989	0.110936	-2.74022	0.00613989	0.0141583
AL359458.1	ENSG00000226707	lncRNA	0.0419547	-0.269619	1.23416	-0.218464	0.827068
AC073409.1	ENSG00000226708	lncRNA	0.0537612	-0.269817	0.997852	-0.270398	0.786854
FGF12-AS3	ENSG00000226709	lncRNA	2.48033	0.508686	0.136204	3.73475	0.000187904	0.000643249
FAM66C	ENSG00000226711	lncRNA	123.946	0.0242886	0.0608518	0.399143	0.689788	0.750009
LINC01709	ENSG00000226715	lncRNA	0.208902	-0.565156	0.431759	-1.30896	0.190548
AL589986.1	ENSG00000226716	lncRNA	0.0596632	-0.216383	0.863014	-0.25073	0.802023
PTPRD-AS2	ENSG00000226717	lncRNA	0.215049	-0.639718	0.488364	-1.30992	0.190223
LINC00424	ENSG00000226722	lncRNA	0.0812571	-0.312841	0.961124	-0.325495	0.744806
PABPC1L2B-AS1	ENSG00000226725	lncRNA	0.0145405	-0.344309	2.45057	-0.140501	0.888264
AL138826.1	ENSG00000226733	lncRNA	182.92	0.0267538	0.236581	0.113085	0.909963	0.930804
AL358972.1	ENSG00000226739	lncRNA	0.0473896	-0.376763	1.28108	-0.294098	0.768683
LINC02554	ENSG00000226741	lncRNA	4.55021	1.58246	0.283328	5.58528	2.33322e-08	1.97593e-07
SMCR5	ENSG00000226746	lncRNA	4.68313	-0.59763	0.167151	-3.57539	0.000349704	0.0011214
FSIP2-AS2	ENSG00000226747	lncRNA	15.3919	-0.940196	0.13796	-6.81497	9.42808e-12	1.67519e-10
AL606760.1	ENSG00000226754	lncRNA	25.0207	0.168515	0.0596843	2.82344	0.00475119	0.0113053
AC007365.1	ENSG00000226756	lncRNA	14.0529	-0.0180544	0.0833757	-0.216542	0.828565	0.866071
PP12613	ENSG00000226757	lncRNA	6.77872	-0.150969	0.185431	-0.814155	0.415556	0.500472
DISC1-IT1	ENSG00000226758	lncRNA	1.8044	-1.08156	0.20212	-5.35106	8.74416e-08	6.50158e-07
DAB1-AS1	ENSG00000226759	lncRNA	0.69226	-1.7308	0.356623	-4.85331	1.21415e-06	6.97297e-06
LINC02668	ENSG00000226762	lncRNA	0.295989	-0.0259288	0.251869	-0.102946	0.918006	0.937021
AC010145.1	ENSG00000226764	lncRNA	0.113646	-0.313198	0.66876	-0.468327	0.639551
AC000124.1	ENSG00000226770	lncRNA	0.886869	-0.744838	0.228137	-3.26488	0.00109512	0.0031046
AP001136.1	ENSG00000226771	lncRNA	0.0561027	-0.226991	0.965575	-0.235084	0.814144
AL021393.1	ENSG00000226772	lncRNA	0
FAM30A	ENSG00000226777	lncRNA	60.0988	-0.916282	0.162281	-5.64627	1.63969e-08	1.43803e-07
NAALADL2-AS2	ENSG00000226779	lncRNA	1.04869	-1.35426	0.284061	-4.76749	1.86537e-06	1.02468e-05
AC244035.1	ENSG00000226780	lncRNA	23.0971	-0.686442	0.12545	-5.47185	4.45371e-08	3.52969e-07
AC117465.1	ENSG00000226782	lncRNA	1.9845	-0.377629	0.160082	-2.35897	0.0183256	0.0366624
LINC02611	ENSG00000226791	lncRNA	78.6088	-0.35158	0.0881255	-3.98953	6.62039e-05	0.000253487
AC005828.1	ENSG00000226797	lncRNA	1.21006	-0.384775	0.201046	-1.91386	0.0556377	0.095118
AL138749.1	ENSG00000226798	lncRNA	0.607244	-0.293792	0.282932	-1.03838	0.299092	0.384449
CACTIN-AS1	ENSG00000226800	lncRNA	20.1936	0.259888	0.0816057	3.18467	0.00144917	0.00397479
ZNF451-AS1	ENSG00000226803	lncRNA	35.1139	-0.501921	0.091447	-5.48865	4.05013e-08	3.24918e-07
LCT-AS1	ENSG00000226806	lncRNA	1.87498	-0.27136	0.167459	-1.62046	0.105133	0.162565
LINC00840	ENSG00000226808	lncRNA	13.9199	0.0522033	0.173021	0.301717	0.762868	0.812025
AL117382.2	ENSG00000226812	lncRNA	2.40065	-0.782659	0.264317	-2.96106	0.00306584	0.00769296
LINC01941	ENSG00000226813	lncRNA	0.0859	-0.344822	1.12373	-0.306855	0.758954
AC005082.1	ENSG00000226816	lncRNA	93.883	0.898222	0.168743	5.32302	1.02059e-07	7.45415e-07
MEIS1-AS3	ENSG00000226819	lncRNA	1.06331	0.00665776	0.197139	0.0337719	0.973059	0.980117
LINC02785	ENSG00000226822	lncRNA	2.84246	-0.374188	0.13478	-2.77629	0.00549838	0.0128622
AC006001.2	ENSG00000226824	lncRNA	54.1666	-0.13651	0.077799	-1.75464	0.0793203	0.128437
LINC01509	ENSG00000226825	lncRNA	0.50696	-0.312089	0.268978	-1.16028	0.245935	0.327864
LINC02774	ENSG00000226828	lncRNA	3.83202	-0.525859	0.139048	-3.78186	0.000155659	0.000543335
AC093655.1	ENSG00000226829	lncRNA	0.169805	-0.196157	0.535946	-0.366001	0.714364
AC092164.1	ENSG00000226833	lncRNA	56.0559	-0.0985618	0.0805569	-1.2235	0.221139	0.300385
ARHGAP29-AS1	ENSG00000226835	lncRNA	8.34022	-0.0544734	0.123511	-0.44104	0.659184	0.723941
AL158834.1	ENSG00000226842	lncRNA	1.07424	-0.502594	0.199856	-2.51478	0.0119107	0.025224
LINC00348	ENSG00000226846	lncRNA	0.484182	0.0168649	0.384687	0.0438406	0.965031	0.974001
AL109811.1	ENSG00000226849	lncRNA	14.4774	-0.233853	0.113223	-2.06543	0.0388828	0.0699774
AC004112.1	ENSG00000226851	lncRNA	15.8648	0.0708789	0.086264	0.82165	0.411276	0.496465
AC010894.1	ENSG00000226853	lncRNA	47.9259	-0.398567	0.0681685	-5.84678	5.01179e-09	4.93787e-08
AL451105.2	ENSG00000226854	lncRNA	0.343201	-1.08305	0.683022	-1.58567	0.112814	0.172458
THORLNC	ENSG00000226856	lncRNA	14.7512	-0.300866	0.109765	-2.74099	0.00612543	0.0141321
LINC02051	ENSG00000226859	lncRNA	0.71255	-0.18072	0.255875	-0.706284	0.480011	0.561955
AL390835.1	ENSG00000226861	lncRNA	0.110462	-0.387727	0.848961	-0.456708	0.647881
AC104463.2	ENSG00000226862	lncRNA	7.91521	-0.380024	0.128983	-2.9463	0.00321602	0.00802169
AC096637.1	ENSG00000226868	lncRNA	0.120883	-0.377381	0.891287	-0.423411	0.671995
LHFPL3-AS1	ENSG00000226869	lncRNA	22.1941	-0.436571	0.172258	-2.5344	0.0112639	0.0240454
AC135178.2	ENSG00000226871	lncRNA	8.69732	0.186672	0.132263	1.41137	0.158135	0.22811
AC002472.1	ENSG00000226872	lncRNA	0.363921	-0.482559	0.357242	-1.35079	0.176763	0.250208
AC092801.1	ENSG00000226876	lncRNA	1.14809	-0.61791	0.211499	-2.92158	0.00348265	0.00860689
AL354733.1	ENSG00000226877	lncRNA	1.23813	-0.448448	0.15975	-2.80719	0.00499763	0.0118291
AL035416.1	ENSG00000226883	lncRNA	5.83324	-0.350326	0.112591	-3.11151	0.00186136	0.00494951
AL359541.1	ENSG00000226889	lncRNA	4.51693	0.0759772	0.0955969	0.794766	0.426749	0.511332
Z97652.1	ENSG00000226890	lncRNA	0.973826	-0.613115	0.222924	-2.75033	0.00595357	0.0137849
LINC01359	ENSG00000226891	lncRNA	67.1683	-0.612791	0.120333	-5.09246	3.53441e-07	2.29244e-06
AL731577.1	ENSG00000226899	lncRNA	3.1266	-1.89548	0.223231	-8.49112	2.04653e-17	1.18709e-15
AL451069.1	ENSG00000226900	lncRNA	8.44385	-0.876124	0.19181	-4.56766	4.93199e-06	2.45923e-05
LINC00354	ENSG00000226903	lncRNA	0.0703637	-0.430553	1.22131	-0.352534	0.724438
AL353608.2	ENSG00000226904	lncRNA	0.0794442	-0.312722	0.811805	-0.385218	0.700076
TTTY4	ENSG00000226906	lncRNA	0.0126952	-0.301446	2.89071	-0.104281	0.916947
BSN-DT	ENSG00000226913	lncRNA	6.31391	-0.0564558	0.13602	-0.415055	0.678102	0.740078
LINC01276	ENSG00000226917	lncRNA	0.431294	-0.138421	0.258372	-0.535742	0.592137	0.664513
AL365184.1	ENSG00000226919	lncRNA	1.28354	-0.111637	0.360705	-0.309497	0.756944	0.807079
AL160004.1	ENSG00000226920	lncRNA	0
LINC00454	ENSG00000226921	lncRNA	0.722477	0.254816	0.267489	0.952621	0.340782	0.427438
IL1R1-AS1	ENSG00000226925	lncRNA	0.753782	-0.119974	0.193436	-0.620226	0.535109	0.612397
AL451081.1	ENSG00000226927	lncRNA	0.023084	-0.387175	2.5705	-0.150622	0.880274
LINC00161	ENSG00000226935	lncRNA	2.91848	-0.64042	0.152064	-4.21152	2.53662e-05	0.000107399
AC119428.1	ENSG00000226938	lncRNA	0.110393	-0.24892	0.938879	-0.265125	0.790913
AC062021.1	ENSG00000226939	lncRNA	0.713762	-0.771303	0.30404	-2.53684	0.0111857	0.0239047
RNF207-AS1	ENSG00000226944	lncRNA	13.8847	0.00992301	0.116223	0.0853787	0.93196	0.948014
DANCR	ENSG00000226950	lncRNA	796.665	-0.0114694	0.0729419	-0.157241	0.875055	0.903283
NCKAP5-AS2	ENSG00000226953	lncRNA	12.367	-0.0460916	0.152481	-0.302277	0.762441	0.81174
AL023802.1	ENSG00000226954	lncRNA	2.31538	-0.469608	0.207972	-2.25804	0.0239434	0.0461389
AP000432.1	ENSG00000226956	lncRNA	0.211588	-0.19757	0.468793	-0.421445	0.67343
AL358075.1	ENSG00000226957	lncRNA	5.94457	-0.659236	0.153667	-4.29003	1.7865e-05	7.83392e-05
AC078883.2	ENSG00000226963	lncRNA	2.873	-0.550482	0.182448	-3.0172	0.00255125	0.00654253
AC073114.1	ENSG00000226965	lncRNA	2.25093	-0.771776	0.188172	-4.10145	4.10578e-05	0.000165052
LINC00423	ENSG00000226968	lncRNA	1.41705	-0.326558	0.203005	-1.60862	0.107699	0.16581
AL391845.1	ENSG00000226969	lncRNA	0.712298	-0.337789	0.233304	-1.44785	0.147659	0.215454
MAGI2-AS2	ENSG00000226978	lncRNA	0.132278	-0.355985	0.709376	-0.501828	0.615789
LINC01692	ENSG00000226983	lncRNA	0.919509	-1.30325	0.314264	-4.14699	3.36875e-05	0.000138507
LINC01203	ENSG00000226985	lncRNA	0.408293	-0.118248	0.2548	-0.464082	0.642589	0.709337
AC025946.1	ENSG00000226990	lncRNA	0.474399	-0.16044	0.344963	-0.465093	0.641865	0.708684
AC145625.1	ENSG00000226992	lncRNA	0.0609448	-0.334056	1.22309	-0.273124	0.784758
AC012593.1	ENSG00000226994	lncRNA	18.833	-0.528082	0.153159	-3.44792	0.000564916	0.00172314
LINC00658	ENSG00000226995	lncRNA	1.24939	-0.779504	0.229695	-3.39365	0.000689689	0.00205905
AP000477.1	ENSG00000226996	lncRNA	0.443605	-0.282095	0.249804	-1.12926	0.258786	0.341629
AL136988.2	ENSG00000227006	lncRNA	7.82191	-0.301178	0.12455	-2.41813	0.0156005	0.0319143
LINC01247	ENSG00000227007	lncRNA	0.471645	-0.791811	0.335502	-2.36008	0.018271	0.0365643
LINC02876	ENSG00000227011	lncRNA	0.299187	-0.52344	0.402285	-1.30117	0.193201	0.269022
LINC02527	ENSG00000227012	lncRNA	0.15546	-0.410125	0.630717	-0.650252	0.515529
FKBP14-AS1	ENSG00000227014	lncRNA	7.00206	-0.165214	0.10174	-1.62388	0.104402	0.161604
LINC02796	ENSG00000227016	lncRNA	0.0952709	-0.40918	0.831829	-0.491903	0.622788
AC007036.1	ENSG00000227017	lncRNA	11.1381	-0.798936	0.125919	-6.34482	2.22691e-10	2.93811e-09
AC007557.1	ENSG00000227021	lncRNA	0.216651	-0.799708	0.632627	-1.26411	0.206191
SLC8A1-AS1	ENSG00000227028	lncRNA	20.2978	-0.972293	0.141356	-6.87834	6.05529e-12	1.12476e-10
AL139237.1	ENSG00000227029	lncRNA	0.341195	-0.98665	0.498398	-1.97964	0.0477438	0.0834501
AC019130.1	ENSG00000227033	lncRNA	0.231376	-0.487332	0.517994	-0.940805	0.346805	0.433224
LINC00511	ENSG00000227036	lncRNA	201.257	0.409612	0.128169	3.19589	0.00139402	0.00384122
ITGB2-AS1	ENSG00000227039	lncRNA	228.13	-0.547815	0.120375	-4.5509	5.34173e-06	2.64227e-05
AC003666.1	ENSG00000227042	lncRNA	0.229211	-0.11209	0.30739	-0.36465	0.715373	0.771832
LINC01682	ENSG00000227043	lncRNA	0.0441512	-0.258972	1.23407	-0.209852	0.833783
AL589765.1	ENSG00000227045	lncRNA	1.48446	-0.531541	0.140955	-3.77099	0.000162598	0.00056489
AC012065.1	ENSG00000227047	lncRNA	1.29141	-0.092231	0.261719	-0.352404	0.724535	0.779845
AL512288.1	ENSG00000227050	lncRNA	0.656749	-0.2933	0.195876	-1.49737	0.134296	0.199075
MUC12-AS1	ENSG00000227053	lncRNA	36.9506	-1.18685	0.133826	-8.86855	7.4105e-19	5.69763e-17
LINC00629	ENSG00000227060	lncRNA	31.1846	-0.455161	0.123276	-3.69221	0.00022231	0.000748966
AC079779.1	ENSG00000227061	lncRNA	0.344625	-0.327538	0.329768	-0.993239	0.320594	0.406756
Z98257.1	ENSG00000227066	lncRNA	15.4384	-1.07137	0.174979	-6.12284	9.19197e-10	1.06907e-08
AL162584.1	ENSG00000227068	lncRNA	1.46819	-0.776215	0.31824	-2.43909	0.0147244	0.0303578
EPS15-AS1	ENSG00000227070	lncRNA	6.37478	-0.525724	0.0986002	-5.33188	9.72006e-08	7.14489e-07
FOCAD-AS1	ENSG00000227071	lncRNA	1.83507	-0.148384	0.161589	-0.918282	0.358471	0.444635
AP000472.1	ENSG00000227075	lncRNA	0.153555	-0.131565	0.602611	-0.218325	0.827176
AL158166.1	ENSG00000227076	lncRNA	11.5055	-0.263455	0.0799959	-3.29335	0.000989998	0.002843
LINC02094	ENSG00000227078	lncRNA	0.765742	-0.0694175	0.245693	-0.282537	0.777532	0.823872
LINC02798	ENSG00000227082	lncRNA	19.8451	0.0996589	0.0971941	1.02536	0.305194	0.390639
L29074.1	ENSG00000227083	lncRNA	2.45435	-0.0711827	0.166476	-0.427584	0.668954	0.732091
AC012494.1	ENSG00000227088	lncRNA	4.15444	-0.579354	0.161912	-3.57819	0.000345975	0.00111085
AL031767.1	ENSG00000227089	lncRNA	0.355199	-0.498949	0.354455	-1.40765	0.159234	0.229399
AP000402.1	ENSG00000227090	lncRNA	0.172109	-0.55115	0.418794	-1.31604	0.18816
AL355990.1	ENSG00000227091	lncRNA	0.106354	-0.420398	0.628794	-0.668578	0.503765
AL512785.1	ENSG00000227094	lncRNA	1.0525	0.0235468	0.366276	0.0642872	0.948742	0.96152
AC073636.1	ENSG00000227098	lncRNA	10.0394	0.119559	0.108862	1.09825	0.272094	0.355857
AC025822.1	ENSG00000227101	lncRNA	0.0759079	-0.259328	0.777221	-0.333661	0.738635
AC104667.1	ENSG00000227107	lncRNA	8.11749	0.631938	0.108337	5.83307	5.44182e-09	5.3272e-08
LMCD1-AS1	ENSG00000227110	lncRNA	34.0528	-0.0448461	0.0782228	-0.573312	0.566433	0.641256
LINC01630	ENSG00000227115	lncRNA	1.76236	-0.74368	0.227621	-3.26718	0.00108623	0.00308437
HORMAD2-AS1	ENSG00000227117	lncRNA	12.0819	0.0132181	0.166207	0.0795278	0.936613	0.951712
LINC02672	ENSG00000227121	lncRNA	22.7841	0.252791	0.351309	0.719571	0.471789	0.554071
AP002856.1	ENSG00000227125	lncRNA	0.0815008	-0.398216	1.65763	-0.240232	0.81015
LBX1-AS1	ENSG00000227128	lncRNA	0.738879	-1.18242	0.371859	-3.17975	0.001474	0.00403335
AL139275.2	ENSG00000227131	lncRNA	3.22082	0.494477	0.201762	2.45079	0.0142543	0.0294893
AC241644.1	ENSG00000227139	lncRNA	1.01063	0.149677	0.218339	0.685524	0.493013	0.573994
LINC01153	ENSG00000227143	lncRNA	0.409027	-0.528906	0.362429	-1.45934	0.144473	0.211627
IL21-AS1	ENSG00000227145	lncRNA	20.2478	-0.772504	0.218475	-3.5359	0.000406394	0.0012845
AC069285.2	ENSG00000227148	lncRNA	0.076769	-0.323568	1.02571	-0.315456	0.752416
AL669970.2	ENSG00000227150	lncRNA	0.140953	-0.00304785	0.625698	-0.00487112	0.996113
AL161725.1	ENSG00000227155	lncRNA	65.7395	-0.21305	0.0960518	-2.21808	0.0265495	0.0504272
AC068535.1	ENSG00000227157	lncRNA	1.39002	-0.211084	0.236755	-0.891574	0.372621	0.458796
AC092755.1	ENSG00000227161	lncRNA	1.34602	-0.389368	0.168288	-2.3137	0.0206842	0.0407268
WDR11-AS1	ENSG00000227165	lncRNA	9.13137	-0.135221	0.0926155	-1.46003	0.144283	0.211416
AL442638.1	ENSG00000227167	lncRNA	0.0493648	-0.35535	1.18293	-0.300397	0.763874
Z98747.1	ENSG00000227169	lncRNA	0.0293174	-0.408666	2.13532	-0.191383	0.848225
AF178030.1	ENSG00000227170	lncRNA	1.44283	-2.22992	0.287603	-7.75349	8.94001e-15	3.00563e-13
AC011290.1	ENSG00000227172	lncRNA	1.25014	-0.208919	0.138233	-1.51136	0.130698	0.194584
AL590677.1	ENSG00000227175	lncRNA	0.991333	-0.0496097	0.225589	-0.219912	0.825939	0.863962
LINC01688	ENSG00000227181	lncRNA	0.0181025	-0.322936	2.40392	-0.134337	0.893136
AC018511.1	ENSG00000227186	lncRNA	0.932956	-0.245492	0.18731	-1.31062	0.189987	0.265378
MGAT3-AS1	ENSG00000227188	lncRNA	9.29054	-0.00492236	0.121521	-0.0405061	0.96769	0.975824
AC092535.2	ENSG00000227189	lncRNA	7.67559	-0.455155	0.181336	-2.51001	0.0120729	0.025518
AL023581.2	ENSG00000227192	lncRNA	7.5328	-0.740646	0.105717	-7.00596	2.45302e-12	4.9511e-11
AC244453.1	ENSG00000227193	lncRNA	1.55234	-0.205607	0.196716	-1.0452	0.29593	0.381186
MIR663AHG	ENSG00000227195	lncRNA	2.08507	1.15601	0.273295	4.2299	2.33793e-05	9.98353e-05
AC009365.3	ENSG00000227197	lncRNA	0.901866	-1.13563	0.249545	-4.55078	5.34463e-06	2.64284e-05
C6orf47-AS1	ENSG00000227198	lncRNA	0
ST7-AS1	ENSG00000227199	lncRNA	85.7617	0.194054	0.0634169	3.05998	0.00221351	0.00576677
AL162724.1	ENSG00000227200	lncRNA	8.36193	-0.737759	0.138881	-5.31218	1.08323e-07	7.8653e-07
AL645937.2	ENSG00000227206	lncRNA	0.044086	-0.35531	1.39873	-0.254024	0.799477
AC079145.1	ENSG00000227210	lncRNA	9.71598	0.0252762	0.0941902	0.268353	0.788428	0.833001
SPATA13-AS1	ENSG00000227213	lncRNA	1.77677	-1.36499	0.194749	-7.00897	2.40076e-12	4.8592e-11
HCG15	ENSG00000227214	lncRNA	39.1277	0.19378	0.0858417	2.25741	0.0239824	0.0461908
AL355613.1	ENSG00000227215	lncRNA	1.45088	-0.662341	0.206312	-3.21038	0.00132559	0.00367447
AL356276.1	ENSG00000227217	lncRNA	1.04691	-0.453636	0.246135	-1.84304	0.0653233	0.109044
AL157935.1	ENSG00000227218	lncRNA	36.1603	-0.433533	0.14472	-2.99566	0.00273848	0.00696266
AL133346.1	ENSG00000227220	lncRNA	4.77357	0.115886	0.108182	1.07121	0.284076	0.368643
AC017101.1	ENSG00000227227	lncRNA	3.50311	-0.600598	0.155835	-3.85406	0.000116175	0.000418488
AL606534.1	ENSG00000227230	lncRNA	8.60262	-0.181999	0.107425	-1.69419	0.090229	0.143127
AL672291.1	ENSG00000227237	lncRNA	1.46038	-0.249936	0.143951	-1.73625	0.0825196	0.132791
AL136456.1	ENSG00000227240	lncRNA	1.48139	-0.742019	0.220086	-3.3715	0.000747608	0.00221508
LINC00845	ENSG00000227244	lncRNA	2.68481	-0.251388	0.158551	-1.58553	0.112845	0.1725
AC092042.1	ENSG00000227245	lncRNA	1.34046	-0.0822564	0.160968	-0.511012	0.609343	0.680208
FAM155A-IT1	ENSG00000227248	lncRNA	0.835144	-1.49783	0.410833	-3.64585	0.000266511	0.000880631
AC012063.1	ENSG00000227252	lncRNA	41.6931	0.212926	0.0470922	4.52147	6.14129e-06	2.99573e-05
AL158834.2	ENSG00000227253	lncRNA	17.3642	-0.635211	0.105351	-6.02947	1.64498e-09	1.81418e-08
MIS18A-AS1	ENSG00000227256	lncRNA	11.9612	-0.231172	0.090273	-2.56081	0.010443	0.0225248
SMIM2-AS1	ENSG00000227258	lncRNA	1251.28	-0.503288	0.105315	-4.77887	1.76286e-06	9.74226e-06
LINC01985	ENSG00000227260	lncRNA	4.24411	0.320305	0.124576	2.57117	0.0101355	0.0219329
AL162427.1	ENSG00000227269	lncRNA	0.567498	-0.264602	0.225267	-1.17461	0.240149	0.321518
MYOCD-AS1	ENSG00000227274	lncRNA	0.211898	-0.701531	0.496255	-1.41365	0.157465
AL603839.1	ENSG00000227278	lncRNA	0.460091	-0.419745	0.224049	-1.87345	0.061006	0.102785
AC110015.1	ENSG00000227279	lncRNA	6.57103	-0.294256	0.116106	-2.53437	0.0112651	0.0240468
AL389889.1	ENSG00000227282	lncRNA	0.0591029	-0.280465	1.69082	-0.165875	0.868255
LINC01364	ENSG00000227290	lncRNA	1.07715	-1.25607	0.259197	-4.84602	1.25961e-06	7.20694e-06
AC009229.1	ENSG00000227292	lncRNA	2.10415	-1.38558	0.276988	-5.00231	5.66473e-07	3.49839e-06
AC118345.1	ENSG00000227293	lncRNA	2.37499	1.13854	0.874894	1.30134	0.193141	0.268947
AC016994.1	ENSG00000227294	lncRNA	0.178288	-0.378484	0.612722	-0.617709	0.536767
AL035541.1	ENSG00000227297	lncRNA	0.628716	-0.31973	0.257782	-1.24031	0.214861	0.293283
AL356489.1	ENSG00000227301	lncRNA	0.402106	0.104312	0.347683	0.300021	0.764161	0.813155
AC239727.1	ENSG00000227303	lncRNA	0.128669	-0.549899	0.543744	-1.01132	0.311864
AC073188.2	ENSG00000227305	lncRNA	0.00150825	-0.322779	2.89071	-0.111661	0.911092
LINC02708	ENSG00000227306	lncRNA	0.166214	-0.304025	0.416839	-0.729359	0.465782
AC010998.1	ENSG00000227307	lncRNA	0.187585	-0.272402	0.374747	-0.726897	0.467289
LINC02832	ENSG00000227308	lncRNA	2.17754	-0.369745	0.228346	-1.61923	0.105398	0.162892
LINC02630	ENSG00000227313	lncRNA	0.867663	-0.487618	0.288354	-1.69104	0.0908295	0.14393
AF130417.1	ENSG00000227330	lncRNA	0.182919	-0.303649	0.508425	-0.597235	0.55035
LINC00434	ENSG00000227336	lncRNA	0.270753	-0.0255066	0.29599	-0.0861739	0.931328	0.94754
AL139280.1	ENSG00000227338	lncRNA	2.06226	1.10083	0.211533	5.20406	1.94982e-07	1.33595e-06
LINC00307	ENSG00000227342	lncRNA	0.680778	-1.48399	0.88759	-1.67193	0.0945376	0.148803
ARHGEF7-AS1	ENSG00000227352	lncRNA	0.742574	0.235874	0.193097	1.22153	0.221884	0.301236
RBM26-AS1	ENSG00000227354	lncRNA	115.13	-0.0205025	0.0588408	-0.348441	0.727509	0.782421
AL359644.1	ENSG00000227355	lncRNA	8.76007	-0.295458	0.0950314	-3.10905	0.00187688	0.00498645
LINC00866	ENSG00000227356	lncRNA	0.771999	-0.427764	0.212022	-2.01754	0.0436388	0.0772535
AC017074.1	ENSG00000227359	lncRNA	21.8596	0.0747684	0.0654621	1.14216	0.253386	0.335954
AL512658.1	ENSG00000227360	lncRNA	0.24223	-0.495844	0.561259	-0.883449	0.376994	0.46299
AC018685.1	ENSG00000227364	lncRNA	0.10526	-0.398612	0.813052	-0.490266	0.623945
AC008060.2	ENSG00000227365	lncRNA	0.193496	-0.219244	0.738319	-0.29695	0.766504
RABGAP1L-DT	ENSG00000227373	lncRNA	6.45824	-0.208775	0.0938034	-2.22567	0.0260364	0.0495697
AL157832.1	ENSG00000227374	lncRNA	3.9123	0.0881588	0.111052	0.793851	0.427282	0.511849
DLG1-AS1	ENSG00000227375	lncRNA	5.6109	-0.269949	0.139888	-1.92975	0.0536384	0.0921698
AC091705.1	ENSG00000227386	lncRNA	0.0122449	-0.333584	2.73607	-0.121921	0.902962
AL133410.1	ENSG00000227388	lncRNA	28.2413	-0.553465	0.107059	-5.16973	2.34434e-07	1.57958e-06
HPN-AS1	ENSG00000227392	lncRNA	43.2577	-0.231769	0.134995	-1.71687	0.0860027	0.137537
KIF9-AS1	ENSG00000227398	lncRNA	81.4536	0.174611	0.071458	2.44355	0.0145435	0.0300308
AC012501.2	ENSG00000227400	lncRNA	0.223684	-0.274657	0.43406	-0.632763	0.526888	0.604917
LINC01806	ENSG00000227403	lncRNA	57.8515	0.580445	0.156778	3.70234	0.000213617	0.000721992
AC245884.1	ENSG00000227407	lncRNA	1.13521	-0.468112	0.177442	-2.63812	0.00833672	0.0184909
ZMYM4-AS1	ENSG00000227409	lncRNA	2.63275	-0.586008	0.147978	-3.9601	7.49186e-05	0.000283257
PCGEM1	ENSG00000227418	lncRNA	35.4514	-0.931702	0.300416	-3.10137	0.00192628	0.00510318
LINC01724	ENSG00000227421	lncRNA	0.942797	-0.727719	0.203153	-3.58212	0.000340819	0.0010959
CSE1L-AS1	ENSG00000227431	lncRNA	2.19525	-0.1972	0.150836	-1.30738	0.191083	0.266599
ASIC4-AS1	ENSG00000227432	lncRNA	0.446708	-0.477189	0.268343	-1.77828	0.0753583	0.123052
AP001471.1	ENSG00000227438	lncRNA	2.82254	0.190403	0.15325	1.24243	0.214077	0.292395
TTTY17B	ENSG00000227439	lncRNA	0.00317586	-0.322779	2.89071	-0.111661	0.911092
AL450345.1	ENSG00000227455	lncRNA	0.903693	-0.647334	0.301136	-2.14964	0.0315835	0.0586133
LINC00310	ENSG00000227456	lncRNA	33.1763	-0.254296	0.0811661	-3.13303	0.00173012	0.00464479
AC079612.2	ENSG00000227459	lncRNA	0.259181	-0.331395	0.435507	-0.760941	0.446692	0.530346
AL390838.1	ENSG00000227463	lncRNA	1.03374	-0.629878	0.25186	-2.5009	0.0123878	0.0260982
PDE4B-AS1	ENSG00000227466	lncRNA	0.28729	-1.23447	0.685139	-1.80177	0.071581	0.117776
LINC01537	ENSG00000227467	lncRNA	60.2859	0.45213	0.101166	4.46917	7.85242e-06	3.74354e-05
AL355300.1	ENSG00000227475	lncRNA	0.524595	-0.1145	0.44582	-0.25683	0.79731	0.840525
STK4-AS1	ENSG00000227477	lncRNA	17.0059	-0.324093	0.0617666	-5.24706	1.54542e-07	1.082e-06
AC124861.1	ENSG00000227479	lncRNA	0.815636	0.58762	0.221511	2.65278	0.00798317	0.0178106
CCDC148-AS1	ENSG00000227480	lncRNA	2.28359	-0.356782	0.147016	-2.42682	0.0152317	0.0312657
AC008080.2	ENSG00000227481	lncRNA	1.27041	-0.421971	0.202037	-2.08858	0.0367455	0.0667046
AL157702.2	ENSG00000227482	lncRNA	3.70164	0.528502	0.141462	3.736	0.000186968	0.000640438
CR559946.1	ENSG00000227484	lncRNA	2.2217	-0.33356	0.14241	-2.34225	0.0191678	0.0381277
AL162400.1	ENSG00000227485	lncRNA	0.13278	0.286447	0.931789	0.307416	0.758527
AL050309.1	ENSG00000227486	lncRNA	80.2802	0.0166057	0.0464402	0.357572	0.720663	0.776297
NCAM1-AS1	ENSG00000227487	lncRNA	3.13772	0.0245687	0.236484	0.103892	0.917255	0.936403
AC006458.1	ENSG00000227489	lncRNA	2.09324	-0.89064	0.183895	-4.8432	1.27767e-06	7.30479e-06
AL138921.1	ENSG00000227492	lncRNA	11.9785	-0.222157	0.0864356	-2.5702	0.0101638	0.0219848
KIF1C-AS1	ENSG00000227495	lncRNA	17.3836	-0.495304	0.0963503	-5.14066	2.73779e-07	1.81926e-06
AC099066.2	ENSG00000227496	lncRNA	10.712	-0.190758	0.167698	-1.13751	0.255326	0.338034
AC018359.1	ENSG00000227498	lncRNA	0.0965881	-0.494634	1.48574	-0.332921	0.739194
MROCKI	ENSG00000227502	lncRNA	344.027	-0.51748	0.0969188	-5.33932	9.32982e-08	6.88675e-07
LINC01624	ENSG00000227508	lncRNA	13.1838	0.407946	0.0793137	5.14345	2.69735e-07	1.79447e-06
LINC01839	ENSG00000227509	lncRNA	0.251924	-0.121534	0.388063	-0.31318	0.754144	0.804776
LINC01442	ENSG00000227510	lncRNA	0.120954	-0.409559	0.741294	-0.552492	0.580611
AL592301.1	ENSG00000227512	lncRNA	5.34324	-0.254496	0.120169	-2.11783	0.0341898	0.0627588
AL160163.1	ENSG00000227516	lncRNA	1.44075	-0.981132	0.228344	-4.29673	1.73339e-05	7.62292e-05
LINC01483	ENSG00000227517	lncRNA	5.11161	-0.591473	0.124279	-4.75924	1.94327e-06	1.0639e-05
AL928970.1	ENSG00000227518	lncRNA	2.13672	-0.0826482	0.137014	-0.603209	0.54637	0.622838
AL008719.1	ENSG00000227519	lncRNA	0.371769	-0.0163207	0.257373	-0.0634123	0.949438	0.96212
AC096540.1	ENSG00000227527	lncRNA	21.7616	-0.503365	0.0869326	-5.79029	7.0264e-09	6.70368e-08
DIAPH3-AS1	ENSG00000227528	lncRNA	0.15454	-0.625135	0.819805	-0.762541	0.445737
AL162414.1	ENSG00000227531	lncRNA	2.71332	-0.34784	0.184745	-1.88281	0.0597262	0.10097
SLC2A1-AS1	ENSG00000227533	lncRNA	118.017	-0.386339	0.0827022	-4.67145	2.99084e-06	1.56757e-05
AL357315.1	ENSG00000227535	lncRNA	0.382844	-0.732594	0.387666	-1.88976	0.0587905	0.0996492
DNAJC9-AS1	ENSG00000227540	lncRNA	59.3976	-0.166289	0.0704588	-2.36009	0.0182707	0.0365643
AC092614.1	ENSG00000227542	lncRNA	20.7314	0.320367	0.0739518	4.33211	1.47687e-05	6.6077e-05
SPAG5-AS1	ENSG00000227543	lncRNA	117.811	0.0406726	0.091421	0.444894	0.656397	0.721442
AC018647.1	ENSG00000227544	lncRNA	27.7122	0.106269	0.0765878	1.38754	0.165278	0.236604
AC116035.1	ENSG00000227549	lncRNA	0.16476	-0.32437	0.476819	-0.68028	0.496327
AL590422.1	ENSG00000227554	lncRNA	0.507725	-1.19233	0.328789	-3.62642	0.000287376	0.000941699
MIR4290HG	ENSG00000227555	lncRNA	2.48417	-0.0354173	0.345214	-0.102595	0.918284	0.937214
AC074257.1	ENSG00000227562	lncRNA	0.1076	-0.334413	1.02123	-0.32746	0.74332
LINC00376	ENSG00000227564	lncRNA	0.453786	-0.752878	0.35531	-2.11893	0.0340961	0.062617
AC112229.2	ENSG00000227574	lncRNA	0.0714344	-0.494515	1.58167	-0.312653	0.754544
AL136114.1	ENSG00000227579	lncRNA	2.48547	-0.223305	0.176733	-1.26352	0.206404	0.284075
CNTN4-AS2	ENSG00000227588	lncRNA	1.16358	-0.931848	0.242258	-3.84651	0.000119814	0.000429941
AL136528.1	ENSG00000227589	lncRNA	10.3976	-1.15193	0.196705	-5.85611	4.73822e-09	4.69255e-08
HSD11B1-AS1	ENSG00000227591	lncRNA	30.3718	-0.682774	0.0994644	-6.86451	6.67211e-12	1.22788e-10
Z94721.1	ENSG00000227598	lncRNA	18.2757	-0.223057	0.108793	-2.05029	0.0403364	0.0722022
PTPRT-AS1	ENSG00000227599	lncRNA	0.147897	-0.442475	0.823418	-0.537364	0.591016
AL031779.1	ENSG00000227602	lncRNA	0.226008	-0.16313	0.31301	-0.521167	0.602251	0.673768
AC005392.1	ENSG00000227606	lncRNA	0.618878	-0.614155	0.393796	-1.55958	0.11886	0.179964
FRMPD3-AS1	ENSG00000227610	lncRNA	0.0563315	-0.312444	1.17396	-0.266147	0.790126
LINC01074	ENSG00000227611	lncRNA	0.0236012	-0.237362	2.01907	-0.11756	0.906416
CERS6-AS1	ENSG00000227617	lncRNA	3.10186	-0.647983	0.135083	-4.79691	1.61128e-06	8.99265e-06
AL391056.1	ENSG00000227619	lncRNA	40.5239	-0.532944	0.14491	-3.67774	0.000235306	0.000788551
AL080276.2	ENSG00000227627	lncRNA	2.12572	-0.0516594	0.114577	-0.450871	0.652083	0.717621
LINC01132	ENSG00000227630	lncRNA	97.3578	0.328198	0.0911595	3.60026	0.000317893	0.00103079
LINC01714	ENSG00000227634	lncRNA	16.483	-0.659191	0.127224	-5.18135	2.20291e-07	1.49329e-06
SOX21-AS1	ENSG00000227640	lncRNA	5.53611	1.03782	0.163597	6.34374	2.24252e-10	2.95631e-09
STEAP2-AS1	ENSG00000227646	lncRNA	4.25136	-0.636847	0.147764	-4.30989	1.63338e-05	7.23168e-05
AC005160.1	ENSG00000227658	lncRNA	0.423728	-0.980143	0.368733	-2.65814	0.00785738	0.0175613
CLYBL-AS2	ENSG00000227659	lncRNA	1.62868	-1.48807	0.217861	-6.83037	8.46948e-12	1.52497e-10
UST-AS1	ENSG00000227660	lncRNA	0.437542	-1.32797	0.435943	-3.0462	0.00231754	0.0060074
AL162734.1	ENSG00000227673	lncRNA	0.481253	-1.10829	0.282457	-3.92376	8.71776e-05	0.000324343
LINC00355	ENSG00000227674	lncRNA	1.25045	0.104271	0.348696	0.29903	0.764917	0.813733
LINC01068	ENSG00000227676	lncRNA	3.7006	-0.686255	0.132032	-5.19763	2.01842e-07	1.37883e-06
AL355581.1	ENSG00000227678	lncRNA	12.018	-0.140698	0.0948433	-1.48348	0.137948	0.203572
AC108051.1	ENSG00000227680	lncRNA	0.301853	-0.49015	0.392686	-1.2482	0.211958	0.290216
AL033504.1	ENSG00000227681	lncRNA	3.76077	-1.14269	0.164894	-6.92981	4.214e-12	8.11696e-11
AL358394.1	ENSG00000227683	lncRNA	2.59008	0.80741	0.205798	3.92332	8.73376e-05	0.000324851
LINC02088	ENSG00000227685	lncRNA	0.299391	0.207827	0.370176	0.561426	0.574507	0.648472
AL713965.1	ENSG00000227687	lncRNA	0.142473	-0.238234	1.08393	-0.219787	0.826037
DNMBP-AS1	ENSG00000227695	lncRNA	32.4515	0.169476	0.0815857	2.07728	0.0377758	0.0683044
AP001619.1	ENSG00000227698	lncRNA	2.94326	-0.18805	0.134181	-1.40147	0.161074	0.231627
LINC00111	ENSG00000227702	lncRNA	0.486302	-0.0325207	0.287702	-0.113036	0.910002	0.930823
AL354892.1	ENSG00000227704	lncRNA	0.512122	-0.914736	0.297414	-3.07563	0.00210058	0.00551048
AL391097.2	ENSG00000227705	lncRNA	1.74796	-1.26582	0.247942	-5.10531	3.30252e-07	2.15902e-06
AL713998.1	ENSG00000227706	lncRNA	6.43564	-0.972469	0.260296	-3.73601	0.000186962	0.000640438
LINC01850	ENSG00000227708	lncRNA	0.195671	-0.250857	0.44854	-0.559275	0.575974
AL359915.1	ENSG00000227712	lncRNA	10.3811	-0.0249327	0.13587	-0.183504	0.854403	0.887361
AC092159.1	ENSG00000227713	lncRNA	0.785022	-0.427652	0.304643	-1.40378	0.160384	0.230817
AP000459.1	ENSG00000227716	lncRNA	0.932857	-0.131341	0.362873	-0.361948	0.717391	0.77347
AC016730.1	ENSG00000227718	lncRNA	1.08821	-1.97169	0.450462	-4.37704	1.20303e-05	5.49462e-05
AC006042.1	ENSG00000227719	lncRNA	32.3919	-0.0561813	0.116006	-0.484296	0.628176	0.696738
AL596188.1	ENSG00000227723	lncRNA	0.500952	-1.22372	0.306004	-3.99903	6.36013e-05	0.000244625
AP001271.1	ENSG00000227726	lncRNA	7.57238	-0.0590023	0.113643	-0.519189	0.603629	0.675079
AC239809.3	ENSG00000227733	lncRNA	16.0558	0.155591	0.096374	1.61445	0.106429	0.164253
AL590378.1	ENSG00000227734	lncRNA	0.132007	-0.516993	0.650936	-0.79423	0.427061
LINC02803	ENSG00000227740	lncRNA	9.24207	-0.83889	0.121235	-6.91955	4.53093e-12	8.66189e-11
AL121987.2	ENSG00000227741	lncRNA	20.3097	0.114684	0.0894673	1.28186	0.199893	0.276801
AC004875.1	ENSG00000227743	lncRNA	0.100443	-0.366235	1.35586	-0.270112	0.787074
LINC01940	ENSG00000227744	lncRNA	1.17633	-0.352623	0.250231	-1.40919	0.15878	0.228888
AL138916.1	ENSG00000227748	lncRNA	0.956635	-0.482621	0.277988	-1.73612	0.0825419	0.132804
RCC2-AS1	ENSG00000227751	lncRNA	0
AP000282.1	ENSG00000227757	lncRNA	5.5702	-0.177592	0.270747	-0.655934	0.511867	0.591305
LINC01693	ENSG00000227764	lncRNA	14.4429	-0.1805	0.198841	-0.90776	0.364005	0.449988
AC072062.1	ENSG00000227769	lncRNA	3.61501	-0.398399	0.148124	-2.68963	0.00715304	0.0161853
ASH1L-IT1	ENSG00000227773	lncRNA	2.12415	-1.84823	0.231932	-7.96883	1.6018e-15	6.24156e-14
AC002553.1	ENSG00000227782	lncRNA	61.1456	-0.39309	0.0872534	-4.50515	6.6325e-06	3.21345e-05
AL158198.1	ENSG00000227803	lncRNA	1.02572	-0.13613	0.166451	-0.817839	0.413449	0.498446
AL355674.1	ENSG00000227809	lncRNA	0.0203419	-0.376487	2.03876	-0.184665	0.853492
INKA2-AS1	ENSG00000227811	lncRNA	9.05521	-0.225895	0.102752	-2.19845	0.0279173	0.0526411
AL590408.1	ENSG00000227818	lncRNA	0.116519	-0.238074	0.775024	-0.307183	0.758704
AC122136.1	ENSG00000227824	lncRNA	0.205306	-0.483958	0.610283	-0.793005	0.427775
AL121885.2	ENSG00000227838	lncRNA	1.82657	-0.775201	0.1931	-4.0145	5.95707e-05	0.000230535
SUCLA2-AS1	ENSG00000227848	lncRNA	11.8872	-0.215406	0.0837622	-2.57164	0.0101218	0.0219041
AC021035.1	ENSG00000227851	lncRNA	0.178668	-0.498445	0.521305	-0.956148	0.338998
AL358075.2	ENSG00000227857	lncRNA	1.67258	0.0375366	0.168689	0.22252	0.823909	0.862435
AC002383.1	ENSG00000227863	lncRNA	0.305701	-0.195081	0.320172	-0.609301	0.542325	0.619123
AL050402.1	ENSG00000227880	lncRNA	0.144234	-0.303031	0.636596	-0.476019	0.634061
AL590652.1	ENSG00000227885	lncRNA	13.8987	0.0920319	0.100336	0.91724	0.359017	0.445119
FAM66A	ENSG00000227888	lncRNA	7.62486	0.394227	0.11225	3.51204	0.000444679	0.00139187
LINC00352	ENSG00000227893	lncRNA	0.182464	-0.271553	0.428013	-0.63445	0.525787
AL731569.1	ENSG00000227896	lncRNA	63.0335	-0.413218	0.0981416	-4.21043	2.5489e-05	0.000107869
AC062032.1	ENSG00000227902	lncRNA	0.0660434	-0.398176	1.21413	-0.327952	0.742948
SNAP25-AS1	ENSG00000227906	lncRNA	48.7832	-0.602753	0.128188	-4.70211	2.57491e-06	1.37009e-05
AL158837.1	ENSG00000227907	lncRNA	0.0753143	-0.344941	0.858937	-0.40159	0.687986
FLJ31104	ENSG00000227908	lncRNA	32.5046	-0.319366	0.081504	-3.91841	8.91341e-05	0.000330781
LINC02344	ENSG00000227911	lncRNA	1.00177	-0.974953	0.255831	-3.81092	0.000138449	0.000489227
AL441943.2	ENSG00000227912	lncRNA	0.177606	-0.494999	0.561044	-0.882283	0.377624
AL136979.1	ENSG00000227914	lncRNA	3.03742	-1.14367	0.198839	-5.75175	8.83239e-09	8.21798e-08
AL449043.1	ENSG00000227917	lncRNA	0.339221	-0.390363	0.256652	-1.52098	0.128264	0.191489
AL353597.1	ENSG00000227920	lncRNA	1.47477	-0.440856	0.202594	-2.17606	0.0295506	0.055345
LINC01655	ENSG00000227925	lncRNA	2.24894	-0.544075	0.258331	-2.10612	0.0351943	0.0643117
MACROD2-IT1	ENSG00000227927	lncRNA	0.441214	-0.878476	0.330209	-2.66037	0.00780557	0.017465
SRGAP3-AS3	ENSG00000227929	lncRNA	0.392345	-1.34347	0.502512	-2.67351	0.0075063	0.016886
AC003087.1	ENSG00000227930	lncRNA	0.868212	-0.809258	0.360966	-2.24192	0.0249665	0.0478429
AL357874.1	ENSG00000227933	lncRNA	7.28775	0.0486873	0.0977678	0.497989	0.618492	0.688108
AL390243.1	ENSG00000227935	lncRNA	0.221403	-0.0799846	0.39925	-0.200337	0.841217	0.876288
AC104695.1	ENSG00000227938	lncRNA	0.231858	-0.329086	0.370371	-0.88853	0.374256	0.460326
LINC01696	ENSG00000227940	lncRNA	0.0188163	-0.333661	2.05046	-0.162725	0.870735
PTPRK-AS1	ENSG00000227945	lncRNA	5.93324	-1.26148	0.154953	-8.14105	3.91872e-16	1.73499e-14
AC007383.1	ENSG00000227946	lncRNA	147.89	-0.203269	0.0533615	-3.80928	0.000139373	0.000492073
LINC01738	ENSG00000227947	lncRNA	68.3601	0.295341	0.127947	2.3083	0.0209823	0.0412375
LINC01341	ENSG00000227953	lncRNA	56.2068	-0.156696	0.109757	-1.42766	0.153389	0.222413
TARID	ENSG00000227954	lncRNA	18.7148	0.184243	0.122099	1.50897	0.131308	0.195314
AL390778.1	ENSG00000227958	lncRNA	0.229445	0.178128	0.461561	0.385926	0.699552	0.758333
AL451042.2	ENSG00000227959	lncRNA	16.2752	0.0800622	0.0802791	0.997298	0.31862	0.40468
AL138799.1	ENSG00000227960	lncRNA	0.523696	-0.310844	0.321816	-0.965905	0.334092	0.420589
RBM15-AS1	ENSG00000227963	lncRNA	25.9132	-0.337453	0.0582067	-5.79749	6.73161e-09	6.4563e-08
LINC01429	ENSG00000227964	lncRNA	1.69739	-0.327548	0.254568	-1.28668	0.198205	0.274837
AC012668.1	ENSG00000227981	lncRNA	0.167951	-0.387965	0.657284	-0.590255	0.55502
[truncated: 12,078 more rows]
