# Supplementary material for: BAP1-Related ceRNA (NEAT1/miR-10a-5p/SERPINE1) Promotes Proliferation and Migration of Kidney Cancer Cells
Source: Front Oncol. 2022 Mar 29;12:852515. doi: 10.3389/fonc.2022.852515 (PMC9004599; doi:10.3389/fonc.2022.852515)
Supplement: Supplementary file 6 [file Table_9.xlsx]

## Sheet: Sheet1
gene_name	gene_id	gene_biotype	baseMean	log2FoldChange	lfcSE	stat	pvalue	padj
TSPAN6	ENSG00000000003	protein_coding	2950.94	-0.0884147	0.0530812	-1.66565	0.0957833	0.150464
TNMD	ENSG00000000005	protein_coding	40.6893	-0.503553	0.171858	-2.93005	0.0033891	0.00840561
DPM1	ENSG00000000419	protein_coding	1428.67	-0.0988719	0.0375518	-2.63295	0.00846479	0.0187305
SCYL3	ENSG00000000457	protein_coding	725.041	0.0204796	0.0301497	0.679262	0.496972	0.57762
C1orf112	ENSG00000000460	protein_coding	228.499	0.0449365	0.0421109	1.0671	0.285927	0.370625
FGR	ENSG00000000938	protein_coding	1130	-0.198689	0.0695909	-2.8551	0.0043023	0.0103544
CFH	ENSG00000000971	protein_coding	5545.85	-0.136381	0.121821	-1.11952	0.262919	0.346137
FUCA2	ENSG00000001036	protein_coding	4698.78	-0.169956	0.041602	-4.08529	4.40225e-05	0.000175676
GCLC	ENSG00000001084	protein_coding	2224.57	0.1366	0.0522918	2.61227	0.00899433	0.0197289
NFYA	ENSG00000001167	protein_coding	1553.2	0.0916448	0.0325688	2.81389	0.00489466	0.01161
STPG1	ENSG00000001460	protein_coding	552.253	-0.02058	0.0411014	-0.500713	0.616573	0.686557
NIPAL3	ENSG00000001461	protein_coding	3380.77	0.188922	0.0548248	3.44592	0.00056911	0.00173466
LAS1L	ENSG00000001497	protein_coding	2474.79	-0.0320174	0.0340015	-0.941649	0.346372	0.432838
ENPP4	ENSG00000001561	protein_coding	2622.99	0.117176	0.0681853	1.71849	0.0857077	0.137113
SEMA3F	ENSG00000001617	protein_coding	6763.86	0.197355	0.0627579	3.1447	0.00166255	0.00448409
CFTR	ENSG00000001626	protein_coding	124.863	1.10263	0.14631	7.53622	4.83797e-14	1.38907e-12
ANKIB1	ENSG00000001629	protein_coding	4921.53	-0.000820166	0.0538296	-0.0152364	0.987844	0.990871
CYP51A1	ENSG00000001630	protein_coding	188.427	0.435013	0.0855925	5.08238	3.72743e-07	2.40503e-06
KRIT1	ENSG00000001631	protein_coding	2067.4	-0.0731261	0.0409762	-1.7846	0.0743265	0.121623
RAD52	ENSG00000002016	protein_coding	560.851	-0.0931028	0.0600548	-1.5503	0.12107	0.182581
BAD	ENSG00000002330	protein_coding	2272.2	-0.383148	0.0655116	-5.84855	4.95866e-09	4.89287e-08
LAP3	ENSG00000002549	protein_coding	7008.66	-0.0635623	0.0591542	-1.07452	0.28259	0.36712
CD99	ENSG00000002586	protein_coding	10306.2	-0.173685	0.0598286	-2.90304	0.00369563	0.00906335
HS3ST1	ENSG00000002587	protein_coding	875.95	0.102934	0.090759	1.13415	0.256733	0.339436
AOC1	ENSG00000002726	protein_coding	18680	-0.309035	0.169207	-1.82637	0.0677951	0.112445
WNT16	ENSG00000002745	protein_coding	6.77199	-0.656324	0.138564	-4.73659	2.17339e-06	1.17709e-05
HECW1	ENSG00000002746	protein_coding	97.4731	0.0164737	0.150059	0.109781	0.912583	0.932734
MAD1L1	ENSG00000002822	protein_coding	1341.88	-0.127765	0.047717	-2.67754	0.0074164	0.0167068
LASP1	ENSG00000002834	protein_coding	16502.6	0.115856	0.0361207	3.20746	0.00133911	0.0037082
SNX11	ENSG00000002919	protein_coding	1454.98	-0.0951929	0.0350643	-2.71481	0.00663142	0.0151522
TMEM176A	ENSG00000002933	protein_coding	31161	-0.523607	0.0863474	-6.06396	1.32808e-09	1.49484e-08
M6PR	ENSG00000003056	protein_coding	4945.62	0.126679	0.0510844	2.47979	0.0131461	0.0274908
KLHL13	ENSG00000003096	protein_coding	673.866	0.0753469	0.085184	0.884519	0.376416	0.462412
CYP26B1	ENSG00000003137	protein_coding	439.697	0.444899	0.102955	4.32131	1.55107e-05	6.89925e-05
ICA1	ENSG00000003147	protein_coding	746.013	0.0795959	0.0738795	1.07738	0.281313	0.365699
DBNDD1	ENSG00000003249	protein_coding	1227.37	0.125666	0.0903883	1.39029	0.16444	0.235596
ALS2	ENSG00000003393	protein_coding	1740.46	0.145671	0.0348653	4.17811	2.9394e-05	0.000122428
CASP10	ENSG00000003400	protein_coding	1784.48	-0.00723797	0.0423448	-0.170929	0.864279	0.895002
CFLAR	ENSG00000003402	protein_coding	12579.3	-0.067618	0.0462807	-1.46104	0.144004	0.211093
TFPI	ENSG00000003436	protein_coding	13562.9	-0.340459	0.101799	-3.34443	0.000824507	0.00241574
NDUFAF7	ENSG00000003509	protein_coding	722.763	-0.116234	0.0328689	-3.5363	0.000405776	0.00128272
RBM5	ENSG00000003756	protein_coding	3443.92	0.163814	0.0516963	3.16877	0.00153084	0.00416934
MTMR7	ENSG00000003987	protein_coding	123.362	-0.493391	0.0691352	-7.13661	9.56631e-13	2.13629e-11
SLC7A2	ENSG00000003989	protein_coding	4166.58	0.0481262	0.113259	0.424923	0.670893	0.733811
ARF5	ENSG00000004059	protein_coding	6186.38	-0.356988	0.0498626	-7.15945	8.10029e-13	1.83938e-11
SARM1	ENSG00000004139	protein_coding	650.167	0.172259	0.0471125	3.65633	0.00025585	0.000849446
POLDIP2	ENSG00000004142	protein_coding	6615.71	-0.156613	0.0403688	-3.87956	0.000104647	0.000381478
PLXND1	ENSG00000004399	protein_coding	15509.8	0.426944	0.0620776	6.87759	6.08716e-12	1.13022e-10
AK2	ENSG00000004455	protein_coding	7716.03	-0.282044	0.0348362	-8.0963	5.6654e-16	2.42397e-14
CD38	ENSG00000004468	protein_coding	528.224	-0.426903	0.113408	-3.7643	0.000167016	0.000579052
FKBP4	ENSG00000004478	protein_coding	5619.99	-0.0666213	0.0466042	-1.42951	0.152856	0.221774
KDM1A	ENSG00000004487	protein_coding	2998.58	0.157502	0.0279878	5.62752	1.82822e-08	1.58817e-07
RBM6	ENSG00000004534	protein_coding	3301.12	0.0136721	0.071576	0.191015	0.848514	0.882545
CAMKK1	ENSG00000004660	protein_coding	951.155	0.155334	0.0577999	2.68745	0.00720008	0.0162763
RECQL	ENSG00000004700	protein_coding	1714.05	0.249601	0.0580115	4.30261	1.68796e-05	7.43957e-05
VPS50	ENSG00000004766	protein_coding	1408.62	-0.101354	0.0421049	-2.40717	0.0160768	0.032738
HSPB6	ENSG00000004776	protein_coding	682.726	0.49982	0.146824	3.40421	0.000663564	0.00198948
ARHGAP33	ENSG00000004777	protein_coding	693.396	-0.165795	0.100432	-1.65083	0.0987737	0.1543
NDUFAB1	ENSG00000004779	protein_coding	2599.48	-0.196258	0.0501087	-3.91665	8.97898e-05	0.000332837
PDK4	ENSG00000004799	protein_coding	43613.5	0.0839732	0.139736	0.600942	0.547878	0.624262
SLC22A16	ENSG00000004809	protein_coding	16.9934	0.749853	0.138654	5.4081	6.36953e-08	4.8858e-07
ZMYND10	ENSG00000004838	protein_coding	199.658	-0.118051	0.106714	-1.10623	0.268626	0.352233
ABCB5	ENSG00000004846	protein_coding	25.7218	1.04127	0.214685	4.85022	1.23324e-06	7.06928e-06
ARX	ENSG00000004848	protein_coding	58.3992	-1.5498	0.284616	-5.44523	5.17371e-08	4.03837e-07
SLC25A13	ENSG00000004864	protein_coding	2316.81	-0.0100637	0.0440602	-0.228408	0.819329	0.858602
ST7	ENSG00000004866	protein_coding	2344.77	-0.169479	0.0541948	-3.12722	0.00176466	0.00472317
CDC27	ENSG00000004897	protein_coding	3665.44	0.10594	0.0356397	2.97252	0.00295368	0.00744291
SLC4A1	ENSG00000004939	protein_coding	317.331	1.14672	0.235807	4.86297	1.15637e-06	6.66537e-06
CALCR	ENSG00000004948	protein_coding	404.418	-0.071514	0.165856	-0.431181	0.666337	0.730047
HCCS	ENSG00000004961	protein_coding	1353.87	-0.0667037	0.0595306	-1.12049	0.262503	0.345669
DVL2	ENSG00000004975	protein_coding	1609.78	0.163198	0.0341558	4.77805	1.77006e-06	9.77717e-06
PRSS22	ENSG00000005001	protein_coding	23.6386	1.28311	0.230059	5.57734	2.44228e-08	2.06143e-07
UPF1	ENSG00000005007	protein_coding	5572.55	0.159185	0.0300857	5.29104	1.2162e-07	8.72163e-07
SKAP2	ENSG00000005020	protein_coding	5670.28	-0.0462846	0.0554392	-0.834871	0.40379	0.489259
SLC25A5	ENSG00000005022	protein_coding	12037.4	0.17663	0.0816918	2.16215	0.0306068	0.0570365
MCUB	ENSG00000005059	protein_coding	686.032	-0.383851	0.0759162	-5.05625	4.27575e-07	2.72279e-06
HOXA11	ENSG00000005073	protein_coding	109.239	0.0261949	0.11422	0.229338	0.818606	0.857982
POLR2J	ENSG00000005075	protein_coding	1714.57	-0.655652	0.0668124	-9.81332	9.86717e-23	1.62645e-20
DHX33	ENSG00000005100	protein_coding	1253.79	0.156431	0.0306363	5.10606	3.28947e-07	2.15123e-06
MEOX1	ENSG00000005102	protein_coding	53.7632	0.0660638	0.121921	0.541856	0.587918	0.660932
THSD7A	ENSG00000005108	protein_coding	1866.22	0.695588	0.105693	6.58123	4.66579e-11	7.10788e-10
LIG3	ENSG00000005156	protein_coding	1123.99	0.0756396	0.0303414	2.49295	0.0126687	0.0266128
RPAP3	ENSG00000005175	protein_coding	1175.59	-0.0214001	0.0337464	-0.634146	0.525985	0.604125
ACSM3	ENSG00000005187	protein_coding	1637.45	-0.119094	0.0831087	-1.43299	0.15186	0.22058
REXO5	ENSG00000005189	protein_coding	212.649	-0.175447	0.0534453	-3.28274	0.00102803	0.00293858
CIAPIN1	ENSG00000005194	protein_coding	2299.2	-0.0237926	0.0401272	-0.59293	0.553228	0.62931
SPPL2B	ENSG00000005206	protein_coding	2839.19	-0.288029	0.0614966	-4.68366	2.81793e-06	1.48629e-05
FAM214B	ENSG00000005238	protein_coding	1514.93	-0.0274978	0.0419272	-0.655846	0.511923	0.591323
COPZ2	ENSG00000005243	protein_coding	1091.8	-0.219826	0.0797524	-2.75635	0.00584503	0.0135699
PRKAR2B	ENSG00000005249	protein_coding	383.253	0.165306	0.0738978	2.23696	0.0252891	0.048372
MSL3	ENSG00000005302	protein_coding	1456.68	0.0280526	0.0300719	0.932849	0.350898	0.437348
CREBBP	ENSG00000005339	protein_coding	6090.63	0.283327	0.030927	9.16113	5.13581e-20	5.22985e-18
TSPOAP1	ENSG00000005379	protein_coding	996.195	0.273197	0.0903217	3.02471	0.00248873	0.00639545
MPO	ENSG00000005381	protein_coding	16.2001	-0.125761	0.137068	-0.91751	0.358875	0.444992
PON1	ENSG00000005421	protein_coding	6.53075	-0.439508	0.165919	-2.64893	0.00807472	0.0179838
GCFC2	ENSG00000005436	protein_coding	1344.68	-0.175674	0.037309	-4.70862	2.494e-06	1.33106e-05
WDR54	ENSG00000005448	protein_coding	1826.52	-0.0983309	0.0685292	-1.43488	0.151322	0.219965
CROT	ENSG00000005469	protein_coding	1016.99	-0.0353105	0.0495296	-0.712918	0.475896	0.557993
ABCB4	ENSG00000005471	protein_coding	366.95	0.165781	0.117719	1.40827	0.15905	0.229185
KMT2E	ENSG00000005483	protein_coding	5803.13	0.125099	0.038089	3.28439	0.00102205	0.00292405
RHBDD2	ENSG00000005486	protein_coding	4693.41	-0.266973	0.0592764	-4.50386	6.67302e-06	3.23069e-05
SOX8	ENSG00000005513	protein_coding	65.423	1.07523	0.133647	8.04526	8.60643e-16	3.55619e-14
IBTK	ENSG00000005700	protein_coding	3966.03	0.066114	0.0416246	1.58834	0.11221	0.171695
ZNF195	ENSG00000005801	protein_coding	1328.86	-0.361579	0.0374525	-9.65434	4.71197e-22	6.9652e-20
MYCBP2	ENSG00000005810	protein_coding	3892.81	0.295104	0.0582085	5.06977	3.9829e-07	2.55262e-06
FBXL3	ENSG00000005812	protein_coding	4160.86	0.116714	0.0493112	2.36689	0.0179381	0.0359846
ITGAL	ENSG00000005844	protein_coding	2598.8	-0.228388	0.089201	-2.56038	0.0104559	0.0225483
PDK2	ENSG00000005882	protein_coding	3043.74	0.0958676	0.0587335	1.63225	0.102628	0.159379
ITGA3	ENSG00000005884	protein_coding	20831.8	-0.193504	0.0798475	-2.42341	0.0153754	0.0315241
ZFX	ENSG00000005889	protein_coding	2044	0.198456	0.0431708	4.59701	4.28603e-06	2.16756e-05
LAMP2	ENSG00000005893	protein_coding	15885.5	-0.10208	0.0506991	-2.01346	0.0440667	0.0779177
ITGA2B	ENSG00000005961	protein_coding	75.5147	-0.223364	0.107486	-2.07807	0.0377025	0.0681962
ASB4	ENSG00000005981	protein_coding	35.7371	-0.903674	0.192293	-4.69947	2.60836e-06	1.3858e-05
GDE1	ENSG00000006007	protein_coding	3306.18	-0.0249877	0.0608914	-0.410365	0.681538	0.743095
REX1BD	ENSG00000006015	protein_coding	1137.09	-0.380459	0.0758941	-5.01303	5.35809e-07	3.33056e-06
CRLF1	ENSG00000006016	protein_coding	171.226	0.413296	0.118906	3.47582	0.000509301	0.00157086
OSBPL7	ENSG00000006025	protein_coding	705.371	0.00629457	0.0624297	0.100827	0.919688	0.938094
TMEM98	ENSG00000006042	protein_coding	2757.42	0.00587198	0.0874758	0.0671269	0.946481	0.959616
YBX2	ENSG00000006047	protein_coding	191.591	-0.576557	0.141444	-4.07622	4.57746e-05	0.000182034
KRT33A	ENSG00000006059	protein_coding	2.4382	-0.696303	0.249338	-2.79261	0.00522852	0.012307
MAP3K14	ENSG00000006062	protein_coding	2588.43	-0.170086	0.0681445	-2.49596	0.0125618	0.0264222
ABCC8	ENSG00000006071	protein_coding	17.3767	0.0619136	0.147593	0.419487	0.67486	0.737217
CACNG3	ENSG00000006116	protein_coding	1.1585	-0.560699	0.223582	-2.5078	0.0121485	0.0256563
TMEM132A	ENSG00000006118	protein_coding	2159.06	-0.246568	0.0928994	-2.65414	0.00795118	0.01775
AP2B1	ENSG00000006125	protein_coding	14507.5	0.253386	0.0329909	7.68048	1.58492e-14	5.04707e-13
TAC1	ENSG00000006128	protein_coding	6.13245	0.344835	0.27466	1.25549	0.209299	0.287266
ZNF263	ENSG00000006194	protein_coding	1728.04	0.0774533	0.0280076	2.76544	0.00568467	0.0132411
CX3CL1	ENSG00000006210	protein_coding	13861.8	0.157269	0.0693143	2.26892	0.0232731	0.0450443
SPATA20	ENSG00000006282	protein_coding	5101.7	-0.287638	0.0521669	-5.51381	3.5115e-08	2.85303e-07
CACNA1G	ENSG00000006283	protein_coding	9.64138	-0.2572	0.138078	-1.86271	0.0625029	0.104975
TNFRSF12A	ENSG00000006327	protein_coding	5438.48	-0.420984	0.0963758	-4.36815	1.25301e-05	5.70075e-05
DLX6	ENSG00000006377	protein_coding	29.0953	0.106784	0.106346	1.00411	0.315325	0.401296
MAP3K9	ENSG00000006432	protein_coding	288.543	0.738132	0.0975303	7.56823	3.78353e-14	1.11297e-12
RALA	ENSG00000006451	protein_coding	3273.18	0.0275638	0.0495538	0.556239	0.578047	0.651718
BAIAP2L1	ENSG00000006453	protein_coding	972.288	-0.0756444	0.110205	-0.686398	0.492462	0.573425
KDM7A	ENSG00000006459	protein_coding	1834.81	0.0752803	0.0504336	1.49266	0.135525	0.200617
ETV1	ENSG00000006468	protein_coding	738.707	0.0226179	0.100407	0.225262	0.821775	0.860771
AGK	ENSG00000006530	protein_coding	1773.69	-0.0801647	0.0337559	-2.37484	0.0175566	0.0353245
ALDH3B1	ENSG00000006534	protein_coding	3309.03	-0.262254	0.0736789	-3.55942	0.000371681	0.00118557
TTC22	ENSG00000006555	protein_coding	1027.7	-0.380508	0.0844718	-4.50456	6.65111e-06	3.22144e-05
PHTF2	ENSG00000006576	protein_coding	1479.3	-0.0924231	0.0450836	-2.05004	0.0403608	0.0722342
CCL26	ENSG00000006606	protein_coding	20.3327	-0.0730989	0.139449	-0.524197	0.600141	0.671867
FARP2	ENSG00000006607	protein_coding	1400.47	0.196039	0.0436964	4.48638	7.2444e-06	3.4801e-05
USH1C	ENSG00000006611	protein_coding	8553.64	-0.335058	0.104178	-3.21621	0.00129896	0.00361013
GGCT	ENSG00000006625	protein_coding	890.132	-0.344887	0.0461129	-7.47919	7.47795e-14	2.06427e-12
DBF4	ENSG00000006634	protein_coding	364.953	-0.152171	0.0685185	-2.22087	0.0263596	0.0501163
TBXA2R	ENSG00000006638	protein_coding	554.562	0.39525	0.0776278	5.09161	3.55036e-07	2.30115e-06
IFRD1	ENSG00000006652	protein_coding	2066.41	-0.140254	0.055191	-2.54124	0.011046	0.0236363
LGALS14	ENSG00000006659	protein_coding	0.81523	-0.951276	0.283205	-3.35897	0.000782335	0.00230619
COX10	ENSG00000006695	protein_coding	758.716	0.0791037	0.0370533	2.13486	0.0327721	0.0604934
GTF2IRD1	ENSG00000006704	protein_coding	1292.58	-0.0783278	0.0500218	-1.56587	0.117378	0.17808
PAF1	ENSG00000006712	protein_coding	3830.32	-0.0550437	0.033737	-1.63155	0.102774	0.159536
VPS41	ENSG00000006715	protein_coding	4007.8	0.038892	0.0416804	0.933099	0.350769	0.437211
ARHGAP44	ENSG00000006740	protein_coding	830.32	-0.0137113	0.0962939	-0.142391	0.886771	0.912458
ELAC2	ENSG00000006744	protein_coding	3505.88	-0.0337537	0.03519	-0.959183	0.337466	0.424126
SCIN	ENSG00000006747	protein_coding	3831.6	0.542054	0.155424	3.48758	0.000487409	0.00150974
ARSD	ENSG00000006756	protein_coding	5349.48	0.176996	0.049022	3.61053	0.000305568	0.000994698
PNPLA4	ENSG00000006757	protein_coding	1421.41	-0.0962118	0.0599598	-1.6046	0.108581	0.166905
MYH13	ENSG00000006788	protein_coding	28.4772	0.477686	0.261843	1.82432	0.0681039	0.112868
ADIPOR2	ENSG00000006831	protein_coding	5136.87	0.135463	0.0432925	3.12902	0.00175392	0.00470011
CDKL3	ENSG00000006837	protein_coding	76.4834	-0.294855	0.0489031	-6.02937	1.64596e-09	1.81483e-08
UPP2	ENSG00000007001	protein_coding	67.6382	-0.329457	0.125819	-2.6185	0.00883183	0.0194282
PRSS21	ENSG00000007038	protein_coding	13.8305	-0.644303	0.164472	-3.91741	8.95043e-05	0.000331913
MARK4	ENSG00000007047	protein_coding	2209.68	0.0866148	0.0325353	2.66218	0.0077637	0.0173815
PROM1	ENSG00000007062	protein_coding	4357.49	0.827194	0.206037	4.01478	5.9502e-05	0.000230328
CCDC124	ENSG00000007080	protein_coding	2699	-0.220984	0.0550757	-4.01238	6.01106e-05	0.000232428
CEACAM21	ENSG00000007129	protein_coding	132.656	-0.156691	0.0824386	-1.9007	0.0573417	0.0975146
PAFAH1B1	ENSG00000007168	protein_coding	8317.68	0.205857	0.0315046	6.53417	6.39645e-11	9.50117e-10
NOS2	ENSG00000007171	protein_coding	256.499	1.11516	0.10106	11.0347	2.59915e-28	1.13432e-25
DNAH9	ENSG00000007174	protein_coding	109.894	-0.4001	0.13149	-3.04281	0.00234382	0.00606731
KIAA0100	ENSG00000007202	protein_coding	8643.93	0.252736	0.0450321	5.61235	1.99603e-08	1.71961e-07
SLC13A2	ENSG00000007216	protein_coding	53.9344	1.12366	0.215781	5.20742	1.91485e-07	1.31534e-06
GAS7	ENSG00000007237	protein_coding	1075.87	0.073949	0.0830099	0.890845	0.373012	0.45908
TRAPPC6A	ENSG00000007255	protein_coding	1063.49	-0.287736	0.0576744	-4.98897	6.07017e-07	3.72369e-06
MATK	ENSG00000007264	protein_coding	345.122	-0.52477	0.0827624	-6.34068	2.2876e-10	3.00967e-09
CEACAM7	ENSG00000007306	protein_coding	1.63774	-0.80073	0.334306	-2.3952	0.0166113	0.0336946
CD79B	ENSG00000007312	protein_coding	407.008	-0.082963	0.0804462	-1.03128	0.302407	0.387905
SCN4A	ENSG00000007314	protein_coding	427.616	0.770394	0.123124	6.25706	3.92303e-10	4.93193e-09
ST7L	ENSG00000007341	protein_coding	529.148	-0.102779	0.0328592	-3.12787	0.00176076	0.00471485
TKTL1	ENSG00000007350	protein_coding	18.6054	-0.407248	0.122717	-3.31859	0.000904725	0.00262576
PAX6	ENSG00000007372	protein_coding	273.029	-0.0352706	0.0695634	-0.507029	0.612135	0.682574
RPUSD1	ENSG00000007376	protein_coding	980.214	-0.269241	0.050574	-5.3237	1.0168e-07	7.42911e-07
RHBDF1	ENSG00000007384	protein_coding	1406.25	0.103556	0.0586541	1.76553	0.0774744	0.125871
LUC7L	ENSG00000007392	protein_coding	1948.08	-0.251849	0.0763139	-3.30017	0.000966264	0.00278234
CACNA2D2	ENSG00000007402	protein_coding	121.329	0.407711	0.0748358	5.44807	5.09191e-08	3.98313e-07
BAIAP3	ENSG00000007516	protein_coding	533.025	0.124678	0.0836947	1.48967	0.136311	0.201598
TSR3	ENSG00000007520	protein_coding	2358.42	-0.207661	0.0476512	-4.35794	1.31294e-05	5.94155e-05
PIGQ	ENSG00000007541	protein_coding	3225.94	-0.157815	0.0586698	-2.68988	0.00714775	0.0161767
CRAMP1	ENSG00000007545	protein_coding	867.519	0.17213	0.0463753	3.71168	0.000205889	0.000698709
TEAD3	ENSG00000007866	protein_coding	1041.23	0.0464895	0.0521027	0.892267	0.37225	0.458462
SELE	ENSG00000007908	protein_coding	270.586	0.351996	0.120642	2.9177	0.00352626	0.00870294
DNAJC11	ENSG00000007923	protein_coding	1841.51	0.184737	0.0399017	4.62979	3.6603e-06	1.87659e-05
FMO3	ENSG00000007933	protein_coding	911.912	0.0717305	0.117877	0.60852	0.542842	0.619603
MYLIP	ENSG00000007944	protein_coding	3000.89	0.276395	0.0508539	5.43508	5.47716e-08	4.25832e-07
NOX1	ENSG00000007952	protein_coding	44.9244	-0.616974	0.06196	-9.95763	2.33576e-23	4.35096e-21
E2F2	ENSG00000007968	protein_coding	126.063	-0.186982	0.0804091	-2.32538	0.0200517	0.0396363
PSMB1	ENSG00000008018	protein_coding	7303.95	-0.281778	0.0400529	-7.03514	1.99068e-12	4.11646e-11
SYN1	ENSG00000008056	protein_coding	141.915	-0.0977417	0.121163	-0.806694	0.419843	0.504693
JARID2	ENSG00000008083	protein_coding	1197.04	0.201232	0.0370373	5.43322	5.53454e-08	4.29783e-07
CDKL5	ENSG00000008086	protein_coding	1832.63	0.404538	0.0633783	6.3829	1.73763e-10	2.34398e-09
CAMK1G	ENSG00000008118	protein_coding	186.632	0.471875	0.104136	4.53134	5.8611e-06	2.87127e-05
CDK11A	ENSG00000008128	protein_coding	297.814	-0.257763	0.0704065	-3.66106	0.00025117	0.000835421
NADK	ENSG00000008130	protein_coding	2319.89	-0.0225693	0.0324717	-0.695044	0.487028	0.568253
TFAP2B	ENSG00000008196	protein_coding	30.0087	2.45294	0.225225	10.8911	1.27154e-27	5.02303e-25
TFAP2D	ENSG00000008197	protein_coding	1.05316	0.0922042	0.328297	0.280856	0.778821	0.824981
DLEC1	ENSG00000008226	protein_coding	46.3526	0.163292	0.110515	1.47755	0.139528	0.205519
CYTH3	ENSG00000008256	protein_coding	2055.19	0.411935	0.0428245	9.61915	6.63768e-22	9.47554e-20
ADAM22	ENSG00000008277	protein_coding	1243.8	-0.112267	0.0806736	-1.39162	0.164037	0.235121
SYPL1	ENSG00000008282	protein_coding	9004.2	-0.0325168	0.0500961	-0.649088	0.516281	0.595292
CYB561	ENSG00000008283	protein_coding	3582.13	-0.188898	0.0479429	-3.94006	8.14611e-05	0.000305447
SPAG9	ENSG00000008294	protein_coding	9067.96	0.219282	0.048173	4.55197	5.31463e-06	2.63064e-05
CELSR3	ENSG00000008300	protein_coding	160.072	0.135747	0.109012	1.24525	0.21304	0.291291
AASS	ENSG00000008311	protein_coding	575.567	0.383378	0.070112	5.46809	4.54916e-08	3.59973e-07
PLEKHG6	ENSG00000008323	protein_coding	270.358	-0.475188	0.103894	-4.5738	4.78956e-06	2.39368e-05
SS18L2	ENSG00000008324	protein_coding	484.207	-0.363582	0.0488635	-7.44076	1.00104e-13	2.7095e-12
MPND	ENSG00000008382	protein_coding	1246.09	-0.258004	0.0498819	-5.17231	2.31217e-07	1.56066e-06
MGST1	ENSG00000008394	protein_coding	8940.45	-0.811191	0.0983992	-8.24387	1.66721e-16	7.95817e-15
CRY1	ENSG00000008405	protein_coding	1256.86	0.19724	0.0503489	3.91746	8.94884e-05	0.000331904
PGLYRP1	ENSG00000008438	protein_coding	7.52899	-0.326257	0.136373	-2.39239	0.0167391	0.0339178
NFIX	ENSG00000008441	protein_coding	4338.51	0.175578	0.0571516	3.07215	0.0021252	0.00556645
ST3GAL1	ENSG00000008513	protein_coding	4941.31	0.302169	0.0653283	4.62539	3.73899e-06	1.91265e-05
MMP25	ENSG00000008516	protein_coding	162.754	-0.17556	0.0793799	-2.21164	0.0269913	0.0511454
IL32	ENSG00000008517	protein_coding	15743.6	-0.702765	0.0840621	-8.36007	6.26812e-17	3.29393e-15
PKD1	ENSG00000008710	protein_coding	3754.8	0.196146	0.0479103	4.09403	4.23944e-05	0.00016983
MAPK8IP2	ENSG00000008735	protein_coding	122.943	-0.643914	0.139687	-4.6097	4.03247e-06	2.04838e-05
MED24	ENSG00000008838	protein_coding	3598.54	0.0668911	0.030444	2.19718	0.0280073	0.0527889
RHOBTB2	ENSG00000008853	protein_coding	1503.56	0.367941	0.0560514	6.56434	5.22632e-11	7.89357e-10
HEATR5B	ENSG00000008869	protein_coding	2463.25	0.151503	0.039938	3.79345	0.000148568	0.000521047
SEC62	ENSG00000008952	protein_coding	12775.4	-0.0760585	0.0430381	-1.76724	0.0771888	0.125491
RPS20	ENSG00000008988	protein_coding	48152.6	-0.587125	0.0624589	-9.40018	5.44686e-21	6.56834e-19
CSDE1	ENSG00000009307	protein_coding	30913.7	0.148733	0.0350365	4.24509	2.18509e-05	9.39124e-05
UBE3C	ENSG00000009335	protein_coding	4667.04	0.148753	0.0401339	3.70642	0.000210212	0.000711271
REV3L	ENSG00000009413	protein_coding	1677.27	0.165937	0.0574328	2.88924	0.00386176	0.00942034
TENM1	ENSG00000009694	protein_coding	1494.37	-0.23355	0.109036	-2.14195	0.0321973	0.0596076
PAX7	ENSG00000009709	protein_coding	1.13778	-0.81889	0.302628	-2.70593	0.00681138	0.0155209
MASP2	ENSG00000009724	protein_coding	81.5655	0.224194	0.0958329	2.33943	0.0193131	0.0383806
IYD	ENSG00000009765	protein_coding	130.937	0.335553	0.158928	2.11135	0.034742	0.0636299
FAM76A	ENSG00000009780	protein_coding	815.116	0.00755869	0.038426	0.196708	0.844056	0.878846
TRAF3IP3	ENSG00000009790	protein_coding	580.23	-0.281711	0.0889231	-3.16803	0.00153475	0.004178
POMT2	ENSG00000009830	protein_coding	1282.42	0.198161	0.0430326	4.6049	4.1266e-06	2.09248e-05
VTA1	ENSG00000009844	protein_coding	2164.21	0.00568904	0.0386253	0.147288	0.882905	0.909153
MLXIPL	ENSG00000009950	protein_coding	1727.18	-0.54692	0.12682	-4.31256	1.61375e-05	7.15031e-05
BAZ1B	ENSG00000009954	protein_coding	5986.65	0.113234	0.0338668	3.34351	0.000827254	0.00242317
RANBP9	ENSG00000010017	protein_coding	2208.23	0.114341	0.0305881	3.7381	0.000185417	0.000636064
ETV7	ENSG00000010030	protein_coding	570.147	-0.545879	0.0903309	-6.04311	1.51175e-09	1.6806e-08
SPRTN	ENSG00000010072	protein_coding	524.039	0.0602027	0.0344474	1.74767	0.0805215	0.130019
EEF1AKNMT	ENSG00000010165	protein_coding	1587.49	0.134363	0.032572	4.1251	3.7057e-05	0.000150754
DYRK4	ENSG00000010219	protein_coding	943.155	-0.263219	0.0410427	-6.4133	1.424e-10	1.96015e-09
ZNF207	ENSG00000010244	protein_coding	7052.2	-0.109636	0.0247029	-4.43818	9.07226e-06	4.25645e-05
UQCRC1	ENSG00000010256	protein_coding	7388.89	0.0879241	0.065936	1.33348	0.182375	0.25667
STARD3NL	ENSG00000010270	protein_coding	3185.32	-0.170207	0.042315	-4.02239	5.76107e-05	0.000223725
CD9	ENSG00000010278	protein_coding	13013.7	0.264404	0.0828206	3.19249	0.0014105	0.0038808
HHATL	ENSG00000010282	protein_coding	139.45	2.32773	0.318841	7.30062	2.86448e-13	7.09525e-12
NCAPD2	ENSG00000010292	protein_coding	2723.81	0.196612	0.0471351	4.17125	3.02933e-05	0.000125842
IFFO1	ENSG00000010295	protein_coding	1484.01	-0.137508	0.0651648	-2.11016	0.0348447	0.0637823
GIPR	ENSG00000010310	protein_coding	71.8518	-0.357262	0.132602	-2.69425	0.00705463	0.0159988
PHF7	ENSG00000010318	protein_coding	220.032	0.10037	0.0615064	1.63186	0.102708	0.159472
SEMA3G	ENSG00000010319	protein_coding	1677.96	0.698139	0.103144	6.76861	1.30022e-11	2.22901e-10
NISCH	ENSG00000010322	protein_coding	3810.27	0.301788	0.042679	7.0711	1.53705e-12	3.2821e-11
STAB1	ENSG00000010327	protein_coding	8872.55	0.178084	0.0732818	2.43012	0.0150937	0.0310215
FUZ	ENSG00000010361	protein_coding	1483.33	-0.178232	0.0494729	-3.60262	0.000315026	0.00102229
SLC6A13	ENSG00000010379	protein_coding	9619.05	-0.10163	0.138816	-0.732121	0.464095	0.546954
IDS	ENSG00000010404	protein_coding	9770.15	0.02359	0.0425718	0.554122	0.579495	0.652981
PRSS3	ENSG00000010438	protein_coding	16.3266	-0.509591	0.201583	-2.52794	0.0114733	0.0244377
ZNF200	ENSG00000010539	protein_coding	530.152	0.0225084	0.0248247	0.906696	0.364568	0.450538
CD4	ENSG00000010610	protein_coding	6013.69	-0.109283	0.0717458	-1.5232	0.127709	0.190804
LRRC23	ENSG00000010626	protein_coding	1175.48	-0.321392	0.0510269	-6.29848	3.00584e-10	3.85178e-09
BTK	ENSG00000010671	protein_coding	648.183	-0.230092	0.0717623	-3.2063	0.00134453	0.00372096
HFE	ENSG00000010704	protein_coding	1485.91	-0.0477145	0.0442088	-1.0793	0.280455	0.36478
SCMH1	ENSG00000010803	protein_coding	3605.76	-0.0893924	0.0375322	-2.38175	0.0172306	0.0347753
FYN	ENSG00000010810	protein_coding	4167.95	0.212028	0.057557	3.68378	0.000229798	0.0007719
HIVEP2	ENSG00000010818	protein_coding	3083.65	0.230579	0.0462989	4.98023	6.35083e-07	3.87665e-06
FMO1	ENSG00000010932	protein_coding	3634.63	-0.160932	0.133828	-1.20253	0.229156	0.309185
ELOA	ENSG00000011007	protein_coding	2437.5	0.119966	0.0262214	4.57512	4.75936e-06	2.38119e-05
LYPLA2	ENSG00000011009	protein_coding	3034.26	-0.131746	0.0462605	-2.84791	0.00440071	0.0105613
CLCN6	ENSG00000011021	protein_coding	1576.26	0.29031	0.0457859	6.3406	2.28876e-10	3.01034e-09
MRC2	ENSG00000011028	protein_coding	3503.69	0.546895	0.099672	5.48695	4.08937e-08	3.27492e-07
NME1-NME2	ENSG00000011052	protein_coding	29.4446	-0.348068	0.0783842	-4.44055	8.97309e-06	4.2138e-05
SLC6A7	ENSG00000011083	protein_coding	5.336	-0.0120712	0.149105	-0.0809579	0.935475	0.950915
TSPAN9	ENSG00000011105	protein_coding	11202.7	0.0135272	0.0494495	0.273556	0.784426	0.829577
BTBD7	ENSG00000011114	protein_coding	2962.27	0.27343	0.0413362	6.61479	3.72089e-11	5.79559e-10
APBA3	ENSG00000011132	protein_coding	1010.35	-0.188172	0.0401424	-4.68761	2.76421e-06	1.46081e-05
MKS1	ENSG00000011143	protein_coding	815.927	-0.0352499	0.0361147	-0.976054	0.329038	0.415504
ABHD5	ENSG00000011198	protein_coding	566.933	0.159965	0.0454838	3.51697	0.000436508	0.0013691
ANOS1	ENSG00000011201	protein_coding	577.063	0.31124	0.083613	3.72238	0.00019735	0.000672219
AKAP8L	ENSG00000011243	protein_coding	2099.36	-0.0739561	0.0507099	-1.45842	0.144726	0.21193
MBTD1	ENSG00000011258	protein_coding	1302.97	0.171802	0.0421228	4.0786	4.53076e-05	0.00018038
UTP18	ENSG00000011260	protein_coding	1545.8	-0.00282791	0.0353091	-0.0800901	0.936166	0.951321
RNF216	ENSG00000011275	protein_coding	3053.11	0.0609075	0.0277715	2.19317	0.0282954	0.0532861
TTC19	ENSG00000011295	protein_coding	2728.92	0.075157	0.0318244	2.36162	0.0181954	0.0364353
PTBP1	ENSG00000011304	protein_coding	12339.2	0.0090813	0.0266818	0.340356	0.733589	0.787573
DPF1	ENSG00000011332	protein_coding	16.1465	0.0503472	0.109529	0.459671	0.645752	0.712091
SYT7	ENSG00000011347	protein_coding	134.6	0.463554	0.14379	3.22383	0.0012649	0.00352463
LARS2	ENSG00000011376	protein_coding	1006.91	0.5319	0.063628	8.35952	6.29715e-17	3.30259e-15
PIK3C2A	ENSG00000011405	protein_coding	5109.1	0.20194	0.0536202	3.76611	0.000165808	0.000575169
PLAUR	ENSG00000011422	protein_coding	1403.26	-0.145558	0.0992665	-1.46633	0.142558	0.209277
ANLN	ENSG00000011426	protein_coding	724.854	0.0306409	0.108876	0.28143	0.778381	0.824638
WIZ	ENSG00000011451	protein_coding	2785.35	0.109757	0.0355868	3.08421	0.00204096	0.0053713
RABGAP1	ENSG00000011454	protein_coding	3485.58	0.326159	0.0345669	9.43559	3.88793e-21	4.84131e-19
DCN	ENSG00000011465	protein_coding	4767.41	0.54769	0.173358	3.15931	0.00158145	0.00429295
QPCTL	ENSG00000011478	protein_coding	702.884	-0.223002	0.0593574	-3.75694	0.000172006	0.000594555
PPP5C	ENSG00000011485	protein_coding	2962.48	0.0271059	0.0290468	0.93318	0.350727	0.437171
CEP68	ENSG00000011523	protein_coding	2377.56	0.42762	0.0461445	9.26698	1.91486e-20	2.11438e-18
MAP4K3	ENSG00000011566	protein_coding	1965.81	0.163765	0.0493124	3.32097	0.000897044	0.00260594
ZBTB32	ENSG00000011590	protein_coding	41.5827	-0.276547	0.095345	-2.90049	0.00372577	0.00912505
TYROBP	ENSG00000011600	protein_coding	5055.62	-0.560611	0.0790485	-7.09199	1.32196e-12	2.86283e-11
TMEM159	ENSG00000011638	protein_coding	3142.53	-0.188062	0.0562018	-3.34619	0.0008193	0.00240264
GABRA3	ENSG00000011677	protein_coding	6.5335	0.992759	0.195382	5.08112	3.75221e-07	2.41966e-06
BRCA1	ENSG00000012048	protein_coding	429.178	0.177633	0.0572576	3.10235	0.0019199	0.00508804
ERCC1	ENSG00000012061	protein_coding	2948.88	-0.22456	0.0380413	-5.90305	3.56835e-09	3.63618e-08
CD22	ENSG00000012124	protein_coding	287.396	-0.00998127	0.107169	-0.0931358	0.925796	0.942958
SEMA3B	ENSG00000012171	protein_coding	1583.14	-0.285093	0.120423	-2.36743	0.0179122	0.0359468
MBTPS2	ENSG00000012174	protein_coding	1911.7	0.0290028	0.05224	0.555184	0.578769	0.652339
PRICKLE3	ENSG00000012211	protein_coding	451.34	-0.102716	0.047689	-2.15388	0.0312497	0.0580856
LTF	ENSG00000012223	protein_coding	2499.58	-0.732939	0.197334	-3.7142	0.000203849	0.000692402
EXTL3	ENSG00000012232	protein_coding	2894.05	0.311113	0.0426425	7.29584	2.96801e-13	7.32004e-12
NR1H4	ENSG00000012504	protein_coding	2652.01	-0.475233	0.0902009	-5.26861	1.37462e-07	9.74029e-07
ELOVL5	ENSG00000012660	protein_coding	5242.81	-0.0826822	0.0446653	-1.85115	0.0641481	0.107403
ALOX5	ENSG00000012779	protein_coding	2677.52	-0.340268	0.100614	-3.3819	0.000719853	0.00214059
KDM5D	ENSG00000012817	protein_coding	1268.18	-0.200018	0.235935	-0.847768	0.396567	0.482229
CALCOCO1	ENSG00000012822	protein_coding	5899.26	0.194629	0.0347831	5.5955	2.19988e-08	1.87584e-07
UBR7	ENSG00000012963	protein_coding	2990.19	0.0650982	0.0355804	1.82961	0.0673089	0.111785
MAP4K5	ENSG00000012983	protein_coding	2282.06	0.236542	0.042498	5.56595	2.60728e-08	2.18421e-07
EHD3	ENSG00000013016	protein_coding	1961.77	0.370348	0.0674267	5.49261	3.96047e-08	3.18338e-07
PSMC4	ENSG00000013275	protein_coding	4008.88	-0.291213	0.038647	-7.53521	4.87566e-14	1.39901e-12
MAN2B2	ENSG00000013288	protein_coding	3762.24	0.103787	0.0391635	2.6501	0.00804681	0.0179321
SLC7A14	ENSG00000013293	protein_coding	3.694	0.453272	0.194631	2.32887	0.0198658	0.0393316
CLDN11	ENSG00000013297	protein_coding	138.993	0.314917	0.124972	2.51991	0.0117386	0.0249216
SLC25A39	ENSG00000013306	protein_coding	6612.21	-0.29286	0.0704053	-4.15963	3.18765e-05	0.00013175
MVP	ENSG00000013364	protein_coding	20266.7	-0.178928	0.049103	-3.64393	0.000268506	0.000886586
NUB1	ENSG00000013374	protein_coding	4820.83	-0.0974231	0.0337563	-2.88607	0.00390086	0.00950004
PGM3	ENSG00000013375	protein_coding	2260.59	-0.121115	0.0379606	-3.19055	0.00142001	0.00390439
RWDD2A	ENSG00000013392	protein_coding	622.755	-0.139025	0.0400243	-3.47352	0.000513686	0.00158183
CLK1	ENSG00000013441	protein_coding	5479.37	-0.150801	0.0710551	-2.12231	0.033812	0.0621526
POLR3B	ENSG00000013503	protein_coding	550.618	0.196469	0.0485393	4.04762	5.17402e-05	0.000203375
ANGEL1	ENSG00000013523	protein_coding	1444.74	0.323959	0.0435348	7.44138	9.96412e-14	2.70175e-12
RNF14	ENSG00000013561	protein_coding	4619.84	-0.217911	0.0485809	-4.48553	7.27317e-06	3.4932e-05
DNASE1L1	ENSG00000013563	protein_coding	1662.68	-0.00550844	0.0359471	-0.153237	0.878211	0.90548
DDX11	ENSG00000013573	protein_coding	1040.03	-0.272867	0.0741075	-3.68204	0.000231372	0.000776845
HEBP1	ENSG00000013583	protein_coding	2748.32	-0.116562	0.043353	-2.68868	0.00717362	0.0162269
GPRC5A	ENSG00000013588	protein_coding	1141.06	0.41808	0.174301	2.39861	0.0164575	0.0334107
MAMLD1	ENSG00000013619	protein_coding	417.459	0.304695	0.060785	5.01267	5.36786e-07	3.33619e-06
CD6	ENSG00000013725	protein_coding	668.794	-0.26622	0.0902462	-2.94994	0.0031784	0.00794021
TACC3	ENSG00000013810	protein_coding	1078.86	-0.116351	0.0675142	-1.72335	0.0848256	0.135968
UFL1	ENSG00000014123	protein_coding	3184.71	-0.0165645	0.044453	-0.37263	0.709424	0.766604
POLA2	ENSG00000014138	protein_coding	695.997	-0.0596597	0.0386635	-1.54305	0.122819	0.184791
ZC3H3	ENSG00000014164	protein_coding	1414.35	-0.355143	0.0505343	-7.02777	2.09857e-12	4.32007e-11
CAPN1	ENSG00000014216	protein_coding	9167.02	0.00961714	0.0399872	0.240505	0.809939	0.850902
ACP3	ENSG00000014257	protein_coding	65.0306	0.46533	0.118896	3.91374	9.08761e-05	0.000336428
MDH1	ENSG00000014641	protein_coding	7539.84	-0.209183	0.0509837	-4.10293	4.07947e-05	0.000164124
SLC30A9	ENSG00000014824	protein_coding	4982.91	0.0406964	0.0560767	0.725728	0.468006	0.550685
MTMR11	ENSG00000014914	protein_coding	3337.94	-0.0603989	0.0786788	-0.767664	0.442687	0.526614
COX15	ENSG00000014919	protein_coding	3181.23	-0.00452883	0.0358615	-0.126287	0.899505	0.922663
CCDC88C	ENSG00000015133	protein_coding	1308.76	0.0581776	0.0644244	0.903036	0.366507	0.452324
YAF2	ENSG00000015153	protein_coding	1241.29	-0.285575	0.0573719	-4.97761	6.43751e-07	3.92538e-06
ZMYND11	ENSG00000015171	protein_coding	5002.51	0.19561	0.0381777	5.12367	2.99638e-07	1.97506e-06
WAS	ENSG00000015285	protein_coding	1094.88	-0.39581	0.0784792	-5.0435	4.57087e-07	2.89104e-06
DPEP1	ENSG00000015413	protein_coding	675.582	-0.0618173	0.182317	-0.339064	0.734561	0.788395
BID	ENSG00000015475	protein_coding	1516.37	-0.356229	0.0433773	-8.21235	2.16902e-16	1.00907e-14
MATR3	ENSG00000015479	protein_coding	472.355	-0.298483	0.0781895	-3.81743	0.00013485	0.000477763
NPC1L1	ENSG00000015520	protein_coding	133.528	-0.324452	0.208317	-1.55749	0.119353	0.180515
XYLT2	ENSG00000015532	protein_coding	2676.26	-0.0807162	0.044243	-1.82438	0.0680944	0.112856
RGPD5	ENSG00000015568	protein_coding	1.00221	-0.017681	0.151921	-0.116383	0.907349	0.928695
STMN4	ENSG00000015592	protein_coding	3.94708	-0.283576	0.133876	-2.1182	0.0341577	0.0627126
NUDCD3	ENSG00000015676	protein_coding	6696.62	-0.0691597	0.0297665	-2.32341	0.0201572	0.0398295
ISL1	ENSG00000016082	protein_coding	1.07658	-0.0657585	0.297332	-0.221162	0.824967	0.863226
CHDH	ENSG00000016391	protein_coding	2984.38	0.0721079	0.0881779	0.817755	0.413497	0.49849
IL20RA	ENSG00000016402	protein_coding	25.7818	-0.327665	0.210856	-1.55397	0.120191	0.181503
CLCA1	ENSG00000016490	protein_coding	0.665925	-0.553523	0.34482	-1.60526	0.108438	0.166718
CLCA4	ENSG00000016602	protein_coding	1.16442	-0.707245	0.193232	-3.66008	0.000252133	0.00083826
GLT8D1	ENSG00000016864	protein_coding	2071.87	0.0865867	0.0347059	2.49487	0.0126002	0.0264931
ATP2C1	ENSG00000017260	protein_coding	6907.54	0.138909	0.041927	3.31311	0.000922643	0.00267275
IGF1	ENSG00000017427	protein_coding	107.368	-0.0705849	0.121954	-0.578783	0.562735	0.637922
SLC38A5	ENSG00000017483	protein_coding	788.453	-0.252793	0.189252	-1.33575	0.181631	0.255858
RALBP1	ENSG00000017797	protein_coding	4027.05	0.292094	0.0372048	7.85099	4.1275e-15	1.50093e-13
RUFY3	ENSG00000018189	protein_coding	2895.22	-0.388156	0.0652086	-5.95253	2.64028e-09	2.77305e-08
CNTN1	ENSG00000018236	protein_coding	178.875	0.955279	0.205084	4.65798	3.19322e-06	1.6634e-05
SLC11A1	ENSG00000018280	protein_coding	792.988	-0.469873	0.0997579	-4.71013	2.47554e-06	1.32275e-05
WWTR1	ENSG00000018408	protein_coding	14245.8	0.087003	0.054079	1.60881	0.107657	0.165763
AGPS	ENSG00000018510	protein_coding	4598.18	-0.0241094	0.0497365	-0.484742	0.62786	0.696483
CXorf56	ENSG00000018610	protein_coding	1095.77	0.151361	0.030331	4.99032	6.028e-07	3.70079e-06
ATP1A2	ENSG00000018625	protein_coding	421.553	0.45344	0.119856	3.78322	0.000154814	0.00054073
TTC27	ENSG00000018699	protein_coding	1181.89	-0.0276121	0.0322705	-0.855647	0.392193	0.477962
ZNF582	ENSG00000018869	protein_coding	136.119	0.393045	0.0662055	5.93675	2.90723e-09	3.02706e-08
VSIG2	ENSG00000019102	protein_coding	143.48	0.687098	0.133294	5.15475	2.53965e-07	1.69943e-06
PHLDB1	ENSG00000019144	protein_coding	5253.29	0.274006	0.051929	5.27655	1.31636e-07	9.36515e-07
MARCO	ENSG00000019169	protein_coding	313.773	-0.722639	0.164645	-4.38908	1.1383e-05	5.22135e-05
CYP24A1	ENSG00000019186	protein_coding	561.592	-0.439379	0.224096	-1.96068	0.0499168	0.0866598
PRDM11	ENSG00000019485	protein_coding	773.589	0.365438	0.042278	8.64368	5.44301e-18	3.54291e-16
SYT13	ENSG00000019505	protein_coding	4791.83	-0.38756	0.16156	-2.39886	0.0164464	0.0333927
SNAI2	ENSG00000019549	protein_coding	722.693	0.291963	0.0893251	3.26854	0.00108103	0.00307073
CD74	ENSG00000019582	protein_coding	257857	-0.460655	0.077063	-5.97764	2.26395e-09	2.41601e-08
HGF	ENSG00000019991	protein_coding	1352.62	0.0952907	0.124852	0.763227	0.445328	0.529072
ZRANB1	ENSG00000019995	protein_coding	925.108	0.462177	0.0444216	10.4043	2.36924e-25	5.93268e-23
NCDN	ENSG00000020129	protein_coding	1696.47	0.041798	0.0416143	1.00442	0.315178	0.401209
ADGRA2	ENSG00000020181	protein_coding	4226.82	0.505508	0.0788736	6.40909	1.46388e-10	2.00721e-09
ZFP64	ENSG00000020256	protein_coding	912.901	0.131573	0.0368914	3.5665	0.000361778	0.00115718
MNAT1	ENSG00000020426	protein_coding	646.091	0.0597868	0.0433872	1.37798	0.168208	0.240094
SAMD4A	ENSG00000020577	protein_coding	2033.12	0.167078	0.0614228	2.72013	0.00652555	0.0149409
RUNX3	ENSG00000020633	protein_coding	1511.2	-0.265409	0.0858645	-3.09102	0.00199468	0.00526311
MRE11	ENSG00000020922	protein_coding	1370.24	0.0505562	0.0325214	1.55455	0.120053	0.181346
PLEKHB1	ENSG00000021300	protein_coding	380.628	0.026442	0.127268	0.207767	0.835411	0.871727
SERPINB1	ENSG00000021355	protein_coding	5481.98	-0.217162	0.0390849	-5.55617	2.75758e-08	2.29543e-07
CYP3A43	ENSG00000021461	protein_coding	10.452	-0.462365	0.131825	-3.50741	0.000452491	0.00141323
SLC7A9	ENSG00000021488	protein_coding	972.091	-0.406356	0.121545	-3.34327	0.000827982	0.00242484
SPAST	ENSG00000021574	protein_coding	1155.27	-0.0703077	0.0422582	-1.66376	0.0961599	0.150957
NRXN3	ENSG00000021645	protein_coding	749.388	-0.00394388	0.119188	-0.0330895	0.973603	0.98045
OSBPL5	ENSG00000021762	protein_coding	1625.64	0.122492	0.0519868	2.35621	0.0184626	0.0368994
AQR	ENSG00000021776	protein_coding	3129.37	0.140009	0.0347034	4.03444	5.47332e-05	0.000213855
CPS1	ENSG00000021826	protein_coding	303.341	0.84922	0.138832	6.11687	9.54286e-10	1.10427e-08
C8B	ENSG00000021852	protein_coding	1.3983	-0.885549	0.310382	-2.85309	0.00432962	0.0104114
FHL1	ENSG00000022267	protein_coding	19994.8	-0.717725	0.110744	-6.48097	9.11354e-11	1.30669e-09
RTF2	ENSG00000022277	protein_coding	5927.86	-0.0816949	0.0258909	-3.15535	0.00160307	0.00434231
GABRA1	ENSG00000022355	protein_coding	0.841982	0.619342	0.277441	2.23233	0.0255929	0.0488633
NLRP2	ENSG00000022556	protein_coding	145.035	0.162824	0.158865	1.02492	0.3054	0.39088
SLC45A4	ENSG00000022567	protein_coding	2186.97	0.382374	0.0616956	6.19776	5.72715e-10	6.97055e-09
RNF10	ENSG00000022840	protein_coding	8934.84	-0.0865699	0.0300009	-2.88558	0.00390696	0.00951239
ZNF839	ENSG00000022976	protein_coding	364.656	0.256113	0.0472522	5.42012	5.95575e-08	4.59223e-07
ZDHHC6	ENSG00000023041	protein_coding	2437.4	0.00415042	0.0288196	0.144014	0.885489	0.911426
GRAMD1B	ENSG00000023171	protein_coding	774.667	-0.195655	0.0951529	-2.05621	0.039762	0.0712994
RNH1	ENSG00000023191	protein_coding	8290.13	-0.0477077	0.0365778	-1.30428	0.192139	0.267746
NDUFS1	ENSG00000023228	protein_coding	6322.2	0.143894	0.0549733	2.61752	0.00885709	0.0194754
RB1CC1	ENSG00000023287	protein_coding	3452.58	0.0042417	0.0434982	0.0975144	0.922318	0.940105
ERP44	ENSG00000023318	protein_coding	4381.68	-0.14193	0.0346944	-4.09085	4.29787e-05	0.000171895
ALAS1	ENSG00000023330	protein_coding	2073.29	0.25792	0.0629285	4.09862	4.15618e-05	0.000166844
BIRC3	ENSG00000023445	protein_coding	10984.1	-0.524738	0.0979033	-5.35976	8.33339e-08	6.22545e-07
AKAP11	ENSG00000023516	protein_coding	4326.29	0.190402	0.0510297	3.73121	0.000190565	0.000651384
GLRX2	ENSG00000023572	protein_coding	301.468	-0.509026	0.0512869	-9.92506	3.23895e-23	5.84337e-21
SNAPC1	ENSG00000023608	protein_coding	682.358	0.00966473	0.0492721	0.19615	0.844493	0.879121
DERA	ENSG00000023697	protein_coding	3931.88	-0.505526	0.0558386	-9.05334	1.38667e-19	1.25578e-17
STRAP	ENSG00000023734	protein_coding	5675.1	0.0592117	0.0447426	1.32339	0.185707	0.260454
ABCC2	ENSG00000023839	protein_coding	2152.25	-0.63836	0.120026	-5.31853	1.04612e-07	7.62362e-07
DEF6	ENSG00000023892	protein_coding	836.095	-0.426907	0.0798639	-5.34543	9.02041e-08	6.68637e-07
PLEKHO1	ENSG00000023902	protein_coding	3140.71	-0.286148	0.0702662	-4.07234	4.65425e-05	0.000184783
GCLM	ENSG00000023909	protein_coding	1979.17	-0.113622	0.0595846	-1.90691	0.0565327	0.0963783
UBR2	ENSG00000024048	protein_coding	3648.32	0.114257	0.034891	3.27467	0.00105785	0.00301162
EHD2	ENSG00000024422	protein_coding	20326.5	-0.0131985	0.0717267	-0.184011	0.854005	0.886988
DEPDC1	ENSG00000024526	protein_coding	164.073	0.0931308	0.103231	0.902161	0.366971	0.4528
CCDC28A	ENSG00000024862	protein_coding	1912.07	-0.0860488	0.0415146	-2.07274	0.0381969	0.0689271
RRAGD	ENSG00000025039	protein_coding	4286.83	0.0997483	0.0867074	1.1504	0.249979	0.332213
HSF2	ENSG00000025156	protein_coding	552.154	0.0491554	0.0360431	1.36379	0.172633	0.245379
PHF20	ENSG00000025293	protein_coding	2560.33	0.0520995	0.0325687	1.59968	0.10967	0.168331
HSD17B6	ENSG00000025423	protein_coding	55.5606	0.521047	0.129624	4.01969	5.82753e-05	0.000226057
NR1H3	ENSG00000025434	protein_coding	2280.58	-0.355243	0.0508245	-6.98959	2.75685e-12	5.49977e-11
TYMP	ENSG00000025708	protein_coding	6356.29	-0.507466	0.0810839	-6.25853	3.88618e-10	4.89232e-09
NCAPH2	ENSG00000025770	protein_coding	2442.65	-0.116721	0.0438557	-2.66148	0.00777984	0.0174116
TOMM34	ENSG00000025772	protein_coding	1890.69	0.0366642	0.0437629	0.837793	0.402147	0.487551
SEC63	ENSG00000025796	protein_coding	5465.63	0.0635684	0.036708	1.73173	0.0833214	0.133866
KPNA6	ENSG00000025800	protein_coding	4419.73	0.187031	0.0293924	6.36325	1.97534e-10	2.6367e-09
VIM	ENSG00000026025	protein_coding	182561	-0.255819	0.0634898	-4.02929	5.59455e-05	0.000218053
RTEL1-TNFRSF6B	ENSG00000026036	protein_coding	216.287	-0.42898	0.102183	-4.19815	2.691e-05	0.000113214
FAS	ENSG00000026103	protein_coding	2101.82	-0.136286	0.0569266	-2.39406	0.0166631	0.0337788
RNASET2	ENSG00000026297	protein_coding	15011.9	-0.811993	0.106968	-7.59098	3.17505e-14	9.50937e-13
CD44	ENSG00000026508	protein_coding	11214.8	-0.166036	0.100261	-1.65603	0.097716	0.152954
KCNG1	ENSG00000026559	protein_coding	47.4418	-0.0364357	0.173949	-0.209463	0.834087	0.870549
AGPAT4	ENSG00000026652	protein_coding	677.559	0.297322	0.0557132	5.33666	9.46767e-08	6.97951e-07
SLAMF7	ENSG00000026751	protein_coding	1282.35	-0.609153	0.114272	-5.33074	9.78154e-08	7.18546e-07
BTN3A1	ENSG00000026950	protein_coding	4874.12	-0.148203	0.0640443	-2.31406	0.0206643	0.0406892
MIPEP	ENSG00000027001	protein_coding	1371.78	-0.0238447	0.0539806	-0.441727	0.658687	0.723499
PRKCH	ENSG00000027075	protein_coding	2995.18	0.293711	0.0597879	4.91255	8.99006e-07	5.30193e-06
INSRR	ENSG00000027644	protein_coding	21.325	0.47497	0.190274	2.49624	0.0125518	0.0264047
IFNGR1	ENSG00000027697	protein_coding	6032.86	-0.181666	0.0431262	-4.21243	2.52637e-05	0.000107015
B4GALT7	ENSG00000027847	protein_coding	2149.07	-0.423558	0.0623253	-6.79592	1.07621e-11	1.88733e-10
SH2D2A	ENSG00000027869	protein_coding	373.143	-0.586327	0.10748	-5.45523	4.89089e-08	3.84557e-07
VRK2	ENSG00000028116	protein_coding	830.778	-0.116506	0.0411815	-2.82908	0.00466814	0.0111314
TNFRSF1B	ENSG00000028137	protein_coding	4751.57	0.00933454	0.0614314	0.151951	0.879226	0.906241
VEZT	ENSG00000028203	protein_coding	3515.99	-0.0646547	0.0338315	-1.91108	0.0559945	0.0956088
POU2F2	ENSG00000028277	protein_coding	722.76	-0.508415	0.0886948	-5.73218	9.91463e-09	9.10842e-08
BRD9	ENSG00000028310	protein_coding	1838.84	-0.118763	0.0348054	-3.41219	0.000644428	0.00193781
SNX1	ENSG00000028528	protein_coding	6713.95	0.154869	0.0204861	7.55971	4.03983e-14	1.18062e-12
TBPL1	ENSG00000028839	protein_coding	618.806	-0.0292425	0.0420168	-0.695971	0.486447	0.567763
ARNTL2	ENSG00000029153	protein_coding	449.496	0.114349	0.0863991	1.32349	0.185672	0.260421
BCLAF1	ENSG00000029363	protein_coding	5686.76	0.102389	0.033434	3.06241	0.00219562	0.00572439
SLC39A9	ENSG00000029364	protein_coding	5425.8	0.1356	0.0418167	3.24273	0.00118389	0.00332397
ANK1	ENSG00000029534	protein_coding	707.055	0.335119	0.135372	2.47553	0.0133037	0.0277748
IBSP	ENSG00000029559	protein_coding	67.5163	-0.235362	0.211194	-1.11443	0.265094	0.348378
TFB1M	ENSG00000029639	protein_coding	460.582	-0.186899	0.0356302	-5.24554	1.55827e-07	1.08967e-06
RABEP1	ENSG00000029725	protein_coding	3307.85	0.170082	0.0323312	5.26062	1.43568e-07	1.01151e-06
HMGB3	ENSG00000029993	protein_coding	854.83	0.221621	0.0904834	2.4493	0.0143134	0.0296036
NUP160	ENSG00000030066	protein_coding	3377.73	0.189577	0.0386887	4.90007	9.58049e-07	5.61617e-06
BAK1	ENSG00000030110	protein_coding	1231.97	-0.301799	0.0476354	-6.33561	2.3641e-10	3.09867e-09
MUSK	ENSG00000030304	protein_coding	3.31417	-0.553981	0.174376	-3.17694	0.00148837	0.00406808
IKZF2	ENSG00000030419	protein_coding	620.162	-0.108224	0.0760023	-1.42395	0.15446	0.223753
GRN	ENSG00000030582	protein_coding	21818.7	0.0509089	0.054546	0.933319	0.350655	0.437117
FAM13B	ENSG00000031003	protein_coding	2150.41	0.197352	0.0467428	4.22208	2.42059e-05	0.00010301
ARHGAP31	ENSG00000031081	protein_coding	3901.27	0.444031	0.0544352	8.15704	3.43325e-16	1.53788e-14
CENPQ	ENSG00000031691	protein_coding	267.241	0.103929	0.0540009	1.92457	0.0542829	0.0931459
SARS1	ENSG00000031698	protein_coding	7972.06	0.0117435	0.032958	0.356317	0.721603	0.777134
RANBP3	ENSG00000031823	protein_coding	2766.35	-0.0435659	0.0279827	-1.55689	0.119497	0.180667
ARID4A	ENSG00000032219	protein_coding	1774.21	0.287475	0.0457589	6.2824	3.33394e-10	4.23903e-09
EIPR1	ENSG00000032389	protein_coding	1290.8	-0.255082	0.0420065	-6.07245	1.25971e-09	1.4239e-08
PNPLA6	ENSG00000032444	protein_coding	3356.54	0.0915487	0.038653	2.36847	0.0178617	0.0358595
IFT88	ENSG00000032742	protein_coding	1413.75	-0.0689945	0.0465016	-1.4837	0.137888	0.203511
ALG1	ENSG00000033011	protein_coding	1166.65	-0.146863	0.0418374	-3.51033	0.000447552	0.00139952
ZCCHC8	ENSG00000033030	protein_coding	1762.75	-0.0790389	0.0290877	-2.71726	0.00658242	0.0150553
ABCF2	ENSG00000033050	protein_coding	2952.17	-0.0397376	0.0380105	-1.04544	0.29582	0.381066
CHPF2	ENSG00000033100	protein_coding	3524.59	-0.0479817	0.0436282	-1.09979	0.271425	0.355153
LRRC7	ENSG00000033122	protein_coding	203.392	-0.614099	0.118118	-5.19901	2.0035e-07	1.37007e-06
FUT8	ENSG00000033170	protein_coding	1421.43	-0.0748237	0.0633659	-1.18082	0.237675	0.318708
UBA6	ENSG00000033178	protein_coding	2667.64	-0.195062	0.049532	-3.9381	8.21303e-05	0.000307579
GAB2	ENSG00000033327	protein_coding	2393.18	0.307317	0.0518401	5.92818	3.06306e-09	3.1691e-08
ATP6V0A1	ENSG00000033627	protein_coding	5950.89	-0.0156457	0.0479019	-0.326621	0.743955	0.796258
PIAS1	ENSG00000033800	protein_coding	2553.92	0.165848	0.0377225	4.39654	1.09989e-05	5.05744e-05
SLC4A7	ENSG00000033867	protein_coding	2553.25	-0.412873	0.0887033	-4.65454	3.24712e-06	1.68818e-05
APBA2	ENSG00000034053	protein_coding	220.849	-0.330728	0.123886	-2.66962	0.00759382	0.0170545
MAP2K3	ENSG00000034152	protein_coding	3377.66	0.0672546	0.0565106	1.19012	0.233998	0.314579
EFCAB1	ENSG00000034239	protein_coding	10.6119	0.445695	0.108527	4.10676	4.0124e-05	0.000161724
TMSB10	ENSG00000034510	protein_coding	74960.5	-0.608514	0.0711179	-8.55641	1.16434e-17	7.08055e-16
ASTE1	ENSG00000034533	protein_coding	475.991	0.0581631	0.0276086	2.1067	0.0351433	0.0642339
RNF19A	ENSG00000034677	protein_coding	5065.49	-0.152725	0.04441	-3.43898	0.000583901	0.00177526
PEX3	ENSG00000034693	protein_coding	967.666	-0.0800237	0.0524584	-1.52547	0.127142	0.190099
GABARAPL2	ENSG00000034713	protein_coding	4712.73	-0.0183856	0.0380166	-0.483619	0.628656	0.697131
MYOC	ENSG00000034971	protein_coding	133.685	-0.943804	0.140229	-6.73045	1.69138e-11	2.82764e-10
SH3YL1	ENSG00000035115	protein_coding	3755.2	-0.133086	0.066296	-2.00744	0.0447023	0.0788984
FAM136A	ENSG00000035141	protein_coding	1839.32	-0.267141	0.0351737	-7.59492	3.07982e-14	9.2302e-13
VCL	ENSG00000035403	protein_coding	9247.99	0.391479	0.050978	7.67937	1.59873e-14	5.08399e-13
DEPDC1B	ENSG00000035499	protein_coding	119.363	-0.148784	0.0936149	-1.58931	0.111989	0.171409
DAPK2	ENSG00000035664	protein_coding	463.186	0.401147	0.113604	3.53109	0.000413849	0.00130545
NSMAF	ENSG00000035681	protein_coding	1831.99	-0.103925	0.03527	-2.94656	0.00321328	0.00801596
ADSS2	ENSG00000035687	protein_coding	2421.88	0.0981351	0.0391983	2.50355	0.0122953	0.0259199
STAP1	ENSG00000035720	protein_coding	93.574	0.520641	0.179656	2.89799	0.00375563	0.00919081
TIMP2	ENSG00000035862	protein_coding	16386.1	0.473487	0.0660427	7.16941	7.53206e-13	1.72058e-11
RFC1	ENSG00000035928	protein_coding	3462.9	0.219765	0.0388097	5.66262	1.49081e-08	1.32086e-07
TBC1D23	ENSG00000036054	protein_coding	2132.03	-0.0109224	0.0435521	-0.250788	0.801978	0.844339
CUL3	ENSG00000036257	protein_coding	3424.72	0.138971	0.0376103	3.69503	0.000219864	0.000741302
MYOM2	ENSG00000036448	protein_coding	501.503	-0.0233826	0.0789479	-0.296177	0.767095	0.815524
OTC	ENSG00000036473	protein_coding	3.84323	0.0914462	0.234151	0.390543	0.696135	0.755505
CYP46A1	ENSG00000036530	protein_coding	149.977	0.07442	0.087034	0.855068	0.392514	0.478302
ZZZ3	ENSG00000036549	protein_coding	2246.14	0.0454727	0.0347664	1.30795	0.19089	0.266412
SLC18A1	ENSG00000036565	protein_coding	6.57702	-0.324664	0.127145	-2.5535	0.0106646	0.0229512
USP2	ENSG00000036672	protein_coding	1549.39	0.212851	0.122586	1.73633	0.0825049	0.132777
CASR	ENSG00000036828	protein_coding	152.785	1.39237	0.197854	7.03735	1.95925e-12	4.06064e-11
TUBG2	ENSG00000037042	protein_coding	1188.75	-0.130394	0.0501364	-2.60079	0.00930088	0.0203292
RPL26L1	ENSG00000037241	protein_coding	971.124	-0.389337	0.0472844	-8.23395	1.81135e-16	8.57473e-15
FLT4	ENSG00000037280	protein_coding	4870.67	0.531955	0.0774417	6.8691	6.4608e-12	1.19331e-10
NSUN2	ENSG00000037474	protein_coding	3170	-0.0421498	0.0306819	-1.37377	0.169513	0.241673
FBXO42	ENSG00000037637	protein_coding	1813.9	0.0116628	0.0258301	0.45152	0.651615	0.717158
MFAP3	ENSG00000037749	protein_coding	1702.71	0.304428	0.0688101	4.42418	9.68108e-06	4.51252e-05
MRI1	ENSG00000037757	protein_coding	1503.66	0.00516799	0.052934	0.0976309	0.922225	0.940052
METTL1	ENSG00000037897	protein_coding	1085.06	-0.472185	0.0525017	-8.9937	2.39054e-19	2.05139e-17
HOXC8	ENSG00000037965	protein_coding	320.569	-0.369422	0.0849165	-4.35042	1.35879e-05	6.12967e-05
AGA	ENSG00000038002	protein_coding	1394.14	-0.182325	0.0416825	-4.37414	1.21912e-05	5.5626e-05
PI4K2B	ENSG00000038210	protein_coding	815.904	-0.207923	0.0426007	-4.88075	1.05685e-06	6.14036e-06
BOD1L1	ENSG00000038219	protein_coding	3487.08	0.282085	0.0454885	6.20124	5.60205e-10	6.8328e-09
MAT2B	ENSG00000038274	protein_coding	6808.95	0.00456482	0.0434623	0.105029	0.916352	0.935708
TLL1	ENSG00000038295	protein_coding	1043.53	0.403469	0.104779	3.85066	0.0001178	0.000423676
EDC4	ENSG00000038358	protein_coding	1950.07	0.209522	0.0365644	5.73022	1.00299e-08	9.1959e-08
TRIO	ENSG00000038382	protein_coding	5249.04	0.150913	0.0524056	2.87972	0.00398032	0.00967088
VCAN	ENSG00000038427	protein_coding	21415	-0.00097129	0.118523	-0.00819494	0.993461	0.995109
CLEC16A	ENSG00000038532	protein_coding	1775.37	0.0572179	0.0488175	1.17208	0.241166	0.322568
MSR1	ENSG00000038945	protein_coding	3728.54	-0.268906	0.0925676	-2.90497	0.00367283	0.00901854
CDH1	ENSG00000039068	protein_coding	6760.36	0.177985	0.100408	1.77262	0.0762915	0.124275
MTREX	ENSG00000039123	protein_coding	3826.6	0.052981	0.0395921	1.33817	0.18084	0.254869
DNAH5	ENSG00000039139	protein_coding	515.559	-0.286878	0.109277	-2.62524	0.00865887	0.0190899
ZFYVE16	ENSG00000039319	protein_coding	2972.26	0.0724927	0.0437904	1.65545	0.0978339	0.153092
RIPOR1	ENSG00000039523	protein_coding	6490.82	0.133	0.0378159	3.51703	0.000436401	0.00136886
C6	ENSG00000039537	protein_coding	700.491	-0.140003	0.173247	-0.80811	0.419027	0.50385
RAI14	ENSG00000039560	protein_coding	4381.95	0.16117	0.0475289	3.39098	0.000696442	0.00207785
SOX30	ENSG00000039600	protein_coding	15.001	0.361896	0.108055	3.34918	0.00081052	0.00237963
PNKP	ENSG00000039650	protein_coding	1498.71	-0.201713	0.0546341	-3.69207	0.000222436	0.000749314
BEST2	ENSG00000039987	protein_coding	2.43302	-0.594473	0.197288	-3.01322	0.00258489	0.00662065
PHLPP2	ENSG00000040199	protein_coding	840.497	0.0813586	0.0527866	1.54127	0.12325	0.185352
SPDL1	ENSG00000040275	protein_coding	544.324	0.109858	0.0484799	2.26605	0.0234484	0.0453242
STAU2	ENSG00000040341	protein_coding	2354.59	-0.00985799	0.0429168	-0.2297	0.818325	0.857765
SLC66A1	ENSG00000040487	protein_coding	828.187	-0.372154	0.0547551	-6.7967	1.07043e-11	1.87864e-10
CTNS	ENSG00000040531	protein_coding	1210.74	0.0173528	0.0344806	0.503264	0.614779	0.685057
RTN4R	ENSG00000040608	protein_coding	191.332	-0.232326	0.0923447	-2.51585	0.0118744	0.0251657
PHF23	ENSG00000040633	protein_coding	1920.65	-0.0645222	0.0360212	-1.79123	0.0732564	0.120136
CDH10	ENSG00000040731	protein_coding	4.91753	0.0432382	0.209833	0.20606	0.836744	0.87276
INPP4A	ENSG00000040933	protein_coding	1730.54	0.233629	0.0450747	5.18316	2.1816e-07	1.48037e-06
RAB27B	ENSG00000041353	protein_coding	328.011	-0.287134	0.144079	-1.9929	0.0462725	0.0812535
PSMA4	ENSG00000041357	protein_coding	4988.74	-0.283978	0.0350755	-8.09619	5.67061e-16	2.42397e-14
MYO16	ENSG00000041515	protein_coding	24.7282	-0.394543	0.148118	-2.6637	0.00772861	0.0173097
LSG1	ENSG00000041802	protein_coding	2050.47	0.0192723	0.0314382	0.61302	0.539863	0.616909
PARP3	ENSG00000041880	protein_coding	1153.47	-0.00501322	0.05649	-0.0887453	0.929284	0.945817
TNC	ENSG00000041982	protein_coding	8179.95	0.383206	0.115777	3.30986	0.00093344	0.00269867
THAP3	ENSG00000041988	protein_coding	757.4	-0.339535	0.0501101	-6.77577	1.23744e-11	2.13415e-10
RIPOR3	ENSG00000042062	protein_coding	1513.77	0.088488	0.130853	0.676239	0.498889	0.57929
TDP1	ENSG00000042088	protein_coding	810.189	0.0944358	0.0321909	2.93362	0.00335038	0.00831993
AIFM2	ENSG00000042286	protein_coding	1297.24	-0.318999	0.0545219	-5.85084	4.8909e-09	4.83435e-08
C2orf83	ENSG00000042304	protein_coding	1.61653	-0.465256	0.293756	-1.58381	0.113236	0.172999
SPATA7	ENSG00000042317	protein_coding	720.245	0.00157244	0.0417312	0.0376801	0.969943	0.977623
MED17	ENSG00000042429	protein_coding	1648.53	0.0863806	0.0291763	2.96065	0.00306994	0.00770114
RETSAT	ENSG00000042445	protein_coding	5412.83	-0.0305899	0.0476851	-0.641498	0.521199	0.599709
CAPG	ENSG00000042493	protein_coding	8829.41	-0.34595	0.0837209	-4.13219	3.59328e-05	0.000146728
AP2S1	ENSG00000042753	protein_coding	3278.46	-0.345889	0.049255	-7.02242	2.18064e-12	4.47294e-11
USH2A	ENSG00000042781	protein_coding	40.9201	-0.921858	0.112273	-8.21089	2.19555e-16	1.01739e-14
ZPBP	ENSG00000042813	protein_coding	1.61362	0.092214	0.241417	0.38197	0.702484	0.760792
TG	ENSG00000042832	protein_coding	119.713	-0.386346	0.101757	-3.79674	0.000146614	0.000514901
ADAM28	ENSG00000042980	protein_coding	1256.4	-0.178146	0.0770576	-2.31185	0.020786	0.0408965
BARX2	ENSG00000043039	protein_coding	2802.01	-0.217097	0.0970085	-2.23792	0.0252263	0.0482659
DCUN1D1	ENSG00000043093	protein_coding	1799.38	-0.148196	0.0412997	-3.58832	0.000332814	0.00107302
JADE2	ENSG00000043143	protein_coding	4442.68	0.259622	0.040159	6.46485	1.01398e-10	1.43542e-09
ZIC2	ENSG00000043355	protein_coding	14.7983	-0.850925	0.258857	-3.28723	0.00101177	0.0028997
LCP2	ENSG00000043462	protein_coding	3099.37	-0.159327	0.0663899	-2.39986	0.0164013	0.0333129
TRIT1	ENSG00000043514	protein_coding	1004.25	-0.130682	0.0358017	-3.65017	0.000262066	0.000867822
ADRB1	ENSG00000043591	protein_coding	20.3513	-0.0313053	0.132528	-0.236217	0.813264	0.853652
GUCA2B	ENSG00000044012	protein_coding	124.404	-1.50441	0.217018	-6.93221	4.14326e-12	7.98406e-11
CUL7	ENSG00000044090	protein_coding	3607.79	0.117221	0.03572	3.28166	0.00103199	0.00294807
CTNNA1	ENSG00000044115	protein_coding	28709.5	0.0716627	0.0345226	2.07582	0.0379104	0.0684992
PHKA2	ENSG00000044446	protein_coding	8497.07	-0.124946	0.0631477	-1.97863	0.0478577	0.0836268
CNTLN	ENSG00000044459	protein_coding	855.91	0.104248	0.0488536	2.13388	0.0328525	0.0606345
EPHA3	ENSG00000044524	protein_coding	1094.03	0.25544	0.100604	2.53906	0.0111152	0.0237644
HSPA5	ENSG00000044574	protein_coding	35197.2	-0.130134	0.0491676	-2.64673	0.0081273	0.0180921
DSG2	ENSG00000046604	protein_coding	9874.25	0.347461	0.0950701	3.65479	0.000257391	0.000853945
GEMIN8	ENSG00000046647	protein_coding	1095.42	-0.0948084	0.037722	-2.51334	0.0119592	0.0253104
OFD1	ENSG00000046651	protein_coding	2182.79	-0.193017	0.0490697	-3.93353	8.3708e-05	0.00031267
GPM6B	ENSG00000046653	protein_coding	278.553	0.538444	0.104496	5.15275	2.56693e-07	1.71568e-06
MAGEC2	ENSG00000046774	protein_coding	3.34292	1.62211	0.549562	2.95165	0.00316081	0.00790107
PREX2	ENSG00000046889	protein_coding	3592.58	-0.247211	0.116334	-2.12502	0.0335853	0.0618078
WDR37	ENSG00000047056	protein_coding	1429.55	0.171461	0.0329221	5.20809	1.90791e-07	1.31136e-06
YTHDC2	ENSG00000047188	protein_coding	2675.65	-0.0254689	0.0411856	-0.618394	0.536316	0.613636
CTPS2	ENSG00000047230	protein_coding	1166.47	-0.000426193	0.0331986	-0.0128377	0.989757	0.992443
ATP6V1H	ENSG00000047249	protein_coding	2867.07	-0.0278884	0.0613594	-0.454509	0.649462	0.715253
POLR2B	ENSG00000047315	protein_coding	4353.75	0.142087	0.0326369	4.35357	1.33939e-05	6.05169e-05
FAM214A	ENSG00000047346	protein_coding	2238.19	0.104142	0.0445045	2.34002	0.0192825	0.0383292
ARAP2	ENSG00000047365	protein_coding	1432.43	-0.124419	0.0628838	-1.97856	0.0478655	0.0836373
TPR	ENSG00000047410	protein_coding	6934.81	0.183364	0.0376032	4.8763	1.08094e-06	6.26684e-06
CP	ENSG00000047457	protein_coding	28639.5	-0.565927	0.166207	-3.40496	0.000661735	0.00198451
KIAA0556	ENSG00000047578	protein_coding	1286.51	0.118676	0.0388335	3.05601	0.00224306	0.00583548
DTNBP1	ENSG00000047579	protein_coding	1339.24	-0.0582668	0.038735	-1.50424	0.132519	0.196814
XK	ENSG00000047597	protein_coding	79.2286	-0.0247109	0.158993	-0.155421	0.876489	0.904228
ANO2	ENSG00000047617	protein_coding	199.146	0.114443	0.0870397	1.31483	0.188566	0.263778
C12orf4	ENSG00000047621	protein_coding	1125.47	-0.0763646	0.0366221	-2.0852	0.0370508	0.0671605
SCML1	ENSG00000047634	protein_coding	755.716	-0.0887975	0.0735651	-1.20706	0.227409	0.307306
WWC3	ENSG00000047644	protein_coding	4631.49	-0.00948066	0.0378259	-0.250639	0.802093	0.84444
ARHGAP6	ENSG00000047648	protein_coding	1224.04	0.371986	0.0758124	4.90666	9.2639e-07	5.45081e-06
FAM184B	ENSG00000047662	protein_coding	33.7275	-0.255882	0.11444	-2.23595	0.025355	0.0484758
MAP4	ENSG00000047849	protein_coding	16123.1	0.257427	0.0312278	8.24353	1.67209e-16	7.97313e-15
GOPC	ENSG00000047932	protein_coding	2287.81	0.135242	0.0339751	3.98062	6.87352e-05	0.000262368
ROS1	ENSG00000047936	protein_coding	8.1979	0.815362	0.258908	3.14924	0.00163695	0.00442468
USP28	ENSG00000048028	protein_coding	1229.97	0.0703204	0.0395824	1.77656	0.0756413	0.123422
HDAC9	ENSG00000048052	protein_coding	582.161	0.114209	0.066551	1.71611	0.086141	0.137734
TSPAN17	ENSG00000048140	protein_coding	2441.87	-0.200716	0.0489033	-4.10434	4.05478e-05	0.000163245
NOP16	ENSG00000048162	protein_coding	1047.88	-0.45229	0.0504167	-8.97104	2.93715e-19	2.45158e-17
CC2D2A	ENSG00000048342	protein_coding	1728.99	0.0750804	0.0571601	1.31351	0.189011	0.26432
RRM2B	ENSG00000048392	protein_coding	4657.16	-0.153277	0.0565878	-2.70866	0.00675555	0.015409
ZNF800	ENSG00000048405	protein_coding	1515.96	-0.0804118	0.0414364	-1.94061	0.052306	0.0902233
TNFRSF17	ENSG00000048462	protein_coding	43.8782	-1.46258	0.165466	-8.83911	9.64865e-19	7.18926e-17
SNX29	ENSG00000048471	protein_coding	5560.83	0.216362	0.0604019	3.58204	0.000340924	0.00109616
LMO3	ENSG00000048540	protein_coding	84.2018	-0.405609	0.129656	-3.12833	0.001758	0.00470964
MRPS10	ENSG00000048544	protein_coding	1797.14	-0.0823342	0.0378161	-2.17723	0.0294634	0.0552111
GUCA1A	ENSG00000048545	protein_coding	1.75454	-0.0639758	0.240744	-0.265742	0.790438	0.834682
RSF1	ENSG00000048649	protein_coding	3278.1	0.212998	0.0397027	5.36483	8.10267e-08	6.07588e-07
VPS13D	ENSG00000048707	protein_coding	3890.27	0.376462	0.0548439	6.86425	6.68437e-12	1.22915e-10
CELF2	ENSG00000048740	protein_coding	2188.65	0.0515698	0.0725701	0.710621	0.477319	0.559332
FAM120A	ENSG00000048828	protein_coding	11159.8	0.0983844	0.0379214	2.59443	0.00947488	0.0206633
R3HDM1	ENSG00000048991	protein_coding	1429.69	0.0784602	0.0322198	2.43515	0.0148854	0.0306525
COL9A2	ENSG00000049089	protein_coding	351.718	0.422538	0.118916	3.55326	0.000380491	0.00121056
KITLG	ENSG00000049130	protein_coding	2397.59	0.441714	0.0913997	4.83277	1.34645e-06	7.66361e-06
ERCC8	ENSG00000049167	protein_coding	428.306	-0.0697477	0.0400893	-1.73981	0.0818927	0.131931
ADAMTS6	ENSG00000049192	protein_coding	75.5178	0.173159	0.0986538	1.75522	0.0792214	0.128295
H6PD	ENSG00000049239	protein_coding	8392.1	0.0742604	0.0518688	1.4317	0.152231	0.220991
VAMP3	ENSG00000049245	protein_coding	7174.36	0.0726729	0.0323401	2.24714	0.024631	0.047277
PER3	ENSG00000049246	protein_coding	2149.97	0.352979	0.0702629	5.0237	5.06861e-07	3.16998e-06
UTS2	ENSG00000049247	protein_coding	21.2168	0.051506	0.159722	0.322473	0.747094	0.798871
TNFRSF9	ENSG00000049249	protein_coding	570.745	-0.402834	0.145213	-2.77409	0.00553567	0.0129362
EPN3	ENSG00000049283	protein_coding	56.325	0.625269	0.189319	3.30272	0.000957507	0.00276108
LTBP1	ENSG00000049323	protein_coding	4531.72	0.295276	0.104102	2.8364	0.00456248	0.0109067
RCN1	ENSG00000049449	protein_coding	7848.75	-0.2024	0.0542572	-3.73038	0.000191194	0.000653193
ELN	ENSG00000049540	protein_coding	2884.26	0.332477	0.122368	2.71703	0.00658713	0.015063
RFC2	ENSG00000049541	protein_coding	1621.74	-0.320073	0.0381265	-8.39503	4.65784e-17	2.51107e-15
ARID1B	ENSG00000049618	protein_coding	3661.71	0.324446	0.0330675	9.81165	1.00319e-22	1.64179e-20
CLPTM1L	ENSG00000049656	protein_coding	11163.3	-0.31238	0.0492299	-6.34533	2.21954e-10	2.93073e-09
NEDD4L	ENSG00000049759	protein_coding	6078.02	0.189603	0.0940176	2.01667	0.0437295	0.0774021
FOXP3	ENSG00000049768	protein_coding	178.339	-0.813462	0.113175	-7.18767	6.5906e-13	1.52683e-11
PPP1R3F	ENSG00000049769	protein_coding	304.448	-0.0642158	0.049841	-1.28841	0.197603	0.274143
HEXB	ENSG00000049860	protein_coding	7568.52	-0.161993	0.0473482	-3.42132	0.000623184	0.00188146
PTCD2	ENSG00000049883	protein_coding	707.88	0.050594	0.0404418	1.25103	0.210923	0.289035
NEXMIF	ENSG00000050030	protein_coding	72.2471	0.643103	0.184258	3.49023	0.000482598	0.00149625
JKAMP	ENSG00000050130	protein_coding	2412.91	0.0481007	0.0366973	1.31074	0.189944	0.265331
DKK3	ENSG00000050165	protein_coding	5180.15	0.417279	0.0824314	5.06214	4.14583e-07	2.64742e-06
ARHGEF5	ENSG00000050327	protein_coding	699.526	0.0726613	0.0544431	1.33463	0.181998	0.256233
NFE2L3	ENSG00000050344	protein_coding	2331.35	-0.673963	0.076127	-8.85313	8.50987e-19	6.45623e-17
MCUR1	ENSG00000050393	protein_coding	1966.28	-0.0890831	0.0343587	-2.59274	0.00952154	0.0207532
LIMA1	ENSG00000050405	protein_coding	6599.07	0.195928	0.0638912	3.06659	0.00216518	0.00565808
LETMD1	ENSG00000050426	protein_coding	4087.77	-0.106647	0.0474688	-2.24668	0.0246602	0.0473251
SLC4A8	ENSG00000050438	protein_coding	128.036	0.021872	0.0726376	0.301112	0.763329	0.812431
LAMC3	ENSG00000050555	protein_coding	1556.94	0.718592	0.127294	5.64515	1.65036e-08	1.44628e-07
PTGER3	ENSG00000050628	protein_coding	4668.87	0.220393	0.153948	1.43161	0.152255	0.22102
TNIP3	ENSG00000050730	protein_coding	95.6639	-0.62148	0.149743	-4.15032	3.3201e-05	0.00013678
MAPK9	ENSG00000050748	protein_coding	3156.24	-0.124893	0.0333742	-3.74219	0.000182426	0.000626649
COL23A1	ENSG00000050767	protein_coding	12567.1	-0.147424	0.114399	-1.28868	0.19751	0.27404
BCAR1	ENSG00000050820	protein_coding	5570.13	0.0287779	0.0534979	0.537926	0.590628	0.663259
FAM160A2	ENSG00000051009	protein_coding	2358.47	0.0656858	0.040643	1.61616	0.106059	0.163775
HERPUD1	ENSG00000051108	protein_coding	14507.3	-0.107954	0.0521574	-2.06977	0.0384739	0.0693641
HOMER3	ENSG00000051128	protein_coding	1927.22	-0.193673	0.0647789	-2.98975	0.00279203	0.00708427
RAD51	ENSG00000051180	protein_coding	144.226	-0.00584829	0.0718873	-0.0813536	0.935161	0.9507
POLQ	ENSG00000051341	protein_coding	113.681	-0.10193	0.0941465	-1.08267	0.278955	0.36317
PIK3CB	ENSG00000051382	protein_coding	4028.87	0.0804095	0.052305	1.53732	0.124215	0.186568
CYBA	ENSG00000051523	protein_coding	8022.95	-0.589099	0.0741455	-7.94518	1.93911e-15	7.44201e-14
THOC3	ENSG00000051596	protein_coding	393.697	-0.0903911	0.0501363	-1.80291	0.0714025	0.117527
HEBP2	ENSG00000051620	protein_coding	3422.13	-0.51962	0.0516624	-10.058	8.4707e-24	1.74063e-21
MPHOSPH9	ENSG00000051825	protein_coding	916.426	-0.0124116	0.0568947	-0.218151	0.827312	0.865048
PLEKHA5	ENSG00000052126	protein_coding	3938	-0.396465	0.0623922	-6.3544	2.09236e-10	2.77672e-09
PRSS8	ENSG00000052344	protein_coding	2381.62	-0.138281	0.114379	-1.20897	0.226673	0.306574
SIKE1	ENSG00000052723	protein_coding	1863.28	-0.0249083	0.0315734	-0.788902	0.430169	0.514662
RRP12	ENSG00000052749	protein_coding	1560.71	-0.0878165	0.0519058	-1.69184	0.0906757	0.143741
FNIP2	ENSG00000052795	protein_coding	5224.02	0.360495	0.0732057	4.92441	8.46133e-07	5.0283e-06
MSMO1	ENSG00000052802	protein_coding	2595.75	-0.303384	0.0588375	-5.1563	2.51881e-07	1.68623e-06
TTC17	ENSG00000052841	protein_coding	4661.72	-0.0509305	0.0255688	-1.99191	0.0463814	0.0814073
ALX4	ENSG00000052850	protein_coding	20.6402	0.463008	0.120146	3.8537	0.000116346	0.000419006
FSTL4	ENSG00000053108	protein_coding	75.1414	1.41458	0.146789	9.6368	5.59055e-22	8.15864e-20
FOXN3	ENSG00000053254	protein_coding	4698.76	0.257084	0.0562051	4.57404	4.78413e-06	2.39149e-05
METTL24	ENSG00000053328	protein_coding	119.7	0.357122	0.0994869	3.58964	0.000331141	0.00106815
AKR7A2	ENSG00000053371	protein_coding	3638.73	-0.182376	0.063442	-2.87468	0.00404436	0.00980783
MRTO4	ENSG00000053372	protein_coding	1838.18	-0.19173	0.0399467	-4.79964	1.5895e-06	8.88582e-06
NNAT	ENSG00000053438	protein_coding	38.105	0.044177	0.118502	0.372796	0.7093	0.766507
USE1	ENSG00000053501	protein_coding	1509.03	-0.334224	0.0509226	-6.56338	5.26018e-11	7.93425e-10
MCF2L2	ENSG00000053524	protein_coding	67.1682	-0.0170101	0.102914	-0.165284	0.86872	0.898525
NRIP2	ENSG00000053702	protein_coding	1854.97	0.223391	0.0795679	2.80755	0.00499199	0.0118175
LAMA3	ENSG00000053747	protein_coding	1450.22	0.343465	0.0921522	3.72715	0.000193657	0.000660818
AP5M1	ENSG00000053770	protein_coding	2357.82	-0.00925736	0.0591954	-0.156387	0.875728	0.903794
ANAPC4	ENSG00000053900	protein_coding	1388.7	-0.153366	0.0360606	-4.25301	2.10919e-05	9.09234e-05
KCNQ1	ENSG00000053918	protein_coding	1440.18	0.260766	0.091644	2.84543	0.00443517	0.0106318
TRAPPC3	ENSG00000054116	protein_coding	2759.24	-0.272065	0.0294192	-9.24787	2.29006e-20	2.49856e-18
THRAP3	ENSG00000054118	protein_coding	7443.48	0.191371	0.0232662	8.2253	1.9471e-16	9.12073e-15
PHPT1	ENSG00000054148	protein_coding	5054.69	-0.488138	0.06886	-7.08884	1.35239e-12	2.9198e-11
ENTPD2	ENSG00000054179	protein_coding	786.02	-0.276514	0.106577	-2.59449	0.00947313	0.0206604
LY75	ENSG00000054219	protein_coding	731.718	-0.0357621	0.0833827	-0.428891	0.668002	0.731382
ARID4B	ENSG00000054267	protein_coding	2643.67	0.127989	0.0364836	3.50813	0.000451266	0.00141017
OPN3	ENSG00000054277	protein_coding	596.942	-0.00435258	0.083055	-0.052406	0.958205	0.968669
SDCCAG8	ENSG00000054282	protein_coding	1293.11	-0.0789696	0.029254	-2.69944	0.00694555	0.0157928
PTPRN	ENSG00000054356	protein_coding	355.977	-0.662212	0.169239	-3.91287	9.12052e-05	0.000337537
HHAT	ENSG00000054392	protein_coding	803.42	0.397826	0.0593477	6.70331	2.03745e-11	3.35359e-10
KIF1B	ENSG00000054523	protein_coding	4474.05	0.253082	0.0413972	6.11352	9.74567e-10	1.12678e-08
FOXC1	ENSG00000054598	protein_coding	1033.01	0.356461	0.0745224	4.78327	1.7247e-06	9.56466e-06
TBC1D22A	ENSG00000054611	protein_coding	2415.84	-0.0555929	0.0353541	-1.57246	0.115844	0.176239
SYNE2	ENSG00000054654	protein_coding	11568.1	0.258924	0.0599977	4.31556	1.592e-05	7.06625e-05
PLEKHH1	ENSG00000054690	protein_coding	1030.72	0.406141	0.085609	4.74414	2.09391e-06	1.13848e-05
ATP9A	ENSG00000054793	protein_coding	3514.24	0.427476	0.0828484	5.15973	2.47303e-07	1.65727e-06
SPO11	ENSG00000054796	protein_coding	0.347562	-0.584842	0.430068	-1.35988	0.173867	0.246787
CBLN4	ENSG00000054803	protein_coding	281.627	-0.0176424	0.146251	-0.120631	0.903984	0.926114
CHRDL2	ENSG00000054938	protein_coding	132.273	-1.11782	0.171401	-6.52166	6.95313e-11	1.0245e-09
FAM168A	ENSG00000054965	protein_coding	4949.08	0.22105	0.0311092	7.10562	1.1978e-12	2.61996e-11
RELT	ENSG00000054967	protein_coding	505.767	-0.072064	0.0627775	-1.14793	0.250999	0.333358
GALC	ENSG00000054983	protein_coding	3272.65	0.068623	0.0531703	1.29063	0.196833	0.273283
NOP58	ENSG00000055044	protein_coding	2351.81	-0.139207	0.0355895	-3.91147	9.17358e-05	0.000339254
SZRD1	ENSG00000055070	protein_coding	7373.12	-0.00988329	0.0329917	-0.299569	0.764506	0.813428
KCNH2	ENSG00000055118	protein_coding	192.838	-0.160896	0.158036	-1.0181	0.308632	0.394267
CUL1	ENSG00000055130	protein_coding	3726.2	-0.0547523	0.0289124	-1.89373	0.0582609	0.0988685
FAM114A2	ENSG00000055147	protein_coding	1767.11	-0.067799	0.033946	-1.99726	0.0457971	0.0805595
CYFIP2	ENSG00000055163	protein_coding	11037	0.24896	0.0726896	3.42497	0.000614861	0.00185915
TAB2	ENSG00000055208	protein_coding	4341.21	0.153134	0.0439514	3.48417	0.000493665	0.00152695
GINM1	ENSG00000055211	protein_coding	4372.59	-0.0207973	0.04235	-0.491081	0.623369	0.692592
EIF2AK2	ENSG00000055332	protein_coding	4057.06	0.0664017	0.0413218	1.60694	0.108067	0.166294
USP36	ENSG00000055483	protein_coding	3042.55	0.191834	0.0377428	5.08267	3.72169e-07	2.40235e-06
KMT2C	ENSG00000055609	protein_coding	4812.63	0.164343	0.0481911	3.41025	0.000649044	0.00195028
MCOLN3	ENSG00000055732	protein_coding	169.526	0.939692	0.175018	5.3691	7.91295e-08	5.94627e-07
CCDC85A	ENSG00000055813	protein_coding	175.612	0.846867	0.0989574	8.55789	1.14948e-17	7.01385e-16
PUM2	ENSG00000055917	protein_coding	7391.05	0.0902347	0.0285791	3.15737	0.001592	0.00431616
MRPL43	ENSG00000055950	protein_coding	3191.27	-0.30764	0.0486878	-6.31863	2.63894e-10	3.41987e-09
ITIH4	ENSG00000055955	protein_coding	56.544	-1.02078	0.152008	-6.71533	1.87637e-11	3.10744e-10
ITIH1	ENSG00000055957	protein_coding	47.6384	-0.0685937	0.216486	-0.31685	0.751357	0.802475
HPF1	ENSG00000056050	protein_coding	876.976	-0.156523	0.0329734	-4.74694	2.06515e-06	1.12494e-05
ZFR	ENSG00000056097	protein_coding	5913.61	0.0903222	0.0327752	2.75581	0.00585462	0.0135894
ZNF280C	ENSG00000056277	protein_coding	227.896	0.0716214	0.0427192	1.67656	0.0936284	0.147595
NPFFR2	ENSG00000056291	protein_coding	4.72857	0.521451	0.216017	2.41393	0.0157813	0.0322178
PHF21B	ENSG00000056487	protein_coding	12.1509	0.539399	0.187336	2.87932	0.00398537	0.00968117
TRAF1	ENSG00000056558	protein_coding	1437.34	-0.210611	0.0734822	-2.86615	0.00415494	0.0100351
RC3H2	ENSG00000056586	protein_coding	3270.14	0.373922	0.0474693	7.87714	3.34968e-15	1.23588e-13
IL17RB	ENSG00000056736	protein_coding	2036.59	-0.731058	0.1218	-6.00214	1.9473e-09	2.10953e-08
TRAF3IP2	ENSG00000056972	protein_coding	2580.52	-0.222535	0.0502262	-4.43066	9.39432e-06	4.39316e-05
GYG2	ENSG00000056998	protein_coding	114.273	0.468658	0.192296	2.43717	0.0148027	0.0304973
DCBLD2	ENSG00000057019	protein_coding	3658.28	0.442612	0.0895333	4.94355	7.67144e-07	4.60487e-06
SERPINB3	ENSG00000057149	protein_coding	2.01006	-0.86966	0.35483	-2.45092	0.0142492	0.0294817
SOAT1	ENSG00000057252	protein_coding	4462.22	-0.195873	0.0599826	-3.26549	0.00109275	0.00309896
PKP2	ENSG00000057294	protein_coding	1118.65	-0.108886	0.0811933	-1.34107	0.179897	0.253688
MSH4	ENSG00000057468	protein_coding	30.8855	-0.6665	0.129485	-5.1473	2.64259e-07	1.7606e-06
F7	ENSG00000057593	protein_coding	15.4244	0.242391	0.179587	1.34971	0.177109	0.250589
GDI2	ENSG00000057608	protein_coding	15377	-0.0106683	0.0420847	-0.253496	0.799885	0.842658
PRDM1	ENSG00000057657	protein_coding	2221.64	0.152972	0.0653818	2.33967	0.0193008	0.0383622
ATG5	ENSG00000057663	protein_coding	1636.28	-0.0790015	0.0387855	-2.03688	0.0416618	0.0742411
TMCC3	ENSG00000057704	protein_coding	3306.03	0.522734	0.0684723	7.63424	2.27165e-14	7.01456e-13
PITHD1	ENSG00000057757	protein_coding	2009.63	-0.117026	0.0295825	-3.95594	7.62358e-05	0.000287644
MTA3	ENSG00000057935	protein_coding	1915.14	-0.000469138	0.0331108	-0.0141687	0.988695	0.991508
USP13	ENSG00000058056	protein_coding	995.649	0.388886	0.0541312	7.18413	6.76358e-13	1.56337e-11
ATP11B	ENSG00000058063	protein_coding	3623.37	0.169803	0.0465355	3.64889	0.000263372	0.000871578
LAMC2	ENSG00000058085	protein_coding	1182.54	0.765532	0.158278	4.83662	1.32063e-06	7.5279e-06
CDK14	ENSG00000058091	protein_coding	2934.24	-0.077873	0.0591725	-1.31603	0.188163	0.263294
SEC61A1	ENSG00000058262	protein_coding	20010.8	-0.188168	0.0447421	-4.20561	2.60381e-05	0.000109919
PPP1R12A	ENSG00000058272	protein_coding	3856.05	0.166256	0.037821	4.39586	1.10336e-05	5.07176e-05
RASGRF1	ENSG00000058335	protein_coding	70.9027	0.680298	0.118991	5.71723	1.08276e-08	9.88585e-08
CAMK2B	ENSG00000058404	protein_coding	158.67	0.0740033	0.175344	0.422045	0.672992	0.735615
CROCC	ENSG00000058453	protein_coding	1108.33	0.090621	0.064926	1.39576	0.162787	0.233649
POLR3E	ENSG00000058600	protein_coding	1644.96	-0.0575115	0.0325248	-1.76823	0.0770222	0.125274
ATP2B4	ENSG00000058668	protein_coding	10652.6	0.169957	0.0498256	3.41104	0.00064716	0.001945
ZC3H11A	ENSG00000058673	protein_coding	6442.17	0.114046	0.0338569	3.36846	0.000755887	0.00223715
RIOK2	ENSG00000058729	protein_coding	1352.24	-0.0574675	0.0340639	-1.68705	0.0915936	0.144935
YIPF1	ENSG00000058799	protein_coding	1588.32	-0.16899	0.035426	-4.77022	1.84025e-06	1.01197e-05
NDC1	ENSG00000058804	protein_coding	1212.13	0.063277	0.0405272	1.56135	0.118442	0.179427
DGKG	ENSG00000058866	protein_coding	289.508	-0.264654	0.0933548	-2.83493	0.00458359	0.0109526
FLYWCH1	ENSG00000059122	protein_coding	2430.01	-0.0248012	0.0432312	-0.573689	0.566178	0.641065
UNKL	ENSG00000059145	protein_coding	578.541	0.2051	0.0502175	4.08424	4.42223e-05	0.000176366
TBXAS1	ENSG00000059377	protein_coding	1800.18	-0.236397	0.0589659	-4.00904	6.09667e-05	0.000235302
PARP12	ENSG00000059378	protein_coding	2532.45	-0.266366	0.0397756	-6.69671	2.13159e-11	3.49599e-10
ALDH18A1	ENSG00000059573	protein_coding	4965.76	-0.242484	0.0477259	-5.08076	3.75933e-07	2.42221e-06
TARBP1	ENSG00000059588	protein_coding	1586.18	-0.259332	0.0540399	-4.7989	1.59539e-06	8.91334e-06
GATB	ENSG00000059691	protein_coding	1534.79	-0.134337	0.0443351	-3.03003	0.00244533	0.00629521
MXD1	ENSG00000059728	protein_coding	1365.97	-0.0989731	0.0563994	-1.75486	0.079283	0.128382
CDK17	ENSG00000059758	protein_coding	2499.3	0.0980825	0.0426777	2.29821	0.0215497	0.0421573
DNAJC25	ENSG00000059769	protein_coding	658.296	-0.114978	0.0451267	-2.5479	0.0108375	0.0232602
SLC2A3	ENSG00000059804	protein_coding	8016.64	-0.0675398	0.0948778	-0.711861	0.476551	0.558631
PSD	ENSG00000059915	protein_coding	149.009	0.136646	0.065648	2.0815	0.0373885	0.0677136
CTDP1	ENSG00000060069	protein_coding	1261.5	0.00172356	0.0382969	0.0450052	0.964103	0.973193
YBX3	ENSG00000060138	protein_coding	17448.7	-0.332478	0.0525406	-6.32802	2.48326e-10	3.23643e-09
STYK1	ENSG00000060140	protein_coding	30.4252	-0.511279	0.111775	-4.57416	4.78128e-06	2.39033e-05
WNK1	ENSG00000060237	protein_coding	9936.4	0.250384	0.0470019	5.32711	9.97896e-08	7.30823e-07
CCAR1	ENSG00000060339	protein_coding	2983.22	-0.0669532	0.0329683	-2.03084	0.0422717	0.075173
OGFR	ENSG00000060491	protein_coding	3373.3	-0.224472	0.0481285	-4.66401	3.10103e-06	1.62013e-05
GNA15	ENSG00000060558	protein_coding	434.703	-0.200188	0.0759063	-2.6373	0.00835678	0.0185282
CREB3L3	ENSG00000060566	protein_coding	1280.39	-1.07178	0.163039	-6.57379	4.90508e-11	7.44766e-10
PIGV	ENSG00000060642	protein_coding	1128.65	0.0462307	0.0386991	1.19462	0.232236	0.312576
PTPRU	ENSG00000060656	protein_coding	2723.76	0.17026	0.0916975	1.85676	0.0633455	0.106195
SNRNP40	ENSG00000060688	protein_coding	1311.7	0.0485049	0.0311053	1.55938	0.118907	0.180024
RIMBP2	ENSG00000060709	protein_coding	30.759	0.771016	0.142175	5.42299	5.86087e-08	4.52822e-07
COL11A1	ENSG00000060718	protein_coding	337.576	-0.0652832	0.198949	-0.328139	0.742806	0.795344
QSER1	ENSG00000060749	protein_coding	2414.76	0.142049	0.0493791	2.87671	0.00401847	0.00975331
MPC1	ENSG00000060762	protein_coding	2385.32	-0.0171779	0.0719258	-0.238828	0.811239	0.851955
ACAA1	ENSG00000060971	protein_coding	2784.86	-0.142342	0.047561	-2.99284	0.00276398	0.00702088
BCAT1	ENSG00000060982	protein_coding	1612.5	0.372268	0.100006	3.72246	0.00019729	0.000672066
HDAC7	ENSG00000061273	protein_coding	5670.52	0.115232	0.0458536	2.51305	0.0119693	0.0253272
LZTS1	ENSG00000061337	protein_coding	2666.38	0.33279	0.0821146	4.05275	5.06197e-05	0.000199364
PRDM6	ENSG00000061455	protein_coding	101.94	-0.29559	0.0926611	-3.19002	0.00142265	0.0039107
WNT8A	ENSG00000061492	protein_coding	1.07696	-0.49203	0.209042	-2.35374	0.0185857	0.0371145
SPAG4	ENSG00000061656	protein_coding	2822.91	-0.773016	0.0747159	-10.3461	4.36039e-25	1.05164e-22
NCKAP1	ENSG00000061676	protein_coding	11414.1	0.0805308	0.0429433	1.87528	0.0607541	0.102417
MRPS35	ENSG00000061794	protein_coding	3761.32	-0.102298	0.0508993	-2.00981	0.0444512	0.0785096
GUCY1B1	ENSG00000061918	protein_coding	4124.9	-0.0336351	0.0586492	-0.573497	0.566308	0.641165
SFSWAP	ENSG00000061936	protein_coding	2485.62	-0.123112	0.0465085	-2.64708	0.00811895	0.0180752
TNK2	ENSG00000061938	protein_coding	2291.5	0.146283	0.0646297	2.2634	0.0236113	0.0455986
MON2	ENSG00000061987	protein_coding	3438.85	-0.0258112	0.0434231	-0.594412	0.552237	0.628401
CDH3	ENSG00000062038	protein_coding	243.705	1.37231	0.158008	8.6851	3.78419e-18	2.54262e-16
ARSF	ENSG00000062096	protein_coding	198.717	-0.036737	0.167707	-0.219054	0.826608	0.864422
GPBP1	ENSG00000062194	protein_coding	5825.72	-0.0174926	0.0283946	-0.616052	0.53786	0.614988
DGAT2	ENSG00000062282	protein_coding	148.983	-0.50297	0.122003	-4.1226	3.74616e-05	0.000152256
ZNF112	ENSG00000062370	protein_coding	285.475	0.349621	0.0471995	7.40729	1.28902e-13	3.4282e-12
CS	ENSG00000062485	protein_coding	8767	0.0207571	0.0445601	0.465822	0.641343	0.708289
LTK	ENSG00000062524	protein_coding	47.9429	0.0388734	0.115563	0.336383	0.736582	0.790028
MRPS24	ENSG00000062582	protein_coding	453.446	-0.280459	0.0673081	-4.16679	3.08915e-05	0.00012806
ELMO2	ENSG00000062598	protein_coding	2305.6	0.0691559	0.0339764	2.03541	0.0418098	0.0744846
WAPL	ENSG00000062650	protein_coding	3766.78	0.135917	0.0359864	3.7769	0.00015879	0.000553128
VMP1	ENSG00000062716	protein_coding	12618.2	-0.321726	0.0740784	-4.34305	1.40517e-05	6.31403e-05
APPBP2	ENSG00000062725	protein_coding	2893.64	0.148993	0.0398589	3.73802	0.000185472	0.000636159
POLD1	ENSG00000062822	protein_coding	897.997	0.0140089	0.0457775	0.306022	0.759588	0.809304
SEZ6	ENSG00000063015	protein_coding	9.48283	-0.782629	0.140921	-5.55368	2.79717e-08	2.32542e-07
EIF4B	ENSG00000063046	protein_coding	30275.4	0.198385	0.0497433	3.98817	6.65863e-05	0.000254908
SLC6A16	ENSG00000063127	protein_coding	171.808	-0.190758	0.120624	-1.58143	0.113779	0.173684
BICRA	ENSG00000063169	protein_coding	692.382	-0.0638211	0.0497987	-1.28158	0.19999	0.276901
SPHK2	ENSG00000063176	protein_coding	675.407	0.17065	0.0459805	3.71136	0.000206149	0.000699436
RPL18	ENSG00000063177	protein_coding	36897	-0.491233	0.0637852	-7.70136	1.34627e-14	4.3815e-13
CA11	ENSG00000063180	protein_coding	557.967	0.114291	0.0764349	1.49527	0.134844	0.199738
ISOC2	ENSG00000063241	protein_coding	4677.4	-0.629812	0.0662631	-9.50471	2.00613e-21	2.64925e-19
U2AF2	ENSG00000063244	protein_coding	6569.83	0.0374294	0.0298107	1.25557	0.209272	0.287254
EPN1	ENSG00000063245	protein_coding	8620.61	-0.188033	0.0484967	-3.87723	0.000105651	0.000384662
MED29	ENSG00000063322	protein_coding	5299.54	-0.0826308	0.0295731	-2.79412	0.00520409	0.012257
AHRR	ENSG00000063438	protein_coding	248.46	-0.35813	0.114714	-3.12194	0.00179664	0.00479829
GSC2	ENSG00000063515	protein_coding	0.148588	-0.217732	0.443539	-0.490898	0.623499
ZNF275	ENSG00000063587	protein_coding	1613.84	0.16522	0.0477505	3.46006	0.000540058	0.00165381
MTMR1	ENSG00000063601	protein_coding	1693.64	-0.0100882	0.0330981	-0.304799	0.76052	0.810071
GPC1	ENSG00000063660	protein_coding	3399.37	-0.104934	0.0762047	-1.377	0.168512	0.24046
ADCK1	ENSG00000063761	protein_coding	336.719	0.0614307	0.0655832	0.936683	0.348922	0.435266
HAGH	ENSG00000063854	protein_coding	2644.42	-0.406233	0.0543	-7.48127	7.36085e-14	2.0344e-12
RNF4	ENSG00000063978	protein_coding	3832.04	0.0334263	0.0257949	1.29585	0.195027	0.271194
CASP8	ENSG00000064012	protein_coding	2120.92	-0.275875	0.0389099	-7.0901	1.34012e-12	2.89668e-11
LIMCH1	ENSG00000064042	protein_coding	5306.16	0.290983	0.0693678	4.19479	2.7313e-05	0.00011467
INTS13	ENSG00000064102	protein_coding	1629.16	-0.153968	0.0346635	-4.44179	8.92156e-06	4.19347e-05
TM7SF3	ENSG00000064115	protein_coding	7823.41	-0.0457498	0.0587019	-0.779358	0.435769	0.519828
DLX3	ENSG00000064195	protein_coding	14.6652	0.24608	0.128184	1.91974	0.0548905	0.0940088
SPA17	ENSG00000064199	protein_coding	533.655	-0.323496	0.0499648	-6.47449	9.51319e-11	1.3572e-09
TSPAN32	ENSG00000064201	protein_coding	134.21	-0.136036	0.0862481	-1.57727	0.114734	0.174798
CCN5	ENSG00000064205	protein_coding	401.34	-1.0156	0.194847	-5.2123	1.86509e-07	1.28404e-06
DMRT3	ENSG00000064218	protein_coding	10.0087	-1.38706	0.292018	-4.74992	2.03493e-06	1.10989e-05
ST3GAL6	ENSG00000064225	protein_coding	803.179	0.0407517	0.106085	0.384141	0.700874	0.759497
ATP2C2	ENSG00000064270	protein_coding	54.2699	-0.286025	0.141485	-2.02159	0.0432182	0.0766125
NGFR	ENSG00000064300	protein_coding	1996.05	0.445749	0.107738	4.13734	3.51359e-05	0.000143872
CDON	ENSG00000064309	protein_coding	1776.65	-0.104193	0.0923218	-1.12858	0.259074	0.34196
TAF2	ENSG00000064313	protein_coding	1707.44	0.0437771	0.0412602	1.061	0.288689	0.373645
HIPK2	ENSG00000064393	protein_coding	26603.1	0.0225101	0.0711233	0.316494	0.751628	0.802727
TNPO3	ENSG00000064419	protein_coding	3351.36	-0.0242036	0.0340176	-0.711502	0.476773	0.558863
BORCS8-MEF2B	ENSG00000064489	protein_coding	25.844	0.0276632	0.053448	0.517572	0.604757	0.675962
RFXANK	ENSG00000064490	protein_coding	2308.52	-0.327938	0.0507626	-6.46023	1.04541e-10	1.47581e-09
TMEM161A	ENSG00000064545	protein_coding	1661.98	-0.243499	0.0475207	-5.12407	2.99007e-07	1.97118e-06
LPAR2	ENSG00000064547	protein_coding	635.358	-0.39469	0.0741618	-5.32201	1.02626e-07	7.49202e-07
CTSA	ENSG00000064601	protein_coding	13609.4	-0.292631	0.0585865	-4.99486	5.888e-07	3.62358e-06
SUGP2	ENSG00000064607	protein_coding	2481.77	0.201762	0.0460926	4.37732	1.20147e-05	5.48806e-05
SLC12A2	ENSG00000064651	protein_coding	2099.7	0.378906	0.0722287	5.24592	1.55507e-07	1.08793e-06
SNX24	ENSG00000064652	protein_coding	1074.08	-0.233091	0.0503071	-4.63336	3.59773e-06	1.84885e-05
EYA2	ENSG00000064655	protein_coding	215.567	-0.175766	0.118383	-1.48472	0.137617	0.203176
CNN2	ENSG00000064666	protein_coding	4003.54	0.0102861	0.0669435	0.153653	0.877884	0.905223
ABCA7	ENSG00000064687	protein_coding	764.15	-0.137695	0.0810244	-1.69943	0.0892382	0.141771
SNCAIP	ENSG00000064692	protein_coding	126.133	0.315385	0.104692	3.0125	0.00259108	0.00663412
DDX20	ENSG00000064703	protein_coding	971.382	0.0150177	0.0279996	0.536356	0.591713	0.664151
BTBD1	ENSG00000064726	protein_coding	3620.16	0.0501778	0.0441435	1.1367	0.255665	0.338395
FAR2	ENSG00000064763	protein_coding	774.789	-0.0122667	0.060762	-0.201881	0.84001	0.875409
BCAS1	ENSG00000064787	protein_coding	87.7741	-0.852254	0.181638	-4.69205	2.7048e-06	1.43272e-05
POU1F1	ENSG00000064835	protein_coding	3.56537	-0.256391	0.10808	-2.37223	0.0176809	0.0355433
CHI3L2	ENSG00000064886	protein_coding	411.971	-1.19022	0.14324	-8.30929	9.62763e-17	4.85877e-15
SBNO2	ENSG00000064932	protein_coding	3913.01	-0.0797683	0.0536981	-1.4855	0.137412	0.202965
PMS1	ENSG00000064933	protein_coding	740.656	-0.143749	0.0404456	-3.55412	0.000379243	0.00120717
HMG20B	ENSG00000064961	protein_coding	3268.54	-0.213816	0.0426598	-5.01213	5.38317e-07	3.34389e-06
CALCRL	ENSG00000064989	protein_coding	7001.76	0.426692	0.0859616	4.96375	6.91447e-07	4.18614e-06
TAF11	ENSG00000064995	protein_coding	1541.32	0.00513274	0.028091	0.182719	0.855019	0.887768
ANKS1A	ENSG00000064999	protein_coding	3000.84	0.840655	0.0674418	12.4649	1.16022e-35	1.66144e-32
AP3D1	ENSG00000065000	protein_coding	7899.22	0.100494	0.0324039	3.10129	0.00192681	0.0051043
ZNF76	ENSG00000065029	protein_coding	1858.34	-0.00341935	0.0421131	-0.0811945	0.935287	0.950808
SLC9A3R2	ENSG00000065054	protein_coding	6467.18	0.260202	0.0808122	3.21984	0.00128264	0.00356866
NTHL1	ENSG00000065057	protein_coding	493.722	-0.24487	0.060109	-4.07376	4.62602e-05	0.000183742
UHRF1BP1	ENSG00000065060	protein_coding	1563.31	0.195165	0.0503217	3.87836	0.000105164	0.000383162
GNAI3	ENSG00000065135	protein_coding	5515.34	-0.0216143	0.0353148	-0.612047	0.540506	0.617552
IPO5	ENSG00000065150	protein_coding	8571.98	0.126223	0.042307	2.98349	0.00284979	0.00720966
OAT	ENSG00000065154	protein_coding	2893.72	0.175421	0.0551176	3.18266	0.00145929	0.00399728
WDR3	ENSG00000065183	protein_coding	1834.09	0.0939602	0.03897	2.41109	0.0159049	0.0324428
PKN2	ENSG00000065243	protein_coding	3338.04	0.11317	0.0371397	3.04714	0.00231033	0.00599008
WDR18	ENSG00000065268	protein_coding	1738.63	-0.259099	0.0521528	-4.96807	6.76224e-07	4.10373e-06
TRAM2	ENSG00000065308	protein_coding	2630.65	0.20222	0.0674538	2.9979	0.00271847	0.00691639
NTN1	ENSG00000065320	protein_coding	189.411	0.819853	0.112879	7.26312	3.78252e-13	9.17091e-12
GLP2R	ENSG00000065325	protein_coding	91.863	-0.458728	0.216047	-2.12328	0.0337301	0.0620319
MCM10	ENSG00000065328	protein_coding	118.358	0.00427037	0.0781605	0.0546359	0.956429	0.967406
DGKA	ENSG00000065357	protein_coding	1026.72	-0.069595	0.0702391	-0.99083	0.321769	0.408057
ERBB3	ENSG00000065361	protein_coding	12605.3	-0.272789	0.0881274	-3.09539	0.00196551	0.00519421
ROPN1	ENSG00000065371	protein_coding	0.940501	-0.0971348	0.218212	-0.445139	0.656219	0.721342
ANKRD44	ENSG00000065413	protein_coding	1359.32	-0.0345374	0.0607747	-0.568285	0.569842	0.644226
KARS1	ENSG00000065427	protein_coding	7910.74	-0.170871	0.0313544	-5.44966	5.04653e-08	3.95168e-07
ADAT1	ENSG00000065457	protein_coding	1130.37	0.130261	0.0421154	3.09296	0.00198173	0.00523284
PDIA5	ENSG00000065485	protein_coding	4331.67	-0.396507	0.0736022	-5.38716	7.15808e-08	5.43156e-07
TBC1D22B	ENSG00000065491	protein_coding	1360.96	0.0844102	0.0306176	2.75691	0.00583496	0.01355
NDUFB4	ENSG00000065518	protein_coding	5496.82	-0.476908	0.0547201	-8.71541	2.89714e-18	1.9874e-16
SPEN	ENSG00000065526	protein_coding	4975.97	0.377327	0.047415	7.95795	1.74906e-15	6.78081e-14
MYLK	ENSG00000065534	protein_coding	14187.9	0.196901	0.0648807	3.03483	0.00240675	0.00620774
ZC3H15	ENSG00000065548	protein_coding	3197.08	-0.0809957	0.0350171	-2.31303	0.0207209	0.0407867
MAP2K4	ENSG00000065559	protein_coding	2033.97	0.0221959	0.0321138	0.691164	0.489463	0.570527
PACC1	ENSG00000065600	protein_coding	437.194	-0.206827	0.0428534	-4.82637	1.39044e-06	7.88266e-06
SNAP91	ENSG00000065609	protein_coding	9.95651	-1.19493	0.257441	-4.64156	3.45785e-06	1.78432e-05
SLK	ENSG00000065613	protein_coding	5537.3	0.329966	0.046577	7.08431	1.39743e-12	3.01061e-11
CYB5R4	ENSG00000065615	protein_coding	1172.68	-0.107366	0.0477305	-2.24942	0.0244859	0.0470261
COL17A1	ENSG00000065618	protein_coding	96.8583	0.496951	0.161741	3.0725	0.00212272	0.0055609
GSTO2	ENSG00000065621	protein_coding	478.212	0.396554	0.126511	3.13454	0.00172125	0.00462472
SEC61A2	ENSG00000065665	protein_coding	330.024	-0.123647	0.0563976	-2.19241	0.0283502	0.0533717
PRKCQ	ENSG00000065675	protein_coding	487.999	0.213532	0.0859316	2.48491	0.0129583	0.0271576
TLE2	ENSG00000065717	protein_coding	983.675	0.560285	0.0802732	6.97972	2.95766e-12	5.86463e-11
ASB1	ENSG00000065802	protein_coding	1402.69	0.421705	0.0487195	8.65578	4.89568e-18	3.21403e-16
FAM107B	ENSG00000065809	protein_coding	9580.27	-0.345256	0.0509666	-6.77417	1.25121e-11	2.15142e-10
ME1	ENSG00000065833	protein_coding	751.828	-0.0140002	0.0870089	-0.160905	0.872168	0.901033
TBC1D1	ENSG00000065882	protein_coding	7105.79	0.316588	0.0735129	4.30656	1.65815e-05	7.32591e-05
CDK13	ENSG00000065883	protein_coding	3250.75	-0.0217	0.0302965	-0.716254	0.473834	0.555973
MTHFD2	ENSG00000065911	protein_coding	1715.86	-0.139449	0.0749827	-1.85974	0.062922	0.105588
SLC9A7	ENSG00000065923	protein_coding	1384.9	0.143904	0.0668177	2.15368	0.0312656	0.0581129
FOXJ2	ENSG00000065970	protein_coding	2175.42	0.221351	0.0306894	7.21261	5.48903e-13	1.29056e-11
YBX1	ENSG00000065978	protein_coding	18561.8	-0.164522	0.0386481	-4.25693	2.07251e-05	8.95191e-05
PDE4A	ENSG00000065989	protein_coding	1928.05	0.0947357	0.0495843	1.9106	0.0560562	0.0956871
PPP2R5A	ENSG00000066027	protein_coding	3571.52	0.121501	0.0501065	2.42486	0.0153142	0.0314111
CTNNA2	ENSG00000066032	protein_coding	11.3421	-0.0513587	0.243242	-0.211142	0.832776	0.869472
ELAVL1	ENSG00000066044	protein_coding	4079.08	-0.0398907	0.0257362	-1.54999	0.121145	0.182682
TIE1	ENSG00000066056	protein_coding	4727.86	0.386317	0.077482	4.98589	6.1676e-07	3.77689e-06
DIP2B	ENSG00000066084	protein_coding	3079.49	0.187713	0.0411788	4.5585	5.15196e-06	2.55806e-05
SMARCD1	ENSG00000066117	protein_coding	3574.91	-0.0619511	0.0306854	-2.01891	0.0434967	0.0770375
KDM4A	ENSG00000066135	protein_coding	2336.29	0.11307	0.0328049	3.44675	0.000567366	0.00172969
NFYC	ENSG00000066136	protein_coding	2778.24	-0.0555078	0.0258807	-2.14476	0.0319723	0.0592414
ZMYND12	ENSG00000066185	protein_coding	212.142	-0.29218	0.0788673	-3.7047	0.000211637	0.000715725
SLC9A3	ENSG00000066230	protein_coding	807.077	0.287258	0.167706	1.71286	0.0867383	0.138497
NGEF	ENSG00000066248	protein_coding	695.066	-0.473088	0.121633	-3.88946	0.000100468	0.000367836
ASPM	ENSG00000066279	protein_coding	402.341	-0.0248391	0.102408	-0.242551	0.808353	0.849684
CD84	ENSG00000066294	protein_coding	1975.47	-0.108973	0.100339	-1.08605	0.277457	0.361609
ELOVL1	ENSG00000066322	protein_coding	3944.06	-0.132511	0.0335609	-3.94838	7.86821e-05	0.000295948
SPI1	ENSG00000066336	protein_coding	1972.28	-0.406012	0.0764288	-5.31229	1.08257e-07	7.86264e-07
ZNRD1	ENSG00000066379	protein_coding	858.861	-0.348972	0.0423118	-8.24761	1.61588e-16	7.72117e-15
MPPED2	ENSG00000066382	protein_coding	268.762	0.59256	0.122117	4.85239	1.21985e-06	7.00045e-06
CLDN18	ENSG00000066405	protein_coding	43.9179	-0.138348	0.105672	-1.30922	0.19046	0.265916
ZBTB11	ENSG00000066422	protein_coding	1466.71	0.0873242	0.0366629	2.38181	0.0172277	0.0347718
ATXN3	ENSG00000066427	protein_coding	1373.78	0.115936	0.0462366	2.50745	0.0121607	0.025681
GOLGA5	ENSG00000066455	protein_coding	3163.51	-0.00545678	0.0403161	-0.13535	0.892335	0.916977
FGFR2	ENSG00000066468	protein_coding	2074.66	0.172896	0.0870493	1.98618	0.0470128	0.0823326
LRRC40	ENSG00000066557	protein_coding	1241.23	-0.112783	0.0464367	-2.42874	0.0151514	0.0311226
ISOC1	ENSG00000066583	protein_coding	1354.31	-0.140437	0.0523264	-2.68387	0.0072776	0.0164294
EML1	ENSG00000066629	protein_coding	2044.92	0.346838	0.0499783	6.93976	3.92765e-12	7.60052e-11
TRMT11	ENSG00000066651	protein_coding	618.627	-0.127048	0.0397824	-3.19357	0.00140527	0.00386895
THUMPD1	ENSG00000066654	protein_coding	3581.97	0.0100889	0.0314778	0.320507	0.748584	0.800147
MSANTD3	ENSG00000066697	protein_coding	1224.61	-0.124217	0.0446502	-2.78199	0.00540261	0.0126705
KIF26A	ENSG00000066735	protein_coding	757.226	0.455082	0.11072	4.1102	3.95318e-05	0.00015959
ATG2B	ENSG00000066739	protein_coding	2547.08	0.258808	0.0438604	5.90073	3.61897e-09	3.68197e-08
ARFGEF1	ENSG00000066777	protein_coding	3971.92	0.119449	0.0535809	2.22933	0.0257923	0.0491702
ACSM2B	ENSG00000066813	protein_coding	9633.49	-0.368761	0.146928	-2.50981	0.0120796	0.0255298
ZFAT	ENSG00000066827	protein_coding	1252.51	-0.0401903	0.0665979	-0.603477	0.546191	0.622681
MTFR1	ENSG00000066855	protein_coding	2030.53	-0.33042	0.0583245	-5.6652	1.46852e-08	1.30262e-07
STAG3	ENSG00000066923	protein_coding	306.515	-0.204081	0.0813434	-2.50888	0.0121114	0.0255899
FECH	ENSG00000066926	protein_coding	1660.8	0.150578	0.0455086	3.30879	0.000937015	0.00270781
MYO9A	ENSG00000066933	protein_coding	5727.06	0.261887	0.0567311	4.6163	3.90648e-06	1.99011e-05
DDX3Y	ENSG00000067048	protein_coding	2311.3	-0.0726107	0.235492	-0.308337	0.757826	0.80775
PFKP	ENSG00000067057	protein_coding	30242.7	0.0043369	0.0637347	0.0680462	0.945749	0.959023
IDI1	ENSG00000067064	protein_coding	1751.59	0.176349	0.0445704	3.95665	7.60078e-05	0.000286901
SP100	ENSG00000067066	protein_coding	4521.46	-0.149274	0.0309534	-4.82252	1.41753e-06	8.01246e-06
KLF6	ENSG00000067082	protein_coding	25846.8	0.275614	0.0716094	3.84885	0.000118676	0.000426412
PLPP1	ENSG00000067113	protein_coding	9381.95	0.267058	0.0740528	3.60632	0.00031057	0.00100928
NEO1	ENSG00000067141	protein_coding	5466.53	0.203706	0.0496867	4.0998	4.13501e-05	0.00016614
TRAM1	ENSG00000067167	protein_coding	20778.9	-0.386907	0.0573311	-6.74864	1.49233e-11	2.52902e-10
PHKA1	ENSG00000067177	protein_coding	1114.38	0.0854553	0.102139	0.836658	0.402785	0.488234
TNFRSF1A	ENSG00000067182	protein_coding	9987.31	-0.119894	0.0435141	-2.7553	0.0058638	0.0136073
CACNB1	ENSG00000067191	protein_coding	279.788	0.0913782	0.0860457	1.06197	0.288248	0.37315
EVI5	ENSG00000067208	protein_coding	1088.88	0.14981	0.0457884	3.2718	0.00106866	0.00303974
STOML1	ENSG00000067221	protein_coding	1200.18	-0.288557	0.0479292	-6.02049	1.73886e-09	1.90577e-08
PKM	ENSG00000067225	protein_coding	124808	-0.167297	0.046033	-3.63428	0.000278754	0.000916791
DHX29	ENSG00000067248	protein_coding	2181.12	0.0293187	0.041029	0.714584	0.474866	0.55697
DNTTIP2	ENSG00000067334	protein_coding	3073.86	-0.00132262	0.0288793	-0.045798	0.963471	0.972684
METTL22	ENSG00000067365	protein_coding	642.734	-0.129349	0.0459495	-2.81503	0.00487729	0.0115724
TP53BP1	ENSG00000067369	protein_coding	2525.82	0.221977	0.0432502	5.13239	2.8608e-07	1.89423e-06
TRO	ENSG00000067445	protein_coding	681.793	0.448998	0.0978494	4.58866	4.46092e-06	2.24511e-05
RRP15	ENSG00000067533	protein_coding	1157.67	0.0457318	0.0398543	1.14747	0.251186	0.333527
RHOA	ENSG00000067560	protein_coding	23820.2	0.216437	0.0339257	6.37975	1.77383e-10	2.38859e-09
DHX8	ENSG00000067596	protein_coding	2512.48	0.204506	0.0283958	7.20198	5.93433e-13	1.38248e-11
PRKCZ	ENSG00000067606	protein_coding	858.832	0.0221209	0.0549426	0.402619	0.687228	0.747823
ZFY	ENSG00000067646	protein_coding	503.447	-0.24113	0.246075	-0.979906	0.327132	0.413543
IARS2	ENSG00000067704	protein_coding	6538.9	0.0977038	0.0401604	2.43284	0.014981	0.0308175
SYT1	ENSG00000067715	protein_coding	53.8844	0.439597	0.128543	3.41983	0.000626595	0.00189008
NAV3	ENSG00000067798	protein_coding	146.487	0.4204	0.133541	3.1481	0.00164336	0.0044407
IDH3G	ENSG00000067829	protein_coding	3210.81	-0.143527	0.0425222	-3.37534	0.000737245	0.00218649
ROGDI	ENSG00000067836	protein_coding	1379.33	-0.391865	0.0638811	-6.13429	8.55414e-10	1.00149e-08
PDZD4	ENSG00000067840	protein_coding	230.626	0.65671	0.0962052	6.82614	8.72284e-12	1.56567e-10
ATP2B3	ENSG00000067842	protein_coding	8.07887	-0.702336	0.219084	-3.20579	0.00134694	0.00372673
ROCK1	ENSG00000067900	protein_coding	4106.24	0.32711	0.0463339	7.05984	1.6669e-12	3.51332e-11
CBFB	ENSG00000067955	protein_coding	2882.32	-0.133173	0.0369856	-3.60066	0.000317413	0.00102945
PDK3	ENSG00000067992	protein_coding	587.749	-0.155647	0.0517174	-3.00956	0.00261623	0.00669121
HYAL2	ENSG00000068001	protein_coding	5557.42	0.175787	0.0626556	2.80561	0.00502214	0.0118828
HDAC4	ENSG00000068024	protein_coding	876.179	0.292689	0.0451101	6.48832	8.67986e-11	1.24842e-09
RASSF1	ENSG00000068028	protein_coding	1348.01	0.107824	0.0413539	2.60734	0.00912489	0.0199856
FGFR3	ENSG00000068078	protein_coding	1845.42	0.318667	0.0991694	3.21336	0.0013119	0.00364188
IFI35	ENSG00000068079	protein_coding	2406.03	-0.38655	0.0520233	-7.43034	1.08319e-13	2.91464e-12
HEATR6	ENSG00000068097	protein_coding	1027.11	0.121073	0.032026	3.78046	0.000156541	0.000546165
COASY	ENSG00000068120	protein_coding	3543.52	-0.12025	0.0396476	-3.03297	0.00242162	0.00624153
PLEKHH3	ENSG00000068137	protein_coding	1391.1	0.15108	0.0566074	2.66891	0.00760982	0.017082
MEF2A	ENSG00000068305	protein_coding	5835.77	0.284289	0.0419985	6.76902	1.29661e-11	2.22364e-10
OTUD5	ENSG00000068308	protein_coding	4055.48	0.0516805	0.0319854	1.61575	0.106148	0.163892
TFE3	ENSG00000068323	protein_coding	4128.37	0.0899597	0.0371847	2.41927	0.0155518	0.0318275
TBC1D25	ENSG00000068354	protein_coding	1268	0.136405	0.0300726	4.53586	5.73695e-06	2.81618e-05
ACSL4	ENSG00000068366	protein_coding	4844.31	0.0484223	0.0592776	0.816873	0.414001	0.498966
INPP5A	ENSG00000068383	protein_coding	1463.88	0.386824	0.0396862	9.74707	1.89875e-22	3.01067e-20
GPKOW	ENSG00000068394	protein_coding	1207.73	0.0394187	0.0303293	1.29969	0.193707	0.269618
GRIPAP1	ENSG00000068400	protein_coding	2891.12	0.067134	0.0383594	1.75013	0.0800955	0.129459
FTSJ1	ENSG00000068438	protein_coding	1467.63	0.0276396	0.0462571	0.597521	0.550159	0.626385
PRR11	ENSG00000068489	protein_coding	372.676	0.0127173	0.0896455	0.141862	0.887189	0.912642
REEP1	ENSG00000068615	protein_coding	241.01	-0.0162898	0.103372	-0.157585	0.874784	0.903023
ATP11A	ENSG00000068650	protein_coding	17606.6	0.489142	0.0795454	6.14922	7.78664e-10	9.20813e-09
POLR1A	ENSG00000068654	protein_coding	2421.39	0.116242	0.0370335	3.13884	0.00169617	0.00456456
LAPTM4A	ENSG00000068697	protein_coding	25407.3	-0.151118	0.0412132	-3.66673	0.000245668	0.000818904
TTC7A	ENSG00000068724	protein_coding	2683.9	-0.132775	0.0488737	-2.71669	0.00659389	0.0150748
IP6K2	ENSG00000068745	protein_coding	2547.67	0.0125898	0.0418874	0.300562	0.763749	0.812774
STON1-GTF2A1L	ENSG00000068781	protein_coding	16.2409	-0.574364	0.158929	-3.61397	0.000301539	0.000982698
SRBD1	ENSG00000068784	protein_coding	1136.06	0.0171766	0.0371798	0.461986	0.644091	0.71067
KIF2A	ENSG00000068796	protein_coding	1691.44	-0.418475	0.0887985	-4.71264	2.44532e-06	1.30813e-05
RASGRP2	ENSG00000068831	protein_coding	654.431	0.260821	0.0743923	3.50602	0.000454868	0.00142027
PSME4	ENSG00000068878	protein_coding	2892.86	0.0300828	0.0413029	0.728347	0.466401	0.549164
IFT80	ENSG00000068885	protein_coding	1027.75	-0.14954	0.0478172	-3.12732	0.00176405	0.00472227
SIRT2	ENSG00000068903	protein_coding	3887.31	-0.161807	0.032734	-4.94309	7.68954e-07	4.61367e-06
ERLEC1	ENSG00000068912	protein_coding	4194.47	-0.108655	0.0390721	-2.78089	0.00542101	0.0127085
PPP2R5B	ENSG00000068971	protein_coding	1473.26	-0.09063	0.0441522	-2.05267	0.0401042	0.071853
PYGM	ENSG00000068976	protein_coding	296.583	0.259581	0.0892241	2.90932	0.00362216	0.00890844
PAGE1	ENSG00000068985	protein_coding	0.672242	0.703849	0.446927	1.57486	0.115288	0.175526
PITX1	ENSG00000069011	protein_coding	92.2516	-1.035	0.24879	-4.16015	3.18035e-05	0.000131472
TRPC7	ENSG00000069018	protein_coding	19.036	-0.570699	0.146982	-3.88278	0.00010327	0.000377163
MAST4	ENSG00000069020	protein_coding	3989.39	0.0381631	0.0630225	0.605547	0.544816	0.621361
ADGRF5	ENSG00000069122	protein_coding	13529.7	0.759446	0.0850066	8.93396	4.11009e-19	3.32171e-17
SDK2	ENSG00000069188	protein_coding	158.58	-0.157063	0.134183	-1.17051	0.241795	0.323307
ADAM7	ENSG00000069206	protein_coding	17.6304	-2.87956	0.235628	-12.2208	2.40784e-34	2.56597e-31
NUP133	ENSG00000069248	protein_coding	2488.29	0.189279	0.0345139	5.48413	4.15506e-08	3.31999e-07
NUCKS1	ENSG00000069275	protein_coding	18979.3	0.0763711	0.0355879	2.14598	0.0318743	0.0590956
VPS35	ENSG00000069329	protein_coding	8321.71	0.00842831	0.0364901	0.230975	0.817334	0.856922
DNAJA2	ENSG00000069345	protein_coding	5063.14	-0.0836244	0.0338252	-2.47225	0.0134267	0.0279914
BCL3	ENSG00000069399	protein_coding	2556.31	-0.403607	0.0799066	-5.05098	4.39544e-07	2.79009e-06
KCNAB2	ENSG00000069424	protein_coding	2058.33	-0.0338526	0.0813702	-0.416032	0.677387	0.739449
ABCC9	ENSG00000069431	protein_coding	1842.04	0.240582	0.083751	2.87259	0.00407123	0.0098637
GAL	ENSG00000069482	protein_coding	4.07412	-0.145648	0.204057	-0.713761	0.475375	0.557481
CLEC2D	ENSG00000069493	protein_coding	946.824	-0.504859	0.083676	-6.0335	1.60443e-09	1.77246e-08
FUNDC1	ENSG00000069509	protein_coding	948.473	-0.203057	0.039606	-5.12693	2.94498e-07	1.9437e-06
MAOB	ENSG00000069535	protein_coding	13297.1	-0.195959	0.0868353	-2.25667	0.0240286	0.0462692
RORA	ENSG00000069667	protein_coding	3295.56	0.109244	0.0580632	1.88148	0.0599071	0.101209
DRD4	ENSG00000069696	protein_coding	54.7905	-0.521414	0.100947	-5.16524	2.40132e-07	1.61346e-06
TGFBR3	ENSG00000069702	protein_coding	2621.02	0.293793	0.0636241	4.61764	3.88131e-06	1.97905e-05
PLA2G10	ENSG00000069764	protein_coding	7.87354	0.184777	0.097606	1.89309	0.0583457	0.0989811
HES2	ENSG00000069812	protein_coding	119.888	-0.337281	0.117116	-2.87989	0.00397814	0.00966667
ATP1B3	ENSG00000069849	protein_coding	4435.52	-0.0297937	0.0410256	-0.726222	0.467702	0.550413
NEDD4	ENSG00000069869	protein_coding	2148.42	0.0753857	0.0623243	1.20957	0.226443	0.306338
PIGB	ENSG00000069943	protein_coding	787.596	-0.172556	0.0363999	-4.74056	2.13126e-06	1.15619e-05
MAPK6	ENSG00000069956	protein_coding	2459.56	-0.0960076	0.0438052	-2.19169	0.0284017	0.0534555
GNB5	ENSG00000069966	protein_coding	1955.16	0.0888545	0.0384606	2.31027	0.020873	0.0410402
RAB27A	ENSG00000069974	protein_coding	1668.97	0.0744765	0.051358	1.45014	0.147018	0.214683
HDHD5	ENSG00000069998	protein_coding	1997.96	-0.0808369	0.0400957	-2.0161	0.0437895	0.0774873
UFD1	ENSG00000070010	protein_coding	2751.21	-0.211392	0.0356931	-5.92248	3.17113e-09	3.26695e-08
LRP6	ENSG00000070018	protein_coding	2672.68	0.475557	0.0543596	8.74837	2.16462e-18	1.50976e-16
GUCY2C	ENSG00000070019	protein_coding	85.3085	-0.133908	0.0844014	-1.58656	0.112613	0.172202
SCT	ENSG00000070031	protein_coding	4.47466	-0.212598	0.131147	-1.62107	0.105003	0.162392
PHRF1	ENSG00000070047	protein_coding	2922.69	-0.00335994	0.0371806	-0.0903682	0.927995	0.944777
ELP1	ENSG00000070061	protein_coding	2286.79	0.213359	0.035808	5.95843	2.54678e-09	2.68654e-08
NUCB2	ENSG00000070081	protein_coding	4594.11	-0.435494	0.048037	-9.06581	1.23684e-19	1.13127e-17
PFN2	ENSG00000070087	protein_coding	4728.41	0.216564	0.103848	2.08539	0.0370335	0.067145
PTPN3	ENSG00000070159	protein_coding	3217.31	0.381349	0.0790093	4.82663	1.38862e-06	7.87429e-06
SPTB	ENSG00000070182	protein_coding	121.903	0.349687	0.104342	3.35134	0.000804219	0.00236327
DAPP1	ENSG00000070190	protein_coding	280.827	-0.149791	0.0886252	-1.69017	0.0909962	0.144139
FGF10	ENSG00000070193	protein_coding	5.41836	0.638124	0.241053	2.64723	0.0081153	0.018068
SLC44A1	ENSG00000070214	protein_coding	5251.82	0.165969	0.0495189	3.35163	0.000803361	0.00236103
TMEM260	ENSG00000070269	protein_coding	1154.2	0.0591286	0.036757	1.60863	0.107696	0.16581
SMG6	ENSG00000070366	protein_coding	1529.32	0.508235	0.0479198	10.606	2.79564e-26	8.15971e-24
EXOC5	ENSG00000070367	protein_coding	3584.89	0.0632675	0.04843	1.30637	0.191427	0.266957
CLTCL1	ENSG00000070371	protein_coding	550.7	0.117161	0.0642439	1.8237	0.0681978	0.112987
FGF22	ENSG00000070388	protein_coding	4.90551	-0.209317	0.126925	-1.64914	0.0991183	0.154742
FSTL3	ENSG00000070404	protein_coding	6383.63	-0.221328	0.104898	-2.10993	0.0348642	0.0638102
DGCR2	ENSG00000070413	protein_coding	8167.76	0.108605	0.0379208	2.86398	0.00418351	0.0100945
RNF126	ENSG00000070423	protein_coding	1554.83	-0.357155	0.0480849	-7.4276	1.1059e-13	2.96732e-12
MNT	ENSG00000070444	protein_coding	1377.97	0.127542	0.0378267	3.37174	0.000746942	0.00221325
ZXDC	ENSG00000070476	protein_coding	1780.53	0.0992438	0.0369893	2.68304	0.00729558	0.0164637
JMJD6	ENSG00000070495	protein_coding	1609.82	-0.0381672	0.050993	-0.748479	0.454171	0.537378
POLB	ENSG00000070501	protein_coding	660.884	-0.270238	0.0362431	-7.45627	8.9006e-14	2.43209e-12
ST6GALNAC1	ENSG00000070526	protein_coding	20.7683	-0.0304258	0.109868	-0.276931	0.781833	0.827397
WIPI1	ENSG00000070540	protein_coding	1469.72	0.0670626	0.0438548	1.5292	0.126216	0.188992
FRMPD1	ENSG00000070601	protein_coding	64.2056	-0.0398381	0.127986	-0.311269	0.755596	0.806026
GBA2	ENSG00000070610	protein_coding	4501.5	0.123523	0.0492962	2.50572	0.0122201	0.0257816
NDST1	ENSG00000070614	protein_coding	9472.54	0.488081	0.0533537	9.14802	5.79891e-20	5.8274e-18
ASNS	ENSG00000070669	protein_coding	1423.56	-0.325588	0.0718881	-4.52909	5.92385e-06	2.89821e-05
AP3M2	ENSG00000070718	protein_coding	1508.55	0.087707	0.032784	2.6753	0.00746629	0.0168061
CNGB1	ENSG00000070729	protein_coding	12.8145	-1.37326	0.202713	-6.77443	1.24894e-11	2.14832e-10
ST6GALNAC2	ENSG00000070731	protein_coding	368.471	-0.0578509	0.115548	-0.500667	0.616605	0.686575
CHAT	ENSG00000070748	protein_coding	7.4924	-0.789227	0.38046	-2.0744	0.0380419	0.0687016
PABPC1	ENSG00000070756	protein_coding	42119.7	-0.086647	0.0428895	-2.02024	0.0433589	0.0768321
TESK2	ENSG00000070759	protein_coding	257.953	0.351769	0.046805	7.51562	5.66427e-14	1.59532e-12
CFAP20	ENSG00000070761	protein_coding	1455.35	-0.0346761	0.0321349	-1.07908	0.280552	0.364886
CSNK2A2	ENSG00000070770	protein_coding	4552.83	-0.0597715	0.0318459	-1.8769	0.0605324	0.102096
PTPN21	ENSG00000070778	protein_coding	1240.53	0.451541	0.0569118	7.93404	2.12133e-15	8.09392e-14
EIF2B3	ENSG00000070785	protein_coding	959.122	-0.0773427	0.0328544	-2.3541	0.0185675	0.0370848
CAMK2A	ENSG00000070808	protein_coding	16.9008	0.721403	0.136681	5.27801	1.30597e-07	9.30132e-07
TCOF1	ENSG00000070814	protein_coding	2720.18	-0.17167	0.0515106	-3.33272	0.000860021	0.00250937
CDC42	ENSG00000070831	protein_coding	13086	-0.0377292	0.0320394	-1.17759	0.23896	0.320169
OSBPL3	ENSG00000070882	protein_coding	2465.84	-0.233761	0.0634159	-3.68616	0.000227667	0.000765249
EPHA8	ENSG00000070886	protein_coding	4.03533	-0.45727	0.193788	-2.35964	0.0182929	0.036605
SLC12A3	ENSG00000070915	protein_coding	156.934	2.34284	0.190127	12.3225	6.85373e-35	8.05296e-32
RAD18	ENSG00000070950	protein_coding	458.224	0.10611	0.0386362	2.7464	0.00602532	0.0139306
ATP2B1	ENSG00000070961	protein_coding	2704.4	0.191253	0.0544073	3.51522	0.000439391	0.00137682
TRPM5	ENSG00000070985	protein_coding	5.08174	0.0508173	0.170995	0.297185	0.766325	0.814878
NCK2	ENSG00000071051	protein_coding	4229.72	-0.0736092	0.0467552	-1.57435	0.115406	0.175672
MAP4K4	ENSG00000071054	protein_coding	9097.91	0.298479	0.0471207	6.33434	2.38359e-10	3.12251e-09
MGAT4A	ENSG00000071073	protein_coding	4966.18	0.087296	0.0545299	1.60088	0.109403	0.168005
RPL31	ENSG00000071082	protein_coding	37442.1	-0.322302	0.0508906	-6.33324	2.40067e-10	3.1431e-09
WDR1	ENSG00000071127	protein_coding	16735.1	0.130126	0.0374159	3.47782	0.000505507	0.00155989
SNX13	ENSG00000071189	protein_coding	3542.93	-0.0292608	0.0621781	-0.470597	0.637928	0.705314
MS4A12	ENSG00000071203	protein_coding	0.719948	-0.703097	0.337824	-2.08125	0.0374106	0.067751
ARHGAP10	ENSG00000071205	protein_coding	1282.6	0.0160774	0.0484192	0.332046	0.739854	0.792721
RPS6KA2	ENSG00000071242	protein_coding	4207.16	0.557168	0.0651637	8.55027	1.22799e-17	7.43346e-16
ING3	ENSG00000071243	protein_coding	1056.84	0.0710487	0.0447279	1.58847	0.112181	0.171662
VASH1	ENSG00000071246	protein_coding	3325.76	0.582923	0.0637382	9.14559	5.93072e-20	5.94681e-18
LMCD1	ENSG00000071282	protein_coding	1758.44	0.0468433	0.0634875	0.737835	0.460615	0.54365
BUD23	ENSG00000071462	protein_coding	3435.48	-0.323309	0.0422016	-7.66107	1.84392e-14	5.79931e-13
SEL1L	ENSG00000071537	protein_coding	9616.96	0.0698498	0.0512933	1.36177	0.17327	0.246138
TRIP13	ENSG00000071539	protein_coding	321.004	-0.202431	0.0792811	-2.55334	0.0106696	0.0229586
ATP6AP1	ENSG00000071553	protein_coding	11163.7	0.00950853	0.0426681	0.222849	0.823653	0.862223
TCF3	ENSG00000071564	protein_coding	2460.26	0.0875407	0.040467	2.16326	0.0305212	0.0569023
TRIB2	ENSG00000071575	protein_coding	5758.58	0.422692	0.0717023	5.89509	3.74469e-09	3.7922e-08
DAZAP1	ENSG00000071626	protein_coding	4275.92	-0.0556384	0.0315643	-1.7627	0.0779513	0.126569
MBD3	ENSG00000071655	protein_coding	3318.05	-0.215605	0.0501132	-4.30236	1.68989e-05	7.44735e-05
PRLH	ENSG00000071677	protein_coding	0.113373	-0.323845	0.613854	-0.527561	0.597804
HLTF	ENSG00000071794	protein_coding	2241.7	0.093433	0.0522896	1.78684	0.073964	0.121121
FAM50A	ENSG00000071859	protein_coding	3879	-0.330495	0.0570773	-5.7903	7.0259e-09	6.70368e-08
FAM3A	ENSG00000071889	protein_coding	2729.23	-0.254634	0.0527174	-4.83017	1.36418e-06	7.7472e-06
CPSF1	ENSG00000071894	protein_coding	3492.94	-0.0475048	0.0504796	-0.941069	0.346669	0.433114
MYO3B	ENSG00000071909	protein_coding	157.672	0.783522	0.180311	4.34539	1.39029e-05	6.25638e-05
CYBRD1	ENSG00000071967	protein_coding	4925.62	0.338843	0.076814	4.41121	1.02795e-05	4.75854e-05
CDH19	ENSG00000071991	protein_coding	11.67	-0.101447	0.271433	-0.373747	0.708593	0.765923
PDCD2	ENSG00000071994	protein_coding	2124.12	-0.160962	0.0342038	-4.70596	2.52677e-06	1.34683e-05
SLC6A15	ENSG00000072041	protein_coding	20.3984	1.31605	0.296898	4.43265	9.30827e-06	4.35781e-05
RDH11	ENSG00000072042	protein_coding	5510.02	-0.0314846	0.0701229	-0.448992	0.653437	0.718784
PRKACA	ENSG00000072062	protein_coding	4874.43	0.00420984	0.0337352	0.12479	0.900689	0.92371
ADGRL1	ENSG00000072071	protein_coding	1156.53	0.425061	0.0767887	5.53546	3.10409e-08	2.54905e-07
SPP2	ENSG00000072080	protein_coding	0.488599	-0.78347	0.309016	-2.53537	0.0112329	0.0239915
ACTN1	ENSG00000072110	protein_coding	11283	0.0345553	0.0649349	0.532153	0.59462	0.666696
ZFYVE26	ENSG00000072121	protein_coding	2300.58	0.300935	0.0383016	7.857	3.93442e-15	1.43887e-13
RPS6KA6	ENSG00000072133	protein_coding	308.77	0.616875	0.154491	3.99294	6.52588e-05	0.00025037
EPN2	ENSG00000072134	protein_coding	1682.59	0.362601	0.0362784	9.99494	1.60382e-23	3.10099e-21
PTPN18	ENSG00000072135	protein_coding	5332.31	-0.153064	0.0397321	-3.8524	0.000116964	0.000420936
LIMS2	ENSG00000072163	protein_coding	2589.28	0.361049	0.0767915	4.70168	2.58031e-06	1.37265e-05
ASIC4	ENSG00000072182	protein_coding	7.79281	0.0921614	0.138067	0.667513	0.504444	0.584511
SPEG	ENSG00000072195	protein_coding	222.876	0.0803043	0.125878	0.637954	0.523504	0.601983
LNX1	ENSG00000072201	protein_coding	801.997	0.39544	0.0812591	4.86641	1.13645e-06	6.56043e-06
ALDH3A2	ENSG00000072210	protein_coding	8931.54	0.0774378	0.0695647	1.11318	0.265632	0.348955
TFRC	ENSG00000072274	protein_coding	4993.18	0.173853	0.0774411	2.24497	0.0247699	0.0475058
SREBF1	ENSG00000072310	protein_coding	6015.86	-0.0559485	0.069413	-0.806023	0.42023	0.505012
TRPC5	ENSG00000072315	protein_coding	3.17623	-0.43	0.159511	-2.69573	0.00702342	0.0159398
AFF4	ENSG00000072364	protein_coding	9620.26	0.176064	0.053356	3.2998	0.000967532	0.00278581
UBE2D1	ENSG00000072401	protein_coding	1068.43	-0.200841	0.0505088	-3.97636	6.99776e-05	0.000266599
MPP5	ENSG00000072415	protein_coding	2357.51	0.229617	0.0573285	4.00529	6.19422e-05	0.000238725
RHOBTB1	ENSG00000072422	protein_coding	4691.58	-0.140471	0.0702613	-1.99927	0.0455789	0.08022
SMC1A	ENSG00000072501	protein_coding	5283.28	0.294112	0.0429225	6.85217	7.27367e-12	1.32792e-10
HSD17B10	ENSG00000072506	protein_coding	2900.3	-0.310847	0.0516444	-6.019	1.75503e-09	1.92214e-08
MARK2	ENSG00000072518	protein_coding	2545.62	0.0856288	0.0284721	3.00746	0.00263439	0.00673162
HMMR	ENSG00000072571	protein_coding	240.009	-0.113055	0.0971056	-1.16425	0.244322	0.326052
CHFR	ENSG00000072609	protein_coding	1393.09	-0.156316	0.0449222	-3.4797	0.000501969	0.00155039
TRHDE	ENSG00000072657	protein_coding	1283.89	0.142646	0.139056	1.02581	0.30498	0.390429
P4HA2	ENSG00000072682	protein_coding	6936.33	-0.291839	0.0671669	-4.34498	1.3929e-05	6.26626e-05
FCGR2B	ENSG00000072694	protein_coding	627.489	-0.516579	0.100539	-5.1381	2.77534e-07	1.84155e-06
NFATC3	ENSG00000072736	protein_coding	1601.79	0.152276	0.0471531	3.22939	0.00124055	0.00346289
TRNT1	ENSG00000072756	protein_coding	666.399	0.0603361	0.04862	1.24097	0.214616	0.292975
ACADVL	ENSG00000072778	protein_coding	24483.1	-0.310349	0.0528552	-5.8717	4.31357e-09	4.31018e-08
STK10	ENSG00000072786	protein_coding	3381.35	0.185453	0.0443148	4.1849	2.8529e-05	0.000119237
FBXW11	ENSG00000072803	protein_coding	3872.06	0.182812	0.0427114	4.28017	1.86746e-05	8.14919e-05
ACAP1	ENSG00000072818	protein_coding	989.202	-0.466868	0.0805226	-5.79797	6.71209e-09	6.44136e-08
CRMP1	ENSG00000072832	protein_coding	1981.1	0.14189	0.0675828	2.09949	0.0357734	0.0651854
EVC	ENSG00000072840	protein_coding	3946.96	0.570153	0.0799004	7.13579	9.62317e-13	2.1469e-11
DERL2	ENSG00000072849	protein_coding	2640.67	-0.346586	0.0321996	-10.7636	5.11054e-27	1.68479e-24
SIDT1	ENSG00000072858	protein_coding	221.363	-0.0574197	0.0701776	-0.818206	0.41324	0.498275
NDE1	ENSG00000072864	protein_coding	1042.46	0.106135	0.0376867	2.81625	0.00485873	0.0115325
IRAG1	ENSG00000072952	protein_coding	2670.83	0.388573	0.0748973	5.18808	2.12479e-07	1.44546e-06
TMEM38A	ENSG00000072954	protein_coding	336.451	0.577291	0.100273	5.75718	8.5531e-09	7.99383e-08
AP1M1	ENSG00000072958	protein_coding	4209.54	-0.271577	0.0388497	-6.99044	2.74034e-12	5.46922e-11
PVR	ENSG00000073008	protein_coding	2607.07	-0.0243512	0.0580088	-0.419784	0.674643	0.737068
XRCC1	ENSG00000073050	protein_coding	2055.6	-0.00343686	0.0344855	-0.0996611	0.920613	0.938848
SCARB1	ENSG00000073060	protein_coding	15315.5	-0.222317	0.0927465	-2.39704	0.0165282	0.0335425
CYP2W1	ENSG00000073067	protein_coding	14.981	0.458675	0.161541	2.83937	0.00452021	0.0108147
MCM2	ENSG00000073111	protein_coding	1354.58	0.11138	0.0626965	1.77649	0.0756518	0.123435
MOV10L1	ENSG00000073146	protein_coding	46.3156	0.302486	0.105808	2.85881	0.0042523	0.0102449
PANX2	ENSG00000073150	protein_coding	109.301	-1.16382	0.184349	-6.31314	2.73427e-10	3.53343e-09
SELENOO	ENSG00000073169	protein_coding	1211.16	-0.135863	0.054268	-2.50356	0.0122951	0.0259199
TP63	ENSG00000073282	protein_coding	48.2666	0.0585244	0.10287	0.568915	0.569414	0.643965
ALPK1	ENSG00000073331	protein_coding	1507.43	-0.218057	0.0422074	-5.16632	2.38746e-07	1.6058e-06
LLGL2	ENSG00000073350	protein_coding	2569.16	0.0322147	0.0678667	0.474677	0.635017	0.702808
PDE8A	ENSG00000073417	protein_coding	3436.67	0.0201362	0.0383168	0.525518	0.599223	0.67102
CLCN4	ENSG00000073464	protein_coding	1294.45	0.101895	0.0652332	1.562	0.118287	0.179233
NLE1	ENSG00000073536	protein_coding	1143.69	0.0193657	0.0445613	0.434587	0.663863	0.727963
SDHA	ENSG00000073578	protein_coding	12589.4	-0.00277538	0.0606926	-0.0457284	0.963527	0.972718
SMARCE1	ENSG00000073584	protein_coding	3908.23	-0.0260423	0.0269443	-0.966522	0.333783	0.420303
FNDC8	ENSG00000073598	protein_coding	3.64357	0.146374	0.0970494	1.50824	0.131494	0.195546
GSDMB	ENSG00000073605	protein_coding	443.231	-0.43087	0.111228	-3.87374	0.000107177	0.000389844
KDM5A	ENSG00000073614	protein_coding	3583.96	0.180293	0.0428707	4.20551	2.60497e-05	0.000109958
ADAM11	ENSG00000073670	protein_coding	63.7991	-0.260052	0.103284	-2.51783	0.0118081	0.0250529
PPP2R3A	ENSG00000073711	protein_coding	4449.84	-0.107782	0.0706095	-1.52645	0.126897	0.18982
FERMT2	ENSG00000073712	protein_coding	4154.89	0.334048	0.0506223	6.59883	4.14421e-11	6.38333e-10
ABCB11	ENSG00000073734	protein_coding	2.29774	-0.128726	0.189945	-0.6777	0.497962	0.578565
DHRS9	ENSG00000073737	protein_coding	117.477	-0.225381	0.11314	-1.99206	0.0463648	0.0813813
CD5L	ENSG00000073754	protein_coding	163.72	-0.238357	0.215874	-1.10415	0.269529	0.353175
PTGS2	ENSG00000073756	protein_coding	615.733	0.156646	0.140797	1.11257	0.265894	0.349201
IGF2BP2	ENSG00000073792	protein_coding	396.57	0.389153	0.16708	2.32914	0.0198517	0.0393071
MAP3K13	ENSG00000073803	protein_coding	2948.65	-0.0806314	0.0378642	-2.12949	0.0332139	0.0611954
ST6GAL1	ENSG00000073849	protein_coding	7161.15	0.128141	0.0893634	1.43393	0.151592	0.220253
TBX21	ENSG00000073861	protein_coding	150.19	-0.239143	0.0808462	-2.958	0.00309646	0.00776046
FRY	ENSG00000073910	protein_coding	2479.98	0.592021	0.0652922	9.06727	1.22041e-19	1.11848e-17
PICALM	ENSG00000073921	protein_coding	17661.9	0.0369448	0.0403143	0.916419	0.359447	0.445556
NSF	ENSG00000073969	protein_coding	2131.84	-0.0286704	0.0390776	-0.733679	0.463144	0.546031
GLI2	ENSG00000074047	protein_coding	265.382	0.459126	0.0955283	4.80618	1.53842e-06	8.62446e-06
CLASP1	ENSG00000074054	protein_coding	4784.02	0.115813	0.0306191	3.78239	0.000155332	0.000542278
MRPS34	ENSG00000074071	protein_coding	3098.35	-0.446153	0.0574133	-7.77089	7.79378e-15	2.65634e-13
NOTCH3	ENSG00000074181	protein_coding	19661.3	0.395113	0.0835238	4.73054	2.23923e-06	1.20946e-05
CLNS1A	ENSG00000074201	protein_coding	3252.37	-0.19964	0.030961	-6.4481	1.13259e-10	1.58909e-09
PPP2R2C	ENSG00000074211	protein_coding	194.276	-0.866719	0.203215	-4.26503	1.99877e-05	8.66278e-05
TEAD2	ENSG00000074219	protein_coding	1288.68	0.241674	0.0629007	3.84215	0.000121962	0.000436964
EED	ENSG00000074266	protein_coding	818.03	-0.191021	0.0317861	-6.00956	1.86024e-09	2.02623e-08
CDHR2	ENSG00000074276	protein_coding	1555.6	-0.0632938	0.163058	-0.388168	0.697892	0.757035
SNCB	ENSG00000074317	protein_coding	5.36092	0.946257	0.215626	4.38842	1.14178e-05	5.23524e-05
TSG101	ENSG00000074319	protein_coding	3762.24	-0.103377	0.0385328	-2.68283	0.00730014	0.0164725
NCBP3	ENSG00000074356	protein_coding	2985.56	0.162229	0.0376365	4.31043	1.62937e-05	7.21535e-05
ATP2A3	ENSG00000074370	protein_coding	2601.63	0.127594	0.0704781	1.8104	0.0702333	0.115869
CA12	ENSG00000074410	protein_coding	45277	-0.203365	0.0904794	-2.24763	0.0245996	0.0472226
MGLL	ENSG00000074416	protein_coding	18539.1	-0.166936	0.0544609	-3.06525	0.00217487	0.00567806
NTN4	ENSG00000074527	protein_coding	6703.91	0.23663	0.0870674	2.71778	0.00657221	0.0150342
BCS1L	ENSG00000074582	protein_coding	1223.58	-0.245042	0.0422531	-5.79939	6.6556e-09	6.38848e-08
NUAK1	ENSG00000074590	protein_coding	1733.08	0.609823	0.0616016	9.89946	4.18534e-23	7.35255e-21
DPP8	ENSG00000074603	protein_coding	2861.21	0.135594	0.0373743	3.62801	0.000285618	0.000936541
SLC24A1	ENSG00000074621	protein_coding	924.452	0.266725	0.0437037	6.10303	1.04079e-09	1.19712e-08
ZNF532	ENSG00000074657	protein_coding	4149	0.265911	0.0527861	5.03753	4.71581e-07	2.97491e-06
SCARF1	ENSG00000074660	protein_coding	1945.33	0.390031	0.0627694	6.21371	5.17494e-10	6.35755e-09
LMAN1	ENSG00000074695	protein_coding	15582.8	-0.082983	0.0496891	-1.67004	0.0949107	0.149287
HACD3	ENSG00000074696	protein_coding	4916.28	0.228062	0.064751	3.52214	0.000428077	0.00134533
IPCEF1	ENSG00000074706	protein_coding	397.994	0.298635	0.0815589	3.66159	0.000250658	0.00083384
ZZEF1	ENSG00000074755	protein_coding	3427.63	0.28331	0.0364305	7.77673	7.4421e-15	2.54878e-13
NOX3	ENSG00000074771	protein_coding	0.469185	-0.611803	0.306414	-1.99666	0.0458623	0.0806538
ENO1	ENSG00000074800	protein_coding	157218	-0.133627	0.0592243	-2.25629	0.0240525	0.0462965
SLC12A1	ENSG00000074803	protein_coding	490.472	2.27369	0.220625	10.3056	6.64463e-25	1.57764e-22
MYDGF	ENSG00000074842	protein_coding	5239.19	-0.499218	0.0515003	-9.69349	3.21344e-22	4.92484e-20
ANO8	ENSG00000074855	protein_coding	682.098	0.102419	0.0582245	1.75904	0.0785713	0.127423
TUBE1	ENSG00000074935	protein_coding	852.184	-0.0906513	0.0551346	-1.64418	0.100139	0.156101
ARHGEF10L	ENSG00000074964	protein_coding	3612.79	-0.0284923	0.0546993	-0.520891	0.602443	0.673917
TXK	ENSG00000074966	protein_coding	157.841	-0.2387	0.0887282	-2.69023	0.00714021	0.0161641
WSCD2	ENSG00000075035	protein_coding	37.6324	0.337999	0.157379	2.14767	0.0317397	0.0588747
KCNQ2	ENSG00000075043	protein_coding	2.5495	0.106387	0.188156	0.565421	0.571788	0.645916
TACR2	ENSG00000075073	protein_coding	40.9508	-0.0131098	0.0746951	-0.175511	0.860678	0.892028
ACTR6	ENSG00000075089	protein_coding	1227.57	-0.0719133	0.0363286	-1.97952	0.0477574	0.0834708
TIPIN	ENSG00000075131	protein_coding	282.803	-0.0723798	0.0361034	-2.00479	0.0449851	0.0793333
SRI	ENSG00000075142	protein_coding	5141.44	-0.231684	0.0490763	-4.72089	2.34814e-06	1.261e-05
EIF4G3	ENSG00000075151	protein_coding	4132.06	0.176433	0.0326187	5.40896	6.33911e-08	4.86653e-07
NUP37	ENSG00000075188	protein_coding	777.699	-0.0993917	0.0389469	-2.55198	0.0107113	0.0230362
SEMA3A	ENSG00000075213	protein_coding	174.439	0.067671	0.127558	0.530512	0.595757	0.667661
GTSE1	ENSG00000075218	protein_coding	215.197	0.0457893	0.0914937	0.500464	0.616749	0.686718
SEMA3C	ENSG00000075223	protein_coding	2917.02	0.0962809	0.149762	0.642892	0.520294	0.598984
TTC38	ENSG00000075234	protein_coding	4069.39	-0.234711	0.0589889	-3.9789	6.92334e-05	0.000264027
ACAT1	ENSG00000075239	protein_coding	9387.72	0.0784978	0.0975092	0.80503	0.420802	0.505581
GRAMD4	ENSG00000075240	protein_coding	5242.63	-0.194434	0.0828736	-2.34615	0.0189687	0.0377841
CELSR1	ENSG00000075275	protein_coding	6467.38	0.180502	0.0701748	2.57218	0.0101062	0.0218734
WNT8B	ENSG00000075290	protein_coding	5.25883	0.282245	0.12407	2.27487	0.0229135	0.0444251
ZNF638	ENSG00000075292	protein_coding	5752.52	-0.0187846	0.0347329	-0.540829	0.588626	0.661464
SLC25A40	ENSG00000075303	protein_coding	1405.17	-0.0380533	0.0617208	-0.61654	0.537538	0.614682
TIMM21	ENSG00000075336	protein_coding	1134.03	0.00631125	0.036812	0.171445	0.863874	0.894663
ADD2	ENSG00000075340	protein_coding	252.253	0.0434031	0.144186	0.301021	0.763398	0.812476
FGF4	ENSG00000075388	protein_coding	0.364113	-1.01467	0.475912	-2.13206	0.0330021	0.0608714
RASAL2	ENSG00000075391	protein_coding	2878.05	0.402345	0.0517502	7.77475	7.55974e-15	2.58135e-13
VPS9D1	ENSG00000075399	protein_coding	1051.96	-0.171228	0.0581086	-2.94668	0.00321201	0.00801452
ZNF37A	ENSG00000075407	protein_coding	1703.27	0.0265235	0.0460012	0.576583	0.564221	0.639291
MARK3	ENSG00000075413	protein_coding	2847.55	0.0206755	0.0375529	0.550569	0.581929	0.655192
SLC25A3	ENSG00000075415	protein_coding	20264.9	-0.0244483	0.0504787	-0.484329	0.628152	0.696738
FNDC3B	ENSG00000075420	protein_coding	9884.07	-0.0117345	0.0482971	-0.242964	0.808034	0.849465
FOSL2	ENSG00000075426	protein_coding	15770	0.223663	0.0532513	4.20015	2.66743e-05	0.000112315
CACNG5	ENSG00000075429	protein_coding	7.35153	-0.601284	0.218537	-2.7514	0.00593404	0.0137466
CACNG4	ENSG00000075461	protein_coding	37.7643	-1.39991	0.209435	-6.68423	2.32144e-11	3.7736e-10
FRYL	ENSG00000075539	protein_coding	4382.6	0.120588	0.0459242	2.62581	0.00864427	0.0190633
TMEM131	ENSG00000075568	protein_coding	4202.91	0.0869199	0.0360345	2.41213	0.0158596	0.0323648
FSCN1	ENSG00000075618	protein_coding	5746.28	0.330117	0.0771695	4.27782	1.8873e-05	8.22868e-05
ACTB	ENSG00000075624	protein_coding	228037	-0.188962	0.0438454	-4.30972	1.63459e-05	7.23563e-05
MOCOS	ENSG00000075643	protein_coding	489.808	-0.819052	0.149219	-5.48892	4.04401e-08	3.24484e-07
PLD1	ENSG00000075651	protein_coding	2308.7	0.116792	0.0516721	2.26025	0.0238058	0.0459215
ATP12A	ENSG00000075673	protein_coding	5.74161	1.18112	0.22969	5.14224	2.71488e-07	1.80509e-06
WDR62	ENSG00000075702	protein_coding	173.629	0.0698221	0.0850855	0.820611	0.411868	0.497075
DLG1	ENSG00000075711	protein_coding	3802.49	0.0126219	0.0446007	0.282998	0.777178	0.823622
RAB7A	ENSG00000075785	protein_coding	14646	0.0293697	0.0371043	0.791545	0.428626	0.513138
BCAP29	ENSG00000075790	protein_coding	3491.21	-0.0677644	0.0404032	-1.6772	0.0935032	0.147443
SEC31B	ENSG00000075826	protein_coding	471.652	-0.150068	0.112691	-1.33168	0.182966	0.257367
SART3	ENSG00000075856	protein_coding	3025.31	0.104631	0.0235077	4.4509	8.55111e-06	4.0409e-05
ARHGAP15	ENSG00000075884	protein_coding	931.004	-0.30053	0.0625077	-4.8079	1.52528e-06	8.55708e-06
TUBA3D	ENSG00000075886	protein_coding	711.529	-0.787062	0.219014	-3.59365	0.000326073	0.00105375
PAX2	ENSG00000075891	protein_coding	3919.16	-0.0156126	0.0941091	-0.165899	0.868236	0.898126
EXOSC7	ENSG00000075914	protein_coding	1015.53	0.274369	0.0675804	4.05989	4.90952e-05	0.00019391
KIFAP3	ENSG00000075945	protein_coding	2909.19	-0.0842113	0.0394997	-2.13195	0.0330111	0.0608847
MKRN2	ENSG00000075975	protein_coding	1197.15	0.199407	0.0344037	5.79609	6.78794e-09	6.50325e-08
MCM6	ENSG00000076003	protein_coding	1770.27	-0.0913343	0.0445843	-2.04858	0.0405036	0.0724563
REXO2	ENSG00000076043	protein_coding	2734.34	-0.102353	0.0416154	-2.4595	0.0139131	0.0288827
RBM7	ENSG00000076053	protein_coding	1573.57	0.0434138	0.0444268	0.977199	0.32847	0.414937
RBMS2	ENSG00000076067	protein_coding	5256.72	0.275376	0.0427501	6.44152	1.18284e-10	1.65223e-09
BAZ2A	ENSG00000076108	protein_coding	7600.98	0.214746	0.0367236	5.84765	4.98578e-09	4.91436e-08
PTPN23	ENSG00000076201	protein_coding	2649.03	0.285493	0.0396331	7.20341	5.87265e-13	1.37021e-11
MLH1	ENSG00000076242	protein_coding	1457.07	0.0903304	0.0318524	2.83591	0.00456956	0.0109214
UNG	ENSG00000076248	protein_coding	2235.67	0.0178492	0.0374533	0.476572	0.633667	0.701601
FMO4	ENSG00000076258	protein_coding	746.269	-0.0267988	0.0625745	-0.42827	0.668454	0.731755
KLHL20	ENSG00000076321	protein_coding	1288.47	0.189748	0.0386213	4.91304	8.96747e-07	5.29134e-06
RGS11	ENSG00000076344	protein_coding	75.6034	0.260332	0.124396	2.09277	0.0363695	0.0661111
SLC46A1	ENSG00000076351	protein_coding	786.45	0.028334	0.0531843	0.532752	0.594205	0.666263
PLXNA2	ENSG00000076356	protein_coding	4141.34	0.437198	0.0632467	6.91258	4.75928e-12	9.06062e-11
SPAG5	ENSG00000076382	protein_coding	1070.68	0.000798246	0.103338	0.00772459	0.993837	0.995401
ANKRD13A	ENSG00000076513	protein_coding	6317.96	-0.275591	0.0568336	-4.84909	1.24029e-06	7.10439e-06
TPD52	ENSG00000076554	protein_coding	3327.63	-0.361143	0.0596342	-6.05596	1.39582e-09	1.56043e-08
ACACB	ENSG00000076555	protein_coding	2673.72	0.254225	0.0692543	3.6709	0.0002417	0.000807677
TRAF4	ENSG00000076604	protein_coding	2072.15	-0.233633	0.0549892	-4.24871	2.15009e-05	9.25472e-05
PAG1	ENSG00000076641	protein_coding	3015.99	-0.0607045	0.0610454	-0.994415	0.320021	0.406166
GPATCH1	ENSG00000076650	protein_coding	736.667	-0.0348821	0.028039	-1.24406	0.213479	0.291744
ICAM3	ENSG00000076662	protein_coding	168.187	-0.365079	0.0836107	-4.36641	1.26304e-05	5.73785e-05
NT5C2	ENSG00000076685	protein_coding	1192.49	0.276937	0.0476234	5.81515	6.0581e-09	5.86534e-08
MCAM	ENSG00000076706	protein_coding	26517	0.220069	0.0736296	2.98886	0.00280017	0.00710295
GPC4	ENSG00000076716	protein_coding	3467.49	0.159195	0.0960306	1.65775	0.097367	0.152512
MBNL3	ENSG00000076770	protein_coding	1678.83	0.19041	0.0959072	1.98535	0.0471052	0.0824692
CAMSAP3	ENSG00000076826	protein_coding	1024.95	-0.142754	0.0728952	-1.95835	0.0501889	0.0870498
RAP1GAP	ENSG00000076864	protein_coding	2997.34	0.205311	0.123407	1.66369	0.0961753	0.150976
XAB2	ENSG00000076924	protein_coding	3236.39	-0.0675426	0.0447154	-1.5105	0.130916	0.194827
ARHGEF1	ENSG00000076928	protein_coding	5160.11	-0.118944	0.0553181	-2.15019	0.0315405	0.0585478
STXBP2	ENSG00000076944	protein_coding	2652.3	-0.352718	0.0503477	-7.00564	2.45857e-12	4.9587e-11
MAP2K7	ENSG00000076984	protein_coding	2236.45	-0.0120561	0.0347122	-0.347315	0.728355	0.78322
NMRK2	ENSG00000077009	protein_coding	33.2318	1.48804	0.287853	5.16946	2.34775e-07	1.58141e-06
DGKD	ENSG00000077044	protein_coding	2937.85	0.171881	0.0633438	2.71346	0.0066585	0.0152088
CTTNBP2	ENSG00000077063	protein_coding	1680.33	0.122548	0.0885136	1.38451	0.166202	0.237726
ACTL6B	ENSG00000077080	protein_coding	2.59245	-0.654921	0.250603	-2.61339	0.008965	0.0196712
RARB	ENSG00000077092	protein_coding	1052.3	0.406829	0.0680695	5.97667	2.27751e-09	2.42821e-08
TOP2B	ENSG00000077097	protein_coding	5196.38	0.344049	0.0417039	8.24979	1.58668e-16	7.61339e-15
TM9SF3	ENSG00000077147	protein_coding	12411.2	0.0364491	0.0381501	0.955411	0.33937	0.426074
NFKB2	ENSG00000077150	protein_coding	4549.06	-0.275419	0.0627816	-4.38694	1.14958e-05	5.26782e-05
UBE2T	ENSG00000077152	protein_coding	193.008	-0.201731	0.0755487	-2.67021	0.00758043	0.0170294
PPP1R12B	ENSG00000077157	protein_coding	4282.63	0.421247	0.0801239	5.25744	1.46073e-07	1.02742e-06
DNAJC10	ENSG00000077232	protein_coding	6362.65	-0.0762777	0.0396659	-1.923	0.0544797	0.093424
GTF3C1	ENSG00000077235	protein_coding	4810.72	0.179556	0.0329702	5.44601	5.1513e-08	4.02478e-07
IL4R	ENSG00000077238	protein_coding	4533.94	0.0622401	0.0494156	1.25952	0.207842	0.285624
USP33	ENSG00000077254	protein_coding	3794.7	0.00612824	0.0316356	0.193713	0.8464	0.880827
PAK3	ENSG00000077264	protein_coding	183.224	-0.0958156	0.127861	-0.749375	0.453631	0.536887
CAPN6	ENSG00000077274	protein_coding	1138.67	-0.390717	0.198434	-1.969	0.0489528	0.0852479
DCX	ENSG00000077279	protein_coding	20.0585	-0.630476	0.135635	-4.64832	3.34655e-06	1.73319e-05
SNRPA	ENSG00000077312	protein_coding	2515.88	-0.284416	0.0470684	-6.0426	1.51652e-09	1.68509e-08
SPAG6	ENSG00000077327	protein_coding	13.0041	0.646798	0.160857	4.02095	5.79629e-05	0.000224921
EXOSC5	ENSG00000077348	protein_coding	1240.47	-0.576121	0.0601564	-9.57705	9.98565e-22	1.38661e-19
DYNC1I2	ENSG00000077380	protein_coding	5421.4	0.106714	0.0316772	3.36879	0.000754996	0.0022348
APBB1IP	ENSG00000077420	protein_coding	3473.75	-0.479671	0.0833471	-5.7551	8.65904e-09	8.07308e-08
LRCH4	ENSG00000077454	protein_coding	652.79	0.0815787	0.0544409	1.49848	0.134008	0.198697
FAM76B	ENSG00000077458	protein_coding	896.395	-0.0145831	0.0432978	-0.33681	0.73626	0.789793
SIRT6	ENSG00000077463	protein_coding	925.489	-0.278647	0.0508264	-5.48234	4.19733e-08	3.34909e-07
TYR	ENSG00000077498	protein_coding	5.43491	-0.84783	0.155021	-5.46912	4.52272e-08	3.58129e-07
POLD3	ENSG00000077514	protein_coding	1147.13	-0.0483899	0.029912	-1.61774	0.105718	0.163326
ACTN2	ENSG00000077522	protein_coding	137.248	-0.933873	0.162208	-5.75725	8.54968e-09	7.99383e-08
CAPZB	ENSG00000077549	protein_coding	11280.8	-0.154589	0.0355355	-4.35027	1.3597e-05	6.13319e-05
GPR137B	ENSG00000077585	protein_coding	2879.28	-0.191461	0.0708705	-2.70157	0.00690139	0.0157044
NAALAD2	ENSG00000077616	protein_coding	81.1527	0.219573	0.0832235	2.63835	0.00833094	0.0184825
JADE1	ENSG00000077684	protein_coding	4753.04	0.0526757	0.0543314	0.969526	0.332283	0.418772
SLC25A43	ENSG00000077713	protein_coding	1738.76	-0.314207	0.0460759	-6.81932	9.14699e-12	1.63221e-10
UBE2A	ENSG00000077721	protein_coding	3277.18	-0.0874939	0.0344241	-2.54165	0.0110332	0.0236122
FGFR1	ENSG00000077782	protein_coding	5534.39	0.375968	0.057037	6.59165	4.34962e-11	6.67505e-10
FKBP6	ENSG00000077800	protein_coding	2.36901	-0.372017	0.180522	-2.06079	0.0393229	0.0706465
SMC1B	ENSG00000077935	protein_coding	22.3141	-0.418339	0.123743	-3.3807	0.000723011	0.00214915
FBLN1	ENSG00000077942	protein_coding	2102.16	0.347096	0.122132	2.84198	0.00448348	0.0107358
ITGA8	ENSG00000077943	protein_coding	2110.89	0.312457	0.0899349	3.47426	0.000512265	0.00157808
CST7	ENSG00000077984	protein_coding	989.317	-0.510685	0.110398	-4.62586	3.73039e-06	1.90889e-05
MAP2	ENSG00000078018	protein_coding	1941.16	0.299602	0.0873291	3.43072	0.000601981	0.00182466
PIAS2	ENSG00000078043	protein_coding	2184.79	0.00551664	0.0577095	0.0955933	0.923844	0.94143
AMPH	ENSG00000078053	protein_coding	52.6317	0.540798	0.111828	4.83598	1.32492e-06	7.54953e-06
ARAF	ENSG00000078061	protein_coding	3842.04	0.216531	0.0351001	6.16896	6.87414e-10	8.23968e-09
MCCC1	ENSG00000078070	protein_coding	1970.47	0.0760846	0.0555204	1.37039	0.170566	0.242929
LAMP3	ENSG00000078081	protein_coding	367.362	-0.297436	0.0813053	-3.65826	0.000253936	0.000843889
FAP	ENSG00000078098	protein_coding	398.83	0.324549	0.11682	2.77821	0.00546598	0.0127995
NEBL	ENSG00000078114	protein_coding	3675.63	0.0615418	0.0945297	0.651031	0.515027	0.594174
ACER3	ENSG00000078124	protein_coding	2083.71	-0.319036	0.0461725	-6.90965	4.85857e-12	9.22282e-11
UBE2K	ENSG00000078140	protein_coding	4314.04	-0.00589981	0.0338236	-0.174429	0.861529	0.892739
PIK3C3	ENSG00000078142	protein_coding	2662.81	0.170022	0.0372336	4.56636	4.96276e-06	2.47377e-05
N4BP2	ENSG00000078177	protein_coding	721.021	-0.0595817	0.0561595	-1.06094	0.288718	0.373672
TIGAR	ENSG00000078237	protein_coding	579.876	-0.0110801	0.0493672	-0.224442	0.822414	0.861253
TULP3	ENSG00000078246	protein_coding	2326.47	-0.0402224	0.0398251	-1.00998	0.312507	0.398306
SYNJ2	ENSG00000078269	protein_coding	1127.21	0.417152	0.0588577	7.08746	1.36593e-12	2.94692e-11
ADCY2	ENSG00000078295	protein_coding	343.157	0.124856	0.171712	0.727124	0.46715	0.549876
PPP2R5C	ENSG00000078304	protein_coding	4992.1	0.112496	0.0336528	3.34283	0.00082928	0.00242833
RBFOX1	ENSG00000078328	protein_coding	6.97996	-0.320774	0.204742	-1.56672	0.11718	0.177879
GNB1	ENSG00000078369	protein_coding	23884.7	0.114181	0.0295034	3.87008	0.000108798	0.000394801
HOXA9	ENSG00000078399	protein_coding	830.385	-0.188387	0.0996637	-1.89022	0.0587282	0.099551
EDN1	ENSG00000078401	protein_coding	3855.61	0.224809	0.103745	2.16693	0.0302399	0.0564514
MLLT10	ENSG00000078403	protein_coding	1675.43	0.207898	0.0376112	5.52755	3.24734e-08	2.6582e-07
ZCWPW1	ENSG00000078487	protein_coding	319.804	-0.223435	0.0475264	-4.70128	2.58542e-06	1.37441e-05
ADCYAP1R1	ENSG00000078549	protein_coding	33.4815	-0.00431647	0.151273	-0.0285343	0.977236	0.983179
FGF20	ENSG00000078579	protein_coding	13.1106	-0.220493	0.122576	-1.79882	0.0720471	0.118426
P2RY10	ENSG00000078589	protein_coding	163.592	-0.30574	0.113381	-2.69658	0.00700565	0.0159027
ITM2A	ENSG00000078596	protein_coding	2011.76	0.396886	0.0856526	4.63367	3.59247e-06	1.84677e-05
NRDC	ENSG00000078618	protein_coding	6883.64	-0.0846937	0.0262746	-3.2234	0.00126679	0.00352927
VDAC3	ENSG00000078668	protein_coding	4747.68	-0.180527	0.0391981	-4.60551	4.11459e-06	2.08685e-05
PCM1	ENSG00000078674	protein_coding	6663.59	0.151808	0.0419103	3.62222	0.000292085	0.000955421
TNRC6C	ENSG00000078687	protein_coding	1071.85	0.200689	0.0450748	4.45236	8.49317e-06	4.01559e-05
CBFA2T2	ENSG00000078699	protein_coding	1698.53	0.143342	0.0356265	4.02347	5.7348e-05	0.000222875
BRINP1	ENSG00000078725	protein_coding	308.437	0.263529	0.17333	1.52039	0.128413	0.191674
ITCH	ENSG00000078747	protein_coding	3765.72	0.0741496	0.0390031	1.90112	0.0572861	0.0974307
PKD2L2	ENSG00000078795	protein_coding	13.9974	-0.696968	0.117617	-5.92572	3.10937e-09	3.21342e-08
TP53INP2	ENSG00000078804	protein_coding	6442.98	0.184607	0.0522274	3.53467	0.000408279	0.00128952
SDF4	ENSG00000078808	protein_coding	9633.77	-0.165928	0.0413504	-4.01273	6.00194e-05	0.000232095
MYH7B	ENSG00000078814	protein_coding	175.535	-0.262053	0.102621	-2.55361	0.0106612	0.0229458
BPIFB2	ENSG00000078898	protein_coding	0.918491	0.179091	0.384531	0.46574	0.641402	0.7083
TP73	ENSG00000078900	protein_coding	82.2402	-0.360908	0.105326	-3.42657	0.000611254	0.00184995
TOLLIP	ENSG00000078902	protein_coding	5202.51	-0.0228592	0.0446971	-0.511425	0.609054	0.679918
UBE2D4	ENSG00000078967	protein_coding	1375.3	-0.313745	0.0412557	-7.60489	2.85142e-14	8.62466e-13
CLUL1	ENSG00000079101	protein_coding	39.4095	0.13321	0.10558	1.26169	0.20706	0.284787
RUNX1T1	ENSG00000079102	protein_coding	391.84	0.522606	0.0914834	5.71258	1.11276e-08	1.01313e-07
CDH17	ENSG00000079112	protein_coding	44.8987	0.506256	0.156102	3.24311	0.00118233	0.00332
THOC1	ENSG00000079134	protein_coding	1174.21	-0.151236	0.0497632	-3.03912	0.00237272	0.00612964
FKBP7	ENSG00000079150	protein_coding	719.006	0.0868232	0.0572684	1.51608	0.1295	0.193062
OSBPL6	ENSG00000079156	protein_coding	97.7392	0.433871	0.107143	4.04947	5.13341e-05	0.000201917
SLC1A3	ENSG00000079215	protein_coding	1381.77	-0.136023	0.0983768	-1.38267	0.166765	0.238375
XRCC5	ENSG00000079246	protein_coding	14896.7	0.0157956	0.0318277	0.496283	0.619694	0.689345
LXN	ENSG00000079257	protein_coding	1399.67	-0.0790712	0.0480547	-1.64544	0.099879	0.155749
SP140	ENSG00000079263	protein_coding	270.979	-0.508173	0.0976178	-5.20574	1.9322e-07	1.32547e-06
MKNK1	ENSG00000079277	protein_coding	1623.53	-0.0308701	0.0357634	-0.863176	0.388041	0.473847
TNS1	ENSG00000079308	protein_coding	52041.5	0.354811	0.0646658	5.48684	4.0919e-08	3.27581e-07
REXO1	ENSG00000079313	protein_coding	1780.47	-0.141287	0.0477745	-2.95738	0.0031027	0.00777483
SAR1A	ENSG00000079332	protein_coding	6419.25	-0.0859324	0.0287849	-2.98532	0.00283278	0.00717178
CDC14A	ENSG00000079335	protein_coding	584.867	0.229524	0.0555148	4.13446	3.55789e-05	0.000145491
RAPGEF3	ENSG00000079337	protein_coding	1548.82	0.334399	0.0801789	4.17066	3.03715e-05	0.000126144
CEACAM1	ENSG00000079385	protein_coding	1331.93	-0.0092955	0.0858727	-0.108247	0.913799	0.933728
SENP1	ENSG00000079387	protein_coding	1083.87	0.0423318	0.0313471	1.35042	0.176881	0.250321
DUSP13	ENSG00000079393	protein_coding	3.23545	-0.648525	0.249358	-2.60078	0.00930128	0.0203292
CIC	ENSG00000079432	protein_coding	5396.72	0.174077	0.0387915	4.4875	7.20639e-06	3.46403e-05
LIPE	ENSG00000079435	protein_coding	331.584	0.306027	0.0763557	4.00791	6.12579e-05	0.000236326
FDFT1	ENSG00000079459	protein_coding	3428.94	0.0361152	0.0498274	0.724807	0.46857	0.551081
PAFAH1B3	ENSG00000079462	protein_coding	700.737	-0.408587	0.0715378	-5.71149	1.11994e-08	1.01886e-07
OPHN1	ENSG00000079482	protein_coding	495.785	0.424111	0.0560899	7.56128	3.99109e-14	1.16861e-12
AFM	ENSG00000079557	protein_coding	65.3605	0.260111	0.198328	1.31152	0.189683	0.265081
KIF22	ENSG00000079616	protein_coding	1441.6	-0.0698119	0.0481699	-1.44928	0.147258	0.214978
SCGN	ENSG00000079689	protein_coding	2447.15	0.46695	0.183422	2.54577	0.0109038	0.023378
CARMIL1	ENSG00000079691	protein_coding	1296.27	0.205656	0.048687	4.22404	2.39965e-05	0.000102223
PGM1	ENSG00000079739	protein_coding	7150.91	-0.127033	0.0552879	-2.29766	0.0215813	0.0421921
DDX1	ENSG00000079785	protein_coding	5968.17	0.00943406	0.0285585	0.330342	0.741142	0.793822
DNM2	ENSG00000079805	protein_coding	13749.1	-0.0913549	0.0372571	-2.45201	0.0142059	0.0294026
EPB41L2	ENSG00000079819	protein_coding	5029.64	0.348926	0.0532891	6.54779	5.83944e-11	8.72754e-10
RIMS1	ENSG00000079841	protein_coding	10.4094	0.740006	0.18039	4.10224	4.09161e-05	0.00016454
MOXD1	ENSG00000079931	protein_coding	854.81	0.497982	0.147533	3.3754	0.000737089	0.00218617
STX7	ENSG00000079950	protein_coding	6094.37	-0.0953007	0.0416998	-2.2854	0.0222893	0.0433912
RABL2B	ENSG00000079974	protein_coding	937.753	-0.053476	0.0420932	-1.27042	0.203936	0.281404
KEAP1	ENSG00000079999	protein_coding	4030.14	-0.104957	0.0317085	-3.31005	0.000932781	0.00269779
DDX43	ENSG00000080007	protein_coding	97.8279	-0.447665	0.171494	-2.61039	0.00904391	0.0198234
PTPRH	ENSG00000080031	protein_coding	189.974	-1.00837	0.205094	-4.91666	8.80339e-07	5.20323e-06
DCT	ENSG00000080166	protein_coding	78.6682	-0.204015	0.117556	-1.73547	0.0826577	0.132954
SLC35C2	ENSG00000080189	protein_coding	3054.49	-0.1541	0.0422323	-3.64886	0.000263407	0.000871631
CRYBG3	ENSG00000080200	protein_coding	1044.49	0.413093	0.090035	4.58814	4.47211e-06	2.25025e-05
EPHA6	ENSG00000080224	protein_coding	125.729	-0.195534	0.164817	-1.18637	0.235476	0.316259
SCTR	ENSG00000080293	protein_coding	340.549	-0.143376	0.104226	-1.37563	0.168935	0.240981
RFX3	ENSG00000080298	protein_coding	810.033	0.164589	0.0524293	3.13925	0.0016938	0.00455979
RIF1	ENSG00000080345	protein_coding	3852.83	0.0688237	0.0495265	1.38964	0.16464	0.235808
RAB21	ENSG00000080371	protein_coding	7084.98	-0.100228	0.0388455	-2.58017	0.00987524	0.0214303
SLC4A4	ENSG00000080493	protein_coding	10761	-0.180187	0.0970314	-1.857	0.0633116	0.106154
SMARCA2	ENSG00000080503	protein_coding	6069.85	0.380314	0.0412092	9.22885	2.73543e-20	2.90831e-18
RDH8	ENSG00000080511	protein_coding	2.04372	0.271106	0.257775	1.05172	0.29293	0.378223
SESN1	ENSG00000080546	protein_coding	1939.16	0.11571	0.0528187	2.19069	0.028474	0.0535673
MID2	ENSG00000080561	protein_coding	519.944	0.309232	0.0527542	5.86175	4.58021e-09	4.55378e-08
DNAAF6	ENSG00000080572	protein_coding	0.991605	-0.432797	0.178222	-2.42841	0.015165	0.0311456
COL5A3	ENSG00000080573	protein_coding	2409.52	0.22032	0.0900178	2.44752	0.0143844	0.0297344
SRCAP	ENSG00000080603	protein_coding	7718.95	0.121771	0.0322585	3.77484	0.000160111	0.000557083
PUM3	ENSG00000080608	protein_coding	1409.06	-0.039104	0.0439903	-0.888925	0.374044	0.460139
CPB2	ENSG00000080618	protein_coding	6.33693	-0.847056	0.181401	-4.66953	3.0189e-06	1.58101e-05
CHRNA3	ENSG00000080644	protein_coding	5.9663	-0.0913913	0.12744	-0.717135	0.473291	0.555464
KCNN2	ENSG00000080709	protein_coding	76.8812	0.412899	0.0789283	5.23132	1.68307e-07	1.16927e-06
CNOT4	ENSG00000080802	protein_coding	1702.11	0.0139259	0.0306325	0.454612	0.649388	0.715189
PSEN1	ENSG00000080815	protein_coding	4454.4	0.196656	0.038938	5.05049	4.40677e-07	2.79534e-06
CPOX	ENSG00000080819	protein_coding	1018.6	-0.160534	0.0508498	-3.15701	0.00159394	0.00432014
CLDND1	ENSG00000080822	protein_coding	3877.8	-0.0270858	0.0422153	-0.641611	0.521126	0.599659
MOK	ENSG00000080823	protein_coding	632.883	-0.0507222	0.0662812	-0.765258	0.444118	0.528014
HSP90AA1	ENSG00000080824	protein_coding	34100.4	0.180216	0.0552192	3.26366	0.00109985	0.00311684
RBL1	ENSG00000080839	protein_coding	595.432	0.0256565	0.0454003	0.565118	0.571994	0.646085
DLGAP4	ENSG00000080845	protein_coding	5553.62	-0.0485229	0.0406012	-1.19511	0.232044	0.312401
IGSF9B	ENSG00000080854	protein_coding	88.7587	0.359554	0.10955	3.28209	0.00103039	0.00294467
CFHR2	ENSG00000080910	protein_coding	0.0315229	-0.398137	1.75066	-0.227421	0.820097
NDC80	ENSG00000080986	protein_coding	265.608	-0.126487	0.0746884	-1.69353	0.0903542	0.143286
AP4E1	ENSG00000081014	protein_coding	840.872	0.0808738	0.0405473	1.99455	0.0460917	0.0809949
RSBN1	ENSG00000081019	protein_coding	1790.31	0.0699238	0.0405773	1.72323	0.0848477	0.135994
MAGI3	ENSG00000081026	protein_coding	718.413	0.467814	0.0836675	5.59134	2.25319e-08	1.9163e-07
CXCL2	ENSG00000081041	protein_coding	669.556	-0.455561	0.142547	-3.19586	0.00139416	0.00384137
AFP	ENSG00000081051	protein_coding	26.0631	-0.411373	0.169925	-2.42091	0.0154819	0.0317078
COL4A4	ENSG00000081052	protein_coding	1459.75	0.607846	0.0939122	6.47249	9.64037e-11	1.37235e-09
TCF7	ENSG00000081059	protein_coding	639.194	-0.400526	0.0947601	-4.22674	2.37104e-05	0.000101146
OSTM1	ENSG00000081087	protein_coding	3222.69	-0.076263	0.0522576	-1.45937	0.144464	0.211621
CDH7	ENSG00000081138	protein_coding	14.1002	-0.00844028	0.270895	-0.031157	0.975144	0.981635
IMPG2	ENSG00000081148	protein_coding	38.7921	-0.158347	0.0765085	-2.06967	0.0384832	0.0693781
PCNP	ENSG00000081154	protein_coding	7908.94	-0.0221299	0.0448257	-0.493687	0.621527	0.690914
EXD2	ENSG00000081177	protein_coding	1697.65	0.230925	0.0391778	5.89427	3.76331e-09	3.80768e-08
ARG2	ENSG00000081181	protein_coding	1358.89	-0.101983	0.159521	-0.639305	0.522624	0.601153
MEF2C	ENSG00000081189	protein_coding	5555.03	0.246081	0.0655651	3.75323	0.000174569	0.000602415
PTPRC	ENSG00000081237	protein_coding	5090.58	-0.176653	0.0885252	-1.99552	0.0459866	0.0808413
CACNA1S	ENSG00000081248	protein_coding	10.8221	0.419233	0.120603	3.47613	0.0005087	0.00156911
PKP1	ENSG00000081277	protein_coding	611.484	-0.266579	0.188086	-1.41733	0.156388	0.226026
UBA5	ENSG00000081307	protein_coding	4583.72	-0.209214	0.0573539	-3.64778	0.000264516	0.000874734
STK17B	ENSG00000081320	protein_coding	2496.1	-0.179916	0.0645348	-2.78789	0.00530521	0.0124702
CDC14B	ENSG00000081377	protein_coding	1849.11	0.259557	0.0520655	4.98521	6.18946e-07	3.78875e-06
ZNF510	ENSG00000081386	protein_coding	761.157	0.217793	0.0435851	4.99695	5.82443e-07	3.58831e-06
LRP2	ENSG00000081479	protein_coding	31562.9	0.116912	0.141799	0.824489	0.409662	0.494881
ZNF506	ENSG00000081665	protein_coding	1077.95	0.00897346	0.0385634	0.232694	0.815999	0.855856
JMJD4	ENSG00000081692	protein_coding	795.481	-0.285228	0.0459634	-6.20554	5.45098e-10	6.66451e-09
DUSP12	ENSG00000081721	protein_coding	591.464	-0.00317579	0.0281549	-0.112797	0.910192	0.930975
AACS	ENSG00000081760	protein_coding	1457.81	0.0664741	0.0482858	1.37668	0.168612	0.240587
DELE1	ENSG00000081791	protein_coding	4309.97	0.0483769	0.0292527	1.65376	0.0981766	0.153508
SLC13A1	ENSG00000081800	protein_coding	2097.66	-0.453103	0.200709	-2.25751	0.0239761	0.0461851
CADPS2	ENSG00000081803	protein_coding	2153.48	0.0953616	0.0550215	1.73317	0.0830657	0.13353
PCDHB4	ENSG00000081818	protein_coding	414.069	0.103928	0.101809	1.02081	0.307342	0.392893
PCDHA6	ENSG00000081842	protein_coding	46.1083	0.549366	0.124342	4.41818	9.95334e-06	4.62437e-05
PCDHGA2	ENSG00000081853	protein_coding	173.145	0.130479	0.106991	1.21953	0.222644	0.302097
HSPB11	ENSG00000081870	protein_coding	882.324	-0.376424	0.037429	-10.057	8.55575e-24	1.75026e-21
PHLPP1	ENSG00000081913	protein_coding	828.792	0.380944	0.0548058	6.9508	3.63232e-12	7.07985e-11
ATP8B1	ENSG00000081923	protein_coding	1627.44	0.424926	0.0706512	6.01443	1.80523e-09	1.97146e-08
IL12RB2	ENSG00000081985	protein_coding	269.03	-0.190751	0.187794	-1.01574	0.309751	0.395465
SMARCD3	ENSG00000082014	protein_coding	909.181	0.017839	0.0835216	0.213585	0.830871	0.867957
WDR70	ENSG00000082068	protein_coding	1293.22	-0.0027014	0.0272507	-0.0991313	0.921034	0.939193
FYB1	ENSG00000082074	protein_coding	2948.27	-0.292628	0.0924937	-3.16377	0.00155742	0.00423569
MPP4	ENSG00000082126	protein_coding	10.3132	-0.144942	0.116019	-1.24929	0.211558	0.289749
STRADB	ENSG00000082146	protein_coding	1843.39	-0.360408	0.0583097	-6.18092	6.37279e-10	7.67885e-09
BZW1	ENSG00000082153	protein_coding	5106.49	-0.0253845	0.0399317	-0.635697	0.524974	0.603143
PGR	ENSG00000082175	protein_coding	337.983	0.445665	0.123961	3.59521	0.000324125	0.00104862
C1QTNF3	ENSG00000082196	protein_coding	1210.6	0.373262	0.142709	2.61555	0.00890829	0.0195636
ME2	ENSG00000082212	protein_coding	2393	-0.208086	0.0427885	-4.86313	1.15545e-06	6.66172e-06
C5orf22	ENSG00000082213	protein_coding	1198.98	-0.0153789	0.0378586	-0.406218	0.684582	0.745545
CCNT2	ENSG00000082258	protein_coding	2334.96	-0.0535407	0.0418648	-1.27889	0.200934	0.278049
FAM135A	ENSG00000082269	protein_coding	1484.22	0.0120345	0.0721796	0.166731	0.867582	0.897611
COL19A1	ENSG00000082293	protein_coding	55.9636	0.414458	0.154003	2.69124	0.00711874	0.0161202
EPB41L3	ENSG00000082397	protein_coding	3326.97	-0.152378	0.0700258	-2.17602	0.0295535	0.0553482
COBLL1	ENSG00000082438	protein_coding	4014.24	0.404446	0.0755712	5.35185	8.70608e-08	6.47747e-07
DLG3	ENSG00000082458	protein_coding	2300.02	0.0262793	0.0395993	0.663632	0.506926	0.586897
KCNK2	ENSG00000082482	protein_coding	145.217	0.0691851	0.187324	0.369335	0.711878	0.768749
SERTAD4	ENSG00000082497	protein_coding	689.972	0.0931158	0.084088	1.10736	0.268138	0.351644
TRAF5	ENSG00000082512	protein_coding	1179.14	-0.163359	0.0665406	-2.45503	0.0140872	0.029207
MRPL22	ENSG00000082515	protein_coding	1563.28	-0.379097	0.0453133	-8.36613	5.95413e-17	3.13972e-15
GEMIN5	ENSG00000082516	protein_coding	1920.26	0.0380682	0.0387804	0.981636	0.326279	0.41266
OPRK1	ENSG00000082556	protein_coding	1.58212	0.171325	0.260416	0.657889	0.510609	0.590386
NFE2L1	ENSG00000082641	protein_coding	30598.8	0.0787989	0.0397512	1.9823	0.0474453	0.0830075
SEMA5B	ENSG00000082684	protein_coding	9703.93	-0.0707715	0.0964591	-0.733695	0.463135	0.546031
GSK3B	ENSG00000082701	protein_coding	3346.59	0.222084	0.038378	5.78675	7.17614e-09	6.8309e-08
ITGB5	ENSG00000082781	protein_coding	9956.37	0.105775	0.0490326	2.15724	0.0309869	0.0576487
ERC1	ENSG00000082805	protein_coding	3934.98	0.419723	0.0423094	9.92031	3.39687e-23	6.10424e-21
XPO1	ENSG00000082898	protein_coding	7745.61	-0.0047641	0.0335121	-0.14216	0.886953	0.912525
RNF13	ENSG00000082996	protein_coding	5403.4	-0.0785594	0.0492874	-1.5939	0.110958	0.170068
TRPM3	ENSG00000083067	protein_coding	1086.84	0.39826	0.132045	3.01609	0.00256061	0.0065636
PALB2	ENSG00000083093	protein_coding	681.591	0.0259056	0.0320758	0.807638	0.419299	0.504131
DOP1A	ENSG00000083097	protein_coding	1402.56	0.137842	0.0482372	2.85758	0.00426888	0.0102801
LYRM2	ENSG00000083099	protein_coding	1699.42	0.0650701	0.0367337	1.7714	0.0764944	0.124526
BCKDHB	ENSG00000083123	protein_coding	1046.92	0.157958	0.0716078	2.20588	0.0273924	0.0517662
KAT6A	ENSG00000083168	protein_coding	3680.19	0.260537	0.0419115	6.21636	5.08827e-10	6.26095e-09
TUT7	ENSG00000083223	protein_coding	1719.99	0.100049	0.0430114	2.32611	0.0200126	0.0395698
ULK2	ENSG00000083290	protein_coding	1575.02	0.0694748	0.0368477	1.88546	0.0593678	0.100472
GRHL2	ENSG00000083307	protein_coding	59.4365	0.927465	0.224937	4.12323	3.73604e-05	0.000151894
TNPO1	ENSG00000083312	protein_coding	6392.23	0.073251	0.0443458	1.65181	0.098573	0.154038
PLOD1	ENSG00000083444	protein_coding	17406.4	-0.188079	0.070968	-2.6502	0.00804438	0.017928
P2RX5	ENSG00000083454	protein_coding	47.0585	-0.510103	0.126553	-4.03075	5.55985e-05	0.000216848
ITGAE	ENSG00000083457	protein_coding	617.681	-0.285412	0.0550534	-5.18427	2.16862e-07	1.47222e-06
DIS3	ENSG00000083520	protein_coding	2646.07	0.0418168	0.0335595	1.24605	0.212746	0.290986
PIBF1	ENSG00000083535	protein_coding	971.362	-0.0782809	0.0389272	-2.01095	0.0443303	0.0783353
TDRD3	ENSG00000083544	protein_coding	1814.85	-0.290324	0.0459733	-6.31507	2.70039e-10	3.49457e-09
NUFIP1	ENSG00000083635	protein_coding	472.078	0.0728572	0.0353371	2.06178	0.0392288	0.0705032
PDS5B	ENSG00000083642	protein_coding	2212.58	0.242177	0.0434263	5.57672	2.4509e-08	2.06794e-07
OXCT1	ENSG00000083720	protein_coding	2021.38	0.936073	0.100381	9.32524	1.10736e-20	1.26228e-18
RRAGB	ENSG00000083750	protein_coding	808.588	0.146135	0.0384902	3.79667	0.00014665	0.000514989
EPYC	ENSG00000083782	protein_coding	8.83691	-0.133565	0.203434	-0.656553	0.511468	0.591006
CYLD	ENSG00000083799	protein_coding	4232.57	-0.0504233	0.0429102	-1.17509	0.239959	0.321339
SLC27A5	ENSG00000083807	protein_coding	231.187	-0.190016	0.0661079	-2.87434	0.00404877	0.00981748
ZNF324	ENSG00000083812	protein_coding	430.777	0.140136	0.0291869	4.80134	1.5761e-06	8.81846e-06
ZNF671	ENSG00000083814	protein_coding	664.738	0.34944	0.0576842	6.05781	1.37983e-09	1.54595e-08
ZNF416	ENSG00000083817	protein_coding	309.507	0.300234	0.0416544	7.20775	5.6884e-13	1.33196e-11
ZNF586	ENSG00000083828	protein_coding	422.417	8.81805e-05	0.0474079	0.00186004	0.998516	0.998814
ZNF446	ENSG00000083838	protein_coding	467.949	-0.109906	0.0416013	-2.64189	0.00824451	0.0183103
ZNF264	ENSG00000083844	protein_coding	2171.31	0.10016	0.0348753	2.87195	0.00407942	0.00987768
RPS5	ENSG00000083845	protein_coding	31893.7	-0.338378	0.0675324	-5.01061	5.42583e-07	3.36751e-06
FAT1	ENSG00000083857	protein_coding	18066.2	0.102566	0.0730167	1.40469	0.160114	0.230457
YTHDC1	ENSG00000083896	protein_coding	4792.27	0.179731	0.0274187	6.55505	5.56223e-11	8.35684e-10
CHMP2B	ENSG00000083937	protein_coding	2215.57	-0.00559714	0.0505255	-0.110778	0.911792	0.932092
SMAP2	ENSG00000084070	protein_coding	3659.49	-0.0310706	0.0498752	-0.622967	0.533306	0.610833
PPIE	ENSG00000084072	protein_coding	2236.57	-0.199837	0.0341724	-5.84791	4.978e-09	4.9088e-08
ZMPSTE24	ENSG00000084073	protein_coding	4573.77	-0.0943138	0.0441311	-2.13713	0.0325875	0.0602133
STARD7	ENSG00000084090	protein_coding	8129.27	-0.0216827	0.0348561	-0.622063	0.533901	0.611255
NOA1	ENSG00000084092	protein_coding	1436.81	0.0379783	0.0335752	1.13114	0.257995	0.340771
REST	ENSG00000084093	protein_coding	2528.79	0.21453	0.0446057	4.80948	1.51322e-06	8.49616e-06
HAL	ENSG00000084110	protein_coding	33.8224	-0.0337712	0.102304	-0.330105	0.74132	0.793995
SSH1	ENSG00000084112	protein_coding	3395.45	0.235084	0.035052	6.70672	1.99052e-11	3.28225e-10
GSTP1	ENSG00000084207	protein_coding	16638.2	-0.225008	0.0847476	-2.65503	0.00793007	0.0177107
APLP2	ENSG00000084234	protein_coding	45969.9	0.10551	0.0499559	2.11206	0.0346816	0.0635344
FAM234B	ENSG00000084444	protein_coding	1137.59	0.0620217	0.0709272	0.874442	0.381878	0.467817
SLCO1A2	ENSG00000084453	protein_coding	24.1832	-0.155014	0.227107	-0.68256	0.494885	0.575691
WBP11	ENSG00000084463	protein_coding	4745.17	0.158826	0.0324037	4.90149	9.51116e-07	5.58196e-06
EIF3I	ENSG00000084623	protein_coding	9432.12	-0.30395	0.0403653	-7.52999	5.0746e-14	1.44822e-12
NKAIN1	ENSG00000084628	protein_coding	158.392	-1.2323	0.14201	-8.67751	4.04519e-18	2.70608e-16
COL16A1	ENSG00000084636	protein_coding	1206.99	0.588268	0.120472	4.88302	1.04472e-06	6.07605e-06
TXLNA	ENSG00000084652	protein_coding	4589.93	-0.021907	0.0333259	-0.657355	0.510953	0.590634
APOB	ENSG00000084674	protein_coding	1961.85	-1.60403	0.207776	-7.72001	1.16319e-14	3.82918e-13
NCOA1	ENSG00000084676	protein_coding	3951.05	0.285376	0.0366644	7.78347	7.05645e-15	2.43124e-13
AGBL5	ENSG00000084693	protein_coding	2763.39	-0.0972252	0.044977	-2.16166	0.0306441	0.0571013
EFR3B	ENSG00000084710	protein_coding	234.479	0.666145	0.0851136	7.82654	5.01487e-15	1.77865e-13
KIF3C	ENSG00000084731	protein_coding	818.145	0.499546	0.0563805	8.86028	7.98168e-19	6.09588e-17
RAB10	ENSG00000084733	protein_coding	9042.64	-0.0925315	0.0359598	-2.57319	0.0100766	0.0218229
GCKR	ENSG00000084734	protein_coding	23.2625	-0.944615	0.20953	-4.50825	6.53657e-06	3.17132e-05
HADHA	ENSG00000084754	protein_coding	18276.8	-0.0753126	0.0399248	-1.88636	0.0592462	0.100288
MAPRE3	ENSG00000084764	protein_coding	1134.3	0.0194733	0.0659616	0.295223	0.767824	0.816143
CAD	ENSG00000084774	protein_coding	2152.83	0.0505891	0.0469014	1.07863	0.280754	0.365117
CD59	ENSG00000085063	protein_coding	31674.8	0.00933485	0.0584474	0.159714	0.873107	0.901739
CD82	ENSG00000085117	protein_coding	2274.74	-0.433544	0.0981201	-4.4185	9.93871e-06	4.61945e-05
BCORL1	ENSG00000085185	protein_coding	1228.11	0.230755	0.0423048	5.45459	4.90855e-08	3.85814e-07
ATRX	ENSG00000085224	protein_coding	4974.31	0.212668	0.0462628	4.59695	4.28713e-06	2.16788e-05
AK6	ENSG00000085231	protein_coding	1007.34	-0.236474	0.0363665	-6.50254	7.89746e-11	1.1496e-09
FCN1	ENSG00000085265	protein_coding	717.185	-0.00212419	0.0960966	-0.0221048	0.982364	0.986955
MYNN	ENSG00000085274	protein_coding	1114.75	-0.0695623	0.0385168	-1.80602	0.0709146	0.116824
MECOM	ENSG00000085276	protein_coding	2306.03	0.586634	0.0912675	6.42763	1.29609e-10	1.79921e-09
SCAMP1	ENSG00000085365	protein_coding	4608.08	-0.0395685	0.0630565	-0.627508	0.530326	0.607937
PREP	ENSG00000085377	protein_coding	1634.84	0.0219519	0.0294911	0.744359	0.456659	0.539798
HACE1	ENSG00000085382	protein_coding	783.315	0.190493	0.046484	4.09804	4.16656e-05	0.000167217
SEH1L	ENSG00000085415	protein_coding	2312.79	-0.0150148	0.0349639	-0.429439	0.667604	0.731069
WDR47	ENSG00000085433	protein_coding	1147.6	0.209132	0.037482	5.57955	2.41148e-08	2.03731e-07
WDFY1	ENSG00000085449	protein_coding	4235.83	0.0899416	0.0422235	2.13013	0.0331607	0.0611098
OVGP1	ENSG00000085465	protein_coding	169.686	-0.106308	0.0913112	-1.16424	0.244326	0.326052
SLC25A24	ENSG00000085491	protein_coding	2609.7	0.0690038	0.056147	1.22898	0.219077	0.29807
MAP3K4	ENSG00000085511	protein_coding	1493.48	0.264763	0.033752	7.84439	4.3508e-15	1.56985e-13
PILRA	ENSG00000085514	protein_coding	726.828	-0.321012	0.0710721	-4.51671	6.28065e-06	3.0572e-05
IGSF9	ENSG00000085552	protein_coding	41.7102	-0.334636	0.153921	-2.17407	0.0296999	0.0555905
ABCB1	ENSG00000085563	protein_coding	2296.38	0.0957318	0.118407	0.808495	0.418806	0.503644
ZNF213	ENSG00000085644	protein_coding	999.832	-0.121986	0.0439762	-2.77391	0.00553876	0.0129428
AKR1B1	ENSG00000085662	protein_coding	15316.5	0.0520127	0.102498	0.507453	0.611837	0.68231
CPNE3	ENSG00000085719	protein_coding	7477.31	0.00854341	0.0479827	0.178052	0.858682	0.890716
RRN3	ENSG00000085721	protein_coding	2734.23	-0.116454	0.0366562	-3.17693	0.00148842	0.00406808
CTTN	ENSG00000085733	protein_coding	11047	-0.0149667	0.0338009	-0.442791	0.657917	0.722827
WNT11	ENSG00000085741	protein_coding	53.3275	0.530449	0.149483	3.54857	0.000387336	0.00123008
MTIF2	ENSG00000085760	protein_coding	2049.52	-0.0740342	0.0323237	-2.2904	0.0219984	0.0429087
DDHD2	ENSG00000085788	protein_coding	3037.8	0.109182	0.0431532	2.53009	0.0114032	0.024307
TTC39A	ENSG00000085831	protein_coding	2863.52	-0.424428	0.0890026	-4.76872	1.854e-06	1.0188e-05
EPS15	ENSG00000085832	protein_coding	4780.36	-0.0391879	0.0320019	-1.22455	0.220746	0.299948
ORC1	ENSG00000085840	protein_coding	121.52	0.00373959	0.073855	0.0506343	0.959617	0.969918
MGST2	ENSG00000085871	protein_coding	2560.65	-0.374997	0.0521887	-7.18541	6.7006e-13	1.55075e-11
CHERP	ENSG00000085872	protein_coding	2063.69	0.136949	0.031902	4.2928	1.76434e-05	7.74565e-05
ATG16L1	ENSG00000085978	protein_coding	2683.92	-0.157708	0.0707687	-2.2285	0.0258473	0.0492669
USP40	ENSG00000085982	protein_coding	2930.47	0.0198328	0.0373756	0.530635	0.595672	0.667619
POMGNT1	ENSG00000085998	protein_coding	5378.98	-0.160108	0.0436498	-3.66802	0.000244432	0.0008152
RAD54L	ENSG00000085999	protein_coding	178.663	-0.370382	0.104492	-3.54459	0.000393223	0.00124622
MAST2	ENSG00000086015	protein_coding	1816.55	0.000131376	0.0466262	0.00281765	0.997752	0.998318
DNAJA1	ENSG00000086061	protein_coding	8814.2	0.066485	0.0437854	1.51843	0.128906	0.192297
B4GALT1	ENSG00000086062	protein_coding	11636.8	-0.109315	0.0662811	-1.64927	0.099093	0.154725
CHMP5	ENSG00000086065	protein_coding	4737.92	-0.000149703	0.0471687	-0.00317378	0.997468	0.998143
NFX1	ENSG00000086102	protein_coding	3035.22	0.107631	0.0326368	3.29783	0.000974357	0.00280388
AQP6	ENSG00000086159	protein_coding	406.432	4.97046	0.259891	19.1252	1.55801e-81	7.13944e-77
DIMT1	ENSG00000086189	protein_coding	1650.74	-0.370665	0.0528112	-7.01867	2.23993e-12	4.56799e-11
IPO11	ENSG00000086200	protein_coding	2063.78	0.180024	0.0490878	3.66739	0.000245041	0.000817054
FOLH1	ENSG00000086205	protein_coding	1606.94	-0.0251513	0.0972601	-0.258598	0.795946	0.839376
EIF2AK1	ENSG00000086232	protein_coding	8371.22	-0.170099	0.033802	-5.03224	4.84788e-07	3.04857e-06
NME8	ENSG00000086288	protein_coding	40.4973	-0.550512	0.0903512	-6.09302	1.108e-09	1.26711e-08
EPDR1	ENSG00000086289	protein_coding	3078.3	-0.312666	0.0773128	-4.04417	5.25086e-05	0.000206059
SNX10	ENSG00000086300	protein_coding	6765.47	-0.79649	0.0720159	-11.0599	1.96285e-28	8.99454e-26
SEPHS1	ENSG00000086475	protein_coding	2946.53	-0.0279978	0.0313694	-0.89252	0.372114	0.458332
MRPL28	ENSG00000086504	protein_coding	3094.64	-0.410747	0.0512064	-8.02139	1.04559e-15	4.26143e-14
HBQ1	ENSG00000086506	protein_coding	1.88871	-0.556873	0.19389	-2.87211	0.00407737	0.00987431
ITPKC	ENSG00000086544	protein_coding	2759.15	-0.13165	0.0614931	-2.14088	0.0322835	0.0597382
CEACAM6	ENSG00000086548	protein_coding	6.26059	-0.872725	0.216802	-4.02545	5.68676e-05	0.000221222
FAT2	ENSG00000086570	protein_coding	76.3432	-0.193816	0.102602	-1.88901	0.0588906	0.0998003
RBM22	ENSG00000086589	protein_coding	3353.12	0.000255909	0.0273995	0.00933992	0.992548	0.994479
TMED2	ENSG00000086598	protein_coding	15587.2	-0.22263	0.0435086	-5.11692	3.10559e-07	2.04059e-06
ERO1B	ENSG00000086619	protein_coding	1614.26	-0.121947	0.0561398	-2.17219	0.029841	0.0558091
ZFAND6	ENSG00000086666	protein_coding	3417.82	-0.0522687	0.0415325	-1.2585	0.20821	0.286028
HSD17B2	ENSG00000086696	protein_coding	190.2	-0.284845	0.134162	-2.12315	0.0337416	0.0620455
TXLNG	ENSG00000086712	protein_coding	1314.16	0.163223	0.0407832	4.00222	6.27503e-05	0.000241575
PPEF1	ENSG00000086717	protein_coding	53.1981	-0.35405	0.118382	-2.99075	0.00278296	0.0070644
LAT2	ENSG00000086730	protein_coding	1007.66	-0.322163	0.0671098	-4.80054	1.58238e-06	8.85038e-06
HUWE1	ENSG00000086758	protein_coding	14665.5	0.359157	0.0408669	8.78847	1.51613e-18	1.07881e-16
ZW10	ENSG00000086827	protein_coding	902.022	0.095473	0.0346631	2.75431	0.00588155	0.0136416
ALG9	ENSG00000086848	protein_coding	644.38	-0.0193318	0.029213	-0.661753	0.50813	0.588053
MYBPC2	ENSG00000086967	protein_coding	57.014	-0.450978	0.143327	-3.1465	0.00165236	0.0044616
NOX4	ENSG00000086991	protein_coding	2086.54	-0.382288	0.0964831	-3.96223	7.42532e-05	0.000281019
ACOX3	ENSG00000087008	protein_coding	933.488	-0.191298	0.0409665	-4.66961	3.01767e-06	1.58054e-05
MTMR2	ENSG00000087053	protein_coding	3389.9	-0.0809701	0.0382619	-2.11621	0.034327	0.0629729
PPP1R15A	ENSG00000087074	protein_coding	6144.14	-0.0177544	0.0713576	-0.248809	0.803509	0.845601
HSD17B14	ENSG00000087076	protein_coding	2269.2	-0.635579	0.0839075	-7.57476	3.59801e-14	1.06577e-12
TRIP6	ENSG00000087077	protein_coding	4887.21	-0.231039	0.0453407	-5.09562	3.47601e-07	2.25871e-06
ACHE	ENSG00000087085	protein_coding	338.317	-1.16055	0.131779	-8.80675	1.28832e-18	9.31165e-17
FTL	ENSG00000087086	protein_coding	189195	-0.550067	0.0706764	-7.7829	7.08829e-15	2.44037e-13
SRRT	ENSG00000087087	protein_coding	4349.27	-0.0320813	0.0398812	-0.804423	0.421152	0.505908
BAX	ENSG00000087088	protein_coding	3000.05	-0.154878	0.0467162	-3.31529	0.000915469	0.00265392
NLK	ENSG00000087095	protein_coding	1964.79	0.0223007	0.037334	0.59733	0.550287	0.626493
PIGS	ENSG00000087111	protein_coding	4156.11	0.190122	0.047515	4.00131	6.29918e-05	0.000242444
ADAMTS2	ENSG00000087116	protein_coding	1844.99	0.209334	0.0929455	2.25223	0.0243078	0.0467327
TMPRSS11E	ENSG00000087128	protein_coding	9.30957	1.57424	0.301101	5.22826	1.71115e-07	1.18734e-06
ATXN7L3	ENSG00000087152	protein_coding	2851.63	0.0475383	0.0304186	1.5628	0.118099	0.178984
PGS1	ENSG00000087157	protein_coding	1540.62	0.00665751	0.0378827	0.17574	0.860498	0.891893
PSMC5	ENSG00000087191	protein_coding	6326.59	-0.155246	0.0416608	-3.72642	0.00019422	0.000662444
UIMC1	ENSG00000087206	protein_coding	1391.97	-0.00707545	0.0295759	-0.23923	0.810927	0.851721
CETP	ENSG00000087237	protein_coding	656.111	-0.0960289	0.0837932	-1.14602	0.251786	0.334227
MMP2	ENSG00000087245	protein_coding	5412.09	0.767168	0.105117	7.29823	2.9158e-13	7.21846e-12
MT3	ENSG00000087250	protein_coding	993.435	-0.996303	0.206608	-4.82219	1.41992e-06	8.02497e-06
LPCAT2	ENSG00000087253	protein_coding	1766.49	0.131202	0.0812325	1.61514	0.106281	0.164058
GNAO1	ENSG00000087258	protein_coding	177.674	0.383172	0.105437	3.63412	0.000278934	0.000917248
OGFOD1	ENSG00000087263	protein_coding	1745.46	-0.0149874	0.0333304	-0.449662	0.652954	0.71842
SH3BP2	ENSG00000087266	protein_coding	10471.6	0.0264947	0.0583943	0.45372	0.65003	0.715706
NOP14	ENSG00000087269	protein_coding	1869.19	0.162742	0.0323413	5.03202	4.85331e-07	3.05115e-06
ADD1	ENSG00000087274	protein_coding	16272.7	0.110055	0.0252765	4.35404	1.3365e-05	6.04162e-05
L2HGDH	ENSG00000087299	protein_coding	696.606	0.31028	0.0726683	4.26981	1.95639e-05	8.49758e-05
TXNDC16	ENSG00000087301	protein_coding	958.994	0.230167	0.0628446	3.66248	0.000249786	0.000831308
RTRAF	ENSG00000087302	protein_coding	4567.68	-0.099437	0.0394498	-2.5206	0.0117155	0.0248785
NID2	ENSG00000087303	protein_coding	2549.99	0.699769	0.0931761	7.51017	5.90486e-14	1.65799e-12
GMCL1	ENSG00000087338	protein_coding	2294.32	-0.136017	0.0472328	-2.8797	0.0039805	0.00967088
SF3B2	ENSG00000087365	protein_coding	10113.1	0.093042	0.0237425	3.91879	8.89949e-05	0.000330425
KLHL42	ENSG00000087448	protein_coding	1606.57	0.120029	0.0409698	2.92969	0.00339303	0.00841399
GNAS	ENSG00000087460	protein_coding	62403.8	-0.234502	0.0579701	-4.04522	5.22746e-05	0.000205211
DNM1L	ENSG00000087470	protein_coding	3823.58	-0.0457586	0.0365452	-1.25211	0.21053	0.288592
PTHLH	ENSG00000087494	protein_coding	2842.12	-0.928534	0.194787	-4.76693	1.87056e-06	1.02701e-05
PHACTR3	ENSG00000087495	protein_coding	89.0266	0.735847	0.169059	4.3526	1.34533e-05	6.07612e-05
ERGIC2	ENSG00000087502	protein_coding	2542.33	-0.20313	0.0409002	-4.96647	6.81817e-07	4.13165e-06
TFAP2C	ENSG00000087510	protein_coding	42.5512	-0.0114277	0.197375	-0.0578983	0.95383	0.965396
AURKA	ENSG00000087586	protein_coding	374.251	-0.0710735	0.0818122	-0.868739	0.38499	0.470836
CASS4	ENSG00000087589	protein_coding	348.634	-0.255664	0.0855107	-2.98985	0.00279115	0.00708243
PIR	ENSG00000087842	protein_coding	574.953	-0.338129	0.0568597	-5.94672	2.73569e-09	2.86472e-08
AAMDC	ENSG00000087884	protein_coding	1098.48	-0.286782	0.0547572	-5.23734	1.62911e-07	1.13488e-06
RFX2	ENSG00000087903	protein_coding	844.482	-0.114747	0.0759355	-1.51111	0.13076	0.194642
METTL2A	ENSG00000087995	protein_coding	737.003	-0.0645438	0.0329519	-1.95873	0.0501446	0.0869894
SULT2B1	ENSG00000088002	protein_coding	54.8194	-1.25452	0.148645	-8.43969	3.18191e-17	1.78368e-15
ALG6	ENSG00000088035	protein_coding	790.652	-0.257673	0.0344168	-7.48685	7.05453e-14	1.95327e-12
CNOT3	ENSG00000088038	protein_coding	2109.52	0.0402648	0.0352372	1.14268	0.253172	0.335765
GP6	ENSG00000088053	protein_coding	48.8433	-0.432257	0.123474	-3.50079	0.000463874	0.00144465
PTPN4	ENSG00000088179	protein_coding	1297.55	0.0493256	0.0496495	0.993474	0.320479	0.406624
DDX18	ENSG00000088205	protein_coding	4638.12	0.0585823	0.0353862	1.65551	0.0978204	0.153076
KHSRP	ENSG00000088247	protein_coding	7438.39	0.046569	0.0285709	1.62995	0.103113	0.159949
GNA11	ENSG00000088256	protein_coding	4555.73	0.37074	0.0489782	7.56949	3.74679e-14	1.10413e-12
ASAP3	ENSG00000088280	protein_coding	977.391	-0.0846529	0.0788385	-1.07375	0.282935	0.367442
EDEM2	ENSG00000088298	protein_coding	2527.01	-0.349239	0.042541	-8.20947	2.22168e-16	1.02834e-14
DNMT3B	ENSG00000088305	protein_coding	273.321	-0.284324	0.0783817	-3.62743	0.00028626	0.000938511
REM1	ENSG00000088320	protein_coding	157.538	0.414465	0.0966821	4.28688	1.81199e-05	7.93433e-05
TPX2	ENSG00000088325	protein_coding	898.122	0.0529306	0.098374	0.538055	0.590539	0.663191
PDRG1	ENSG00000088356	protein_coding	916.884	-0.115653	0.0486717	-2.37619	0.0174925	0.0352124
EPB41L1	ENSG00000088367	protein_coding	7020.62	0.219154	0.0492125	4.45322	8.45913e-06	4.00321e-05
SLC15A1	ENSG00000088386	protein_coding	404.95	-0.323967	0.194047	-1.66952	0.0950136	0.14941
DOCK9	ENSG00000088387	protein_coding	5639.12	0.593203	0.0689783	8.59986	7.9816e-18	5.05876e-16
ANKRD10	ENSG00000088448	protein_coding	4686.75	-0.136424	0.0525517	-2.59599	0.00943181	0.0205782
TGDS	ENSG00000088451	protein_coding	715.245	-0.10012	0.037564	-2.66532	0.00769158	0.0172385
DOCK3	ENSG00000088538	protein_coding	65.8722	0.380371	0.141678	2.68475	0.00725839	0.0163911
C3orf18	ENSG00000088543	protein_coding	474.301	0.454771	0.0785113	5.79242	6.93776e-09	6.63016e-08
COQ9	ENSG00000088682	protein_coding	4683.46	-0.22344	0.0625726	-3.57089	0.000355773	0.00113959
TMEM40	ENSG00000088726	protein_coding	4.80406	-0.264697	0.160496	-1.64924	0.0990976	0.154726
KIF9	ENSG00000088727	protein_coding	302.227	0.0533937	0.0514959	1.03685	0.299804	0.385252
ARHGAP28	ENSG00000088756	protein_coding	920.968	-6.50519e-05	0.0799661	-0.000813494	0.999351	0.999482
CRLS1	ENSG00000088766	protein_coding	3149.33	-0.308348	0.0535211	-5.76124	8.34985e-09	7.82782e-08
DEFB127	ENSG00000088782	protein_coding	0.153985	-0.356957	0.600922	-0.594015	0.552502
PPP1R13B	ENSG00000088808	protein_coding	1718.44	0.456323	0.0501645	9.09652	9.32713e-20	8.74042e-18
ATRN	ENSG00000088812	protein_coding	4741.33	0.338917	0.0464485	7.29662	2.95083e-13	7.28943e-12
SMOX	ENSG00000088826	protein_coding	1206.8	0.139565	0.0708808	1.96902	0.0489513	0.0852479
SIGLEC1	ENSG00000088827	protein_coding	1462.45	-0.0460992	0.0969687	-0.475403	0.6345	0.702333
FKBP1A	ENSG00000088832	protein_coding	13604.4	-0.027401	0.04017	-0.682126	0.495159	0.575966
NSFL1C	ENSG00000088833	protein_coding	4950.11	-0.104958	0.0295394	-3.55314	0.000380669	0.00121098
SLC4A11	ENSG00000088836	protein_coding	140.606	0.636941	0.12027	5.29593	1.18412e-07	8.51319e-07
C20orf194	ENSG00000088854	protein_coding	2343.2	0.387985	0.0370018	10.4856	1.00654e-25	2.68148e-23
ZNF343	ENSG00000088876	protein_coding	698.52	0.0221926	0.0330718	0.671044	0.502193	0.582403
EBF4	ENSG00000088881	protein_coding	807.932	0.155579	0.0873809	1.78047	0.0749986	0.122535
CPXM1	ENSG00000088882	protein_coding	385.692	0.398813	0.156759	2.54412	0.0109552	0.0234705
MAVS	ENSG00000088888	protein_coding	6698.98	0.180649	0.0363494	4.9698	6.70212e-07	4.0695e-06
LZTS3	ENSG00000088899	protein_coding	919.264	0.391042	0.0927304	4.21697	2.47602e-05	0.000105144
F11	ENSG00000088926	protein_coding	72.4115	0.564325	0.183028	3.08327	0.00204743	0.00538706
XRN2	ENSG00000088930	protein_coding	5070.73	0.0747605	0.0436201	1.7139	0.086547	0.138258
KIZ	ENSG00000088970	protein_coding	1265.6	-0.0193009	0.0461829	-0.417923	0.676004	0.738273
DYNLL1	ENSG00000088986	protein_coding	8687.7	-0.376628	0.0379689	-9.9194	3.42813e-23	6.13635e-21
TESC	ENSG00000088992	protein_coding	668.018	0.758219	0.118357	6.40621	1.49178e-10	2.0418e-09
SNX5	ENSG00000089006	protein_coding	7869.01	-0.160871	0.031212	-5.15414	2.54799e-07	1.70426e-06
RPL6	ENSG00000089009	protein_coding	35114.2	-0.278865	0.0455624	-6.12051	9.32738e-10	1.08207e-08
SIRPG	ENSG00000089012	protein_coding	276.061	-0.617807	0.128765	-4.79795	1.60297e-06	8.9513e-06
MAPKAPK5	ENSG00000089022	protein_coding	1846.55	-0.0774138	0.0346431	-2.23461	0.025443	0.0486196
P2RX7	ENSG00000089041	protein_coding	1154.17	-0.239569	0.0696838	-3.43794	0.000586157	0.00178117
ESF1	ENSG00000089048	protein_coding	1026.59	0.0375777	0.0401179	0.936682	0.348922	0.435266
RBBP9	ENSG00000089050	protein_coding	2636.94	-0.056344	0.0477157	-1.18083	0.237672	0.318708
ANAPC5	ENSG00000089053	protein_coding	5954.61	-0.107808	0.0317166	-3.39911	0.000676053	0.00202242
SLC23A2	ENSG00000089057	protein_coding	3072.73	0.342948	0.0413879	8.28619	1.16931e-16	5.75867e-15
SLC8B1	ENSG00000089060	protein_coding	2153.76	-0.012405	0.0347142	-0.357348	0.720831	0.77641
TMEM230	ENSG00000089063	protein_coding	7030.32	-0.256887	0.0490067	-5.24187	1.5896e-07	1.11022e-06
DZANK1	ENSG00000089091	protein_coding	387.385	-0.226644	0.0595646	-3.80501	0.000141797	0.000499632
KDM2B	ENSG00000089094	protein_coding	1531.3	0.0864408	0.0314768	2.74617	0.00602952	0.0139382
CFAP61	ENSG00000089101	protein_coding	21.4405	-0.114334	0.100418	-1.13858	0.254879	0.337569
LHX5	ENSG00000089116	protein_coding	0.936902	0.431931	0.303332	1.42396	0.154459	0.223753
TASP1	ENSG00000089123	protein_coding	499.13	0.0428293	0.0373084	1.14798	0.250977	0.333347
OAS1	ENSG00000089127	protein_coding	3784.66	-0.471015	0.0614425	-7.66595	1.7751e-14	5.59823e-13
GCN1	ENSG00000089154	protein_coding	5921.79	0.23497	0.0347103	6.76944	1.2928e-11	2.21961e-10
RPLP0	ENSG00000089157	protein_coding	77878.5	-0.386081	0.0590228	-6.54122	6.10194e-11	9.10206e-10
PXN	ENSG00000089159	protein_coding	10118.4	0.0295894	0.0495881	0.596704	0.550705	0.626891
SIRT4	ENSG00000089163	protein_coding	88.9525	-0.177787	0.0610342	-2.9129	0.00358088	0.00882205
RPH3A	ENSG00000089169	protein_coding	24.4342	-0.761186	0.118168	-6.44157	1.18241e-10	1.65223e-09
KIF16B	ENSG00000089177	protein_coding	1524.35	0.15694	0.0495383	3.16804	0.00153468	0.004178
TRMT6	ENSG00000089195	protein_coding	814.462	-0.0155746	0.038509	-0.404441	0.685889	0.746643
CHGB	ENSG00000089199	protein_coding	96.8917	0.815599	0.168811	4.83145	1.35545e-06	7.70758e-06
PEBP1	ENSG00000089220	protein_coding	29509.1	-0.240754	0.0547734	-4.39546	1.10538e-05	5.07952e-05
TBX5	ENSG00000089225	protein_coding	21.7583	-0.336522	0.256389	-1.31255	0.189336	0.26471
BRAP	ENSG00000089234	protein_coding	1505.71	-0.0521761	0.023345	-2.235	0.0254177	0.0485814
ERP29	ENSG00000089248	protein_coding	7196.99	-0.124285	0.0453373	-2.74134	0.00611889	0.0141191
NOS1	ENSG00000089250	protein_coding	50.9694	0.604467	0.133377	4.53201	5.84254e-06	2.86341e-05
FUS	ENSG00000089280	protein_coding	15720.2	-0.0189062	0.0354497	-0.533326	0.593808	0.665883
IGBP1	ENSG00000089289	protein_coding	5814.09	-0.0948312	0.0455112	-2.08369	0.0371883	0.0673804
FXYD5	ENSG00000089327	protein_coding	5121.34	-0.261804	0.0721472	-3.62875	0.000284792	0.0009339
ZNF302	ENSG00000089335	protein_coding	1875.08	-0.135776	0.0424557	-3.19807	0.00138353	0.00381644
GRAMD1A	ENSG00000089351	protein_coding	4177.96	-0.0936612	0.0489824	-1.91214	0.0558583	0.0954168
FXYD3	ENSG00000089356	protein_coding	160.812	-0.676069	0.171733	-3.93674	8.25957e-05	0.000309044
HEPH	ENSG00000089472	protein_coding	1404.22	0.402312	0.0798283	5.03972	4.66207e-07	2.94303e-06
CDIP1	ENSG00000089486	protein_coding	3809.54	-0.133986	0.0575643	-2.32759	0.0199339	0.0394476
CMTM1	ENSG00000089505	protein_coding	54.2676	0.263737	0.0631874	4.17389	2.99446e-05	0.000124506
KCNH4	ENSG00000089558	protein_coding	27.8521	-0.304322	0.0975031	-3.12115	0.00180143	0.00481026
GANAB	ENSG00000089597	protein_coding	27187.5	0.043441	0.0348942	1.24493	0.213156	0.291415
GMIP	ENSG00000089639	protein_coding	1207.9	-0.162981	0.0602679	-2.70427	0.00684541	0.0155907
RBM41	ENSG00000089682	protein_coding	664.212	-0.031755	0.0438631	-0.723958	0.469092	0.551564
BIRC5	ENSG00000089685	protein_coding	479.646	-0.14019	0.104367	-1.34324	0.179193	0.252851
LAG3	ENSG00000089692	protein_coding	650.097	-0.535145	0.14436	-3.70701	0.000209722	0.000709876
MLF2	ENSG00000089693	protein_coding	9566.13	-0.178058	0.0420119	-4.23827	2.25246e-05	9.65814e-05
OTUB2	ENSG00000089723	protein_coding	120.915	-0.0497133	0.0709307	-0.700871	0.483384	0.56508
DDX24	ENSG00000089737	protein_coding	7746.98	0.292347	0.0361656	8.08356	6.29045e-16	2.65427e-14
ZBTB25	ENSG00000089775	protein_coding	1107.75	-0.106363	0.046936	-2.26613	0.0234435	0.0453165
NECAP1	ENSG00000089818	protein_coding	2315.58	-0.038495	0.0304065	-1.26601	0.205508	0.283139
ARHGAP4	ENSG00000089820	protein_coding	2485.91	-0.198721	0.0713688	-2.78442	0.00536231	0.0125889
ANKRD24	ENSG00000089847	protein_coding	187.006	-0.357379	0.0904085	-3.95294	7.71974e-05	0.000290888
DHX32	ENSG00000089876	protein_coding	2171.45	-0.0153832	0.0377863	-0.407111	0.683927	0.744972
RCOR1	ENSG00000089902	protein_coding	1934.18	0.296023	0.0386998	7.6492	2.0223e-14	6.2955e-13
GPATCH2L	ENSG00000089916	protein_coding	2234.06	0.237754	0.0514863	4.61782	3.87796e-06	1.97778e-05
LTBP4	ENSG00000090006	protein_coding	3391.18	0.493014	0.0976379	5.04942	4.43164e-07	2.80995e-06
BLVRB	ENSG00000090013	protein_coding	3669.31	-0.569161	0.0575825	-9.88427	4.87107e-23	8.48715e-21
SLC9A1	ENSG00000090020	protein_coding	2152.87	0.128488	0.0532439	2.4132	0.015813	0.0322753
SPTLC1	ENSG00000090054	protein_coding	3084.41	0.205157	0.0440572	4.6566	3.21473e-06	1.67381e-05
PAPOLA	ENSG00000090060	protein_coding	8955.78	0.0723245	0.0362132	1.99718	0.0458052	0.0805688
CCNK	ENSG00000090061	protein_coding	409.222	0.292036	0.0498025	5.86388	4.52179e-09	4.4996e-08
PCBP4	ENSG00000090097	protein_coding	798.699	-0.051987	0.0724852	-0.717208	0.473246	0.555425
RGS1	ENSG00000090104	protein_coding	7542.31	-0.553606	0.0984896	-5.62096	1.89904e-08	1.64315e-07
YPEL3	ENSG00000090238	protein_coding	3190.42	-0.410663	0.0628223	-6.53689	6.28095e-11	9.35386e-10
MRPS33	ENSG00000090263	protein_coding	2070.13	-0.383407	0.0513011	-7.47366	7.7993e-14	2.14652e-12
NDUFB2	ENSG00000090266	protein_coding	4173.64	-0.259481	0.0584879	-4.4365	9.14346e-06	4.28415e-05
NUDC	ENSG00000090273	protein_coding	5310.59	-0.131913	0.0465547	-2.8335	0.00460414	0.0109971
MAEA	ENSG00000090316	protein_coding	3410.47	-0.0520253	0.04151	-1.25332	0.210089	0.288151
ICAM1	ENSG00000090339	protein_coding	6313.32	-0.318933	0.0757798	-4.20868	2.56864e-05	0.000108654
STRN4	ENSG00000090372	protein_coding	4350.04	0.0381733	0.0341888	1.11654	0.26419	0.347491
IRAK3	ENSG00000090376	protein_coding	1046.16	0.346461	0.0695971	4.9781	6.42107e-07	3.91744e-06
LYZ	ENSG00000090382	protein_coding	11336.8	-0.251541	0.114593	-2.19508	0.0281578	0.0530552
SI	ENSG00000090402	protein_coding	1.00333	-0.715008	0.302121	-2.36663	0.0179511	0.0360074
MUL1	ENSG00000090432	protein_coding	2506.49	0.124578	0.0429069	2.90345	0.00369082	0.00905444
TFAP4	ENSG00000090447	protein_coding	549.592	-0.17553	0.0531397	-3.30319	0.000955933	0.00275709
PDCD7	ENSG00000090470	protein_coding	1091.54	0.00660909	0.0226347	0.291989	0.770295	0.818201
SPG21	ENSG00000090487	protein_coding	4916.89	-0.137921	0.0285786	-4.82603	1.39284e-06	7.89484e-06
FETUB	ENSG00000090512	protein_coding	4.32058	-1.31204	0.314884	-4.16673	3.09001e-05	0.000128084
DNAJB11	ENSG00000090520	protein_coding	3339.28	-0.199658	0.0414067	-4.82188	1.42213e-06	8.03645e-06
P3H2	ENSG00000090530	protein_coding	10781.8	-0.0975842	0.0782116	-1.24769	0.212143	0.290395
THPO	ENSG00000090534	protein_coding	175.504	-0.587838	0.163572	-3.59376	0.000325936	0.00105352
CHRD	ENSG00000090539	protein_coding	874.463	-0.243936	0.0978595	-2.49271	0.0126771	0.0266279
FLT3LG	ENSG00000090554	protein_coding	137.908	-0.410507	0.067075	-6.12012	9.35043e-10	1.08392e-08
RAB11FIP3	ENSG00000090565	protein_coding	7872.32	-0.119692	0.0607996	-1.96863	0.0489958	0.0853001
GNPTG	ENSG00000090581	protein_coding	5093.66	-0.378986	0.0456808	-8.29639	1.07322e-16	5.3514e-15
ZNF268	ENSG00000090612	protein_coding	1552.77	-0.0146295	0.0388714	-0.376356	0.706652	0.764168
GOLGA3	ENSG00000090615	protein_coding	4383.33	0.0430451	0.0389956	1.10385	0.26966	0.353317
PABPC4	ENSG00000090621	protein_coding	7438.06	-0.0923646	0.0395434	-2.33578	0.0195028	0.0386964
CD209	ENSG00000090659	protein_coding	448.865	0.24686	0.104893	2.35345	0.0186001	0.0371325
CERS4	ENSG00000090661	protein_coding	2486.34	-0.313765	0.0741252	-4.2329	2.30692e-05	9.86571e-05
MCOLN1	ENSG00000090674	protein_coding	1421.65	-0.0893442	0.0397345	-2.24853	0.0245426	0.0471231
USP48	ENSG00000090686	protein_coding	3007.41	0.0682822	0.027511	2.48199	0.013065	0.0273487
EFNB1	ENSG00000090776	protein_coding	3503.74	-0.0501561	0.0532809	-0.941352	0.346524	0.432969
PDPR	ENSG00000090857	protein_coding	4193.04	0.23901	0.0426653	5.60197	2.11932e-08	1.81355e-07
AARS1	ENSG00000090861	protein_coding	8002.91	0.0233832	0.0438245	0.533564	0.593643	0.665829
GLG1	ENSG00000090863	protein_coding	17158.7	0.230964	0.0336344	6.8669	6.5613e-12	1.20895e-10
KIF4A	ENSG00000090889	protein_coding	315.48	0.162075	0.088682	1.8276	0.0676096	0.112182
TNRC6A	ENSG00000090905	protein_coding	3771.75	0.0083652	0.0499743	0.16739	0.867063	0.897155
PLEKHG2	ENSG00000090924	protein_coding	3222.45	0.23231	0.0674805	3.44263	0.000576093	0.00175453
DLL3	ENSG00000090932	protein_coding	5.16214	0.00577409	0.196084	0.029447	0.976508	0.982598
NAT14	ENSG00000090971	protein_coding	1061.27	-0.198307	0.082653	-2.39927	0.0164279	0.0333611
PITPNM2	ENSG00000090975	protein_coding	1575.15	-0.0707966	0.0539368	-1.31259	0.189322	0.264699
EXOC1	ENSG00000090989	protein_coding	2570.62	-0.0252803	0.0263023	-0.961144	0.33648	0.423083
RBM27	ENSG00000091009	protein_coding	1504.53	-0.0869205	0.0358273	-2.4261	0.0152622	0.0313199
POU4F3	ENSG00000091010	protein_coding	2.38988	0.0955952	0.100256	0.953512	0.340331	0.427024
OSBPL8	ENSG00000091039	protein_coding	5326.67	0.0837799	0.0551414	1.51937	0.128671	0.192002
DTX2	ENSG00000091073	protein_coding	828.979	-0.400392	0.0502022	-7.97558	1.51666e-15	5.93504e-14
NLRC4	ENSG00000091106	protein_coding	273.877	-0.229286	0.0701541	-3.26832	0.00108188	0.00307276
PUS7	ENSG00000091127	protein_coding	997.797	-0.175573	0.0495962	-3.54005	0.000400049	0.00126601
LAMB4	ENSG00000091128	protein_coding	47.2831	0.330066	0.105614	3.12522	0.00177673	0.00475177
NRCAM	ENSG00000091129	protein_coding	2739.37	-0.333691	0.114358	-2.91794	0.00352355	0.00869765
LAMB1	ENSG00000091136	protein_coding	14913	0.384522	0.0642547	5.98434	2.17268e-09	2.32783e-08
SLC26A4	ENSG00000091137	protein_coding	74.5118	0.344889	0.084443	4.08428	4.42142e-05	0.000176349
SLC26A3	ENSG00000091138	protein_coding	6.02339	-0.536423	0.128702	-4.16796	3.07339e-05	0.000127464
DLD	ENSG00000091140	protein_coding	5411.88	-0.0101055	0.0590595	-0.171107	0.86414	0.894918
WDR7	ENSG00000091157	protein_coding	1560.75	0.166379	0.0413676	4.02196	5.77162e-05	0.000224059
TXNL1	ENSG00000091164	protein_coding	4239.99	-0.182537	0.0398403	-4.58173	4.61154e-06	2.31278e-05
IL5RA	ENSG00000091181	protein_coding	14.9226	-0.211491	0.121789	-1.73654	0.0824682	0.132732
ABCC6	ENSG00000091262	protein_coding	2173.49	-0.415336	0.10595	-3.92012	8.85034e-05	0.00032884
CMTM6	ENSG00000091317	protein_coding	4556.22	-0.0139156	0.0448406	-0.310335	0.756306	0.806574
ITGA6	ENSG00000091409	protein_coding	13521.9	0.419654	0.0693836	6.04832	1.46367e-09	1.63151e-08
RAPGEF4	ENSG00000091428	protein_coding	1443.56	0.478962	0.0789048	6.07013	1.27806e-09	1.44322e-08
MAP3K20	ENSG00000091436	protein_coding	3779.72	0.083425	0.059515	1.40175	0.160991	0.231537
SMPX	ENSG00000091482	protein_coding	3.45743	-1.90561	0.435955	-4.3711	1.2362e-05	5.63152e-05
FH	ENSG00000091483	protein_coding	3317.94	-0.128968	0.051597	-2.49953	0.0124359	0.0261861
SEL1L3	ENSG00000091490	protein_coding	9441.63	-0.328858	0.0742334	-4.43006	9.4207e-06	4.40369e-05
TF	ENSG00000091513	protein_coding	680.595	-0.334909	0.217208	-1.54188	0.123103	0.185147
CDV3	ENSG00000091527	protein_coding	7854.73	0.163845	0.0441667	3.70969	0.000207511	0.000703327
MYO15A	ENSG00000091536	protein_coding	81.6859	-0.178144	0.0981022	-1.8159	0.0693851	0.114651
ALKBH5	ENSG00000091542	protein_coding	7694.78	-0.0269579	0.030988	-0.869948	0.384329	0.470166
APOH	ENSG00000091583	protein_coding	93.1681	-1.01211	0.201668	-5.01869	5.20238e-07	3.24434e-06
NLRP1	ENSG00000091592	protein_coding	1896.79	0.145904	0.072065	2.02462	0.0429062	0.0761301
PITPNM3	ENSG00000091622	protein_coding	180.856	0.597335	0.0841907	7.09503	1.29328e-12	2.81028e-11
SPAG7	ENSG00000091640	protein_coding	2781.42	-0.0687151	0.0402199	-1.70848	0.0875465	0.139529
ORC6	ENSG00000091651	protein_coding	128.689	-0.0688531	0.0864713	-0.796254	0.425884	0.510442
ZFHX4	ENSG00000091656	protein_coding	258.428	0.337718	0.147156	2.29497	0.0217351	0.0424693
SLC17A6	ENSG00000091664	protein_coding	0.254165	-0.596797	0.459286	-1.2994	0.193806	0.269709
CPA1	ENSG00000091704	protein_coding	4.26566	0.0735539	0.158937	0.462786	0.643518	0.710152
ZC3HC1	ENSG00000091732	protein_coding	1964.09	-0.359534	0.0386124	-9.31137	1.2619e-20	1.43487e-18
ESR1	ENSG00000091831	protein_coding	476.656	-0.14956	0.0883341	-1.69312	0.0904325	0.143405
RGS17	ENSG00000091844	protein_coding	105.069	-0.378576	0.118649	-3.19071	0.00141923	0.00390271
ANGPT2	ENSG00000091879	protein_coding	7415.03	-0.135937	0.0945153	-1.43826	0.150361	0.21879
TMEM101	ENSG00000091947	protein_coding	2419.95	0.123885	0.0831477	1.48994	0.136239	0.201498
CD200	ENSG00000091972	protein_coding	2446.67	-0.0153085	0.0685295	-0.223385	0.823236	0.861868
CCDC80	ENSG00000091986	protein_coding	4201.36	0.348015	0.128579	2.70663	0.00679697	0.0154927
CMA1	ENSG00000092009	protein_coding	12.0543	0.647798	0.157428	4.1149	3.8735e-05	0.000156788
PSME1	ENSG00000092010	protein_coding	11264.2	-0.283019	0.0422609	-6.69695	2.12818e-11	3.49289e-10
PPP2R3C	ENSG00000092020	protein_coding	1065.47	0.0313781	0.0437854	0.716633	0.4736	0.555779
HAUS4	ENSG00000092036	protein_coding	1317.16	0.0214153	0.0435571	0.491662	0.622959	0.69222
JPH4	ENSG00000092051	protein_coding	111.455	0.389212	0.0809447	4.80837	1.52166e-06	8.54088e-06
MYH7	ENSG00000092054	protein_coding	2.66017	-0.0308946	0.176431	-0.175109	0.860994	0.892304
CEBPE	ENSG00000092067	protein_coding	7.5675	-0.206482	0.0887791	-2.32579	0.0200298	0.0395981
SLC7A8	ENSG00000092068	protein_coding	1699.23	0.717063	0.12319	5.82077	5.85774e-09	5.69059e-08
OSGEP	ENSG00000092094	protein_coding	1382.47	-0.140288	0.0431488	-3.25127	0.00114892	0.0032383
SLC22A17	ENSG00000092096	protein_coding	1944.75	0.0888917	0.0889464	0.999385	0.317608	0.40365
RNF31	ENSG00000092098	protein_coding	916.631	0.334601	0.0415973	8.04382	8.708e-16	3.59491e-14
SCFD1	ENSG00000092108	protein_coding	2478.99	-0.0126663	0.0357162	-0.354636	0.722862	0.778299
G2E3	ENSG00000092140	protein_coding	818.308	0.171858	0.0511744	3.35828	0.000784291	0.00231136
HECTD1	ENSG00000092148	protein_coding	7326.01	0.295092	0.0525324	5.61733	1.93929e-08	1.67482e-07
HNRNPC	ENSG00000092199	protein_coding	18908.7	-0.0824435	0.0263143	-3.13303	0.00173014	0.00464479
RPGRIP1	ENSG00000092200	protein_coding	51.7607	-0.205353	0.0642325	-3.19702	0.00138855	0.00382824
SUPT16H	ENSG00000092201	protein_coding	5191.78	0.288643	0.0341346	8.45603	2.76633e-17	1.56693e-15
TOX4	ENSG00000092203	protein_coding	3955.81	0.217382	0.0354892	6.12531	9.05065e-10	1.05477e-08
GEMIN2	ENSG00000092208	protein_coding	279.282	0.0242563	0.0416706	0.582096	0.560502	0.635943
TGM1	ENSG00000092295	protein_coding	185.38	0.920931	0.159733	5.76542	8.1455e-09	7.66132e-08
TINF2	ENSG00000092330	protein_coding	2688.7	0.144602	0.0319643	4.52385	6.07246e-06	2.96531e-05
DAZL	ENSG00000092345	protein_coding	1.84236	-0.461809	0.228478	-2.02124	0.0432551	0.0766689
TBL1Y	ENSG00000092377	protein_coding	10.1283	0.640862	0.232686	2.75419	0.00588372	0.0136459
SEMA6A	ENSG00000092421	protein_coding	6727.54	-0.147997	0.0795196	-1.86114	0.0627239	0.105315
TRPM7	ENSG00000092439	protein_coding	3057.47	0.118622	0.0546467	2.1707	0.0299539	0.0559769
TYRO3	ENSG00000092445	protein_coding	487.402	-0.0681277	0.0738409	-0.922627	0.356201	0.442454
WDR76	ENSG00000092470	protein_coding	372.972	0.0360741	0.0490376	0.735641	0.461949	0.54493
CAPN3	ENSG00000092529	protein_coding	177.813	-0.130782	0.116664	-1.12102	0.262281	0.345446
SNAP23	ENSG00000092531	protein_coding	2917.31	-0.0428236	0.0314106	-1.36335	0.172773	0.245523
TBX15	ENSG00000092607	protein_coding	398.309	0.074971	0.128612	0.582924	0.559945	0.63542
PHGDH	ENSG00000092621	protein_coding	1912.93	0.374178	0.120457	3.10631	0.00189436	0.00502938
COL9A3	ENSG00000092758	protein_coding	57.4085	0.134231	0.13692	0.980359	0.326909	0.413295
EZR	ENSG00000092820	protein_coding	39630	0.171113	0.0627533	2.72677	0.00639583	0.0146805
MYL6	ENSG00000092841	protein_coding	41132.9	-0.17198	0.0432336	-3.97792	6.95216e-05	0.000264928
AGO1	ENSG00000092847	protein_coding	2618.79	0.211072	0.0366969	5.75175	8.83229e-09	8.21798e-08
TEKT2	ENSG00000092850	protein_coding	109.313	-0.185096	0.120314	-1.53844	0.12394	0.186236
CLSPN	ENSG00000092853	protein_coding	134.636	0.269793	0.0801556	3.36587	0.000763039	0.0022561
RFFL	ENSG00000092871	protein_coding	1358.81	-0.0783839	0.0436179	-1.79706	0.0723261	0.118821
UNC13D	ENSG00000092929	protein_coding	899.987	-0.369468	0.0809321	-4.56516	4.99108e-06	2.4868e-05
MFSD11	ENSG00000092931	protein_coding	1164.91	0.0690048	0.0275446	2.5052	0.0122382	0.0258137
DPYSL2	ENSG00000092964	protein_coding	12578.9	0.0423777	0.0536239	0.790278	0.429366	0.513821
TGFB2	ENSG00000092969	protein_coding	474.498	0.669532	0.08783	7.62305	2.4776e-14	7.59421e-13
GPATCH2	ENSG00000092978	protein_coding	895.261	-0.0908543	0.0358625	-2.5334	0.0112961	0.0241061
NUP50	ENSG00000093000	protein_coding	2995.33	0.00107848	0.0301996	0.0357118	0.971512	0.978774
CDC45	ENSG00000093009	protein_coding	159.169	0.0297858	0.0871629	0.341725	0.732558	0.786687
COMT	ENSG00000093010	protein_coding	4749.19	-0.250866	0.0481373	-5.21147	1.8735e-07	1.28945e-06
ADA2	ENSG00000093072	protein_coding	5901.65	0.00364996	0.0821124	0.0444508	0.964545	0.973596
VNN3	ENSG00000093134	protein_coding	21.0215	-0.462695	0.140817	-3.28579	0.00101696	0.00291221
ECHDC1	ENSG00000093144	protein_coding	2719.41	-0.0646485	0.0403704	-1.60138	0.109292	0.167869
LRRFIP2	ENSG00000093167	protein_coding	2588.67	-0.000195431	0.0329378	-0.00593333	0.995266	0.99644
SEC22C	ENSG00000093183	protein_coding	2118.46	0.197359	0.0369823	5.33659	9.47115e-08	6.98096e-07
XYLB	ENSG00000093217	protein_coding	428.362	0.171493	0.07653	2.24086	0.0250354	0.0479568
HDAC6	ENSG00000094631	protein_coding	5165.76	-0.0946208	0.0475326	-1.99065	0.0465192	0.0815992
OR1I1	ENSG00000094661	protein_coding	0.15813	-0.432736	0.64314	-0.672849	0.501044
GABRP	ENSG00000094755	protein_coding	124.785	1.29159	0.17179	7.5184	5.54489e-14	1.56652e-12
KRT31	ENSG00000094796	protein_coding	1.89399	-0.50012	0.225968	-2.21323	0.0268816	0.0509691
CDC6	ENSG00000094804	protein_coding	313.373	-0.116842	0.0817274	-1.42965	0.152816	0.221722
UPRT	ENSG00000094841	protein_coding	803.108	-0.0225184	0.0325592	-0.691613	0.48918	0.5703
CDC23	ENSG00000094880	protein_coding	2244.59	0.0267121	0.0322357	0.82865	0.407303	0.492642
AAAS	ENSG00000094914	protein_coding	2112.43	-0.200466	0.0368159	-5.44508	5.17823e-08	4.04099e-07
CBX5	ENSG00000094916	protein_coding	9616.16	0.034165	0.0417836	0.817665	0.413548	0.498538
FMO2	ENSG00000094963	protein_coding	2699.87	-0.0695909	0.131153	-0.530608	0.59569	0.667619
[truncated: 17,578 more rows]
